# Supplementary material for: Regio- and diastereoselective synthesis of cyclobutylated phenothiazines via [2 + 2] photocycloaddition: demonstrating wavelength-gated cycloreversion inside live cells
Source: Royal Society of Chemistry journal article supplement (doi:10.1039/d4sc07817a), 2024-12-13
Supplement: d4sc07817a3.pdf [file d4sc07817a3.pdf]

*Supporting Information*

**Regio- and diastereoselective synthesis of cyclobutylated phenothiazines via [2+2] photocycloaddition: demonstrating wavelength-gated cycloreversion inside live cell<sup>#</sup>**

Sanhati Sharangi,<sup>†</sup> Barsha Chakraborty,<sup>†</sup> Raushan Kumar Jha, Swarnadeep Mandal, Apurba Lal Koner,\* and Sangit Kumar\*

Department of Chemistry, Indian Institute of Science Education and Research (IISER) Bhopal, Bhopal By-pass Road, Bhauri, Bhopal, Madhya Pradesh, India, 462 066

E-mail: [akoner@iiserb.ac.in](mailto:akoner@iiserb.ac.in), and [sangitkumar@iiserb.ac.in](mailto:sangitkumar@iiserb.ac.in)

<sup>†</sup> Both contributed equally

| <b>Content</b>                                                                                                                                  | <b>Page No.</b> |
|-------------------------------------------------------------------------------------------------------------------------------------------------|-----------------|
| 1. General experimental details                                                                                                                 | S2 – S3         |
| 2. Experimental set-up for the photocatalytic reaction                                                                                          | S3 – S4         |
| 3. External light source of 405 nm                                                                                                              | S4              |
| 4. Lux Meter                                                                                                                                    | S5              |
| 5. Synthesis of angular phenothiazines                                                                                                          | S5 – S7         |
| 6. Synthesis of cyclobutylated phenothiazines <i>via</i><br>light-irradiated two- and three-component couplings                                 | S7 – S30        |
| 7. Photophysical studies                                                                                                                        | S31 – S35       |
| 8. Mechanistic investigations                                                                                                                   | S35 – S39       |
| 9. DFT studies                                                                                                                                  | S40 – S60       |
| 10. HPLC experiment for [2+2] cycloreversion                                                                                                    | S60 – S61       |
| 11. Structure-activity Relationship                                                                                                             | S62 – S66       |
| 12. Cell culture, imaging, and spectroscopy                                                                                                     | S67 – S72       |
| 13. <sup>1</sup> H, <sup>13</sup> C, <sup>19</sup> F and mass spectra of synthesized phenothiazines                                             | S73 – S161      |
| 14. Details X-ray Single-crystal Data of <b>2a</b> , <b>2o</b> , <b>2x</b> , <b>2y</b> , <b>2ad</b> , <b>2af</b> ,<br><b>2ak</b> and <b>2al</b> | S162 – S243     |
| 15. References                                                                                                                                  | S214            |

## 1. General Experimental Details

All the reactions were carried out in a thoroughly oven-dried borosilicate round bottom flask equipped with a magnetic stirrer bar. As an optimized light source, 240 W Blue LEDs were used. Naphthoquinone and 2-amino-benzenethiol were purchased from Spectrochem and Sigma Aldrich and used without further purifying. Commercially available styrene derivatives and solvents were purchased from various suppliers (Sigma-Aldrich, TCI, Alfa Aesar, or Spectrochem) and were directly utilized without further purification or distillation. Styrene derivatives of commercial drugs (ibuprofen, flurbiprofen, gemfibrozil, clofibric acid, and fenbufen) were synthesized following the literature procedures.<sup>1</sup> All the light-driven reactions were performed using borosilicate glassware (25/50 mL RBF) under the Blue LED bulb (240 W) setup (*vide infra*). The progress of the reactions was monitored by performing the thin-layer chromatography (TLC) technique using TLC plates purchased from Merck (Silica gel 60 F<sub>254</sub>). Column chromatography was performed using glass columns loaded with silica gel of mesh size 230-400 (purchased from RANKEM Pvt. Ltd. India) to purify the product using the solvent mixture of EtOAc/ hexane, CH<sub>2</sub>Cl<sub>2</sub>/ hexane or EtOAc/ CH<sub>2</sub>Cl<sub>2</sub>. <sup>1</sup>H, <sup>13</sup>C, and <sup>19</sup>F NMR data were obtained on a Bruker 400/ 500 MHz spectrometer using CDCl<sub>3</sub> as the solvent. <sup>1</sup>H NMR spectra were reported as chemical shift ( $\delta$  ppm), multiplicity, coupling constant (Hz), and integration. Whereas <sup>13</sup>C NMR spectra were reported like chemical shift ( $\delta$  ppm) and multiplicity. Multiplicity was correctly indicated using the following abbreviations: s (singlet), d (doublet), t (triplet), q (quartet), dd (doublet of doublet) and m (multiplet). High-resolution mass spectroscopic (HRMS) analysis was executed on quadrupole-time-of-flight Bruker MicroTOF-Q II mass spectrometer equipped with an electrospray ionization (ESI +ve/-ve) or atmospheric pressure chemical ionization (APCI) source. Mass analysis for the radical trapping experiment was performed on the Agilent 6546 HRLC-QTOF ESI instrument coupled with the 1290 Infinity II LC System. The UV-visible study was performed on Agilent Technologies Cary (5000) series UV-Vis-NIR spectrophotometer. All the fluorescence measurements were carried out using a HORIBA Jobin Yvon fluorimeter by taking the solution in a 1 cm path-length quartz cuvette. Single crystal X-ray data for the synthesized angular phenothiazines were collected on a Bruker D8 VENTURE diffractometer equipped with CMOS Photon 100 detector and MoK $\alpha$  ( $\lambda = 0.71073 \text{ \AA}$ ) and CuK $\alpha$  ( $\lambda = 1.54178$ ) radiations were used, computed with Bruker APEX2. Corresponding melting points of the products were evaluated using an electro-thermal melting point apparatus by taking them within capillary tubes.

**Note 1.** It is worth mentioning that the reaction yield greatly depends upon the quality of styrene used. We have always observed that styrenes from freshly opened bottles or freshly prepared/distilled styrenes provide much better conversion (yield).

**Note 2.** All column chromatographies were performed in low-light conditions and covered with aluminum foil when required. Similar precautions were taken while acquiring the characterization data.

## 2. Experimental Set-up for the Photocatalytic Reaction

Gesto® 5050 SMD LEDs with 200 tri-chip royal-blue LED strips were manually installed on the inner surface of a rectangular cardboard box, and the overall setup was settled on a magnetic stirrer (Figure S1). The blue LED light with 240 W has a  $\lambda_{\text{max}}$  of 457 nm (Figure S2). The reaction vessels were placed approximately 5-6 cm away from the LED strips, and the temperature inside the vessel was around 28 °C.

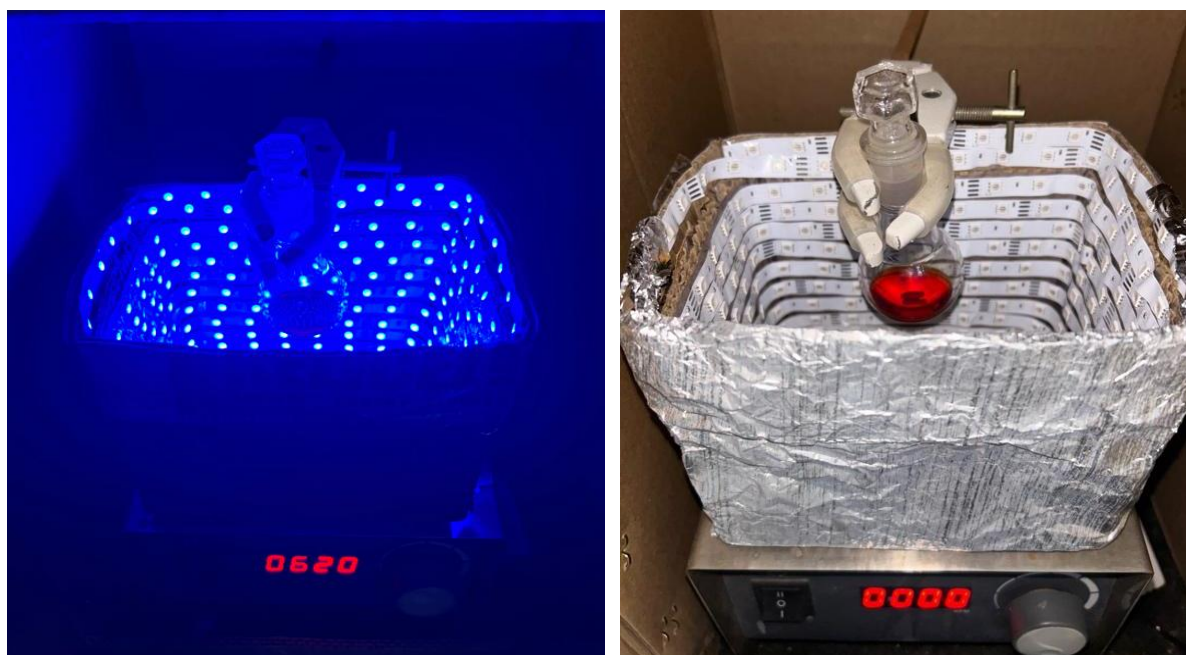

**Figure S1.** Reaction set up: box equipped with blue LEDs on a magnetic stirrer (a) with blue light on (Left), (b) with blue light off (Right)

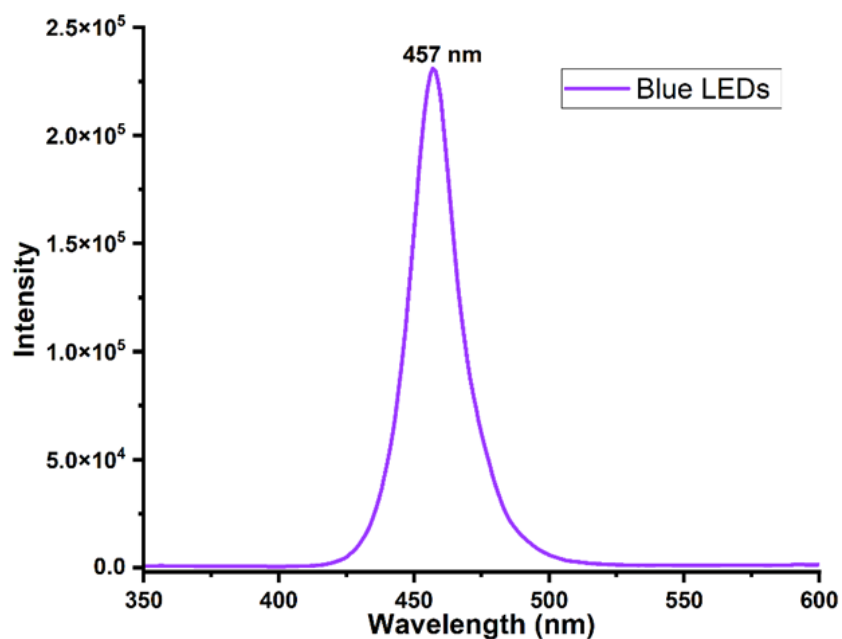

**Figure S2.** Emission plot of blue LEDs light used as a light source in the reaction

### 3. External Light Source of 405 nm

The [2+2] cycloreversion phenomenon from cyclobutylated angular phenothiazines into its precursors was performed by using an external laser light source of 405 nm (power: 5 mW, illuminance  $\sim 88$  lx, measured with a lux meter) (Figure S3).

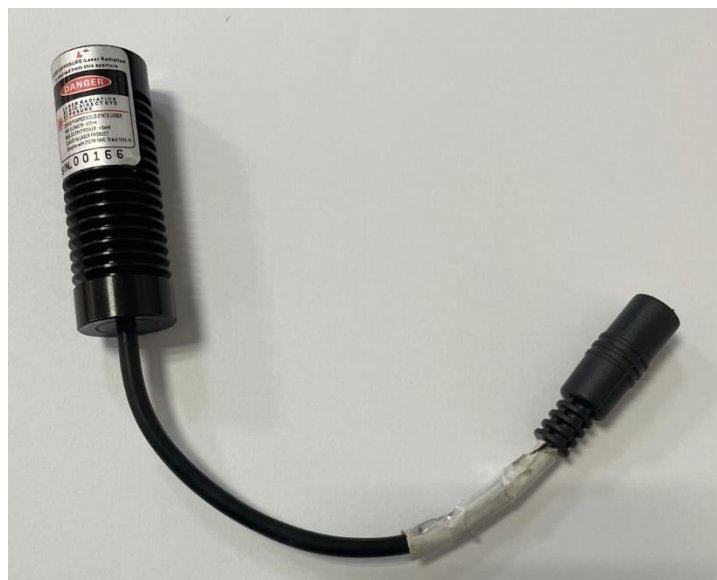

**Figure S3.** Image of the external laser source of 405 nm

## 4. Lux Meter

The dependency of the rate of the [2+2] photocycloaddition reaction on the intensity of incident light has been measured using a Lutron LX-101 LUX METER (Figure S4). The original incident light intensity of the blue LEDs on the reaction vessel was around 900 lx.

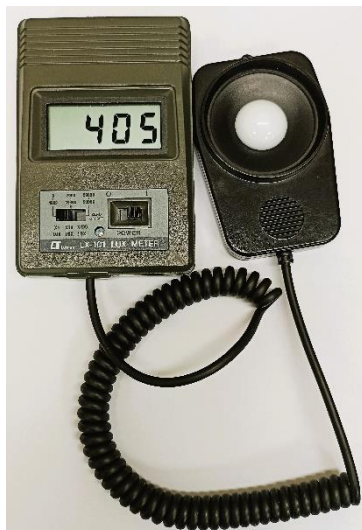

**Figure S4.** Image of lux meter LX-101 (taken under the lab lights)

## 5. Synthesis of Angular Phenothiazines

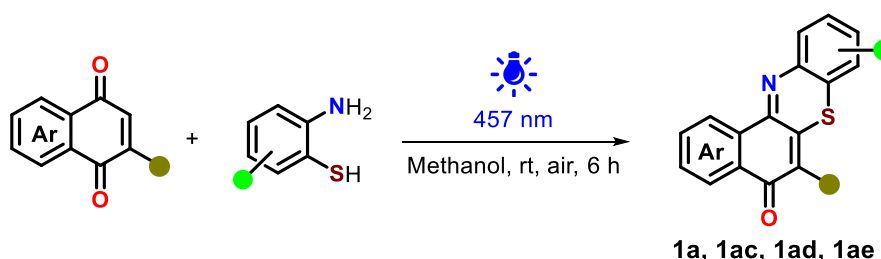

**Scheme S1.** Visible light-irradiated synthesis of the angular phenothiazines

*Synthetic protocol:* Quinone (200 mg, 1 equiv) and *ortho*-aminobenzenethiol (2 equiv) were mixed in methanol (5 mL) and stirred under blue light irradiation (240 W) at room temperature for 6 h within the open-air atmosphere. Then methanol was evaporated under reduced pressure, and the reaction mixture was directly subjected to column chromatography using silica gel of mesh size 230-400 and solvent mixture ranging from 10% EtOAc/hexane up to 4% EtOAc/CH<sub>2</sub>Cl<sub>2</sub> solvent to obtain the desired angular phenothiazines **1a**, **1ac**, **1ad**, **1ae**.

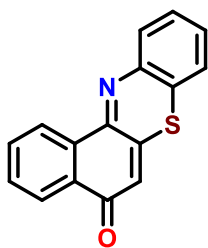

**5H-Benzo[a]phenothiazin-5-one (1a).** Reddish orange solid. Yield 3.6 g (55% at 26 mmol or 4 g scale), mp: 148-150 °C (reported 164-165 °C).<sup>2</sup> Purified using EtOAc/CH<sub>2</sub>Cl<sub>2</sub> (15:85) as eluent. <sup>1</sup>H NMR (400 MHz, CDCl<sub>3</sub>) δ 8.87 – 8.82 (m, 1H), 8.31 – 8.24 (m, 1H), 7.94 – 7.89 (m, 1H), 7.79 – 7.70 (m, 2H), 7.48 – 7.43 (m, 1H), 7.42 – 7.36 (m, 2H), 6.82 (s, 1H); <sup>13</sup>C{<sup>1</sup>H} NMR (126 MHz, CDCl<sub>3</sub>) δ 180.2, 144.8, 138.6, 137.8, 134.2, 133.4, 132.6, 131.6, 131.3, 130.0, 127.8, 125.8, 125.6, 124.7, 122.9, 120.3; HRMS (ESI) m/z: [M]<sup>+</sup> calcd for C<sub>16</sub>H<sub>9</sub>NO<sub>2</sub>S, 279.0349, found 279.0377.

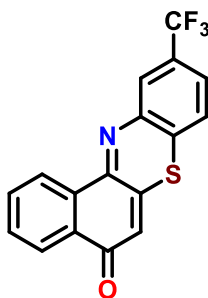

**10-(Trifluoromethyl)-5H-benzo[a]phenothiazin-5-one (1ac).** Yellowish orange solid. Yield 160 mg (37% at 1.3 mmol scale), mp: 162 – 163 °C. Purified using EtOAc/CH<sub>2</sub>Cl<sub>2</sub> (15:85) as eluent. <sup>1</sup>H NMR (400 MHz, CDCl<sub>3</sub>) δ 8.87 – 8.75 (m, 1H), 8.26 (dd, *J* = 6.7, 2.5 Hz, 1H), 8.13 (d, *J* = 2.0 Hz, 1H), 7.81 – 7.73 (m, 2H), 7.61 (dd, *J* = 8.3, 2.0 Hz, 1H), 7.49 (d, *J* = 8.3 Hz, 1H), 6.83 (s, 1H); <sup>13</sup>C{<sup>1</sup>H} NMR (101 MHz, CDCl<sub>3</sub>) δ 180.2, 146.3, 138.6, 136.5, 133.8, 132.6, 132.0 (d, *J* = 8.1 Hz), 130.1 – 129.9 (m), 126.9, 126.0, 125.9 (d, *J* = 3.8 Hz), 125.8, 125.4, 121.5; <sup>19</sup>F{<sup>1</sup>H} NMR (471 MHz, CDCl<sub>3</sub>) δ -62.73; HRLCMS (ESI) m/z: [M+H]<sup>+</sup> calcd for C<sub>17</sub>H<sub>9</sub>F<sub>3</sub>NOS, 332.0351, found 332.0371.

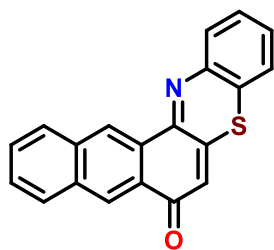

**7H-naphtho[2,3-a] phenothiazin-7-one (1ad).** The product could not be thoroughly purified and characterized; therefore, we proceeded with the next [2+2] cycloaddition reaction with styrene (*vide infra*) without any further purification (crude weight = 160 mg).

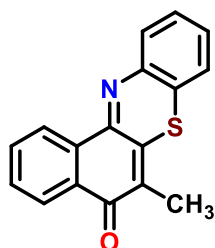

**6-Methyl-5H-benzo[a]phenothiazin-5-one (1ae).** The product could not be thoroughly purified and characterized; therefore, we proceeded with the next [2+2] cycloaddition reaction with styrene (*vide infra*) without any further purification (crude weight = 150 mg).

## 6. Synthesis of Cyclobutylated Phenothiazines *via* Light-Irradiated Two- and Three-Component Couplings

### 6.1. Synthesis of Cyclobutylated Phenothiazines *via* Intermolecular [2+2] Photocycloaddition

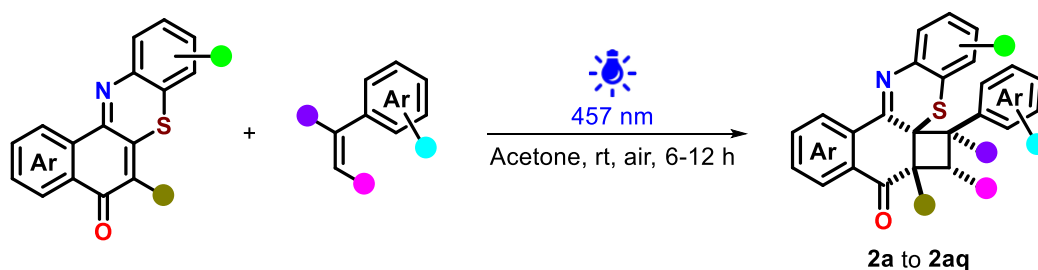

**Scheme S2.** Synthesis of cyclobutylated phenothiazines

*Synthetic protocol:* Angular phenothiazine precursor **1a** (0.76 mmol, 200 mg, 1 equiv) with styrene (2.28 mmol, 260  $\mu$ L, 3 equiv) in a round bottom flask (10ml) in the open-air atmosphere at room temperature for 6-12 h under blue-light irradiation. Reaction progress was analyzed

through the thin layer chromatography. Upon the completion of the reaction, the solvent was evaporated and purified by flash chromatography, which provided the desired cyclobutylated angular phenothiazine.

**Table S1. Additional Reaction Conditions Optimization** <sup>[a]</sup>

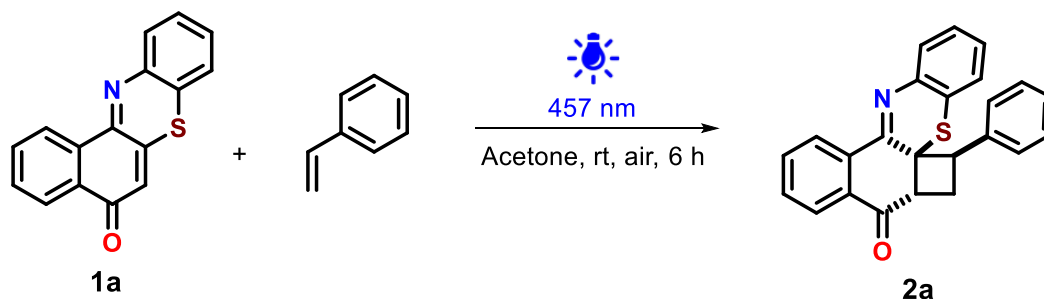

| Entry    | Deviation from the standard condition | Yield (%) <sup>[b]</sup>      |
|----------|---------------------------------------|-------------------------------|
| <b>1</b> | --                                    | <b>99 (96)</b> <sup>[c]</sup> |
| 2        | CH <sub>3</sub> CN                    | 98                            |
| 3        | CH <sub>2</sub> Cl <sub>2</sub>       | 96                            |
| 4        | Toluene                               | 66                            |
| 5        | rt at dark                            | N.R. <sup>[d]</sup>           |
| 6        | 55 °C, at dark                        | N.R.                          |
| 7        | N <sub>2</sub>                        | 98                            |
| 8        | O <sub>2</sub>                        | 96                            |
| 9        | Sunlight                              | 98                            |

<sup>[a]</sup> Standard conditions: angular phenothiazine **1a** (10 mg, 0.038 mmol, 1 equiv) and styrene (13  $\mu$ L, 0.114 mmol, 3 equiv) mixed in 200  $\mu$ L of acetone solvent at room temperature, under air atmosphere, inside a blue-LEDs box and irradiated for 6h; <sup>[b]</sup> NMR yield; <sup>[c]</sup> Isolated yield; <sup>[d]</sup> After 12 h

Here, we have listed the extra reaction optimization conditions, which have been performed to reach the final optimized condition for [2+2] cycloaddition. The reaction conditions were optimized at a 0.038 mmol scale. Firstly, the reaction was performed with an acetone solvent



and open-air conditions under blue light irradiation. The crude reaction mixture was subjected to NMR analysis, showing 99% conversion into desired cyclobutylated phenothiazine **2a** (entry 1, Table S1), and upon column purification, desired cyclobutylated phenothiazine **2a** was obtained in 96% yield. Next, we screened different solvents in place of acetone under standard reaction conditions (entries 2-4, Table S1). When polar solvents, namely acetonitrile or dichloromethane, were used, the yield of **2a** was comparable to the best yield we got using acetone (entries 2 and 3). However, nonpolar solvents like toluene provided only 66% conversion to the product (entry 4). To gain more insight into the reaction mechanism, we executed dark reactions at both room and elevated temperatures (entries 5 and 6). In both cases, no product formation was observed. Further, we performed the reaction under strict inert conditions (entry 7) and a strict oxygen atmosphere (entry 8), both provided a comparable conversion to the desired product **2a**. Finally, we ventured for sunlight instead of blue-LEDs, keeping other reaction conditions the same as the standard condition, and observed 98% conversion to the desired cycloadduct within 6 h (entry 9).

## 6.2. Synthesis of Cyclobutylated Phenothiazine **2a** via Light-Irradiated Three-Component Coupling

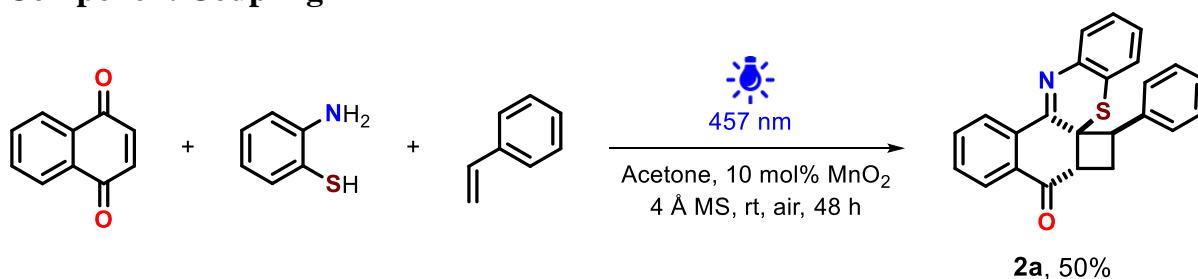

**Scheme S3.** Visible light-irradiated synthesis of cyclobutylated phenothiazine **2a** via a three-component coupling reaction between naphthoquinone, 2-aminothiophenol, and styrene

For the three-component reaction, at first the 1,4-naphthoquinone (10 mg, 0.06 mmol, 1 equiv), 2-aminothiophenol (19  $\mu$ L, 0.18 mmol, 3 equiv) and styrene (28  $\mu$ L, 0.24 mmol, 4 equiv) were taken in a glass vial (3mL) equipped with magnetic stirrer and irradiated under blue-LEDs in air atmosphere at room temperature. After 24 h, only ~5% conversion to the desired cyclobutylated phenothiazine **2a** was observed. Next, we performed the same reaction in the presence of a catalytic amount of Na<sub>2</sub>EosinY photocatalysts (10 mol %); however, no enhancement was observed in the product yield. After realizing that the initial step of the

reaction likely involves an oxidative dehydrogenative coupling of C-H and S-H bonds of 1,4-naphthoquinone and 2-aminothiophenol, we hypothesized that peroxides or some other reactive oxygen species might be generated in the reaction mixture as side products, which might impede the second step. Consequently, we envisioned quenching the *in situ* generated side products, which may facilitate the second step. In pursuit of this, we added a catalytic amount of MnO<sub>2</sub> along with molecular sieves in the reaction mixture, keeping other reaction conditions unaltered. Pleasingly, by adopting this condition, we could obtain around 50% yield of the desired cyclobutylated phenothiazine **2a** from a one-pot-three-component coupling reaction.

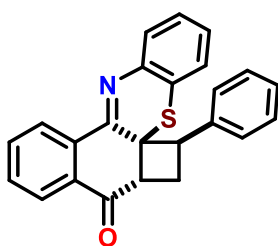

**6-Phenyl-7,7a-dihydrobenzo[*a*]cyclobuta[*d*]phenothiazin-8(6*H*)-one (2a).** Yellow solid. Yield 266 mg (96% at 0.76 mmol scale), m.p. 133-135 °C. Purified using EtOAc/hexane (20:80) as eluent. <sup>1</sup>H NMR (500 MHz, CDCl<sub>3</sub>) δ 8.72 (d, *J* = 8.1 Hz, 1H), 8.19 (dd, *J* = 7.8, 1.4 Hz, 1H), 7.82 – 7.77 (m, 1H), 7.70 – 7.64 (m, 1H), 7.36 (dd, *J* = 7.8, 1.3 Hz, 1H), 7.07 – 7.04 (m, 1H), 6.98 – 6.91 (m, 5H), 6.73 – 6.68 (m, 1H), 6.64 (dd, *J* = 7.8, 1.5 Hz, 1H), 3.91 (t, *J* = 9.2 Hz, 1H), 3.26 (dd, *J* = 10.9, 3.7 Hz, 1H), 3.17 – 3.10 (m, 1H), 2.60 – 2.54 (m, 1H); <sup>13</sup>C{<sup>1</sup>H} NMR (126 MHz, CDCl<sub>3</sub>) δ 196.8, 153.6, 144.2, 137.5, 135.9, 134.8, 132.5, 131.6, 128.2, 127.6, 127.37, 127.36, 127.2, 127.1, 127.0, 126.8, 126.4, 122.6, 49.9, 48.1, 45.3, 27.9; HRMS (ESI) *m/z*: [M+Na]<sup>+</sup> calcd for C<sub>24</sub>H<sub>17</sub>NOSNa, 390. 0923, found 390. 0961.

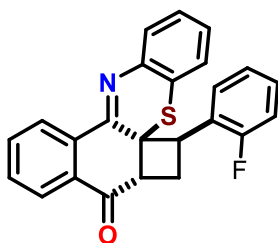

**6-(2-Fluorophenyl)-7,7a-dihydrobenzo[*a*]cyclobuta[*d*]phenothiazin-8(6*H*)-one (2b).** Pale yellow solid. Yield 275 mg (94% at 0.76 mmol scale), mp: 80 – 84 °C. It was purified using EtOAc/hexane (20:80) as eluent. <sup>1</sup>H NMR (500 MHz, CDCl<sub>3</sub>) δ 8.71 (d, *J* = 8.0 Hz, 1H), 8.18 (dd, *J* = 8.0, 1.5 Hz, 1H), 7.82 – 7.76 (m, 1H), 7.70 – 7.64 (m, 1H), 7.41 (dd, *J* = 7.9, 1.2 Hz,

1H), 7.37 – 7.31 (m, 1H), 7.09 – 7.03 (m, 1H), 7.01 – 6.94 (m, 1H), 6.94 – 6.89 (m, 1H), 6.73 – 6.60 (m, 2H), 6.51 – 6.34 (m, 1H), 4.27 (t,  $J = 9.5$  Hz, 1H), 3.30 – 3.20 (m, 1H), 3.15 (q,  $J = 10.8$  Hz, 1H), 2.58 – 2.50 (m, 1H);  $^{13}\text{C}\{^1\text{H}\}$  NMR (126 MHz,  $\text{CDCl}_3$ )  $\delta$  196.7, 161.5, 159.5, 153.1, 144.1, 136.0, 134.9, 132.6, 131.5, 129.1 (d,  $J = 3.7$  Hz), 128.8 (d,  $J = 8.4$  Hz), 127.7, 127.6, 127.3, 126.8, 126.6, 126.5, 125.3, 125.2, 122.8 (d,  $J = 3.5$  Hz), 122.2, 113.9, 113.7, 48.0, 45.3, 41.8 (d,  $J = 2.9$  Hz), 27.1;  $^{19}\text{F}\{^1\text{H}\}$  NMR (471 MHz,  $\text{CDCl}_3$ )  $\delta$  -116.3; HRLCMS (ESI)  $m/z$ :  $[\text{M}+\text{H}]^+$  calcd for  $\text{C}_{24}\text{H}_{17}\text{FNOS}$ , 386.1009, found 386.0990.

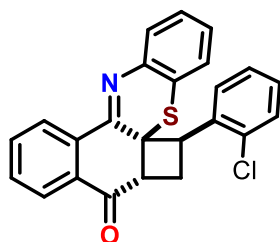

**6-(2-Chlorophenyl)-7,7a-dihydrobenzo[*a*]cyclobuta[*d*]phenothiazin-8(6*H*)-one (2c).**

Brownish-yellow solid. Yield 268 mg (88% at 0.76 mmol scale), mp: 123 – 124 °C. Purified using EtOAc/hexane (20:80) as eluent.  $^1\text{H}$  NMR (500 MHz,  $\text{CDCl}_3$ )  $\delta$  8.71 (d,  $J = 8.0$  Hz, 1H), 8.19 (d,  $J = 7.9$  Hz, 1H), 7.79 (t,  $J = 7.6$  Hz, 1H), 7.67 (t,  $J = 7.6$  Hz, 1H), 7.51 (d,  $J = 7.7$  Hz, 1H), 7.41 (d,  $J = 7.9$  Hz, 1H), 7.16 (t,  $J = 7.6$  Hz, 1H), 7.04 (dd,  $J = 8.3, 4.2$  Hz, 1H), 6.86 (t,  $J = 7.7$  Hz, 1H), 6.77 (d,  $J = 8.0$  Hz, 1H), 6.65 (d,  $J = 4.5$  Hz, 2H), 4.55 (t,  $J = 9.5$  Hz, 1H), 3.20 (d,  $J = 11.0$  Hz, 1H), 3.12 (q,  $J = 10.8$  Hz, 1H), 2.55 (t,  $J = 10.4$  Hz, 1H);  $^{13}\text{C}\{^1\text{H}\}$  NMR (126 MHz,  $\text{CDCl}_3$ )  $\delta$  196.9, 153.0, 144.0, 136.1, 135.4, 134.9, 134.3, 132.7, 131.5, 129.1, 128.3, 128.2, 127.8, 127.7, 127.2, 126.7, 126.43, 126.39, 125.5, 122.1, 48.3, 45.3, 44.9, 28.0; HRLCMS (APCI)  $m/z$ :  $[\text{M}+\text{H}]^+$  calcd for  $\text{C}_{24}\text{H}_{17}\text{ClNOS}$ , 402.0714, found 402.0727.

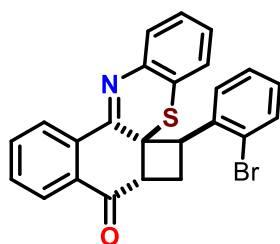

**6-(2-Bromophenyl)-7,7a-dihydrobenzo[*a*]cyclobuta[*d*]phenothiazin-8(6*H*)-one (2d).**

Light brown solid. Yield 280 mg (83% at 0.76 mmol scale), mp: 68 – 70 °C. Purified using EtOAc/hexane (20:80) as eluent.  $^1\text{H}$  NMR (500 MHz,  $\text{CDCl}_3$ )  $\delta$  8.71 (d,  $J = 8.0$  Hz, 1H), 8.20 (dd,  $J = 7.8, 1.4$  Hz, 1H), 7.82 – 7.77 (m, 1H), 7.70 – 7.65 (m, 1H), 7.53 (dd,  $J = 7.9, 1.7$  Hz, 1H), 7.42 (d,  $J = 7.9$  Hz, 1H), 7.21 (t,  $J = 7.5$  Hz, 1H), 7.05 – 7.00 (m, 1H), 6.97 (dd,  $J = 7.9,$

1.3 Hz, 1H), 6.81 – 6.76 (m, 1H), 6.66 (d,  $J = 4.2$  Hz, 2H), 4.55 (t,  $J = 9.6$  Hz, 1H), 3.22 – 3.15 (m, 1H), 3.10 (q,  $J = 10.9$  Hz, 1H), 2.58 – 2.52 (m, 1H);  $^{13}\text{C}\{^1\text{H}\}$  NMR (126 MHz,  $\text{CDCl}_3$ )  $\delta$  196.9, 153.0, 144.0, 137.0, 136.1, 134.9, 132.7, 131.7, 131.5, 129.3, 128.5, 127.9, 127.7, 127.2, 126.8, 126.4, 126.1, 125.3, 122.1, 48.3, 47.4, 45.3, 28.4; HRMS (ESI)  $m/z$ :  $[\text{M}-\text{H}]^+$  calcd for  $\text{C}_{24}\text{H}_{15}\text{BrNOS}$ , 444.0052, found 444.0044.

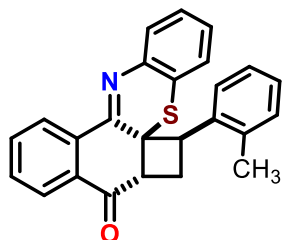

**6-(*o*-Tolyl)-7,7a-dihydrobenzo[*a*]cyclobuta[*d*]phenothiazin-8(6*H*)-one (2e).** Brown solid. Yield 275 mg (95% at 0.76 mmol scale), mp: 125 – 128 °C. Purified using EtOAc/hexane (20:80) as eluent.  $^1\text{H}$  NMR (500 MHz,  $\text{CDCl}_3$ )  $\delta$  8.70 (d,  $J = 8.1$  Hz, 1H), 8.20 (dd,  $J = 7.9$ , 1.5 Hz, 1H), 7.82 – 7.77 (m, 1H), 7.68 (t,  $J = 7.5$  Hz, 1H), 7.47 (d,  $J = 7.8$  Hz, 1H), 7.33 (d,  $J = 7.9$  Hz, 1H), 7.11 (t,  $J = 7.6$  Hz, 1H), 7.03 – 6.98 (m, 1H), 6.86 – 6.82 (m, 1H), 6.67 (d,  $J = 4.3$  Hz, 2H), 6.58 (d,  $J = 7.5$  Hz, 1H), 4.23 (t,  $J = 9.4$  Hz, 1H), 3.24 – 3.12 (m, 2H), 2.56 – 2.50 (m, 1H), 1.82 (s, 3H);  $^{13}\text{C}\{^1\text{H}\}$  NMR (126 MHz,  $\text{CDCl}_3$ )  $\delta$  197.1, 154.0, 143.8, 136.2, 136.0, 134.8, 132.8, 131.6, 129.2, 127.7, 127.6, 127.3, 127.1, 127.0, 126.9, 126.8, 126.3, 124.8, 122.8, 48.5, 45.3, 45.0, 28.6, 19.2; HRLCMS (ESI)  $m/z$ :  $[\text{M}+\text{H}]^+$  calcd for  $\text{C}_{25}\text{H}_{20}\text{NOS}$ , 382.1260, found 382.1250.

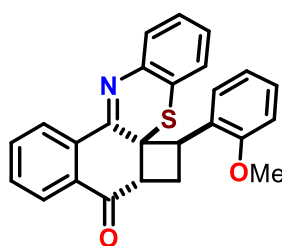

**6-(2-Methoxyphenyl)-7,7a-dihydrobenzo[*a*]cyclobuta[*d*]phenothiazin-8(6*H*)-one (2f).** Yellow solid. Yield 256 mg (85% at 0.76 mmol scale), mp: 128 – 130 °C. Purified using EtOAc/hexane (20:80) as eluent.  $^1\text{H}$  NMR (400 MHz,  $\text{CDCl}_3$ )  $\delta$  8.80 (d,  $J = 8.1$  Hz, 1H), 8.22 (d,  $J = 7.8$  Hz, 1H), 7.83 (t,  $J = 7.7$  Hz, 1H), 7.70 (t,  $J = 7.5$  Hz, 1H), 7.41 (d,  $J = 7.8$  Hz, 1H), 7.33 (d,  $J = 7.5$  Hz, 1H), 7.07 (t,  $J = 7.4$  Hz, 1H), 6.95 (t,  $J = 7.7$  Hz, 1H), 6.86 (t,  $J = 7.4$  Hz, 1H), 6.70 (d,  $J = 8.5$  Hz, 2H), 6.23 (d,  $J = 8.1$  Hz, 1H), 4.52 (t,  $J = 9.5$  Hz, 1H), 3.39 (s, 3H), 3.23 (d,  $J = 10.9$  Hz, 1H), 3.20 – 3.11 (m, 1H), 2.49 (t,  $J = 10.2$  Hz, 1H);  $^{13}\text{C}\{^1\text{H}\}$  NMR (126

**MHz, CDCl<sub>3</sub>)**  $\delta$  197.2, 156.9, 154.1, 143.8, 134.7, 132.9, 131.6, 128.4, 128.3, 127.8, 127.3, 127.1, 126.9, 126.7, 126.4, 126.0, 122.7, 119.1, 108.2, 54.5, 48.9, 45.7, 42.5, 27.1; **HRLCMS (ESI) *m/z***: [M+H]<sup>+</sup> calcd for C<sub>25</sub>H<sub>20</sub>NO<sub>2</sub>S, 398.1185, found 398.1209.

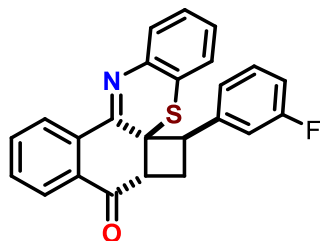

**6-(3-Fluorophenyl)-7,7a-dihydrobenzo[*a*]cyclobuta[*d*]phenothiazin-8(6*H*)-one (2g).**

Brown solid. Yield 248 mg (85% at 0.76 mmol scale), mp: 114 – 116 °C. Purified using EtOAc/hexane (20:80) as eluent. **<sup>1</sup>H NMR (500 MHz, CDCl<sub>3</sub>)**  $\delta$  8.71 (d, *J* = 8.0 Hz, 1H), 8.19 (d, *J* = 7.8 Hz, 1H), 7.80 (t, *J* = 7.7 Hz, 1H), 7.68 (t, *J* = 7.5 Hz, 1H), 7.37 (d, *J* = 7.9 Hz, 1H), 7.11 – 7.05 (m, 1H), 6.89 (q, *J* = 7.5 Hz, 1H), 6.77 – 6.64 (m, 5H), 3.90 (t, *J* = 9.3 Hz, 1H), 3.24 (dd, *J* = 10.8, 3.4 Hz, 1H), 3.13 – 3.05 (m, 1H), 2.60 – 2.53 (m, 1H); **<sup>13</sup>C{<sup>1</sup>H} NMR (126 MHz, CDCl<sub>3</sub>)**  $\delta$  196.5, 163.1, 161.1, 153.3, 144.2, 140.1 (d, *J* = 7.3 Hz), 135.8, 134.9, 132.5, 131.7, 128.3 (d, *J* = 8.3 Hz), 127.6, 127.44, 127.38, 127.1, 127.0, 126.7, 124.0 (d, *J* = 2.8 Hz), 122.3, 115.2, 115.0, 114.1, 114.0, 49.6 (d, *J* = 1.9 Hz), 48.0, 45.2, 27.9; **HRLCMS (APCI) *m/z***: [M+H]<sup>+</sup> calcd for C<sub>24</sub>H<sub>17</sub>FNOS, 386.1009, found 386.0980.

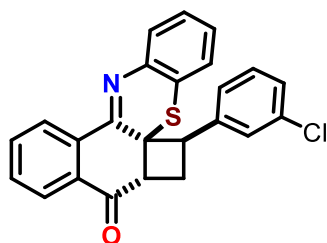

**6-(3-Chlorophenyl)-7,7a-dihydrobenzo[*a*]cyclobuta[*d*]phenothiazin-8(6*H*)-one (2h).**

Pale yellow solid. Yield 286 mg (94% at 0.76 mmol scale), mp: 129 – 131 °C. Purified using EtOAc/hexane (20:80) as eluent. **<sup>1</sup>H NMR (500 MHz, CDCl<sub>3</sub>)**  $\delta$  8.71 (d, *J* = 8.0 Hz, 1H), 8.18 (d, *J* = 7.8 Hz, 1H), 7.79 (d, *J* = 7.8 Hz, 1H), 7.69 (d, *J* = 7.5 Hz, 1H), 7.38 (d, *J* = 7.9 Hz, 1H), 7.09 (t, *J* = 7.6 Hz, 1H), 6.96 – 6.86 (m, 3H), 6.82 (d, *J* = 7.6 Hz, 1H), 6.76 (t, *J* = 7.5 Hz, 1H), 6.71 (d, *J* = 7.7 Hz, 1H), 3.87 (t, *J* = 9.3 Hz, 1H), 3.23 (dd, *J* = 10.6, 3.4 Hz, 1H), 3.10 (q, *J* = 10.5 Hz, 1H), 2.60 – 2.53 (m, 1H); **<sup>13</sup>C{<sup>1</sup>H} NMR (126 MHz, CDCl<sub>3</sub>)**  $\delta$  196.5, 153.4, 144.2, 139.5, 135.7, 134.9, 133.2, 132.5, 131.7, 128.4, 128.1, 127.6, 127.40, 127.38, 127.3, 127.1,

127.0, 126.9, 126.3, 122.2, 49.5, 48.0, 45.1, 27.8; **HRLCMS (ESI)  $m/z$** :  $[M+H]^+$  calcd for  $C_{24}H_{17}ClNOS$ , 402.0714, found 402.0700.

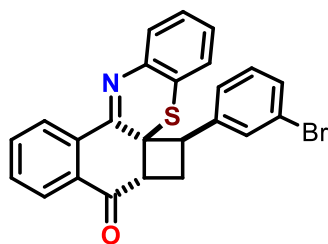

**6-(3-Bromophenyl)-7,7a-dihydrobenzo[*a*]cyclobuta[*d*]phenothiazin-8(6*H*)-one (2i).**

Greyish brown solid. Yield 284 mg (84% at 0.76 mmol scale), mp: 138 – 140 °C. Purified using EtOAc/hexane (20:80) as eluent.  **$^1H$  NMR (500 MHz,  $CDCl_3$ )**  $\delta$  8.73 (d,  $J = 8.0$  Hz, 1H), 8.21 (d,  $J = 7.7$  Hz, 1H), 7.83 (t,  $J = 7.6$  Hz, 1H), 7.71 (t,  $J = 7.5$  Hz, 1H), 7.41 (d,  $J = 7.9$  Hz, 1H), 7.16 – 7.06 (m, 3H), 6.80 (t,  $J = 7.5$  Hz, 1H), 6.75 (d,  $J = 7.6$  Hz, 1H), 3.89 (t,  $J = 9.3$  Hz, 1H), 3.26 (dd,  $J = 10.5, 2.7$  Hz, 1H), 3.12 (q,  $J = 10.4$  Hz, 1H), 2.59 (ddd,  $J = 12.1, 8.8, 3.4$  Hz, 1H);  **$^{13}C\{^1H\}$  NMR (126 MHz,  $CDCl_3$ )**  $\delta$  196.5, 153.4, 144.2, 139.8, 135.7, 134.9, 132.5, 131.7, 131.4, 130.3, 128.4, 127.6, 127.41, 127.38, 127.1, 127.05, 126.95, 126.8, 122.2, 121.5, 49.5, 48.0, 45.1, 27.8; **HRLCMS (ESI)  $m/z$** :  $[M+H]^+$  calcd for  $C_{24}H_{17}BrNOS$ , 446.0209, found 446.0182.

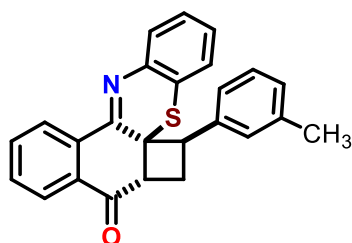

**6-(*m*-Tolyl)-7,7a-dihydrobenzo[*a*]cyclobuta[*d*]phenothiazin-8(6*H*)-one (2j).**

Bright yellow solid. Yield 237 mg (82% at 0.76 mmol scale), mp: 100 – 102 °C. Purified using EtOAc/hexane (20:80) as eluent.  **$^1H$  NMR (400 MHz,  $CDCl_3$ )**  $\delta$  8.73 (d,  $J = 8.0$  Hz, 1H), 8.19 (d,  $J = 7.7$  Hz, 1H), 7.80 (t,  $J = 7.5$  Hz, 1H), 7.67 (t,  $J = 7.4$  Hz, 1H), 7.39 (d,  $J = 7.8$  Hz, 1H), 7.06 (t,  $J = 7.4$  Hz, 1H), 6.92 (t,  $J = 7.4$  Hz, 1H), 6.84 – 6.71 (m, 3H), 6.67 (d,  $J = 7.7$  Hz, 1H), 6.61 (s, 1H), 3.88 (t,  $J = 9.0$  Hz, 1H), 3.30 – 3.23 (m, 1H), 3.17 – 3.08 (m, 1H), 2.60 – 2.51 (m, 1H), 2.08 (s, 3H);  **$^{13}C\{^1H\}$  NMR (101 MHz,  $CDCl_3$ )**  $\delta$  196.8, 153.8, 144.3, 137.4, 136.7, 135.9, 134.8, 132.5, 131.6, 129.4, 127.9, 127.6, 127.4, 127.3, 127.1, 127.0, 126.8, 126.4, 125.0, 122.7, 50.0, 48.0, 45.3, 27.8, 21.1; **HRLCMS (ESI)  $m/z$** :  $[M+H]^+$  calcd for  $C_{25}H_{20}NOS$ , 382.1266, found 382.1260.

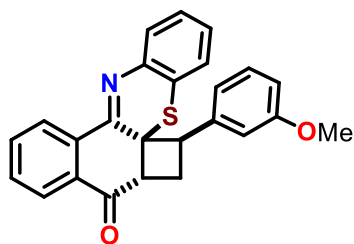

**6-(*m*-Tolyl)-7,7a-dihydrobenzo[*a*]cyclobuta[*d*]phenothiazin-8(6*H*)-one (2k).** Bright orange solid. Yield 293 mg (97% at 0.76 mmol scale), mp: 84 – 86 °C. Purified using EtOAc/hexane (20:80) as eluent.  $^1\text{H NMR}$  (500 MHz,  $\text{CDCl}_3$ )  $\delta$  8.72 (d,  $J = 8.0$  Hz, 1H), 8.18 (dd,  $J = 7.9$ , 1.4 Hz, 1H), 7.82 – 7.78 (m, 1H), 7.70 – 7.65 (m, 1H), 7.38 (d,  $J = 7.9$  Hz, 1H), 7.09 – 7.05 (m, 1H), 6.92 (t,  $J = 7.9$  Hz, 1H), 6.77 – 6.73 (m, 1H), 6.71 (dd,  $J = 7.8$ , 1.6 Hz, 1H), 6.58 (d,  $J = 7.5$  Hz, 1H), 6.53 (dd,  $J = 8.2$ , 2.6 Hz, 1H), 6.40 (t,  $J = 2.2$  Hz, 1H), 3.88 (t,  $J = 9.2$  Hz, 1H), 3.62 (s, 3H), 3.26 (dd,  $J = 10.7$ , 3.7 Hz, 1H), 3.14 – 3.07 (m, 1H), 2.59 – 2.53 (m, 1H);  $^{13}\text{C}\{^1\text{H}\}$  NMR (126 MHz,  $\text{CDCl}_3$ )  $\delta$  196.7, 158.7, 139.1, 134.8, 132.5, 131.6, 128.0, 127.6, 127.3, 127.1, 126.9, 126.4, 120.8, 113.7, 113.2, 55.1, 50.0, 48.0, 45.3, 27.95; **HRLCMS (ESI)**  $m/z$ :  $[\text{M}+\text{H}]^+$  calcd for  $\text{C}_{25}\text{H}_{20}\text{NO}_2\text{S}$ , 398.1209, found 398.1182.

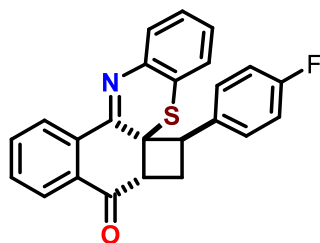

**6-(4-Fluorophenyl)-7,7a-dihydrobenzo[*a*]cyclobuta[*d*]phenothiazin-8(6*H*)-one (2l).** Light brown solid. Yield 278 mg (95% at 0.76 mmol scale), mp: 110 – 111 °C. Purified using EtOAc/hexane (20:80) as eluent.  $^1\text{H NMR}$  (500 MHz,  $\text{CDCl}_3$ )  $\delta$  8.70 (d,  $J = 8.0$  Hz, 1H), 8.18 (d,  $J = 7.8$  Hz, 1H), 7.79 (t,  $J = 7.8$  Hz, 1H), 7.67 (t,  $J = 7.6$  Hz, 1H), 7.34 (d,  $J = 7.8$  Hz, 1H), 7.07 (t,  $J = 7.7$  Hz, 1H), 6.92 – 6.85 (m, 2H), 6.76 (t,  $J = 7.7$  Hz, 1H), 6.68 – 6.59 (m, 3H), 3.89 (t,  $J = 9.5$  Hz, 1H), 3.21 (dd,  $J = 10.7$ , 3.5 Hz, 1H), 3.08 (q,  $J = 10.9$  Hz, 1H), 2.60 – 2.53 (m, 1H);  $^{13}\text{C}\{^1\text{H}\}$  NMR (126 MHz,  $\text{CDCl}_3$ )  $\delta$  196.6, 162.9, 160.9, 153.6, 144.1, 135.8, 134.8, 133.2 (d,  $J = 3.1$  Hz), 132.6, 131.7, 129.7 (d,  $J = 8.2$  Hz), 127.5, 127.4 (d,  $J = 2.2$  Hz), 127.1, 126.8, 126.6, 122.5, 113.9, 113.7, 49.2, 48.2, 45.1, 28.1;  $^{19}\text{F}\{^1\text{H}\}$  NMR (471 MHz,  $\text{CDCl}_3$ )  $\delta$  -115.61; **HRMS (ESI)**  $m/z$ :  $[\text{M}+\text{Na}]^+$  calcd for  $\text{C}_{24}\text{H}_{16}\text{FNOSNa}$ , 408.0829, found 408.0836.

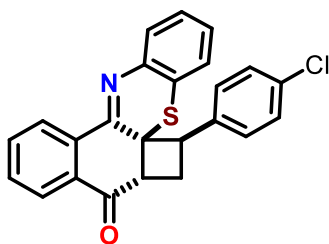

**6-(4-Chlorophenyl)-7,7a-dihydrobenzo[a]cyclobuta[d]phenothiazin-8(6H)-one (2m).**

Orange solid. Yield 290 mg (95% at 0.76 mmol scale), mp: 108 – 110 °C. Purified using EtOAc/hexane (20:80) as eluent.  $^1\text{H NMR}$  (500 MHz,  $\text{CDCl}_3$ )  $\delta$  8.70 (dd,  $J = 8.1, 1.2$  Hz, 1H), 8.18 (dd,  $J = 7.9, 1.4$  Hz, 1H), 7.82 – 7.78 (m, 1H), 7.70 – 7.65 (m, 1H), 7.34 (dd,  $J = 7.8, 1.3$  Hz, 1H), 7.12 – 7.07 (m, 1H), 6.92 – 6.87 (m, 2H), 6.86 – 6.82 (m, 2H), 6.81 – 6.77 (m, 1H), 6.65 (dd,  $J = 7.8, 1.4$  Hz, 1H), 3.88 (t,  $J = 9.3$  Hz, 1H), 3.25 – 3.19 (m, 1H), 3.12 – 3.05 (m, 1H), 2.59 – 2.54 (m, 1H);  $^{13}\text{C}\{^1\text{H}\}$  NMR (126 MHz,  $\text{CDCl}_3$ )  $\delta$  196.6, 153.6, 144.1, 135.9, 135.8, 134.9, 133.01, 132.5, 131.7, 129.4, 127.5, 127.4, 127.3, 127.2, 127.0, 126.7, 126.6, 122.4, 49.3, 48.2, 45.1, 27.8; HRMS (APCI)  $m/z$ :  $[\text{M}+\text{H}]^+$  calcd for  $\text{C}_{24}\text{H}_{17}\text{ClNOS}$ , 402.0714, found 402.0697.

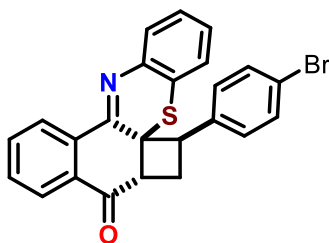

**6-(4-Bromophenyl)-7,7a-dihydrobenzo[a]cyclobuta[d]phenothiazin-8(6H)-one (2n).**

Brown solid. Yield 298 mg (88% at 0.76 mmol scale), mp: 121 – 123 °C. Purified using EtOAc/hexane (20:80) as eluent.  $^1\text{H NMR}$  (500 MHz,  $\text{CDCl}_3$ )  $\delta$  8.70 (d,  $J = 8.0$  Hz, 1H), 8.18 (d,  $J = 7.9$  Hz, 1H), 7.79 (t,  $J = 7.6$  Hz, 1H), 7.67 (t,  $J = 7.6$  Hz, 1H), 7.33 (d,  $J = 7.9$  Hz, 1H), 7.10 (t,  $J = 7.7$  Hz, 1H), 7.04 (d,  $J = 8.0$  Hz, 2H), 6.78 (t,  $J = 8.0$  Hz, 3H), 6.64 (d,  $J = 7.7$  Hz, 1H), 3.86 (t,  $J = 9.3$  Hz, 1H), 3.22 (dd,  $J = 10.8, 3.4$  Hz, 1H), 3.08 (q,  $J = 10.9$  Hz, 1H), 2.62 – 2.51 (m, 1H);  $^{13}\text{C}\{^1\text{H}\}$  NMR (126 MHz,  $\text{CDCl}_3$ )  $\delta$  196.6, 153.5, 144.1, 136.4, 135.8, 134.9, 132.5, 131.7, 130.0, 129.7, 127.5, 127.4, 127.3, 127.2, 126.7, 126.6, 122.4, 121.4, 49.3, 48.1, 45.1, 27.7; HRMS (ESI)  $m/z$ :  $[\text{M}+\text{Na}]^+$  calcd for  $\text{C}_{24}\text{H}_{16}\text{BrNOSNa}$ , 468.0028, found 468.0012.



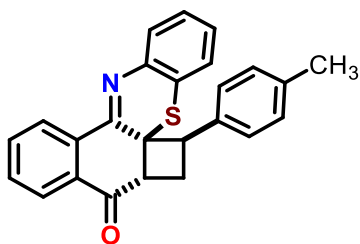

**6-(*p*-Tolyl)-7,7a-dihydrobenzo[*a*]cyclobuta[*d*]phenothiazin-8(6*H*)-one (2o).** Dirty yellow solid. Yield 272 mg (94% at 0.76 mmol scale), mp: 117 – 119 °C. Purified using EtOAc/hexane (20:80) as eluent.  $^1\text{H NMR}$  (500 MHz,  $\text{CDCl}_3$ )  $\delta$  8.71 (d,  $J = 8.0$  Hz, 1H), 8.18 (d,  $J = 7.8$  Hz, 1H), 7.79 (t,  $J = 7.6$  Hz, 1H), 7.67 (t,  $J = 7.5$  Hz, 1H), 7.35 (d,  $J = 7.9$  Hz, 1H), 7.06 (t,  $J = 7.6$  Hz, 1H), 6.81 – 6.70 (m, 5H), 6.63 (d,  $J = 7.8$  Hz, 1H), 3.87 (t,  $J = 9.2$  Hz, 1H), 3.25 (dd,  $J = 10.7, 3.7$  Hz, 1H), 3.14 – 3.06 (m, 1H), 2.59 – 2.52 (m, 1H), 2.16 (s, 3H);  $^{13}\text{C}\{^1\text{H}\}$  NMR (126 MHz,  $\text{CDCl}_3$ )  $\delta$  196.9, 153.8, 144.2, 136.7, 136.0, 134.7, 134.4, 132.5, 131.6, 128.0, 127.7, 127.5, 127.33, 127.29, 127.1, 126.4, 126.3, 122.7, 49.6, 48.3, 45.3, 28.0, 20.9; HRMS (APCI)  $m/z$ :  $[\text{M}]^+$  calcd for  $\text{C}_{25}\text{H}_{19}\text{NOS}$ , 381.1182, found 381.1197.

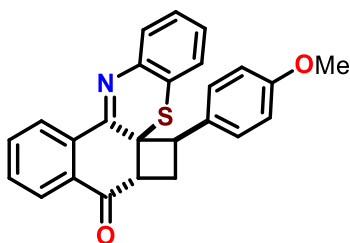

**6-(4-Methoxyphenyl)-7,7a-dihydrobenzo[*a*]cyclobuta[*d*]phenothiazin-8(6*H*)-one (2p).** Orange solid. Yield 290 mg (96% at 0.76 mmol scale), mp: 127 – 129 °C. Purified using EtOAc/hexane (20:80) as eluent.  $^1\text{H NMR}$  (500 MHz,  $\text{CDCl}_3$ )  $\delta$  8.71 (d,  $J = 8.1$  Hz, 1H), 8.18 (d,  $J = 7.9$  Hz, 1H), 7.79 (t,  $J = 7.7$  Hz, 1H), 7.67 (t,  $J = 7.6$  Hz, 1H), 7.35 (d,  $J = 8.0$  Hz, 1H), 7.06 (t,  $J = 7.6$  Hz, 1H), 6.84 (d,  $J = 8.3$  Hz, 2H), 6.77 – 6.65 (m, 2H), 6.49 (d,  $J = 8.2$  Hz, 2H), 3.86 (t,  $J = 9.3$  Hz, 1H), 3.69 (s, 3H), 3.28 – 3.17 (m, 1H), 3.08 (q,  $J = 10.9$  Hz, 1H), 2.61 – 2.50 (m, 1H);  $^{13}\text{C}\{^1\text{H}\}$  NMR (126 MHz,  $\text{CDCl}_3$ )  $\delta$  196.9, 158.6, 153.8, 144.2, 135.9, 134.8, 132.5, 131.6, 129.8, 129.2, 127.5, 127.3, 127.1, 126.6, 126.4, 122.8, 112.5, 55.2, 49.3, 48.4, 45.1, 28.2; HRLCMS (APCI)  $m/z$ :  $[\text{M}-\text{H}]^+$  calcd for  $\text{C}_{25}\text{H}_{18}\text{NO}_2\text{S}$ , 396.1053, found 396.1083.

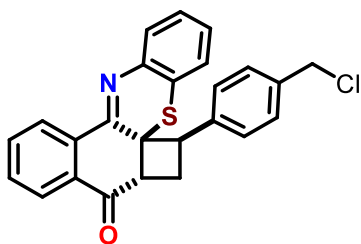

**6-(4-(Chloromethyl)phenyl)-7,7a-dihydrobenzo[*a*]cyclobuta[*d*]phenothiazin-8(6*H*)-one (2q).** Bright yellow solid. Yield 300 mg (95% at 0.76 mmol scale), mp: 121 – 123 °C. Purified using EtOAc/hexane (20:80) as eluent.  $^1\text{H NMR}$  (500 MHz,  $\text{CDCl}_3$ )  $\delta$  8.71 (dd,  $J = 8.1, 1.3$  Hz, 1H), 8.19 (dd,  $J = 7.9, 1.5$  Hz, 1H), 7.82 – 7.78 (m, 1H), 7.70 – 7.65 (m, 1H), 7.34 (dd,  $J = 8.0, 1.4$  Hz, 1H), 7.07 – 7.04 (m, 1H), 6.96 (d,  $J = 8.1$  Hz, 2H), 6.91 (d,  $J = 8.3$  Hz, 2H), 6.73 – 6.69 (m, 1H), 6.61 (dd,  $J = 7.8, 1.4$  Hz, 1H), 4.40 (s, 2H), 3.91 (t,  $J = 9.3$  Hz, 1H), 3.26 – 3.21 (m, 1H), 3.17 – 3.10 (m, 1H), 2.59 – 2.53 (m, 1H);  $^{13}\text{C}\{^1\text{H}\}$  NMR (126 MHz,  $\text{CDCl}_3$ )  $\delta$  196.7, 153.6, 144.1, 137.8, 136.0, 135.8, 134.8, 132.5, 131.6, 128.5, 127.5, 127.4, 127.3, 127.23, 127.17, 126.5, 122.4, 49.6, 48.1, 46.0, 45.1, 27.7; HRLCMS (ESI)  $m/z$ :  $[\text{M}+\text{H}]^+$  calcd for  $\text{C}_{25}\text{H}_{19}\text{ClNOS}$ , 416.0870, found 416.0857.

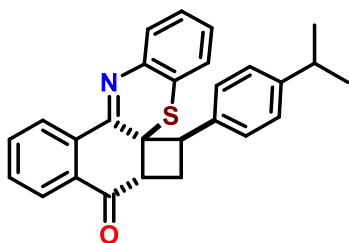

**6-(4-Isopropylphenyl)-7,7a-dihydrobenzo[*a*]cyclobuta[*d*]phenothiazin-8(6*H*)-one (2r).** Red solid. Yield 295 mg (95% at 0.76 mmol scale), mp: 100 – 102 °C. Purified using EtOAc/hexane (20:80) as eluent.  $^1\text{H NMR}$  (500 MHz,  $\text{CDCl}_3$ )  $\delta$  8.71 (d,  $J = 8.0$  Hz, 1H), 8.19 (d,  $J = 7.7$  Hz, 1H), 7.79 (t,  $J = 7.6$  Hz, 1H), 7.67 (t,  $J = 7.5$  Hz, 1H), 7.33 (d,  $J = 7.9$  Hz, 1H), 7.02 (t,  $J = 7.5$  Hz, 1H), 6.86 (d,  $J = 8.0$  Hz, 2H), 6.79 (d,  $J = 7.9$  Hz, 2H), 6.63 (dd,  $J = 16.2, 7.4$  Hz, 2H), 3.90 (t,  $J = 9.2$  Hz, 1H), 3.21 (dd,  $J = 10.6, 2.4$  Hz, 1H), 3.14 (q,  $J = 10.5$  Hz, 1H), 2.76 – 2.66 (m, 1H), 2.57 – 2.50 (m, 1H), 1.12 (d,  $J = 6.9$  Hz, 6H);  $^{13}\text{C}\{^1\text{H}\}$  NMR (126 MHz,  $\text{CDCl}_3$ )  $\delta$  197.0, 153.7, 147.6, 144.2, 135.9, 134.8, 134.76, 132.6, 131.5, 128.1, 127.5, 127.3, 127.0, 126.8, 126.2, 125.0, 122.8, 49.7, 48.3, 45.2, 33.7, 27.9, 23.9, 23.7; HRLCMS (ESI)  $m/z$ :  $[\text{M}+\text{H}]^+$  calcd for  $\text{C}_{27}\text{H}_{24}\text{NOS}$ , 410.1573, found 410.1561.

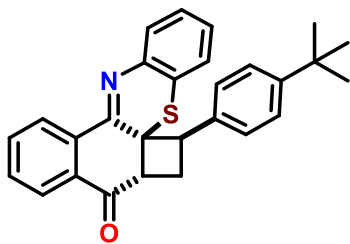

**6-(4-(Tert-butyl) phenyl)-7,7a-dihydrobenzo[a]cyclobuta[d]phenothiazin-8(6H)-one (2s).**

Greenish solid. Yield 299 mg (93% at 0.76 mmol scale), mp: 131 – 133 °C. Purified using EtOAc/hexane (20:80) as eluent.  $^1\text{H NMR}$  (500 MHz,  $\text{CDCl}_3$ )  $\delta$  8.72 (d,  $J = 8.0$  Hz, 1H), 8.19 (d,  $J = 7.8$  Hz, 1H), 7.79 (d,  $J = 7.3$  Hz, 1H), 7.67 (t,  $J = 7.5$  Hz, 1H), 7.32 (d,  $J = 7.9$  Hz, 1H), 7.01 (d,  $J = 7.0$  Hz, 1H), 6.95 (d,  $J = 8.2$  Hz, 2H), 6.87 (d,  $J = 8.2$  Hz, 2H), 6.62 (dd,  $J = 14.9, 7.3$  Hz, 2H), 3.90 (d,  $J = 8.7$  Hz, 1H), 3.22 – 3.12 (m, 2H), 2.53 (s, 1H), 1.19 (s, 9H);  $^{13}\text{C}\{^1\text{H}\}$  NMR (126 MHz,  $\text{CDCl}_3$ )  $\delta$  197.0, 153.7, 149.7, 144.3, 135.9, 134.8, 134.4, 132.7, 131.6, 127.9, 127.5, 127.3, 127.0, 126.8, 126.2, 123.8, 122.8, 49.6, 48.4, 45.2, 34.3, 31.1, 27.8; HRLCMS (ESI)  $m/z$ :  $[\text{M}+\text{Na}]^+$  calcd for  $\text{C}_{28}\text{H}_{25}\text{NOSNa}$ , 446.1549, found 446.1535.

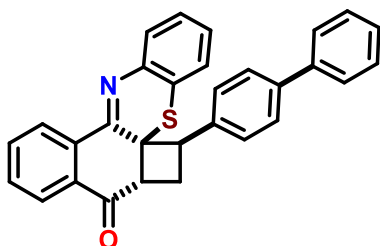

**6-([1,1'-Biphenyl]-4-yl)-7,7a-dihydrobenzo[a]cyclobuta[d]phenothiazin-8(6H)-one (2t).**

Orange solid. Yield 316 mg (94% at 0.76 mmol scale), mp: 123 – 125 °C. Purified using EtOAc/hexane (20:80) as eluent.  $^1\text{H NMR}$  (500 MHz,  $\text{CDCl}_3$ )  $\delta$  8.73 (d,  $J = 8.0$  Hz, 1H), 8.21 (d,  $J = 7.8$  Hz, 1H), 7.83 – 7.78 (m, 1H), 7.69 (t,  $J = 7.5$  Hz, 1H), 7.42 (d,  $J = 4.4$  Hz, 4H), 7.38 – 7.31 (m, 2H), 7.15 (d,  $J = 7.8$  Hz, 2H), 7.09 – 7.04 (m, 1H), 6.99 (d,  $J = 7.9$  Hz, 2H), 6.68 – 6.58 (m, 2H), 3.97 (t,  $J = 9.2$  Hz, 1H), 3.26 (dd,  $J = 10.7, 2.9$  Hz, 1H), 3.23 – 3.16 (m, 1H), 2.64 – 2.56 (m, 1H);  $^{13}\text{C}\{^1\text{H}\}$  NMR (126 MHz,  $\text{CDCl}_3$ )  $\delta$  196.8, 153.8, 144.3, 141.0, 139.9, 136.5, 135.9, 134.8, 132.6, 131.6, 128.7, 128.5, 127.6, 127.4, 127.3, 127.2, 127.1, 127.0, 126.5, 126.4, 125.7, 122.7, 49.7, 48.5, 45.2, 27.8; HRLCMS (ESI)  $m/z$ :  $[\text{M}+\text{H}]^+$  calcd for  $\text{C}_{30}\text{H}_{22}\text{NOS}$ , 444.1417, found 444.1398.

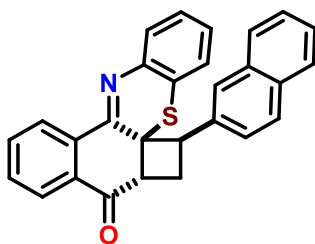

**6-(Naphthalen-2-yl)-7,7a-dihydrobenzo[a]cyclobuta[d]phenothiazin-8(6H)-one (2u).**

Greenish-yellow solid. Yield 269 mg (85% at 0.76 mmol scale), mp: 121 – 123 °C. Purified using EtOAc/hexane (20:80) as eluent.;  $^1\text{H NMR}$  (400 MHz,  $\text{CDCl}_3$ )  $\delta$  8.75 (dd,  $J = 8.1, 1.3$  Hz, 1H), 8.21 (dd,  $J = 7.9, 1.4$  Hz, 1H), 7.85 – 7.79 (m, 1H), 7.72 – 7.61 (m, 3H), 7.45 (d,  $J = 1.8$  Hz, 1H), 7.41 – 7.32 (m, 4H), 6.94 – 6.87 (m, 2H), 6.41 – 6.34 (m, 2H), 4.08 (t,  $J = 8.7$  Hz, 1H), 3.35 – 3.23 (m, 2H), 2.71 – 2.62 (m, 1H);  $^{13}\text{C}\{^1\text{H}\}$  NMR (126 MHz,  $\text{CDCl}_3$ )  $\delta$  196.8, 153.8, 144.1, 135.9, 134.9, 134.8, 132.6, 132.5, 132.48, 131.6, 127.8, 127.6, 127.4, 127.2, 127.1, 126.9, 126.5, 126.4, 126.3, 125.6, 122.4, 50.1, 48.4, 45.3, 27.8; HRLCMS (ESI)  $m/z$ :  $[\text{M}+\text{Na}]^+$  calcd for  $\text{C}_{28}\text{H}_{19}\text{NOSNa}$ , 440.1080, found 440.1071.

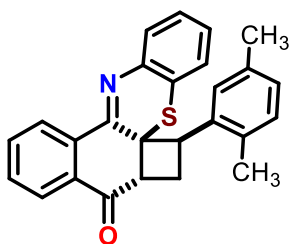

**6-(2,5-Dimethylphenyl)-7,7a-dihydrobenzo[a]cyclobuta[d]phenothiazin-8(6H)-one (2v).**

Pinkish brown solid. Yield 249 mg (83% at 0.76 mmol scale), mp: 148 – 150 °C. Purified using EtOAc/hexane (20:80) as eluent.  $^1\text{H NMR}$  (500 MHz,  $\text{CDCl}_3$ )  $\delta$  8.69 (dd,  $J = 8.1, 1.3$  Hz, 1H), 8.20 (dd,  $J = 7.8, 1.4$  Hz, 1H), 7.81 – 7.77 (m, 1H), 7.70 – 7.66 (m, 1H), 7.34 – 7.31 (m, 1H), 7.28 (d,  $J = 1.8$  Hz, 1H), 7.03 – 6.98 (m, 1H), 6.71 – 6.63 (m, 3H), 6.46 (d,  $J = 7.6$  Hz, 1H), 4.19 (t,  $J = 9.4$  Hz, 1H), 3.24 – 3.20 (m, 1H), 3.17 – 3.10 (m, 1H), 2.55 – 2.50 (m, 1H), 2.35 (s, 3H), 1.76 (s, 3H);  $^{13}\text{C}\{^1\text{H}\}$  NMR (126 MHz,  $\text{CDCl}_3$ )  $\delta$  197.2, 154.0, 143.9, 136.0, 135.6, 134.8, 134.0, 133.0, 132.8, 131.6, 129.1, 128.3, 127.64, 127.58, 127.3, 127.1, 126.9, 126.7, 126.3, 122.8, 48.4, 45.4, 44.9, 28.7, 21.2, 18.7; HRLCMS (ESI)  $m/z$ :  $[\text{M}+\text{H}]^+$  calcd for  $\text{C}_{26}\text{H}_{22}\text{NOS}$ , 396.1417, found 396.1391.

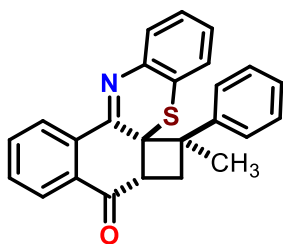

**6-Methyl-6-phenyl-7,7a-dihydrobenzo[*a*]cyclobuta[*d*]phenothiazin-8(6*H*)-one** (2w).

Orange solid. Yield 156 mg (54% at 0.76 mmol scale), mp: 128 – 130 °C. Purified using EtOAc/hexane (20:80) as eluent.  $^1\text{H NMR}$  (500 MHz,  $\text{CDCl}_3$ )  $\delta$  8.71 (d,  $J = 8.0$  Hz, 1H), 8.15 (d,  $J = 7.8$  Hz, 1H), 7.78 (t,  $J = 7.7$  Hz, 1H), 7.66 (t,  $J = 7.5$  Hz, 1H), 7.48 (d,  $J = 7.9$  Hz, 1H), 7.18 (t,  $J = 7.6$  Hz, 1H), 7.05 – 7.01 (m, 3H), 6.93 – 6.89 (m, 2H), 6.79 (t,  $J = 7.5$  Hz, 1H), 6.62 (d,  $J = 7.7$  Hz, 1H), 3.42 (t,  $J = 11.6$  Hz, 1H), 3.29 (dd,  $J = 10.9, 5.3$  Hz, 1H), 2.28 (dd,  $J = 12.4, 5.3$  Hz, 1H), 1.43 (s, 3H);  $^{13}\text{C}\{^1\text{H}\}$  NMR (126 MHz,  $\text{CDCl}_3$ )  $\delta$  197.0, 151.8, 144.7, 142.1, 137.5, 134.6, 132.3, 131.5, 127.32, 127.30, 126.94, 126.92, 126.91, 126.7, 126.6, 122.8, 52.1, 49.5, 44.0, 35.6, 25.8; HRMS (ESI)  $m/z$ :  $[\text{M}-\text{H}]^+$  calcd for  $\text{C}_{25}\text{H}_{18}\text{NOS}$ , 380.1104, found 380.1101.

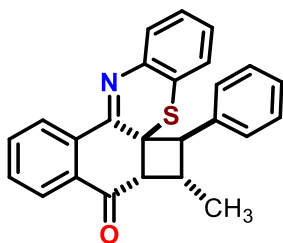

**7-Methyl-6-phenyl-7,7a-dihydrobenzo[*a*]cyclobuta[*d*]phenothiazin-8(6*H*)-one** (2x).

Orange solid. Yield 168 mg (58% at 0.76 mmol scale), mp: 92 – 94 °C. Purified using EtOAc/hexane (20:80) as eluent.  $^1\text{H NMR}$  (500 MHz,  $\text{CDCl}_3$ )  $\delta$  8.77 (dd,  $J = 8.1, 1.3$  Hz, 1H), 8.24 (dd,  $J = 7.9, 1.4$  Hz, 1H), 7.82 – 7.78 (m, 1H), 7.70 – 7.65 (m, 1H), 7.33 (dd,  $J = 7.9, 1.4$  Hz, 1H), 7.04 – 7.00 (m, 1H), 6.98 – 6.94 (m, 5H), 6.70 – 6.66 (m, 1H), 6.62 (dd,  $J = 7.8, 1.5$  Hz, 1H), 3.52 – 3.46 (m, 2H), 3.33 – 3.27 (m, 1H), 1.10 – 1.05 (m, 3H);  $^{13}\text{C}\{^1\text{H}\}$  NMR (126 MHz,  $\text{CDCl}_3$ )  $\delta$  194.4, 154.2, 143.9, 137.0, 135.8, 134.8, 133.3, 131.5, 128.2, 127.7, 127.6, 127.2, 127.1, 127.0, 126.9, 126.8, 126.3, 122.7, 58.3, 49.4, 45.1, 34.5, 16.4; HRLCMS (ESI)  $m/z$ :  $[\text{M}+\text{H}]^+$  calcd for  $\text{C}_{25}\text{H}_{20}\text{NOS}$ , 382.1260, found 382.1235.

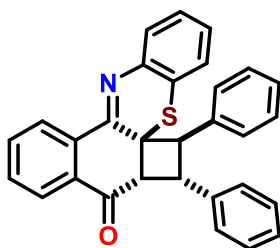

**6,7-Diphenyl-7,7a-dihydrobenzo[*a*]cyclobuta[*d*]phenothiazin-8(6*H*)-one (2y).** Brown solid. Yield 101 mg (30% at 0.76 mmol scale), mp: 150 – 152 °C. Purified using EtOAc/hexane (20:80) as eluent.  $^1\text{H NMR}$  (400 MHz,  $\text{CDCl}_3$ )  $\delta$  8.83 (s, 1H), 8.05 (s, 1H), 7.83 (s, 1H), 7.65 (s, 1H), 7.40 (s, 1H), 7.24 (s, 3H), 7.15 (s, 2H), 7.07 (s, 3H), 6.96 (s, 3H), 6.73 (s, 2H), 4.72 (s, 1H), 4.36 (d,  $J = 11.4$  Hz, 1H), 3.67 (d,  $J = 11.3$  Hz, 1H);  $^{13}\text{C}\{^1\text{H}\}$  NMR (126 MHz,  $\text{CDCl}_3$ )  $\delta$  192.9, 153.9, 143.7, 136.5, 136.4, 135.7, 134.7, 133.6, 131.6, 128.4, 128.2, 128.1, 128.0, 127.7, 127.41, 127.37, 127.2, 127.1, 126.8, 126.5, 122.5, 54.9, 52.1, 45.2, 44.0; **HRLCMS (ESI)**  $m/z$ :  $[\text{M}+\text{H}]^+$  calcd for  $\text{C}_{30}\text{H}_{22}\text{NOS}$ , 444.1395, found 444.1417.

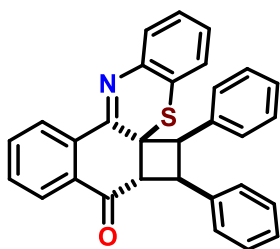

**6,7-Diphenyl-7,7a-dihydrobenzo[*a*]cyclobuta[*d*]phenothiazin-8(6*H*)-one (2z).** Trace amount realized. **HRLCMS (ESI)**  $m/z$ :  $[\text{M}+\text{H}]^+$  calcd for  $\text{C}_{30}\text{H}_{22}\text{NOS}$ , 444.1392, found 444.1417.

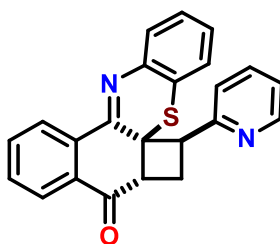

**6-(Pyridin-2-yl)-7,7a-dihydrobenzo[*a*]cyclobuta[*d*]phenothiazin-8(6*H*)-one (2aa).** Orange solid, trace amount of compound. **HRLCMS (ESI)**  $m/z$ :  $[\text{M}+\text{H}]^+$  calcd for  $\text{C}_{23}\text{H}_{17}\text{N}_2\text{OS}$ , 369.1056, found 369.1030.

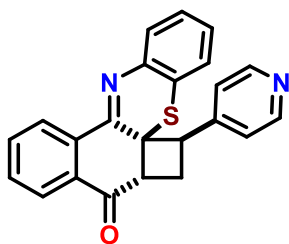

**6-(Pyridin-4-yl)-7,7a-dihydrobenzo[a]cyclobuta[d]phenothiazin-8(6H)-one (2ab).** Orange solid, trace amount of compound. **HRLCMS (ESI)  $m/z$ :**  $[M+H]^+$  calcd for  $C_{23}H_{17}N_2OS$ , 369.1056, found 369.1048.

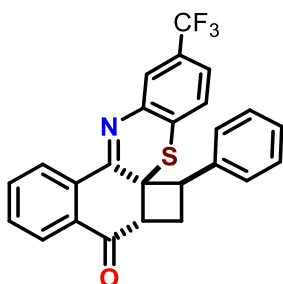

**6-Phenyl-2-(trifluoromethyl)-7,7a-dihydrobenzo[a]cyclobuta[d]phenothiazin-8(6H)-one (2ac).** Yellow solid. Yield 237 mg (90% at 0.60 mmol scale), mp: 86 – 88 °C. Purified using EtOAc/hexane (20:80) as eluent.  **$^1H$  NMR (400 MHz,  $CDCl_3$ )**  $\delta$  8.70 (d,  $J = 8.1$  Hz, 1H), 8.21 (d,  $J = 7.9$  Hz, 1H), 7.82 (t,  $J = 7.6$  Hz, 1H), 7.71 (t,  $J = 7.5$  Hz, 1H), 7.59 (s, 1H), 7.00 – 6.88 (m, 6H), 6.74 (d,  $J = 8.2$  Hz, 1H), 3.94 (t,  $J = 9.2$  Hz, 1H), 3.27 – 3.12 (m, 2H), 2.56 (t,  $J = 10.2$  Hz, 1H);  **$^{13}C\{^1H\}$  NMR (101 MHz,  $CDCl_3$ )**  $\delta$  196.3, 155.2, 144.2, 137.0, 135.3, 134.9, 132.8, 132.2, 128.9, 128.6, 128.2, 127.7, 127.6, 127.4 (d,  $J = 5.5$  Hz), 127.1, 125.2, 123.9 (d,  $J = 3.9$  Hz), 122.7 (d,  $J = 4.0$  Hz), 122.5, 50.1, 48.3, 45.0, 27.5;  **$^{19}F$  NMR (471 MHz,  $CDCl_3$ )**  $\delta$  -62.64; **HRLCMS (ESI)  $m/z$ :**  $[M+H]^+$  calcd for  $C_{25}H_{17}F_3NOS$ , 436.0977, found 436.0970.

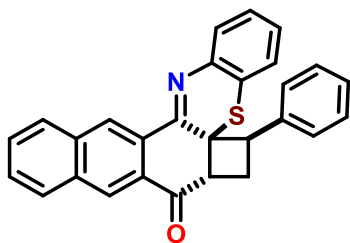

**6-Phenyl-7,7a-dihydrocyclobuta[d]naphtho[2,3-a]phenothiazin-8(6H)-one (2ad).** Pale yellow solid. Yield 184 mg (69% at 0.64 mmol scale), mp: 140 – 142 °C. Purified using EtOAc/hexane (15:85) as eluent.  **$^1H$  NMR (400 MHz,  $CDCl_3$ )**  $\delta$  9.24 (s, 1H), 8.76 (s, 1H),

8.08 (t,  $J = 8.1$  Hz, 2H), 7.70 – 7.61 (m, 2H), 7.44 (d,  $J = 7.9$  Hz, 1H), 7.11 – 7.06 (m, 1H), 7.00 – 6.92 (m, 5H), 6.73 (t,  $J = 7.6$  Hz, 1H), 6.69 – 6.63 (m, 1H), 3.93 (t,  $J = 9.1$  Hz, 1H), 3.36 (dd,  $J = 10.8, 4.0$  Hz, 1H), 3.20 – 3.11 (m, 1H), 2.65 – 2.57 (m, 1H);  $^{13}\text{C}\{^1\text{H}\}$  NMR (101 MHz,  $\text{CDCl}_3$ )  $\delta$  197.0, 154.0, 144.3, 137.6, 136.2, 134.0, 131.2, 130.0, 129.45, 129.38, 129.36, 129.3, 128.5, 128.4, 128.2, 127.2, 127.17, 127.1, 127.06, 126.6, 126.4, 122.6, 50.0, 48.3, 45.6, 28.0; HRLCMS (ESI)  $m/z$ :  $[\text{M}+\text{H}]^+$  calcd for  $\text{C}_{28}\text{H}_{20}\text{NOS}$ , 418.1260, found 418.1250.

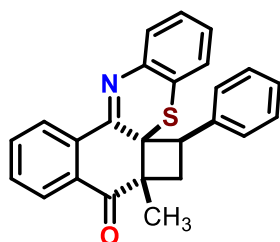

**7a-Methyl-6-phenyl-7,7a-dihydrobenzo[*a*]cyclobuta[*d*]phenothiazin-8(6*H*)-one (2ae).**

Yellow solid. Yield 58 mg (20% at 0.76 mmol scale), mp: 142 – 144 °C. Purified using EtOAc/hexane (20:80) as eluent.  $^1\text{H}$  NMR (400 MHz,  $\text{CDCl}_3$ )  $\delta$  8.78 (d,  $J = 8.1$  Hz, 1H), 8.19 (d,  $J = 7.8$  Hz, 1H), 7.85 (t,  $J = 7.6$  Hz, 1H), 7.73 (t,  $J = 7.5$  Hz, 1H), 7.46 (d,  $J = 7.9$  Hz, 1H), 7.03 (q,  $J = 4.1$  Hz, 1H), 6.98 (s, 2H), 6.95 – 6.89 (m, 3H), 6.68 (d,  $J = 4.3$  Hz, 2H), 3.79 – 3.73 (m, 1H), 2.83 (t,  $J = 11.3$  Hz, 1H), 2.77 – 2.72 (m, 1H), 1.50 (d,  $J = 1.4$  Hz, 3H);  $^{13}\text{C}\{^1\text{H}\}$  NMR (126 MHz,  $\text{CDCl}_3$ )  $\delta$  200.8, 153.0, 143.0, 136.8, 134.9, 134.8, 132.4, 132.1, 128.2, 128.0, 127.7, 127.5, 127.2, 127.13, 127.06, 126.9, 126.3, 123.1, 54.1, 49.2, 48.5, 33.6, 21.0; HRLCMS (ESI)  $m/z$ :  $[\text{M}+\text{H}]^+$  calcd for  $\text{C}_{25}\text{H}_{20}\text{NOS}$ , 382.1248, found 382.1260.

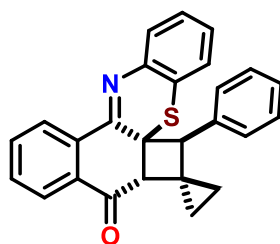

**6-Phenyl-6*H*-spiro[benzo[*a*]cyclobuta[*d*]phenothiazine-7,1'-cyclopropan]-8(7*aH*)-one (2af).**

Greenish-yellow solid. Yield 149 mg (50% at 0.76 mmol scale), mp: 130 – 132 °C. Purified using EtOAc/hexane (20:80) as eluent.  $^1\text{H}$  NMR (400 MHz,  $\text{CDCl}_3$ )  $\delta$  8.88 (d,  $J = 8.0$  Hz, 1H), 8.18 (d,  $J = 7.8$  Hz, 1H), 7.85 (t,  $J = 7.6$  Hz, 1H), 7.72 (t,  $J = 7.5$  Hz, 1H), 7.59 (d,  $J = 7.9$  Hz, 1H), 7.19 (t,  $J = 7.6$  Hz, 1H), 7.10 (d,  $J = 6.7$  Hz, 3H), 6.89 (d,  $J = 6.9$  Hz, 2H), 6.81 (t,  $J = 7.6$  Hz, 1H), 6.63 (d,  $J = 7.8$  Hz, 1H), 3.74 (s, 1H), 3.69 (s, 1H), 0.90 – 0.85 (m, 1H), 0.72 – 0.64 (m, 2H), 0.45 – 0.39 (m, 1H);  $^{13}\text{C}\{^1\text{H}\}$  NMR (126 MHz,  $\text{CDCl}_3$ )  $\delta$  193.3,



155.8, 143.7, 137.0, 134.9, 134.8, 132.2, 130.1, 128.1, 127.32, 127.27, 127.03, 127.00, 126.9, 126.8, 126.7, 122.7, 58.0, 51.4, 44.3, 24.7, 11.3, 10.8; **HRLCMS (ESI)  $m/z$** :  $[M+H]^+$  calcd for  $C_{26}H_{20}NOS$ , 394.1258, found 394.1260.

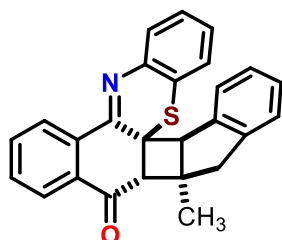

**10b-Methyl-10a,10b,11,15b-tetrahydro-10H-benzo[*a*]indeno[1',2':3,4]cyclobuta[1,2-*d*]phenothiazin-10-one (2ag).** Yellow solid. Yield 45 mg (15% at 0.76 mmol scale), mp: 130 – 132 °C. Purified using EtOAc/hexane (20:80) as eluent.  **$^1H$  NMR (700 MHz,  $CDCl_3$ )**  $\delta$  8.84 – 8.77 (m, 1H), 8.19 (d,  $J = 7.7$  Hz, 1H), 7.83 – 7.68 (m, 3H), 7.39 (s, 1H), 7.26 (d,  $J = 7.4$  Hz, 2H), 7.21 (t,  $J = 7.5$  Hz, 1H), 7.16 (d,  $J = 7.8$  Hz, 1H), 7.01 (t,  $J = 7.3$  Hz, 1H), 5.95 (d,  $J = 7.6$  Hz, 1H), 3.58 (s, 1H), 3.44 (d,  $J = 16.7$  Hz, 1H), 3.36 (s, 1H), 2.98 (d,  $J = 16.7$  Hz, 1H), 1.21 (s, 3H);  **$^{13}C\{^1H\}$  NMR (176 MHz,  $CDCl_3$ )**  $\delta$  194.2, 153.8, 144.3, 143.8, 139.6, 135.7, 134.8, 132.9, 132.0, 128.2, 127.9, 127.6, 127.4, 127.0, 126.88, 126.86, 126.2, 124.9, 123.0, 62.1, 55.4, 50.3, 46.6, 43.5, 22.5; **HRLCMS (ESI)  $m/z$** :  $[M+H]^+$  calcd for  $C_{26}H_{20}NOS$ , 394.1280, found 394.1260.

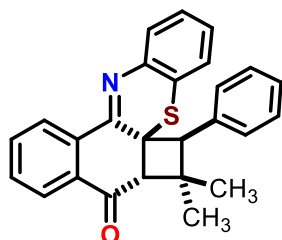

**7,7-Dimethyl-6-phenyl-7,7a-dihydrobenzo[*a*]cyclobuta[*d*]phenothiazin-8(6H)-one (2ah).** Trace amount realized. **HRLCMS (APCI)  $m/z$** :  $[M+H]^+$  calcd for  $C_{26}H_{22}NOS$ , 396.1443, found 396.1417.

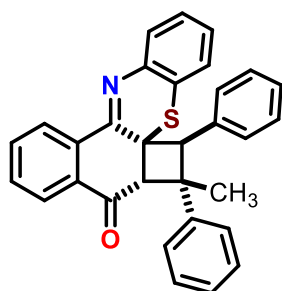

**7-Methyl-6,7-diphenyl-7,7a-dihydrobenzo[*a*]cyclobuta[*d*]phenothiazin-8(6*H*)-one (2ai).**

Trace amount realized. **HRLCMS (ESI) *m/z*:** [M-H]<sup>+</sup> calcd for C<sub>31</sub>H<sub>22</sub>NOS, 456.1412, found 456.1417.

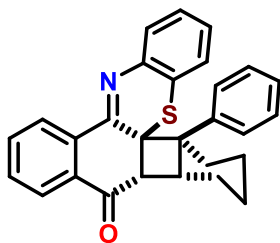

**5b-Phenyl-6,7,8,9,9a,9b-hexahydrobenzo[*a*]benzo[3,4]cyclobuta[1,2-*d*]phenothiazin-10(5*bH*)-one (2aj).** Trace amount realized. **HRLCMS (ESI-QTOF) *m/z*:** [M+H]<sup>+</sup> calcd for C<sub>28</sub>H<sub>24</sub>NOS, 422.1573, found 422.1572.

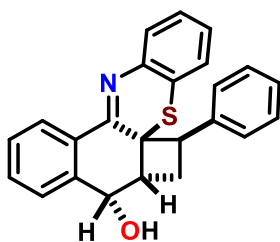

**6-Phenyl-6,7,7a,8-tetrahydrobenzo[*a*]cyclobuta[*d*]phenothiazin-8-ol (2ak).** Pink solid. Yield 249 mg (89% at 0.76 mmol scale), mp: 123 – 125 °C. Purified using EtOAc/hexane (35:65) as eluent. **<sup>1</sup>H NMR (400 MHz, CDCl<sub>3</sub>)** δ 8.57 (d, *J* = 7.8 Hz, 1H), 7.77 (d, *J* = 7.7 Hz, 1H), 7.61 (t, *J* = 7.5 Hz, 1H), 7.54 (dd, *J* = 14.0, 7.8 Hz, 2H), 7.23 (t, *J* = 7.5 Hz, 1H), 7.16 (d, *J* = 6.6 Hz, 3H), 6.95 (t, *J* = 7.5 Hz, 1H), 6.80 – 6.71 (m, 3H), 5.11 (d, *J* = 5.4 Hz, 1H), 3.40 – 3.30 (m, 2H), 2.38 – 2.30 (m, 1H), 2.23 (t, *J* = 11.2 Hz, 1H); **<sup>13</sup>C{<sup>1</sup>H} NMR (101 MHz, CDCl<sub>3</sub>)** δ 157.6, 143.7, 139.8, 138.7, 131.6, 131.2, 128.7, 127.9, 127.7, 127.3, 127.2, 126.9, 126.3, 125.4, 122.3, 66.3, 49.4, 45.2, 40.5, 22.3; **HRLCMS (ESI) *m/z*:** [M+H]<sup>+</sup> calcd for C<sub>24</sub>H<sub>20</sub>NOS, 370.1260, found 370.1268.

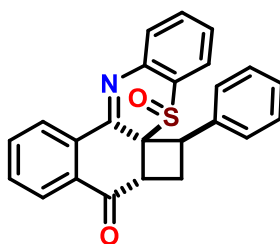

**6-Phenyl-7,7a-dihydrobenzo[*a*]cyclobuta[*d*]phenothiazin-8(6*H*)-one 5-oxide (2al).** Light yellow solid. Yield 227 mg (78% at 0.76 mmol scale), mp: 173 – 175 °C. Purified by precipitation technique using pentane. <sup>1</sup>H NMR (500 MHz, CDCl<sub>3</sub>) δ 8.80 (d, *J* = 8.2 Hz, 1H), 8.22 (d, *J* = 7.8 Hz, 1H), 7.81 (t, *J* = 7.9 Hz, 1H), 7.71 (t, *J* = 7.5 Hz, 1H), 7.60 (d, *J* = 7.8 Hz, 1H), 7.46 (s, 1H), 6.93 (s, 5H), 6.81 (d, *J* = 7.1 Hz, 2H), 4.18 – 4.02 (m, 2H), 3.53 (d, *J* = 11.4 Hz, 1H), 2.79 (t, *J* = 10.7 Hz, 1H); <sup>13</sup>C{<sup>1</sup>H} NMR (126 MHz, CDCl<sub>3</sub>) δ 196.2, 156.9, 140.7, 137.1, 135.8, 134.8, 134.0, 132.7, 132.5, 130.5, 128.5, 128.4, 127.9, 127.8, 127.4, 127.2, 127.0, 123.6, 62.6, 48.9, 40.2, 27.7; HRLCMS (ESI) *m/z*: [M+Na]<sup>+</sup> calcd for C<sub>24</sub>H<sub>17</sub>NO<sub>2</sub>SNa, 406.0872, found 406.0895.

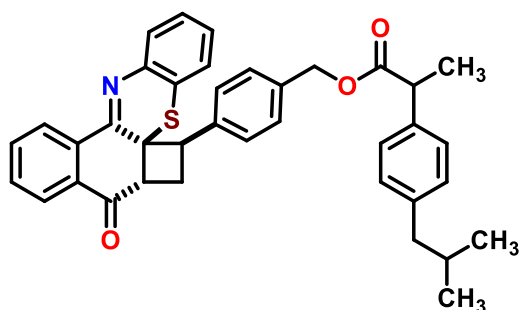

**4-(8-Oxo-6,7,7a,8-tetrahydrobenzo[*a*]cyclobuta[*d*]phenothiazin-6-yl) benzyl 2-(4-isobutyl- phenyl) propanoate (2am).** Ibuprofen coupled cyclobutylated phenothiazine **2ae** was prepared by the [2+2] photo-cycloaddition reaction between **1a** and 4-vinylbenzyl 2-(4-isobutylphenyl) propanoate (synthesized by following reported procedure)<sup>1a</sup> using standard reaction conditions. Brownish thick liquid. Yield 289 mg (65% at 0.76 mmol scale), mp: 101 – 103 °C. Purified using CH<sub>2</sub>Cl<sub>2</sub> solvent as eluent. <sup>1</sup>H NMR (400 MHz, CDCl<sub>3</sub>) δ 8.71 (d, *J* = 8.0 Hz, 1H), 8.19 (dd, *J* = 7.9, 1.4 Hz, 1H), 7.82 – 7.76 (m, 1H), 7.69 – 7.64 (m, 1H), 7.34 – 7.30 (m, 1H), 7.24 – 7.20 (m, 2H), 7.12 (dd, *J* = 8.2, 2.1 Hz, 2H), 7.00 (q, *J* = 7.3 Hz, 1H), 6.87 – 6.79 (m, 4H), 6.62 – 6.57 (m, 1H), 6.54 – 6.49 (m, 1H), 4.92 (d, *J* = 2.5 Hz, 2H), 3.89 (t, *J* = 9.3 Hz, 1H), 3.78 – 3.71 (m, 1H), 3.23 (dd, *J* = 10.6, 3.4 Hz, 1H), 3.15 – 3.06 (m, 1H), 2.59 – 2.51 (m, 1H), 2.47 (dd, *J* = 7.2, 1.9 Hz, 2H), 1.92 – 1.81 (m, 1H), 1.52 (d, *J* = 7.2 Hz, 3H), 0.92 (dd, *J* = 6.6, 2.0 Hz, 6H); <sup>13</sup>C{<sup>1</sup>H} NMR (101 MHz, CDCl<sub>3</sub>) δ 196.7, 174.4, 153.7, 144.2, 140.7, 137.7, 137.6, 137.3, 135.9, 134.9, 134.8, 132.5, 131.6, 129.4, 128.2, 127.6, 127.4, 127.2, 127.1, 126.7, 126.4, 126.3, 122.5, 65.9, 49.6, 48.2, 45.3, 45.2, 45.1, 30.2, 27.8, 22.4, 18.6, 18.5; HRLCMS (ESI) *m/z*: [M+H]<sup>+</sup> calcd for C<sub>38</sub>H<sub>36</sub>NO<sub>3</sub>S, 586.2410, found 586.2418.

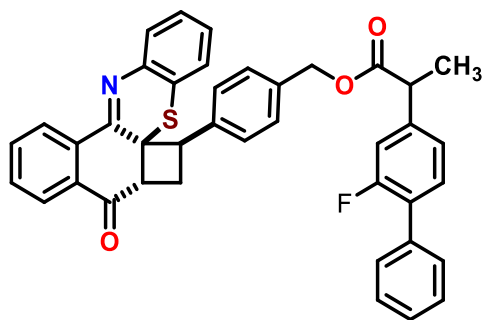

**4-(8-Oxo-6,7,7a,8-tetrahydrobenzo[a]cyclobuta[d]phenothiazin-6-yl) benzyl 2-(2-fluoro-[1,1'-biphenyl]-4-yl) propanoate (2an).** Flurbiprofen coupled cyclobutylated phenothiazine **2af** was prepared by the [2+2] photo-cycloaddition reaction between **1a** and 4-vinylbenzyl 2-(2-fluoro-[1,1'-biphenyl]-4-yl) propanoate (synthesized following reported procedure)<sup>1b</sup> following standard reaction protocol along with 10 mol % Na<sub>2</sub>EosinY photocatalyst as without the catalyst the yield of the desired product was very less. Brownish sticky solid. Yield 228 mg (50% at 0.76 mmol scale), mp: 107 – 109 °C. Purified using CH<sub>2</sub>Cl<sub>2</sub> solvent as eluent. **<sup>1</sup>H NMR (400 MHz, CDCl<sub>3</sub>)** δ 8.72 (dd, *J* = 8.1, 1.3 Hz, 1H), 8.19 (dd, *J* = 7.9, 1.5 Hz, 1H), 7.82 – 7.77 (m, 1H), 7.69 – 7.65 (m, 1H), 7.57 – 7.53 (m, 2H), 7.48 – 7.40 (m, 3H), 7.40 – 7.37 (m, 1H), 7.36 – 7.32 (m, 1H), 7.19 – 7.12 (m, 2H), 7.05 – 6.99 (m, 1H), 6.91 – 6.84 (m, 4H), 6.66 – 6.60 (m, 1H), 6.58 – 6.53 (m, 1H), 4.97 (d, *J* = 3.6 Hz, 2H), 3.90 (t, *J* = 9.3 Hz, 1H), 3.84 – 3.77 (m, 1H), 3.27 – 3.20 (m, 1H), 3.16 – 3.07 (m, 1H), 2.59 – 2.52 (m, 1H), 1.57 (d, *J* = 7.1 Hz, 3H); **<sup>13</sup>C{<sup>1</sup>H} NMR (126 MHz, CDCl<sub>3</sub>)** δ 196.6, 173.7, 160.7, 158.7, 153.6, 144.2, 141.7 (d, *J* = 7.5 Hz), 137.6, 135.8, 135.5, 134.8, 134.6 (d, *J* = 3.2 Hz), 132.5, 131.6, 130.8 (d, *J* = 4.0 Hz), 129.0 (d, *J* = 2.9 Hz), 128.5, 128.3, 128.0, 127.9, 127.8, 127.6, 127.4, 127.3, 127.1, 126.7, 126.5, 126.4, 123.6 (d, *J* = 3.4 Hz), 122.6, 115.4, 115.2, 66.3 (d, *J* = 2.6 Hz), 49.6, 48.1, 45.2, 45.1 (d, *J* = 7.3 Hz), 27.8 (d, *J* = 1.9 Hz), 18.4 (d, *J* = 11.1 Hz); **<sup>19</sup>F{<sup>1</sup>H} NMR (471 MHz, CDCl<sub>3</sub>)** δ -117.50; **HRLCMS (APCI) *m/z*:** [M+H]<sup>+</sup> calcd for C<sub>40</sub>H<sub>31</sub>FNO<sub>3</sub>S, 624.2003, found 624.1987.

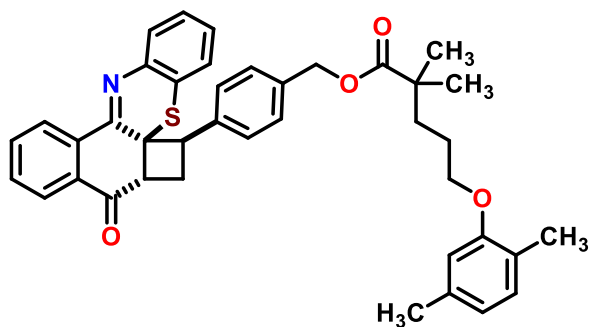

**4-(8-Oxo-6,7,7a,8-tetrahydrobenzo[*a*]cyclobuta[*d*]phenothiazin-6-yl) benzyl 5-(2,5-dimethylphenoxy)-2,2-dimethylpentanoate (2ao).** Gemfibrozil coupled cyclobutylated phenothiazine **2ag** was prepared by the [2+2] photo-cycloaddition reaction between **1a** and 4-vinylbenzyl 5-(2,5-dimethylphenoxy)-2,2-dimethylpentanoate (synthesized following reported procedure)<sup>1b</sup> using standard reaction conditions. Orangish sticky solid. Yield 297 mg (62% at 0.76 mmol scale), mp: 86 – 88 °C. Purified using EtOAc/CH<sub>2</sub>Cl<sub>2</sub> (20:80) as eluent. <sup>1</sup>H NMR (400 MHz, CDCl<sub>3</sub>) δ 8.72 (dd, *J* = 8.1, 1.3 Hz, 1H), 8.19 (dd, *J* = 7.8, 1.4 Hz, 1H), 7.83 – 7.78 (m, 1H), 7.70 – 7.65 (m, 1H), 7.35 (dd, *J* = 7.9, 1.4 Hz, 1H), 7.07 – 7.02 (m, 1H), 7.00 (d, *J* = 7.5 Hz, 1H), 6.95 – 6.88 (m, 4H), 6.72 – 6.65 (m, 2H), 6.62 – 6.58 (m, 2H), 4.93 (d, *J* = 1.7 Hz, 2H), 3.93 – 3.86 (m, 3H), 3.27 – 3.22 (m, 1H), 3.16 – 3.07 (m, 1H), 2.59 – 2.52 (m, 1H), 2.31 (s, 3H), 2.17 (s, 3H), 1.74 (s, 4H), 1.25 (s, 6H); <sup>13</sup>C{<sup>1</sup>H} NMR (101 MHz, CDCl<sub>3</sub>) δ 196.7, 177.5, 156.9, 153.6, 144.2, 137.4, 136.5, 135.9, 135.1, 134.8, 132.5, 131.6, 130.3, 128.3, 127.6, 127.4, 127.1, 126.6, 126.44, 126.4, 123.6, 122.6, 120.8, 111.9, 67.9, 65.7, 49.6, 48.1, 45.2, 42.2, 37.1, 29.7, 27.8, 25.21, 25.17, 21.5, 15.8; HRLCMS (ESI) *m/z*: [M+Na]<sup>+</sup> calcd for C<sub>40</sub>H<sub>39</sub>NO<sub>4</sub>SNa, 652.2492, found 652.2501.

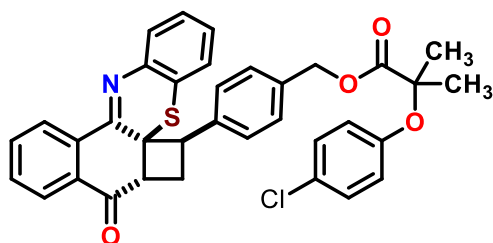

**4-(8-Oxo-6,7,7a,8-tetrahydrobenzo[*a*]cyclobuta[*d*]phenothiazin-6-yl) benzyl 2-(4-chlorophenoxy)-2-methylpropanoate (2ap).** Clofibric acid coupled cyclobutylated phenothiazine **2ah** was prepared by the [2+2] photo-cycloaddition reaction between **1a** and 4-vinylbenzyl 2-(4-chlorophenoxy)-2-methylpropanoate (synthesized following reported procedure)<sup>1b</sup> using standard reaction conditions. Yellow sticky solid. Yield 325 mg (72% at 0.76 mmol scale), mp: 109 – 111 °C. Purified using EtOAc/CH<sub>2</sub>Cl<sub>2</sub> (20:80) as eluent. <sup>1</sup>H NMR (400 MHz, CDCl<sub>3</sub>) δ 8.71 (dd, *J* = 8.2, 1.3 Hz, 1H), 8.18 (dd, *J* = 7.9, 1.5 Hz, 1H), 7.82 – 7.76 (m, 1H), 7.70 – 7.64 (m, 1H), 7.33 (dd, *J* = 8.0, 1.4 Hz, 1H), 7.17 – 7.11 (m, 2H), 7.04 – 6.99 (m, 1H), 6.86 (q, *J* = 8.1 Hz, 4H), 6.75 – 6.70 (m, 2H), 6.68 – 6.63 (m, 1H), 6.55 (dd, *J* = 7.8, 1.4 Hz, 1H), 4.99 (s, 2H), 3.90 (t, *J* = 9.2 Hz, 1H), 3.28 – 3.21 (m, 1H), 3.17 – 3.07 (m, 1H), 2.60 – 2.53 (m, 1H), 1.58 (s, 6H); <sup>13</sup>C{<sup>1</sup>H} NMR (101 MHz, CDCl<sub>3</sub>) δ 196.6, 173.7, 154.0,

153.6, 144.1, 137.8, 135.8, 134.8, 134.0, 132.5, 131.7, 129.1, 128.4, 127.6, 127.37, 127.35, 127.3, 127.1, 126.9, 126.7, 126.4, 122.5, 120.5, 79.5, 66.8, 49.6, 48.1, 45.2, 27.8, 25.4, 25.3; **HRLCMS (ESI)  $m/z$** :  $[M+Na]^+$  calcd for  $C_{35}H_{28}ClNO_4SNa$ , 616.1320, found 616.1290.

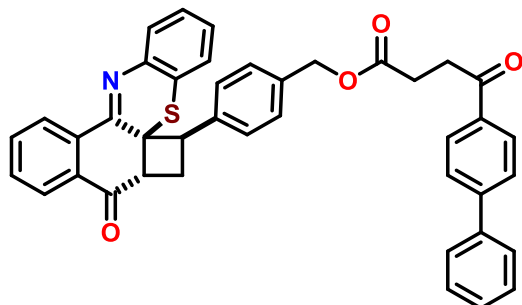

**4-(8-Oxo-6,7,7a,8-tetrahydrobenzo[*a*]cyclobuta[*d*]phenothiazin-6-yl) benzyl 4-([1,1'-biphenyl]-4-yl)-4-oxobutanoate (2aq)**. Fenbufen-coupled cyclobutylated phenothiazine **2ai** was prepared by the [2+2] photo-cycloaddition reaction between **1a** and 4-vinylbenzyl 4-([1,1'-biphenyl]-4-yl)-4-oxobutanoate (synthesized following reported procedure)<sup>1b</sup> using standard reaction conditions. Orangish sticky solid. Yield 328 mg (68% at 0.76 mmol scale), mp: 88 – 90 °C. Purified using EtOAc/CH<sub>2</sub>Cl<sub>2</sub> (10:90) as eluent and did a column for a prolonged time. **<sup>1</sup>H NMR (400 MHz, CDCl<sub>3</sub>)**  $\delta$  8.72 (dd,  $J = 8.1, 1.3$  Hz, 1H), 8.19 (dd,  $J = 7.9, 1.4$  Hz, 1H), 8.09 – 8.05 (m, 2H), 7.82 – 7.78 (m, 1H), 7.72 – 7.66 (m, 3H), 7.65 – 7.61 (m, 2H), 7.50 – 7.45 (m, 2H), 7.43 – 7.39 (m, 1H), 7.34 (dd,  $J = 8.0, 1.3$  Hz, 1H), 7.07 – 7.03 (m, 1H), 6.96 – 6.89 (m, 4H), 6.72 – 6.67 (m, 1H), 6.61 (dd,  $J = 7.8, 1.4$  Hz, 1H), 4.97 (s, 2H), 3.91 (t,  $J = 9.2$  Hz, 1H), 3.37 (t,  $J = 6.6$  Hz, 2H), 3.27 – 3.21 (m, 1H), 3.17 – 3.08 (m, 1H), 2.84 (t,  $J = 6.6$  Hz, 2H), 2.59 – 2.52 (m, 1H); **<sup>13</sup>C{<sup>1</sup>H} NMR (101 MHz, CDCl<sub>3</sub>)**  $\delta$  197.6, 196.7, 172.7, 153.6, 146.0, 144.1, 139.8, 137.5, 135.8, 135.2, 134.8, 134.7, 132.5, 131.6, 129.0, 128.7, 128.34, 128.3, 127.6, 127.4, 127.31, 127.29, 127.2, 126.8, 126.7, 126.5, 122.5, 66.1, 49.6, 48.2, 45.2, 33.4, 28.3, 27.8; **HRLCMS (ESI)  $m/z$** :  $[M+Na]^+$  calcd for  $C_{41}H_{31}NO_4SNa$ , 656.1866, found 656.1897.

## 7. Photophysical Studies Regarding the [2+2] Cycloaddition Reaction

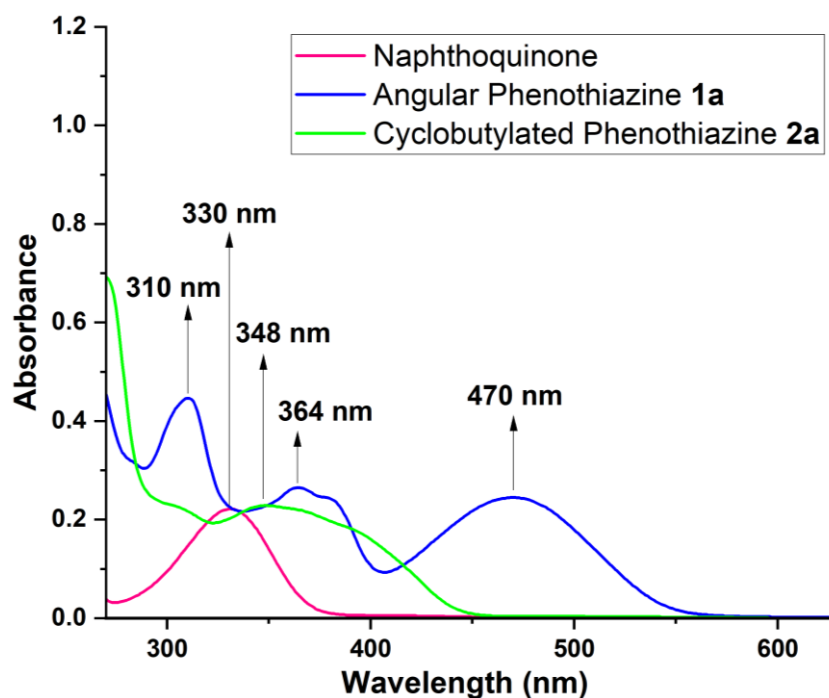

**Figure S5.** Absorption spectra of angular phenothiazine **1a** (60  $\mu\text{M}$ ), cyclobutylated phenothiazine **2a** (60  $\mu\text{M}$ ), and naphthoquinone (60  $\mu\text{M}$ ) in acetonitrile

Next, the electronic absorption spectra of angular phenothiazine **1a** in various solvents were investigated (Figure S6). The normalized absorption spectra revealed consistent maxima around 468-478 nm, with no significant shift observed in different solvents. In water, an elevation in absorption intensity above the baseline was observed, and the broad spectrum indicated the formation of soluble aggregates (Figure S6a). Furthermore, the normalized solvent-dependent emission spectra of **1a** revealed that solvent polarity did not attribute any role to the shift in emission maxima ( $\lambda_{\text{max}} = 605 - 618 \text{ nm}$ , Figure S6b). Cuvette images revealed that, in most of the solvents the angular phenothiazine **1a** exhibited orange emission, in water almost non-emissive, however, in acetone and methanol it exhibited red emission (Figure S6c).

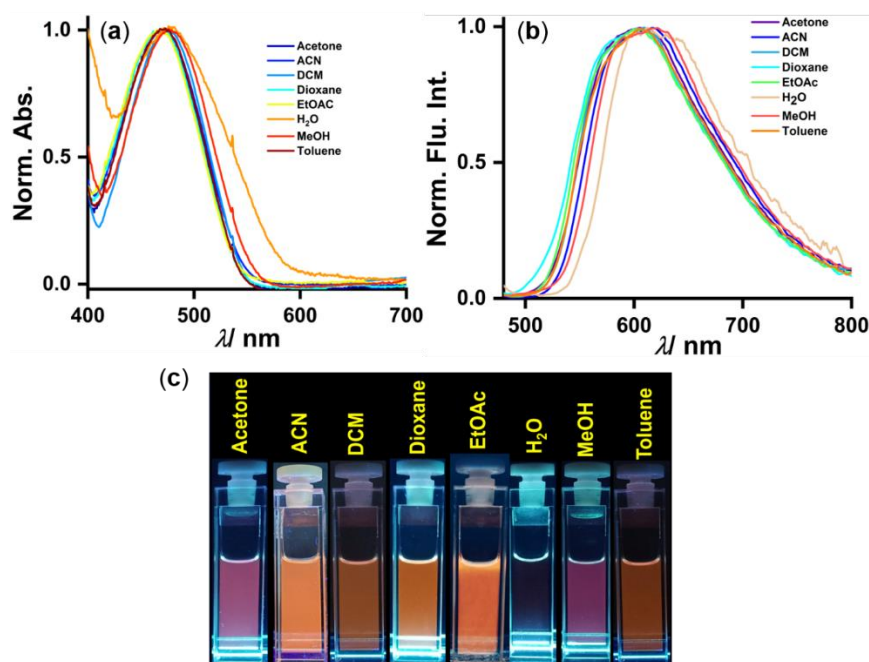

**Figure S6.** (a) UV–Visible absorption spectra of the angular phenothiazine **1a** ( $10 \mu\text{M}$ ) in different solvents, (b) emission spectra of **1a** ( $10 \mu\text{M}$ ) in different solvents, (c) cuvette images in different solvents under 365 nm excitation by a hand-held UV lamp

## Kinetic Studies

The blue light irradiated ( $\lambda_{\text{max}} = 457 \text{ nm}$ ) reaction mixture of angular phenothiazine **1a** and styrene, in acetonitrile was studied by UV–visible spectroscopy at different time intervals. Initially, the absorption spectra of the reaction mixture were recorded by taking  $10 \mu\text{L}$  of aliquot from the reaction vessel before exposing it to light irradiation. Next, the reaction mixture was irradiated with blue light ( $\lambda_{\text{max}} = 457 \text{ nm}$ ), and the same amount ( $10 \mu\text{L}$ ) of the aliquot of the reaction mixture was screened over different time intervals. The spectra of the time-based UV–visible study have been pasted in the main manuscript (Figure 3). The absorption spectrum of the reaction mixture suggests that after 6 hours of light exposure, there was no further decrement in absorbance of the angular phenothiazine **1a** was realized; in other words, the peak at 470 nm gets saturated after 6 hours of light irradiation ( $\lambda_{\text{max}} = 457 \text{ nm}$ ), which means the reaction finished after 6 hours.

Further, the rate of the [2+2] cycloaddition reaction was also studied by the UV-visible experiment. The reaction shows first-order kinetics with respect to both reactants individually, with a rate constant of  $(6.6 \pm 0.4) \times 10^{-3} \text{ min}^{-1}$  (Figure 3c, main manuscript). Moreover, the



initial reaction rate was calculated from the respective rate constants for the first 240 minutes using the first-order rate law. It suggests that the initial rate of the reaction for [2+2] cycloaddition was observed as  $0.26 \mu\text{M min}^{-1}$  within 240 min of the reaction (*vide infra*).

$$\text{Rate of reaction} = - \frac{\Delta(\text{Angular Phenothiazine})}{\Delta\text{time}}$$

$$\text{Rate for the formation of } \mathbf{2a} = - \frac{\Delta(\text{Angular Phenothiazine})}{\Delta\text{time}}$$

$$= - \frac{(17.54 - 80.0) \mu\text{M}}{(240 - 0) \text{min}} = 0.26 \mu\text{M min}^{-1}$$

Rate ( $v_0$ ):  $0.26 \mu\text{M min}^{-1}$  (experiments have been repeated triplicate).

### **Dependency of the Rate of [2+2] Photocycloaddition Reaction on the Intensity of Incident Light**

To investigate whether the rate of the [2+2] photocycloaddition reaction has any dependency on the incident light intensity, we conducted the reaction between angular phenothiazine **1a** and styrene under optimized reaction conditions, at variable light intensities. The reactions were carried out up to saturation and the rate of each reaction was monitored for up to 240 mins (Figure S7). At the optimal light intensity of 900 lx, the reaction rate was at its maximum ( $0.26 \mu\text{M min}^{-1}$ ), with a rate constant of  $(6.6 \pm 0.4) \times 10^{-3} \text{ min}^{-1}$ . As the incident photon concentration decreased, the reaction rate also gradually declined. At 400 lx, the rate was  $0.12 \mu\text{M min}^{-1}$  with a rate constant of  $(1.9 \pm 0.04) \times 10^{-3} \text{ min}^{-1}$ , and at 70 lx, the rate was  $0.097 \mu\text{M min}^{-1}$  with a rate constant of  $(1.5 \pm 0.1) \times 10^{-3} \text{ min}^{-1}$ . These results are suggestive of the dependency of rate law on the intensity of incident light.

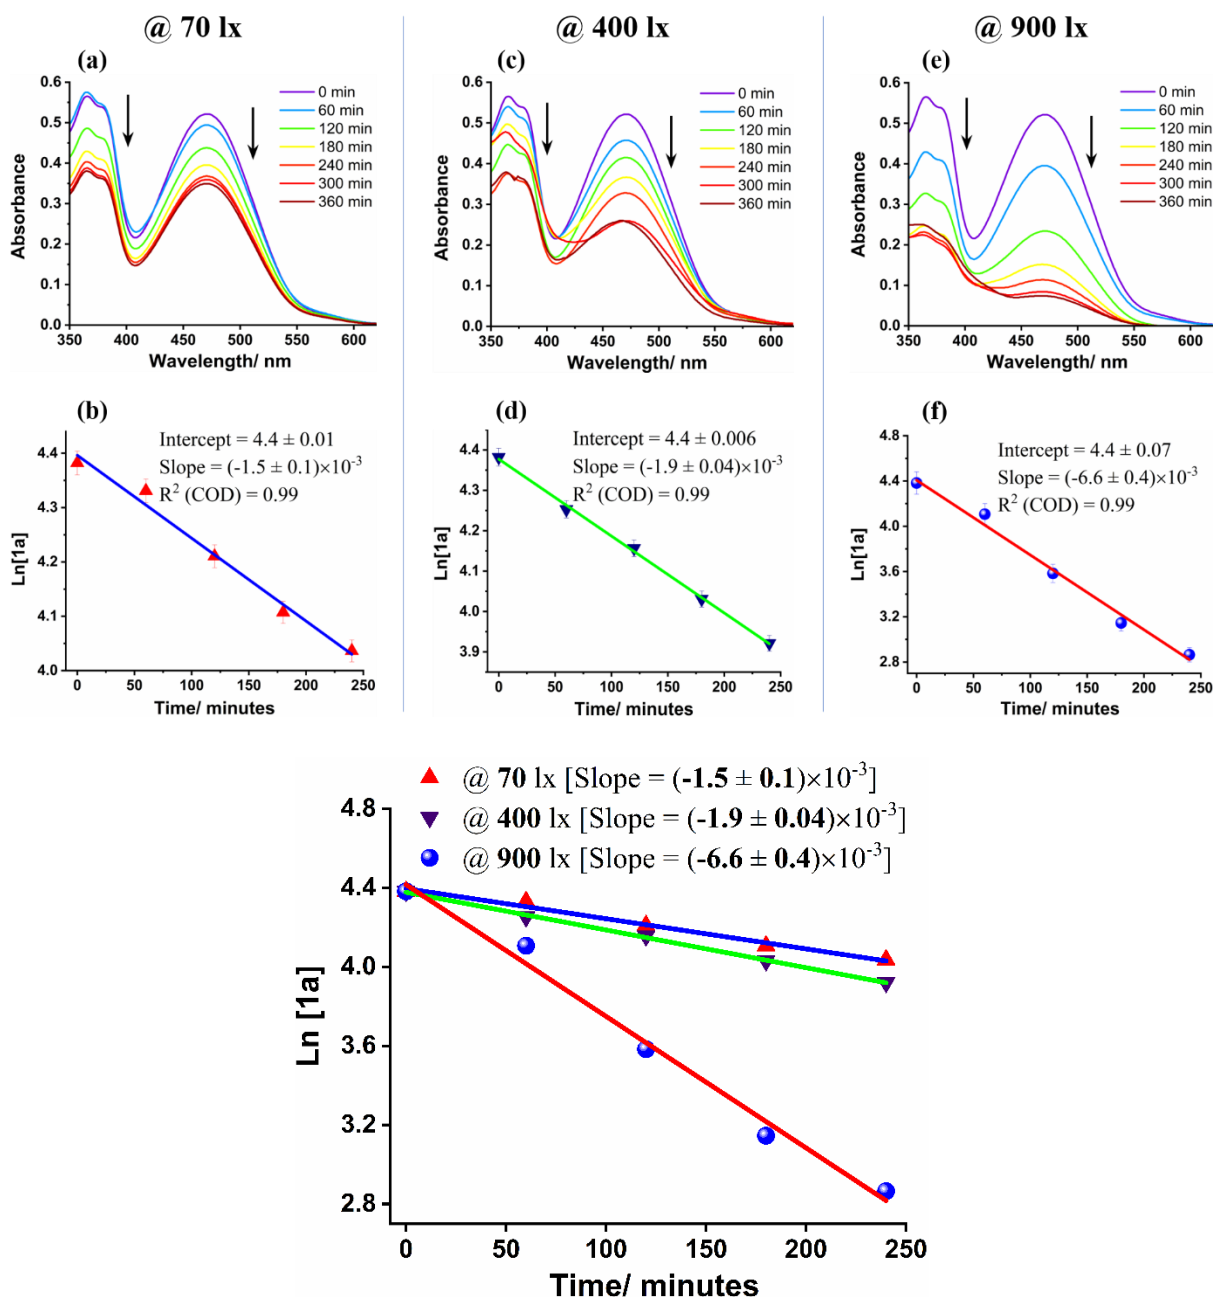

**Figure S7.** Dependence of rate of the [2+2] photocycloaddition reaction at different incident light intensities. (a) time-dependent absorption spectra of the [2+2] cycloaddition reaction at 70 lx; (b) plot of  $\ln[1a]$  with respect to time for determining the rate of reaction at 70 lx; (c) time-dependent absorption spectra of the [2+2] cycloaddition reaction at 400 lx; (d) plot of  $\ln[1a]$  with respect to time for determining the rate of reaction at 400 lx; (e) time-dependent absorption spectra of the [2+2] cycloaddition reaction at 900 lx; (f) plot of  $\ln[1a]$  with respect to time for determining the rate of reaction at 900 lx; (g) ) plot of  $\ln[1a]$  with respect to time at different incident light intensities for determining the rate differences of the cycloaddition reaction.

## Emission Studies

As a part of the kinetic experiment of the [2+2] photocycloaddition reaction, the time-dependent emission spectra of the blue light irradiated ( $\lambda_{\text{max}} = 457 \text{ nm}$ ) reaction mixture of angular phenothiazine **1a** and styrene was measured at room temperature in acetonitrile solvent. Following a similar trend as absorption spectroscopy, in emission spectra also the maximum emission at 611 nm corresponding to the precursor angular phenothiazine **1a** got saturated within 360 minutes, indicating the completion of the cycloaddition reaction (Figure S8).

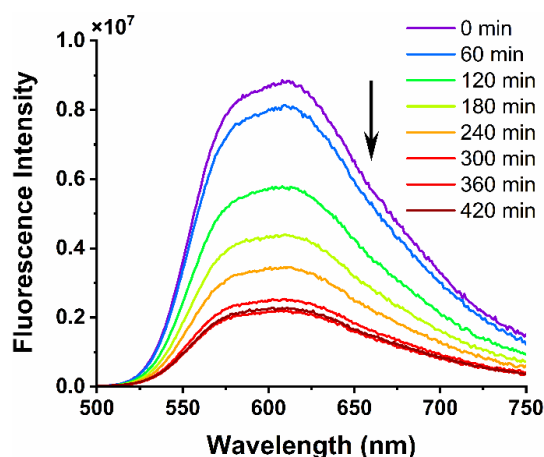

**Figure S8.** Time-dependent emission spectra of the [2+2] photocycloaddition reaction

## 8. Mechanistic Investigations

### Radical Trapping Experiment

When the reaction was carried out in the presence of a radical trapping agent (TEMPO), a drastic decrement in the yield of the desired cyclobutylated phenothiazine **2a** was observed. We have also varied the loading of TEMPO, and we observed that when 3 and 5 equivalents of TEMPO were used, **2a** was obtained in 22% and 6%. When the reaction mixture was subjected for HRMS analysis; along with the desired product **2a**, it showed the formation of the following TEMPO adducts **3**, **4**, and **5**. A reduced form of phenothiazinyl-TEMPO adduct **3** exhibited calculated  $m/z$   $[M+H]^+ = 421.1944$ , observed 421.1928; an oxidized form of styrenyl-TEMPO adduct **4** exhibited calculated  $m/z$   $[M]^+ = 260.2009$ , observed 260.2009; and a phenothiazinyl-styrenyl-TEMPO adduct **5** had calculated  $m/z$   $[M+H]^+ = 680.3880$ , observed 680.3917.

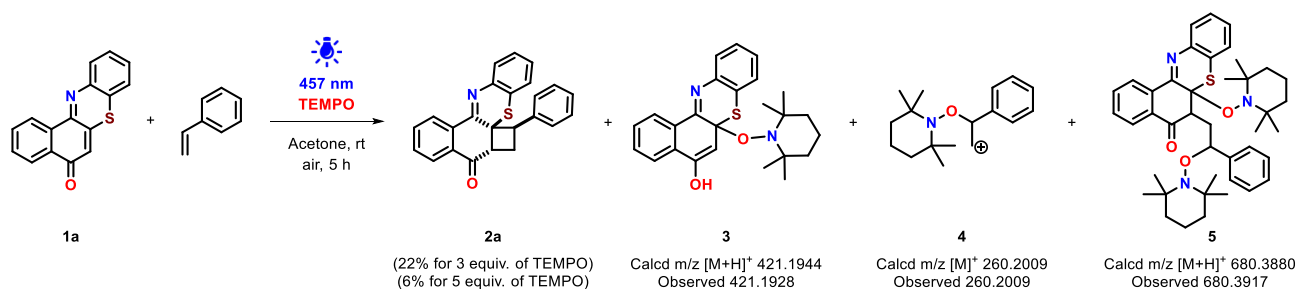

**Scheme S4.** Control experiment: radical trapping experiment with TEMPO

### Mass Spectrum for the reduced form of phenothiazinyl-TEMPO adduct **3**

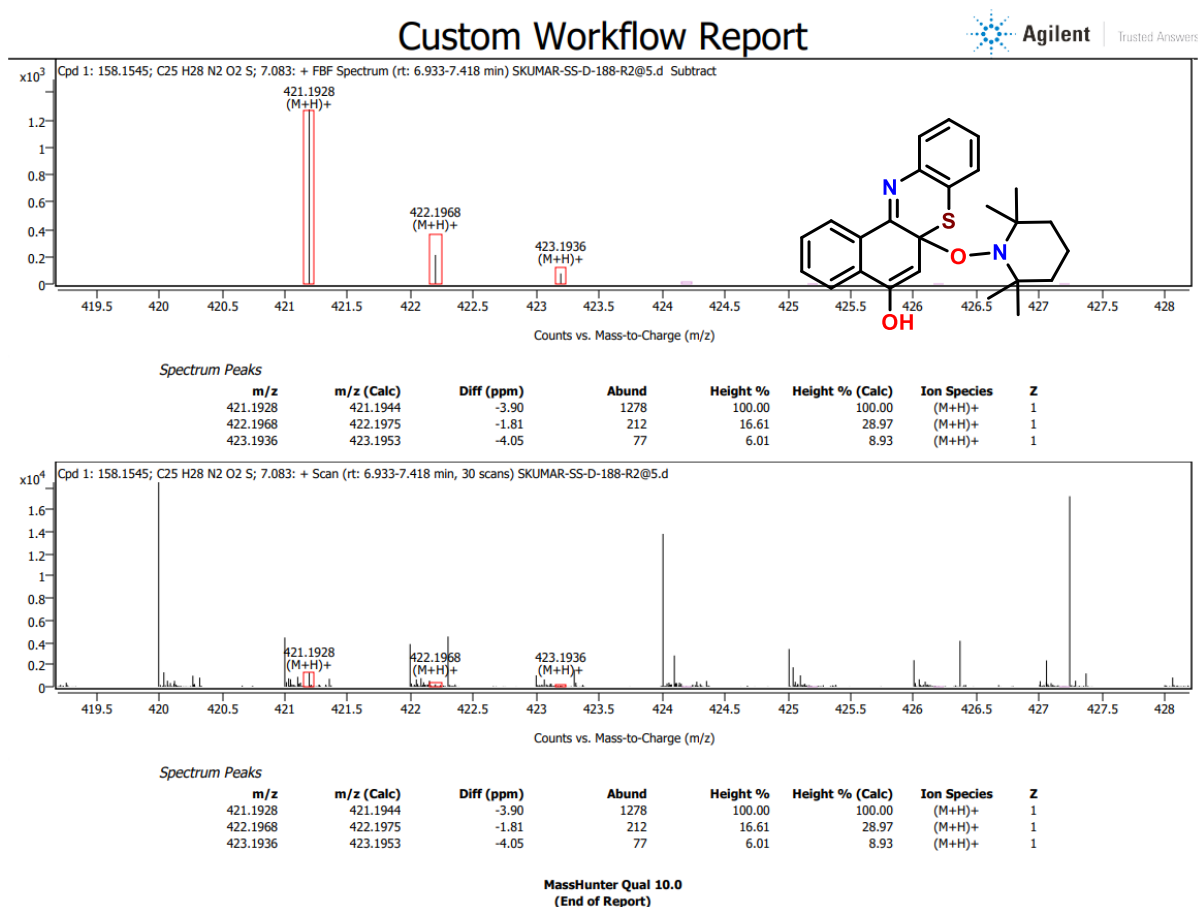

# Mass Spectrum for oxidized form of styrenyl-TEMPO adduct 4

## Custom Workflow Report

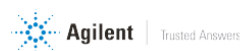

### Compound Spectra (overlaid)

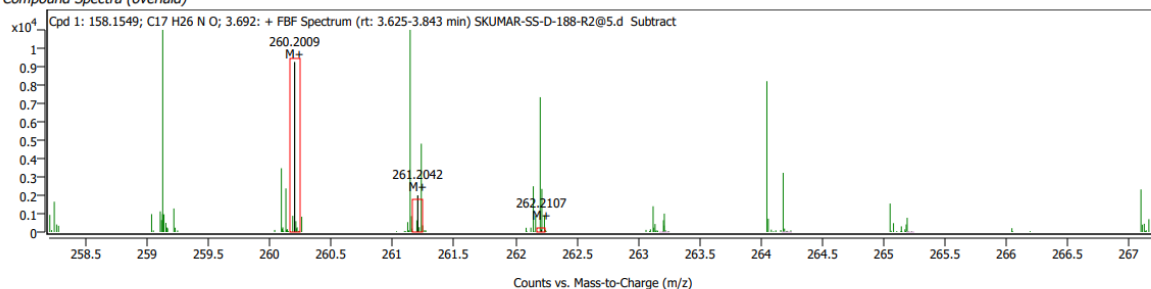

#### Spectrum Peaks

| m/z      | Z | Abund | Diff (ppm) | Height % | Height % (Calc) | Ion Species | Formula  |
|----------|---|-------|------------|----------|-----------------|-------------|----------|
| 260.2009 | 1 | 9248  | 0.19       | 100.00   | 100.00          | M+          | C17H26NO |
| 261.2042 | 1 | 1992  | 0.01       | 21.54    | 19.09           | M+          | C17H26NO |
| 262.2107 | 1 | 127   | 13.23      | 1.38     | 1.93            | M+          | C17H26NO |

### Compound Spectra

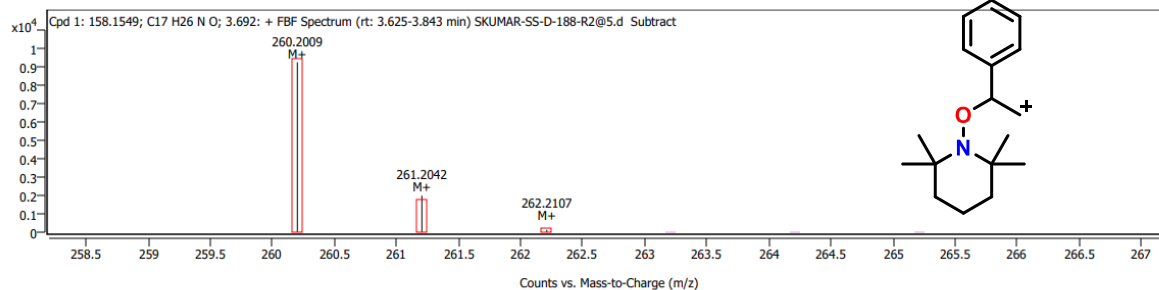

#### Spectrum Peaks

| m/z      | m/z (Calc) | Diff (ppm) | Abund | Height % | Height % (Calc) | Ion Species | Z |
|----------|------------|------------|-------|----------|-----------------|-------------|---|
| 260.2009 | 260.2009   | 0.19       | 9248  | 100.00   | 100.00          | M+          | 1 |
| 261.2042 | 261.2042   | 0.01       | 1992  | 21.54    | 19.09           | M+          | 1 |
| 262.2107 | 262.2072   | 13.23      | 127   | 1.38     | 1.93            | M+          | 1 |

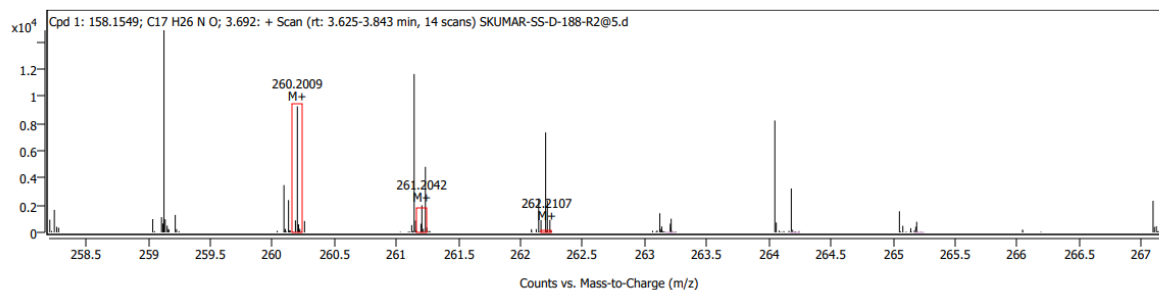

#### Spectrum Peaks

| m/z      | m/z (Calc) | Diff (ppm) | Abund | Height % | Height % (Calc) | Ion Species | Z |
|----------|------------|------------|-------|----------|-----------------|-------------|---|
| 260.2009 | 260.2009   | 0.19       | 9248  | 100.00   | 100.00          | M+          | 1 |
| 261.2042 | 261.2042   | 0.01       | 1992  | 21.54    | 19.09           | M+          | 1 |
| 262.2107 | 262.2072   | 13.23      | 127   | 1.38     | 1.93            | M+          | 1 |

MassHunter Qual 10.0  
(End of Report)

## Mass Spectrum for phenothiazinyl-styrenyl-TEMPO adduct 5

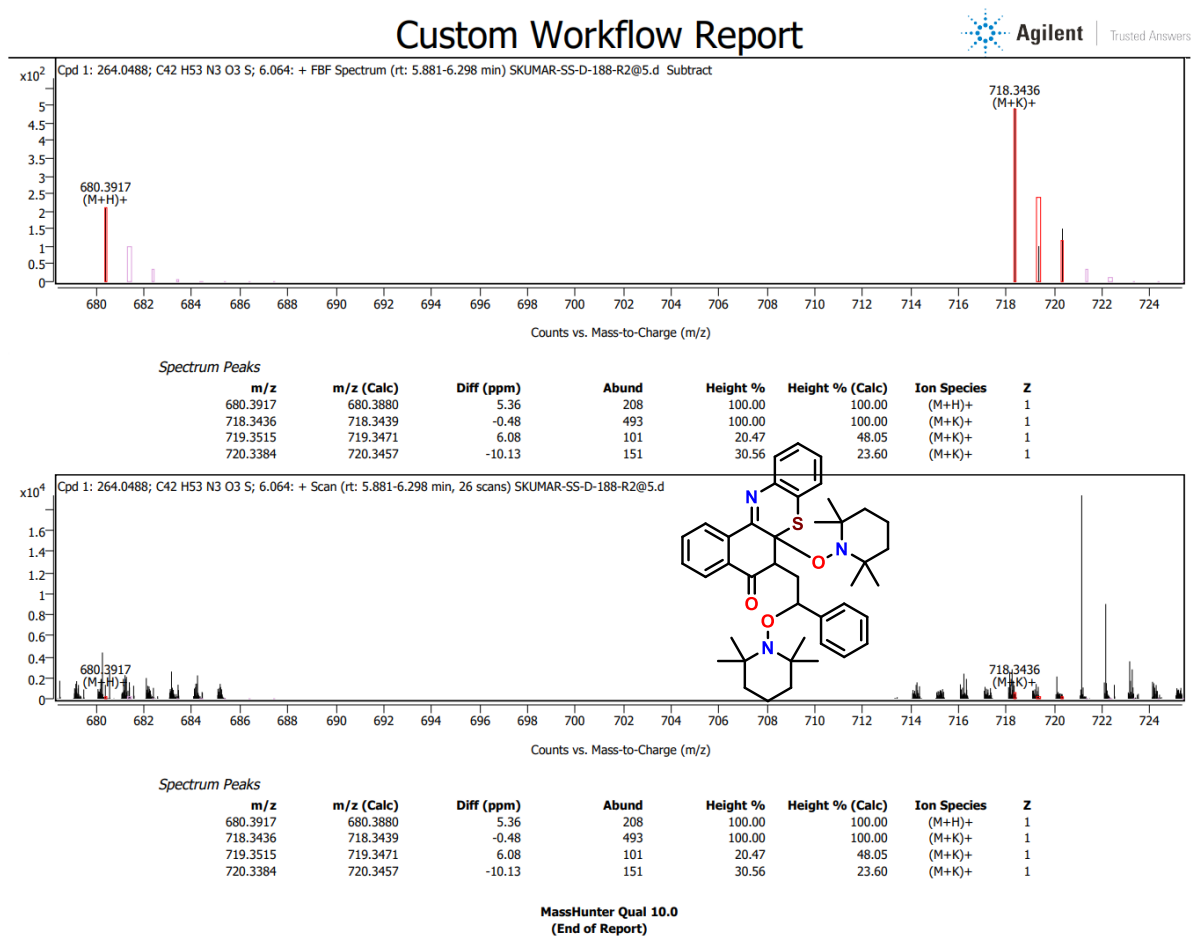

## Calculation of the Rehm-Weller equation for understanding the feasibility of the [2+2] cycloaddition reaction

The Rehm-Weller equation for the calculation of the excited state potential of the electron acceptor is given by the equation:  $E_{1/2}^{*\text{Red}}(\text{A}) = E_{1/2}^{\text{Red}}(\text{A}) + E_{00}(\text{A})$  where,  $E_{1/2}^{*\text{Red}}(\text{A})$  = excited-state redox potential of the acceptor,  $E_{1/2}^{\text{Red}}(\text{A})$  = ground-state redox potential of the acceptor (known by CV experiment) and  $E_{00}(\text{A})$  = mean photon energy of the emission spectra of the acceptor in eV.

Now,  $E_{1/2}^{\text{Red}}(\text{A}) = -0.875 \text{ V}$  [vs Ag/AgCl in acetonitrile, Figure S6 (a)];  $E_{00}(\text{A}) = 2.64 \text{ eV}$  (for 470 nm). Therefore, from the Rehm and Weller equation, the  $E_{1/2}^{*\text{Red}}(\text{A}) = (-0.875 + 2.64) = +1.765 \text{ V}$  (for 470 nm). On the other hand, the one-electron oxidation potential of styrene  $E_{1/2}^{\text{Ox}}(\text{D}) = +1.1 \text{ V}$ . Therefore, the more positive excited-state redox potential  $E_{1/2}^{*\text{Red}}(\text{A})$  value of

angular phenothiazine **1a** (+1.765 V) in comparison to the ground-state one-electron oxidation potential of styrene [ $E_{1/2}^{\text{Ox}}(\text{D}) = +1.1 \text{ V}$ ] strongly suggested that angular phenothiazine **1a** in the excited state is capable of oxidizing styrene.

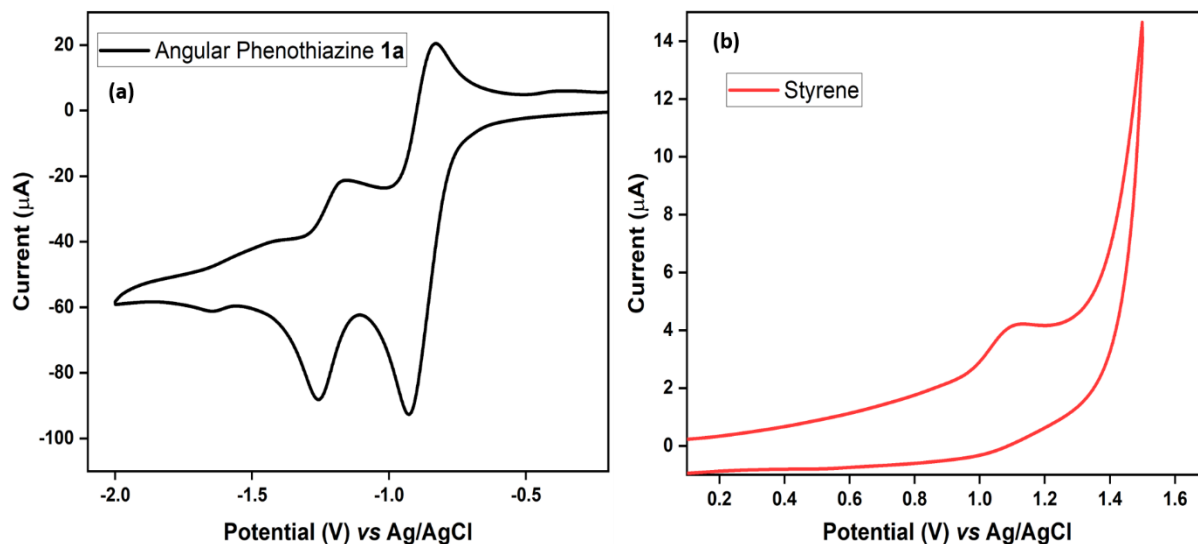

**Figure S9.** CV plots of angular phenothiazine **1a** and styrene. Glassy carbon, Ag/AgCl, and Pt electrode are used as the working, reference, and counter electrodes, respectively, using  $n\text{Bu}_4\text{NPF}_6$  as a supporting electrolyte in acetonitrile solvent within the range of  $\sim 1.3$  to  $-2.0 \text{ V}$ .

Further, the feasibility of the electron transfer process was calculated by the Rehm-Weller Equation where  $\Delta G_{\text{ET}} = E_{1/2}^{\text{Ox}}(\text{D}) - E_{1/2}^{\text{Red}}(\text{A}) - E_{00}(\text{A}) + \Delta E_{\text{Coulombic}}$

Neglecting the very small  $\Delta E_{\text{Coulombic}}$  value and putting all other values we get,

$$\begin{aligned} \Delta G_{\text{ET}} &= 1.1 - (-0.875) - (+2.64) \\ &= -0.665 \text{ V} \\ &= -64.16 \text{ kJ/mol} \end{aligned}$$

which indicates the high feasibility of the photo-induced-electron-transfer (PET) process for the developed [2+2] cycloaddition reaction between angular phenothiazine **1a** and styrene.

## 9. DFT Studies for [2+2] Photo-Cycloaddition Reaction

All computational studies were performed with the Gaussian 09 Revision A.02 program suite with the DFT method of Becke's three-parameter hybrid Hartree-Fock procedure with the LeeYang-Parr correlation function (B3LYP). The geometry optimization and energy calculations of the reactants, intermediates, and transition state were fully optimized by the DFT/B3LYP method with the 6311+g(d,p) basis set in the solution phase using CPCM (Conductor-like Polarizable Continuum Model) model in acetone solvent. The electron density of radical intermediates was also analyzed. Energy obtained from computation is listed in Hartree and converted to kcal/mol.

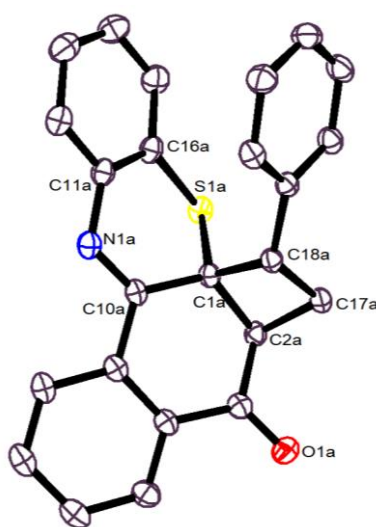

**Table S2.** Comparison of bond lengths and bond angles of the experimentally obtained structure of **2a** and calculated structure using DFT/B3LYP/6-311+g(d,p)

| Atoms         | Experimental | Calculated | % Error |
|---------------|--------------|------------|---------|
| S1a-C1a       | 1.804        | 1.832      | 1.55    |
| N1a-C10a      | 1.287        | 1.288      | 0.07    |
| C1a-C18a      | 1.591        | 1.600      | 0.56    |
| C2a-C17a      | 1.548        | 1.558      | 0.64    |
| C10a-N1a-C11a | 120.67       | 123.06     | 1.98    |
| C1a-S1a-C16a  | 97.46        | 98.99      | 1.57    |
| C2a-C17a-C18a | 88.72        | 89.63      | 1.02    |

In the experiment, **2a** crystallizes in neat  $\text{CHCl}_3$ . The relative error presented here is calculated as  $(|\text{calculated} - \text{experimental}| / |\text{experimental}|) \times 100$ .



### Tetracyclic Angular Phenothiazine 1a

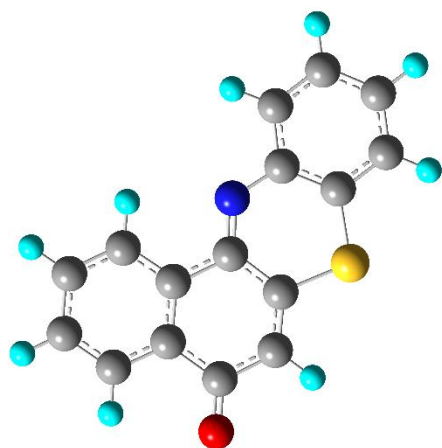

Gibbs free energy: -1143.348964

Correction to Gibbs free energy: 0.162676

Zero-point correction: 0.204152

Imaginary vibration frequency: 0

| Symbol | Coordinates (Å) |           |           |
|--------|-----------------|-----------|-----------|
|        | X               | Y         | Z         |
| C      | -3.185386       | 2.565786  | -0.000081 |
| C      | -1.882386       | 2.089261  | 0.000032  |
| C      | -1.626618       | 0.708218  | 0.000032  |
| C      | -2.715299       | -0.187216 | -0.000031 |
| C      | -4.026120       | 0.306930  | -0.000171 |
| C      | -4.264031       | 1.673558  | -0.000214 |
| H      | -3.366040       | 3.634519  | -0.000070 |
| H      | -1.045770       | 2.774540  | 0.000108  |
| C      | -0.235425       | 0.205176  | 0.000009  |
| C      | -2.490107       | -1.655917 | 0.000188  |
| H      | -4.844353       | -0.402090 | -0.000228 |
| H      | -5.280632       | 2.049146  | -0.000343 |
| C      | -1.115643       | -2.111264 | 0.000052  |
| C      | -0.056755       | -1.254834 | -0.000040 |

|   |           |           |           |
|---|-----------|-----------|-----------|
| H | -0.964088 | -3.185019 | 0.000079  |
| O | -3.433754 | -2.457215 | 0.000477  |
| N | 0.721335  | 1.080510  | 0.000035  |
| S | 1.557762  | -1.941887 | -0.000284 |
| C | 2.066300  | 0.777475  | 0.000018  |
| C | 2.600054  | -0.529395 | -0.000089 |
| C | 2.963844  | 1.866210  | 0.000177  |
| C | 3.984310  | -0.732488 | -0.000065 |
| C | 4.332313  | 1.664010  | 0.000190  |
| H | 2.541452  | 2.863765  | 0.000271  |
| C | 4.842913  | 0.358699  | 0.000063  |
| H | 4.383522  | -1.740232 | -0.000142 |
| H | 5.006994  | 2.511300  | 0.000297  |
| H | 5.913626  | 0.193150  | 0.000082  |

-----

**Excited State Tetracyclic Angular Phenothiazine (I)**

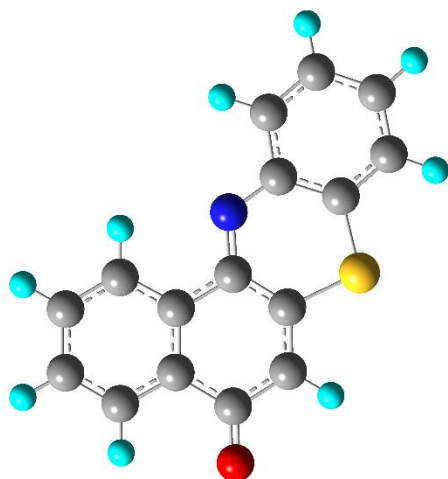

Gibb's free energy: -1143.299412

Correction to Gibb's free energy: 0.159642

Zero-point correction: 0.201948

Imaginary vibration frequency: 0

| Symbol | Coordinates (Å) |           |           |
|--------|-----------------|-----------|-----------|
|        | X               | Y         | Z         |
| C      | -3.182735       | 2.560716  | 0.000143  |
| C      | -1.882090       | 2.083286  | -0.000087 |
| C      | -1.621239       | 0.697198  | -0.000088 |
| C      | -2.722377       | -0.198775 | 0.000058  |
| C      | -4.032269       | 0.304783  | 0.000306  |
| C      | -4.266319       | 1.670716  | 0.000373  |
| H      | -3.361596       | 3.629936  | 0.000139  |
| H      | -1.044009       | 2.766025  | -0.000225 |
| C      | -0.246270       | 0.203287  | -0.000170 |
| C      | -2.496820       | -1.651781 | -0.000109 |
| H      | -4.854713       | -0.399768 | 0.000465  |
| H      | -5.281812       | 2.049188  | 0.000627  |
| C      | -1.128329       | -2.092826 | 0.000343  |
| C      | -0.053590       | -1.184043 | 0.000058  |
| H      | -0.949959       | -3.162234 | 0.000758  |
| O      | -3.431829       | -2.487181 | -0.000718 |
| N      | 0.749746        | 1.144971  | -0.000400 |
| S      | 1.539918        | -1.927940 | 0.000078  |
| C      | 2.049965        | 0.802966  | -0.000152 |
| C      | 2.586952        | -0.533680 | 0.000134  |
| C      | 3.003067        | 1.866424  | -0.000254 |
| C      | 3.971883        | -0.761927 | 0.000272  |
| C      | 4.355828        | 1.625909  | -0.000109 |
| H      | 2.611219        | 2.876165  | -0.000432 |
| C      | 4.852981        | 0.302821  | 0.000179  |
| H      | 4.345953        | -1.779463 | 0.000451  |
| H      | 5.050322        | 2.457880  | -0.000166 |
| H      | 5.920472        | 0.121523  | 0.000292  |

## Styrene

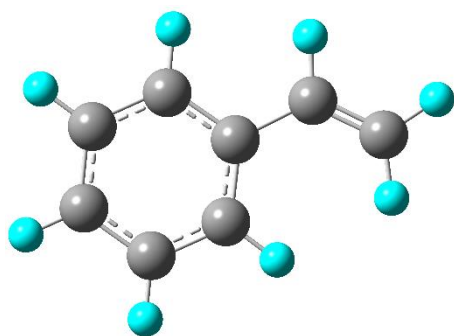

Gibbs free energy: -309.633005

Correction to Gibbs free energy: 0.101493

Zero-point correction: 0.132793

Imaginary vibration frequency: 0

| Symbol | Coordinates (Å) |           |           |
|--------|-----------------|-----------|-----------|
|        | X               | Y         | Z         |
| C      | -0.405818       | -1.281207 | -0.000005 |
| C      | 0.514374        | -0.220144 | 0.000012  |
| C      | 0.009281        | 1.092136  | 0.000032  |
| C      | -1.361198       | 1.328681  | 0.000009  |
| C      | -2.263644       | 0.261441  | -0.000018 |
| C      | -1.779672       | -1.045656 | -0.000013 |
| H      | -0.036093       | -2.301481 | 0.000001  |
| H      | 0.689685        | 1.935688  | 0.000065  |
| H      | -1.729200       | 2.348710  | 0.000012  |
| H      | -3.331185       | 0.449892  | -0.000036 |
| H      | -2.469592       | -1.882092 | -0.000031 |
| C      | 1.954802        | -0.529976 | 0.000025  |
| H      | 2.186790        | -1.592872 | 0.000130  |
| C      | 2.974595        | 0.336077  | -0.000044 |
| H      | 2.834422        | 1.411517  | -0.000123 |
| H      | 3.998846        | -0.017477 | -0.000009 |

### Radical Ion Pair II

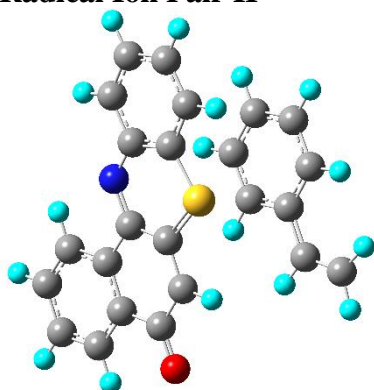

Gibbs free energy: -1452.922080

Correction to Gibbs free energy: 0.271952

Zero-point correction: 0.334703

Imaginary vibration frequency: 0

| Symbol | Coordinates (Å) |           |           |
|--------|-----------------|-----------|-----------|
|        | X               | Y         | Z         |
| S      | -0.798707       | 1.290740  | -2.167449 |
| O      | 3.800111        | -0.676985 | -2.249672 |
| N      | 0.017135        | 1.951904  | 0.825685  |
| C      | 0.699523        | 0.942640  | -1.315596 |
| C      | 1.672314        | 0.274417  | -2.082813 |
| C      | 2.954853        | -0.082318 | -1.539621 |
| C      | 3.203915        | 0.284760  | -0.137550 |
| C      | 4.433926        | -0.031534 | 0.459664  |
| H      | 5.178735        | -0.544887 | -0.135705 |
| C      | 4.688287        | 0.305471  | 1.779620  |
| H      | 5.641476        | 0.056584  | 2.231272  |
| C      | 3.706438        | 0.970432  | 2.527900  |
| H      | 3.901650        | 1.235853  | 3.560713  |
| C      | 2.485861        | 1.291625  | 1.956417  |
| H      | 1.726432        | 1.804291  | 2.529924  |
| C      | 2.205969        | 0.958080  | 0.614832  |

|   |           |           |           |
|---|-----------|-----------|-----------|
| C | 0.915958  | 1.301451  | 0.020841  |
| C | -1.195183 | 2.324636  | 0.379713  |
| C | -2.049308 | 3.001690  | 1.302415  |
| H | -1.660893 | 3.166842  | 2.299914  |
| C | -3.306110 | 3.427775  | 0.946369  |
| H | -3.926814 | 3.939215  | 1.672797  |
| C | -3.799688 | 3.206825  | -0.359534 |
| H | -4.790954 | 3.546527  | -0.632387 |
| C | -3.012830 | 2.554575  | -1.289863 |
| H | -3.384334 | 2.381225  | -2.293647 |
| C | -1.727323 | 2.111686  | -0.941752 |
| C | -0.461926 | -4.448600 | -1.981702 |
| 6 | -0.251385 | -4.062293 | -0.718181 |
| H | 0.743596  | -4.199636 | -0.300453 |
| C | -1.224303 | -3.458175 | 0.208601  |
| C | -0.812284 | -3.149965 | 1.515262  |
| H | 0.210500  | -3.360621 | 1.810531  |
| C | -1.692078 | -2.580644 | 2.434574  |
| H | -1.349479 | -2.351797 | 3.437548  |
| C | -3.007686 | -2.307463 | 2.064564  |
| H | -3.695792 | -1.864921 | 2.775762  |
| C | -3.433456 | -2.607588 | 0.767470  |
| H | -4.455114 | -2.397038 | 0.471151  |
| C | -2.554687 | -3.175308 | -0.148777 |
| H | -2.907313 | -3.398175 | -1.149220 |
| H | 1.477019  | 0.006274  | -3.115135 |
| H | -1.422850 | -4.349900 | -2.475073 |
| H | 0.339822  | -4.882164 | -2.568354 |

---

### 1,4-Biradical Intermediate (III)

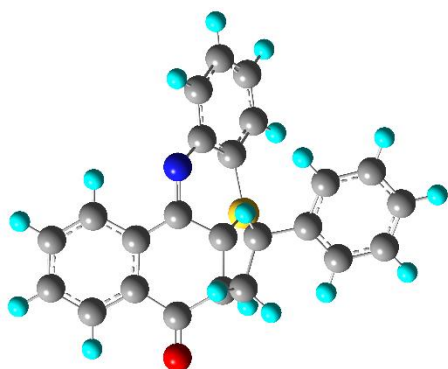

Gibbs free energy: -1452.944876

Correction to Gibbs free energy: 0.292393

Zero-point correction: 0.342527

Imaginary vibration frequency: 0

| Symbol | Coordinates (Å) |           |           |
|--------|-----------------|-----------|-----------|
|        | X               | Y         | Z         |
| S      | 0.645573        | 0.190950  | 1.580085  |
| O      | -2.892292       | -2.953916 | 1.143164  |
| N      | -0.564916       | 1.658342  | -0.927185 |
| C      | -0.225373       | -0.551059 | 0.097243  |
| C      | -0.895711       | -1.904787 | 0.405583  |
| H      | -0.406083       | -2.423560 | 1.231343  |
| C      | -2.387165       | -1.954445 | 0.633309  |
| C      | -3.178147       | -0.802351 | 0.179384  |
| C      | -4.575430       | -0.862911 | 0.249958  |
| H      | -5.026919       | -1.761605 | 0.652480  |
| C      | -5.366664       | 0.189465  | -0.187072 |
| H      | -6.446295       | 0.123508  | -0.127630 |
| C      | -4.754872       | 1.341647  | -0.723053 |
| H      | -5.370868       | 2.160959  | -1.076577 |
| C      | -3.383553       | 1.435539  | -0.808834 |

|   |           |           |           |
|---|-----------|-----------|-----------|
| H | -2.919102 | 2.316051  | -1.232811 |
| C | -2.540850 | 0.375202  | -0.351020 |
| C | -1.138178 | 0.499944  | -0.410629 |
| C | 0.431195  | 2.260458  | -0.293977 |
| C | 0.935983  | 3.492646  | -0.843022 |
| H | 0.490431  | 3.836472  | -1.768763 |
| C | 1.899316  | 4.219867  | -0.196489 |
| H | 2.244724  | 5.158653  | -0.612660 |
| C | 2.449475  | 3.747128  | 1.018852  |
| H | 3.214103  | 4.322983  | 1.526080  |
| C | 2.040891  | 2.530538  | 1.553559  |
| H | 2.505993  | 2.158261  | 2.459249  |
| C | 1.054919  | 1.768541  | 0.924551  |
| C | -0.356485 | -2.437742 | -0.961603 |
| H | -1.104053 | -2.382745 | -1.753599 |
| H | 0.063723  | -3.441912 | -0.938276 |
| C | 0.652624  | -1.253617 | -1.041817 |
| H | 0.594410  | -0.691385 | -1.973251 |
| C | 2.102943  | -1.543387 | -0.747496 |
| C | 3.087938  | -0.738303 | -1.335703 |
| H | 2.790271  | 0.064596  | -2.002114 |
| C | 4.441836  | -0.956499 | -1.085067 |
| H | 5.185332  | -0.322744 | -1.555546 |
| C | 4.837795  | -1.991166 | -0.238324 |
| H | 5.889743  | -2.166412 | -0.043462 |
| C | 3.869123  | -2.804317 | 0.349867  |
| H | 4.165710  | -3.615548 | 1.005356  |
| C | 2.516116  | -2.582697 | 0.096859  |
| H | 1.786123  | -3.234000 | 0.563452  |

---



**[2+2] Cycloaddition Product: Pentacyclic Cyclobutylated Angular Phenothiazine 2a**

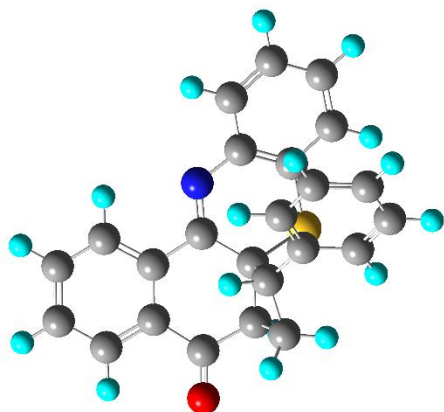

Gibbs free energy: -1452.944872

Correction to Gibbs free energy: 0.292397

Zero-point correction: 0.342529

Imaginary vibration frequency: 0

| Symbol | Coordinates (Å) |           |           |
|--------|-----------------|-----------|-----------|
|        | X               | Y         | Z         |
| S      | 0.679147        | -0.018942 | 2.015083  |
| O      | -3.615294       | -2.419026 | 0.970961  |
| N      | -0.326995       | 1.829751  | -0.228121 |
| C      | -0.453045       | -0.477280 | 0.648903  |
| C      | -1.424243       | -1.567708 | 1.179743  |
| H      | -1.450691       | -1.670330 | 2.267756  |
| C      | -2.864575       | -1.484876 | 0.726736  |
| C      | -3.332928       | -0.273188 | 0.009146  |
| C      | -4.688417       | -0.207768 | -0.351570 |
| H      | -5.328635       | -1.041521 | -0.093121 |
| C      | -5.193634       | 0.895735  | -1.019136 |
| H      | -6.241213       | 0.935828  | -1.292921 |
| C      | -4.339387       | 1.958119  | -1.337564 |
| H      | -4.724868       | 2.824830  | -1.862174 |
| C      | -2.998852       | 1.908874  | -0.986498 |

|   |           |           |           |
|---|-----------|-----------|-----------|
| H | -2.336402 | 2.727573  | -1.231648 |
| C | -2.467532 | 0.798622  | -0.307916 |
| C | -1.027723 | 0.785168  | 0.050523  |
| C | 1.007878  | 1.972010  | 0.146651  |
| C | 1.757824  | 2.978787  | -0.485479 |
| H | 1.286806  | 3.536859  | -1.286450 |
| C | 3.058007  | 3.259302  | -0.087927 |
| H | 3.621978  | 4.036053  | -0.590702 |
| C | 3.629092  | 2.551034  | 0.973940  |
| H | 4.638022  | 2.774936  | 1.300288  |
| C | 2.907661  | 1.545493  | 1.611108  |
| H | 3.356340  | 0.984592  | 2.423156  |
| C | 1.610034  | 1.240269  | 1.192357  |
| C | -0.591525 | -2.658826 | 0.442208  |
| H | -1.154144 | -3.410334 | -0.111205 |
| H | 0.090145  | -3.160959 | 1.127154  |
| C | 0.089468  | -1.553186 | -0.403512 |
| H | -0.497851 | -1.396182 | -1.313140 |
| C | 1.539665  | -1.641630 | -0.793277 |
| C | 1.958651  | -1.094961 | -2.015039 |
| H | 1.229173  | -0.619564 | -2.662875 |
| C | 3.292474  | -1.157496 | -2.412396 |
| H | 3.592480  | -0.729766 | -3.362584 |
| C | 4.236987  | -1.776302 | -1.592738 |
| H | 5.275180  | -1.831134 | -1.900355 |
| C | 3.833629  | -2.331791 | -0.379145 |
| H | 4.558703  | -2.821172 | 0.261728  |
| C | 2.497552  | -2.265860 | 0.016461  |
| H | 2.207580  | -2.707926 | 0.961463  |

---

### Molecular Orbital Picture of Optimized Structures

To get more insight into the mechanistic pathway of [2+2] photo-cycloaddition between angular phenothiazine **1a** and styrene, we have also looked into the SOMO, HOMO, and LUMO pictures of the reactants, intermediates, and product.

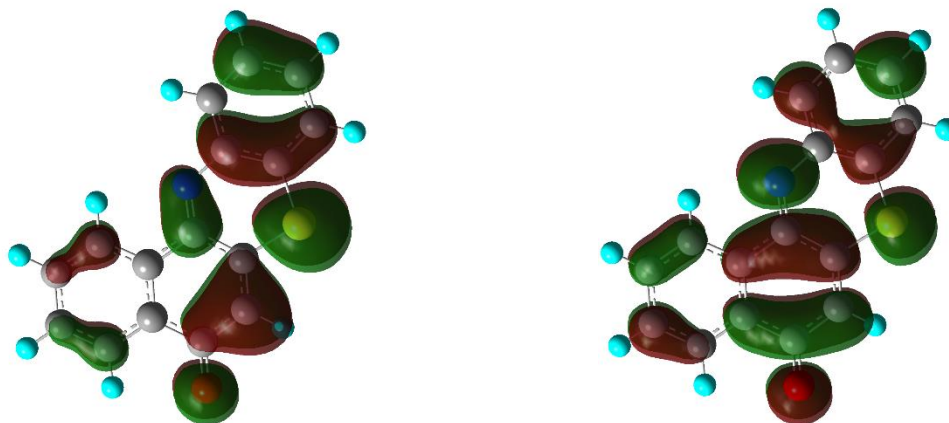

**Figure S10.** HOMO (left) and LUMO (right) pictures of the **angular phenothiazine 1a**

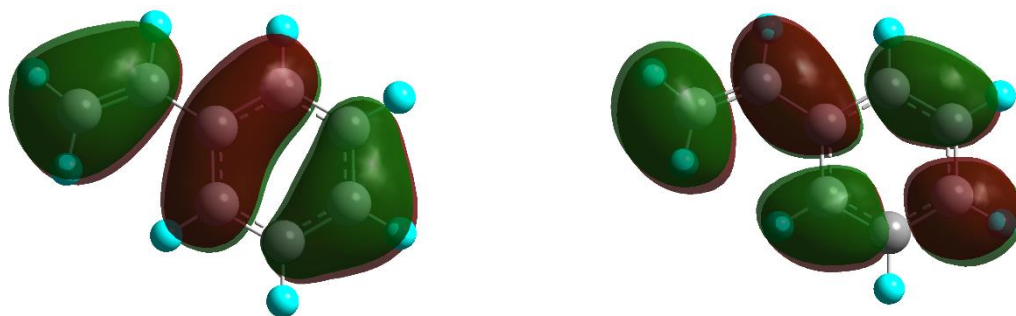

**Figure S11.** HOMO (left) and LUMO (right) pictures of **styrene**

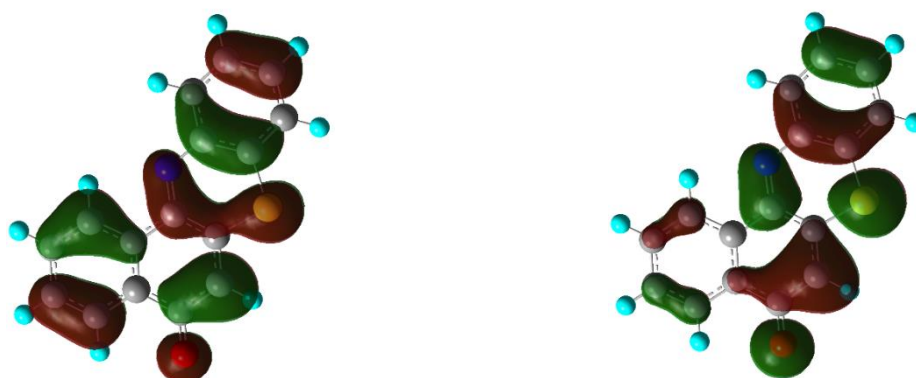

**Figure S12.** SOMO (left) and LUMO (right) pictures of **excited state angular phenothiazine (I)**

This pictorial view of the singly occupied molecular orbital (SOMO) of excited state angular phenothiazine (**I**) indicates that electrons lie more on the carbon atom adjacent to sulfur, and HOMO of styrene lies on the whole molecule. The energy difference between the SOMO of excited state angular phenothiazine (**I**) and the HOMO of styrene is 6.11 kcal/mol (0.27 eV), which is highly favorable for electron transfer.

(a)

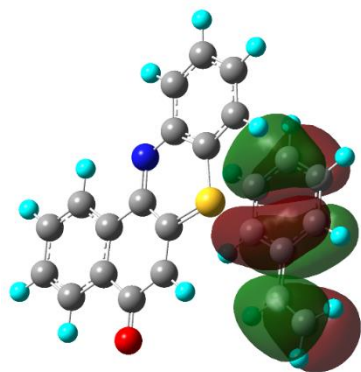

(b)

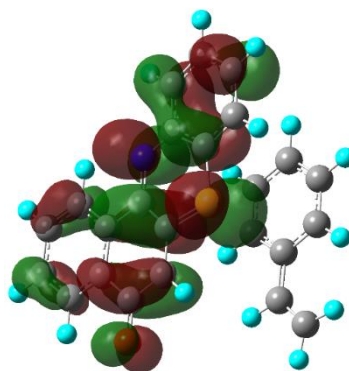

(c)

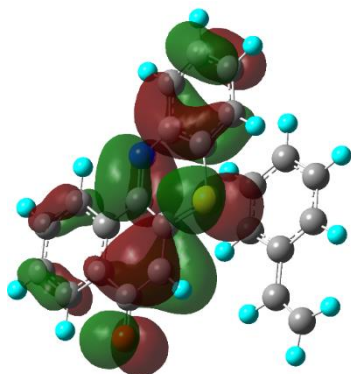

(d)

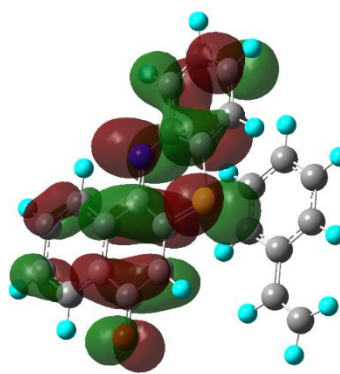

**Figure S13.** (a) SOMO, (b) SOMO + 1, (c) LUMO, and (d) LUMO + 1 pictures of **radical-ion pair II**

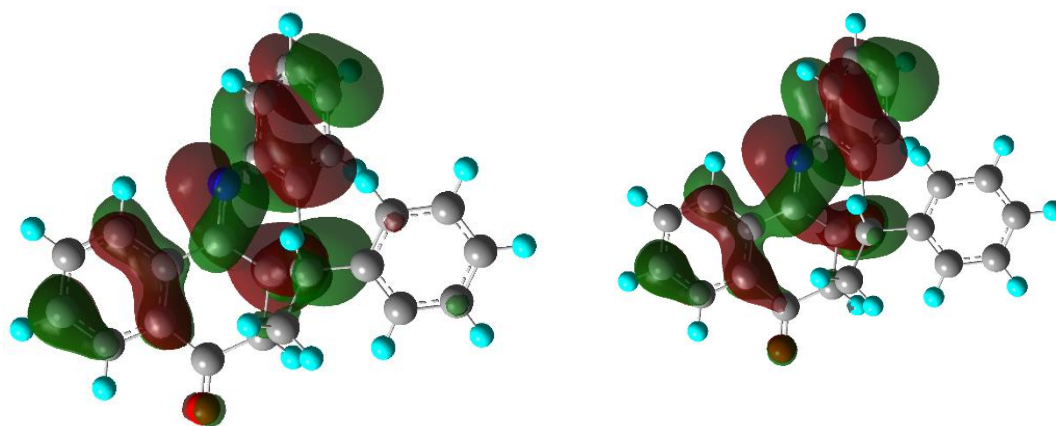

**Figure S14.** SOMO (left) and LUMO (right) pictures of the proposed **1,4-biradical intermediate (III)**

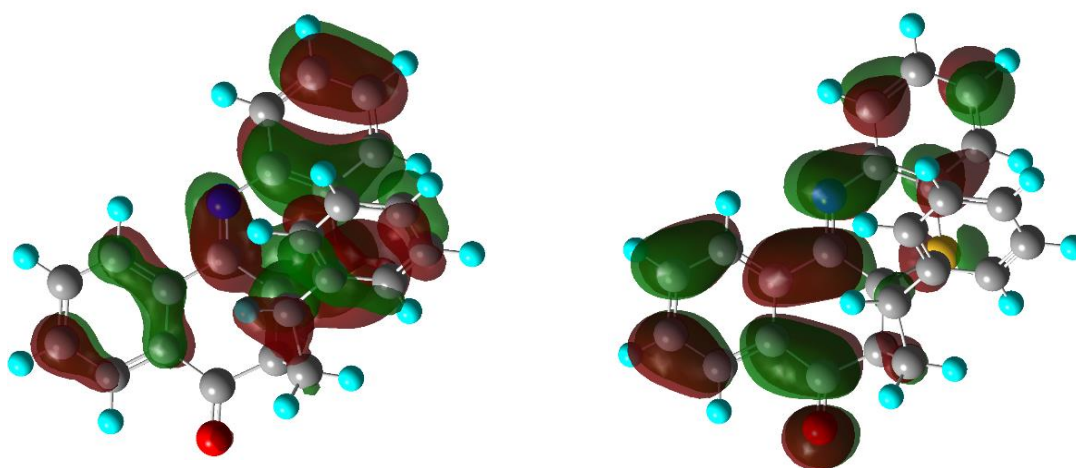

**Figure S15.** HOMO (left) and LUMO (right) pictures of the **[2+2] cycloadduct: cyclobutylated phenothiazine 2a**

## Spin Density Profile for Radical Intermediates

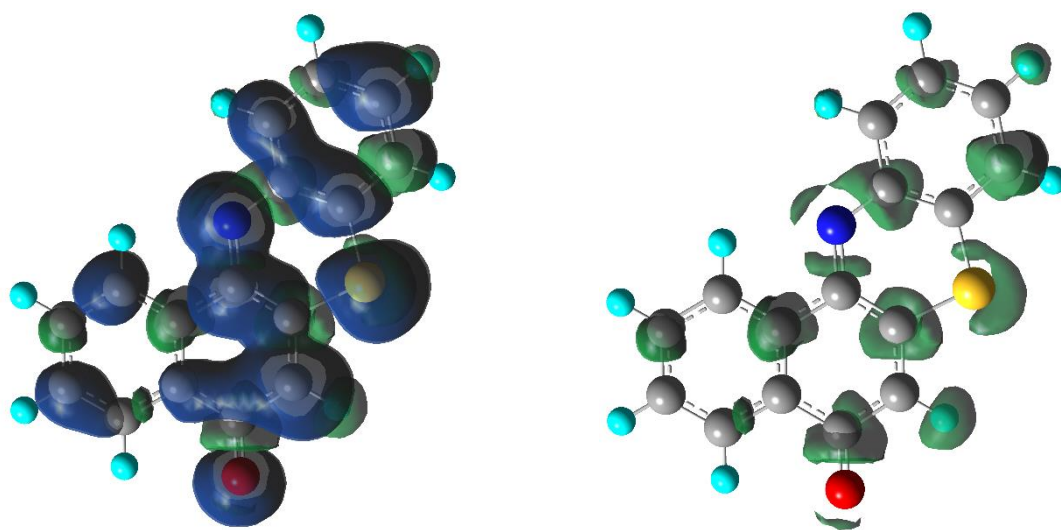

**Figure S16.** Spin density profile of **excited state angular phenothiazine (I)** with (a) total electron density, and (b) negative electron density.

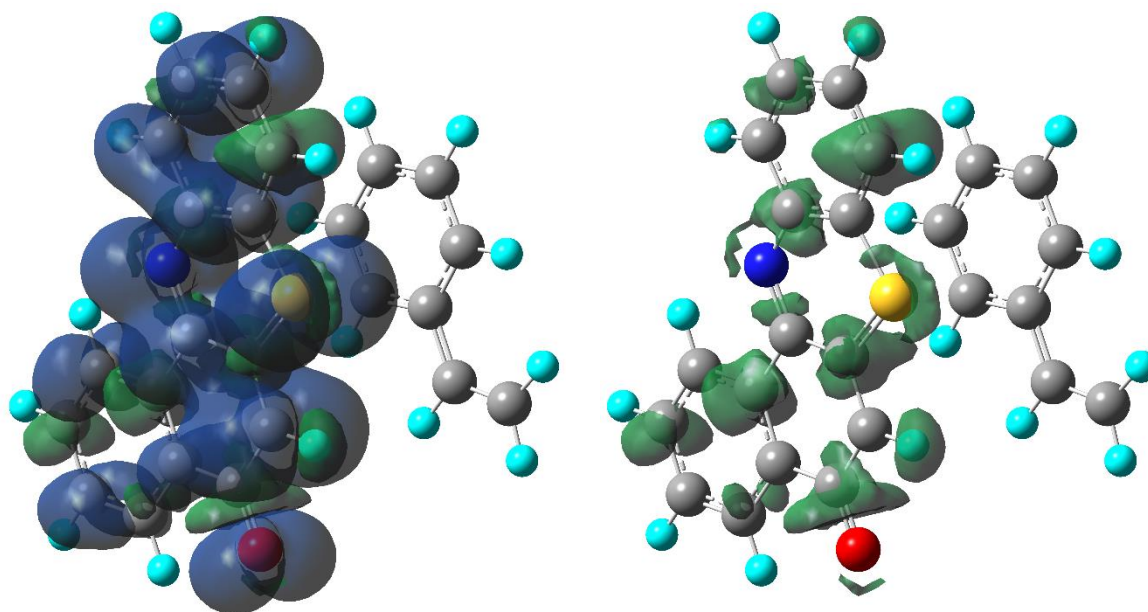

**Figure S17.** Spin density profile of **radical-ion pair (II)** with (a) total electron density, and (b) negative electron density.

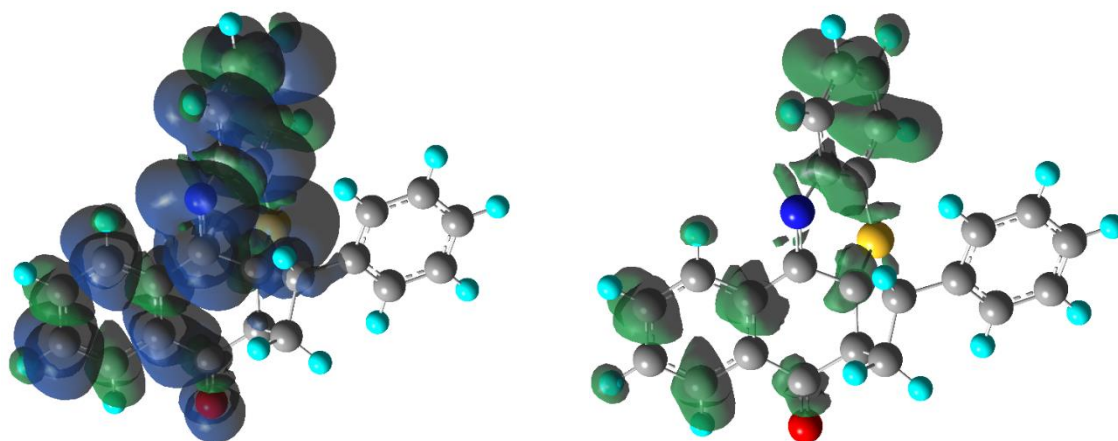

**Figure S18.** Spin density profile of proposed **1,4-biradical intermediate (III)** with (a) total electron density, and (b) negative electron density.

### Calculation for Lowest Excited State Phenothiazine

We have performed TD-DFT to get the energies of the lowest lying singlet and triplet state of phenothiazine molecule using B3LYP/6-311+g(d,p) level of theory with N = 10 states and acetone solvent.

### Lowest Excited Singlet State Phenothiazine

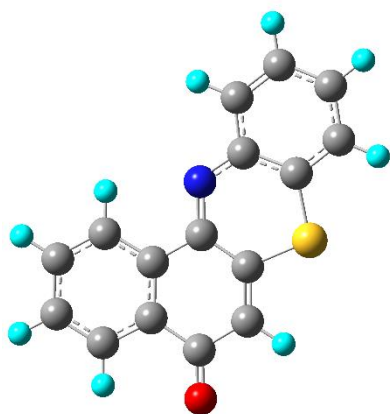

Electronic + Thermal Free Energies: -1143.267953

Correction to Gibb's free energy: 0.160120

Zero-point correction: 0.201577

Imaginary vibration frequency: 0

| Symbol | Coordinates (Angstroms) |           |           |
|--------|-------------------------|-----------|-----------|
|        | X                       | Y         | Z         |
| C      | -3.207955               | 2.549335  | -0.000053 |
| C      | -1.902631               | 2.085773  | -0.000033 |
| C      | -1.620783               | 0.701859  | -0.000030 |
| C      | -2.718220               | -0.207641 | -0.000050 |
| C      | -4.036464               | 0.288921  | -0.000070 |
| C      | -4.287489               | 1.649147  | -0.000072 |
| H      | -3.395855               | 3.617233  | -0.000055 |
| H      | -1.073099               | 2.779730  | -0.000019 |
| C      | -0.246362               | 0.233370  | -0.000006 |
| C      | -2.497820               | -1.654952 | -0.000047 |
| H      | -4.850004               | -0.426301 | -0.000083 |
| H      | -5.306209               | 2.018238  | -0.000086 |
| C      | -1.105379               | -2.085219 | -0.000029 |
| C      | -0.052438               | -1.174371 | -0.000004 |
| H      | -0.916035               | -3.152821 | -0.000034 |
| O      | -3.413900               | -2.500210 | -0.000075 |
| N      | 0.750639                | 1.153464  | 0.000014  |
| S      | 1.531729                | -1.905343 | 0.000030  |
| C      | 2.055688                | 0.813581  | 0.000040  |
| C      | 2.589224                | -0.529424 | 0.000049  |
| C      | 3.012727                | 1.862629  | 0.000057  |
| C      | 3.972066                | -0.771452 | 0.000074  |
| C      | 4.370353                | 1.609912  | 0.000081  |
| H      | 2.634490                | 2.877597  | 0.000050  |
| C      | 4.862712                | 0.287338  | 0.000090  |
| H      | 4.335867                | -1.792865 | 0.000080  |
| H      | 5.067651                | 2.439591  | 0.000094  |
| H      | 5.928892                | 0.099678  | 0.000108  |



## Lowest Excited Triplet State Phenothiazine

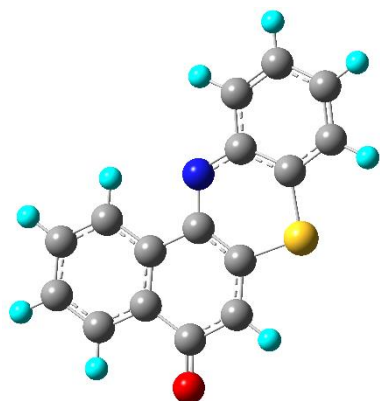

Electronic + Thermal Free Energies: -1143.307452

Correction to Gibb's free energy: 0.158881

Zero-point correction: 0.200670

Imaginary vibration frequency: 0

---

| Symbol | Coordinates (Angstroms) |           |           |
|--------|-------------------------|-----------|-----------|
|        | X                       | Y         | Z         |
| C      | -3.175225               | 2.564122  | -0.000067 |
| C      | -1.875721               | 2.079375  | -0.000030 |
| C      | -1.625239               | 0.692529  | -0.000011 |
| C      | -2.732644               | -0.194434 | -0.000027 |
| C      | -4.038438               | 0.312800  | -0.000069 |
| C      | -4.263141               | 1.682035  | -0.000087 |
| H      | -3.347834               | 3.634282  | -0.000082 |
| H      | -1.033256               | 2.756065  | -0.000018 |
| C      | -0.252898               | 0.186045  | 0.000018  |
| C      | -2.502221               | -1.645984 | 0.000011  |
| H      | -4.866223               | -0.385412 | -0.000081 |
| H      | -5.276230               | 2.066587  | -0.000115 |
| C      | -1.137454               | -2.094828 | -0.000017 |
| C      | -0.052096               | -1.188187 | -0.000000 |
| H      | -0.968576               | -3.165608 | -0.000041 |
| O      | -3.433279               | -2.485186 | -0.000083 |
| N      | 0.751260                | 1.154811  | 0.000028  |

|   |          |           |           |
|---|----------|-----------|-----------|
| S | 1.546144 | -1.947014 | -0.000009 |
| C | 2.048919 | 0.802356  | 0.000050  |
| C | 2.588762 | -0.531684 | 0.000041  |
| C | 3.003869 | 1.867946  | 0.000068  |
| C | 3.971552 | -0.753922 | 0.000058  |
| C | 4.357665 | 1.633109  | 0.000086  |
| H | 2.608937 | 2.876719  | 0.000070  |
| C | 4.856178 | 0.312137  | 0.000083  |
| H | 4.348453 | -1.770705 | 0.000051  |
| H | 5.049049 | 2.467842  | 0.000103  |
| H | 5.923575 | 0.129776  | 0.000097  |

---

**Molecular Orbital Pictures of Lowest Excited Angular Phenothiazine**

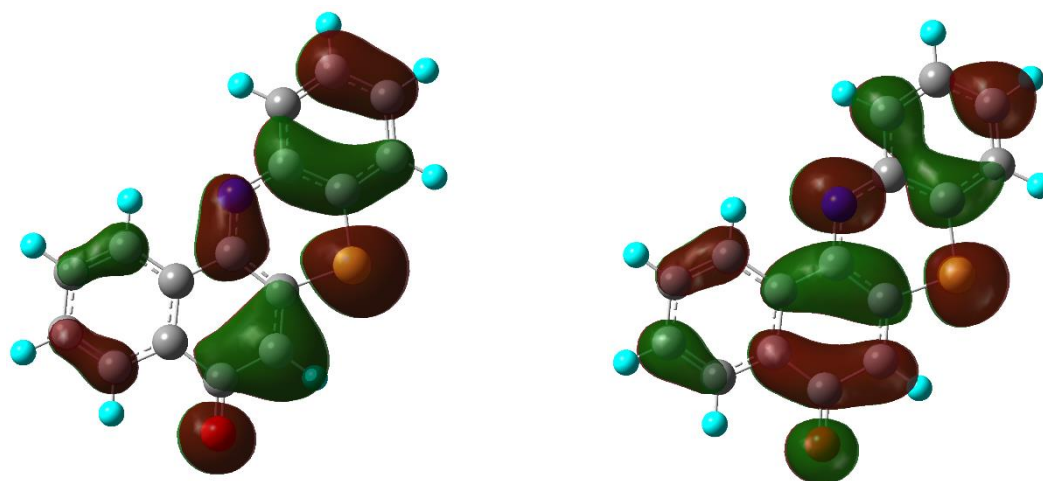

**Figure S19.** HOMO (left) and LUMO (right) pictures of the **lowest excited singlet state angular phenothiazine 1a**

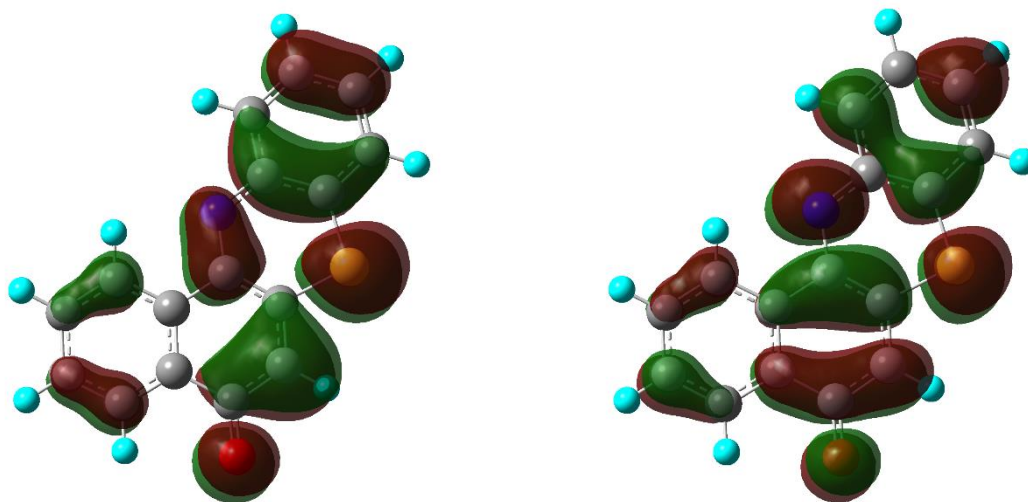

**Figure S20.** HOMO (left) and LUMO (right) pictures of the **lowest excited triplet state angular phenothiazine 1a**

Through these calculations, we found the following energy details:

| State of Phenothiazine | Electronic + Thermal Free Energies | Relative Free Energy (eV) |
|------------------------|------------------------------------|---------------------------|
| Singlet Excited State  | -1143.267953                       | 2.20                      |
| Triplet Excited State  | -1143.307452                       | 1.13                      |
| Singlet Ground State   | -1143.348964                       | 0.0                       |

Based on our computational studies, we observed that the energy difference between the singlet ground state and singlet excited state of angular phenothiazine **1a** is 2.20 eV, which is well corroborated with the experimental result which we have observed through the emission study as angular phenothiazine molecule is emitting at 613 nm ( $\sim 2.02$  eV). Further, the lowest singlet excited state angular phenothiazine having  $n,\pi^*$  character gets relieved by 1.1 eV to the lowest triplet excited state angular phenothiazine having  $n,\pi^*$  character through the intersystem crossing, as the energy gap is sufficiently small which allows them to the intersystem crossing from S1 ( $n,\pi^*$ ) to T1 ( $n,\pi^*$ ). A similar phenomenon was also reported by Kochi and co-workers, where they have explored the photoexcited singlet quinones and their ultrafast electron transfer *vs* intersystem crossing (ISC) rates.<sup>3</sup>

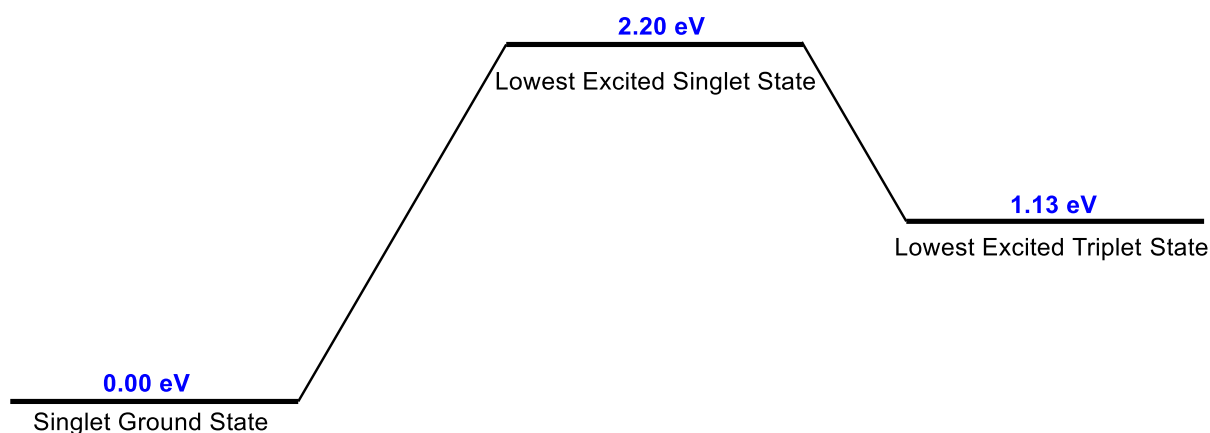

**Scheme S5.** Energy profile diagram of ground and lowest excited state of angular phenothiazine **1a**.

## 10. HPLC Experiment for Light-irradiated [2+2] Cyclo-reversion Reaction:

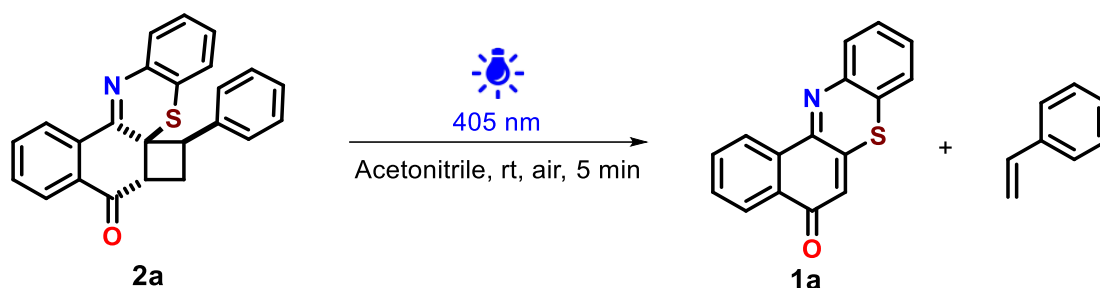

**Scheme S6.** Light-irradiated (405 nm external laser source (*vide supra*)) [2+2] cycloreversion of cyclobutylated phenothiazine **2a** into its precursors: angular phenothiazine **1a** and styrene

The HPLC experiments were performed in Waters Alliance e2695 separation module equipped with 2998 PDA detector. The chromatography was performed in reverse phase, in gradient mode, with Water: Acetonitrile (95:5 to 5:95) mobile phase for 15 minutes. The samples were passed through a C18 silica column with a flow rate of 1 ml/min. The peaks were observed and extracted at 254 nm. The working solutions of compounds namely, angular phenothiazine **1a** and cyclobutylated phenothiazine **2a** were 10  $\mu\text{M}$  in acetonitrile (Figure S21). Irradiation was achieved with the 405 nm external light source.

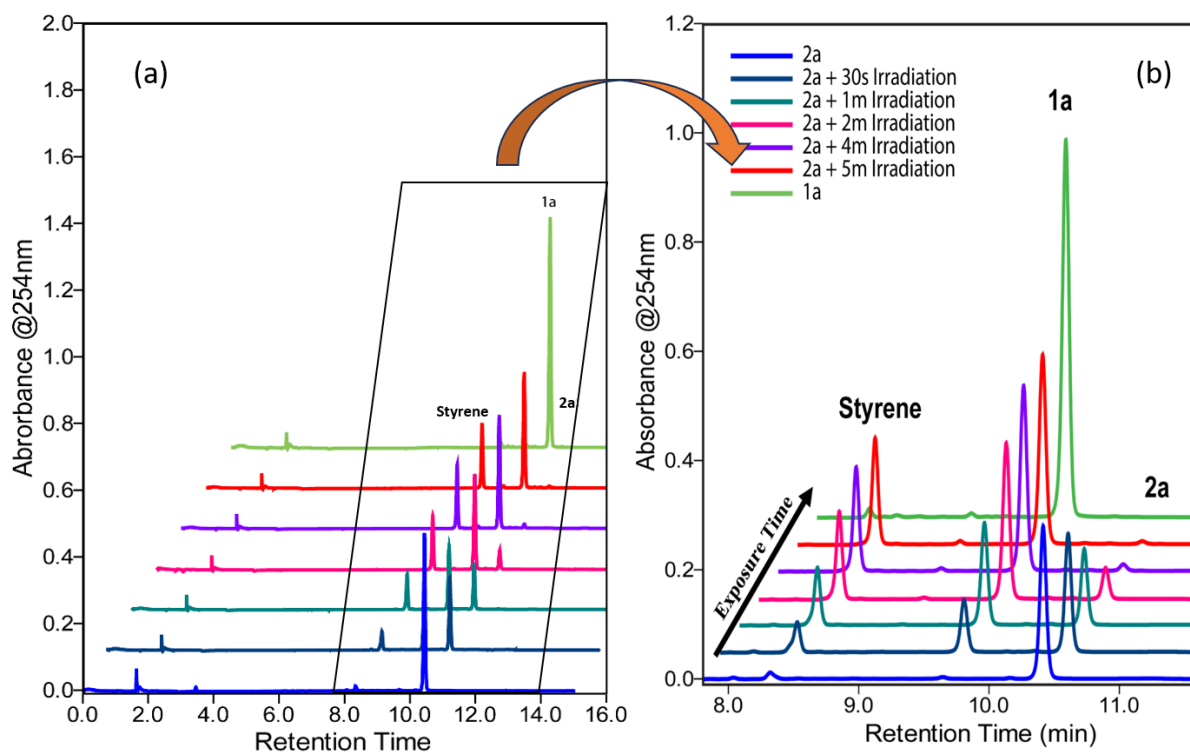

**Figure S21.** Time-dependent HPLC spectra for light-irradiated [2+2] cyclo-reversion Reaction reaction: (a) Full spectra of the run-time, (b) Zoomed-in Image

## 11. Structure-activity Relationship:

To gain a thorough understanding of the compound's structure-activity relationship i.e., the relation between the molecular structure and its cycloreversion as well as imaging activity, we have conducted a series of experiments involving substituted cyclobutylated phenothiazines to investigate the rate of their [2+2] cycloreversion reactions. Firstly, we monitored the time-dependent [2+2] cycloreversion reactions of *ortho*-fluoro, *meta*-fluoro, and *para*-fluoro substituted cyclobutylated phenothiazines **2b**, **2g** and **2l** to investigate the effect of the fluoro-substitution at *ortho*, *meta* and *para* positions, on the compound's [2+2] cycloreversion activity (Figure 22a). All the experiments were conducted by monitoring the time-dependent UV-absorption spectra of the cycloreversion reactions (5  $\mu\text{M}$  solution of each compound in acetonitrile solvent), under 405 nm light irradiation from an external laser source. Then the corresponding rates of the reaction have been calculated and compared (Figure 22a). Similarly, bromo (**2d**, **2i**, **2n**), methyl (**2e**, **2j**, **2o**), and methoxy substitutions (**2f**, **2k**, **2p**) at *ortho*-, *meta*- and *para*- positions of cyclobutylated phenothiazines were investigated (Figures 22b, 22c, 22d), respectively. We observed that in all cases, the *ortho*-substituted cyclobutylated phenothiazines are providing the highest rates (Figures 22a-22d). While the *meta*- substituents are the slowest and *para*-substituted products exhibited rates in between *ortho*- and *meta*- ones.

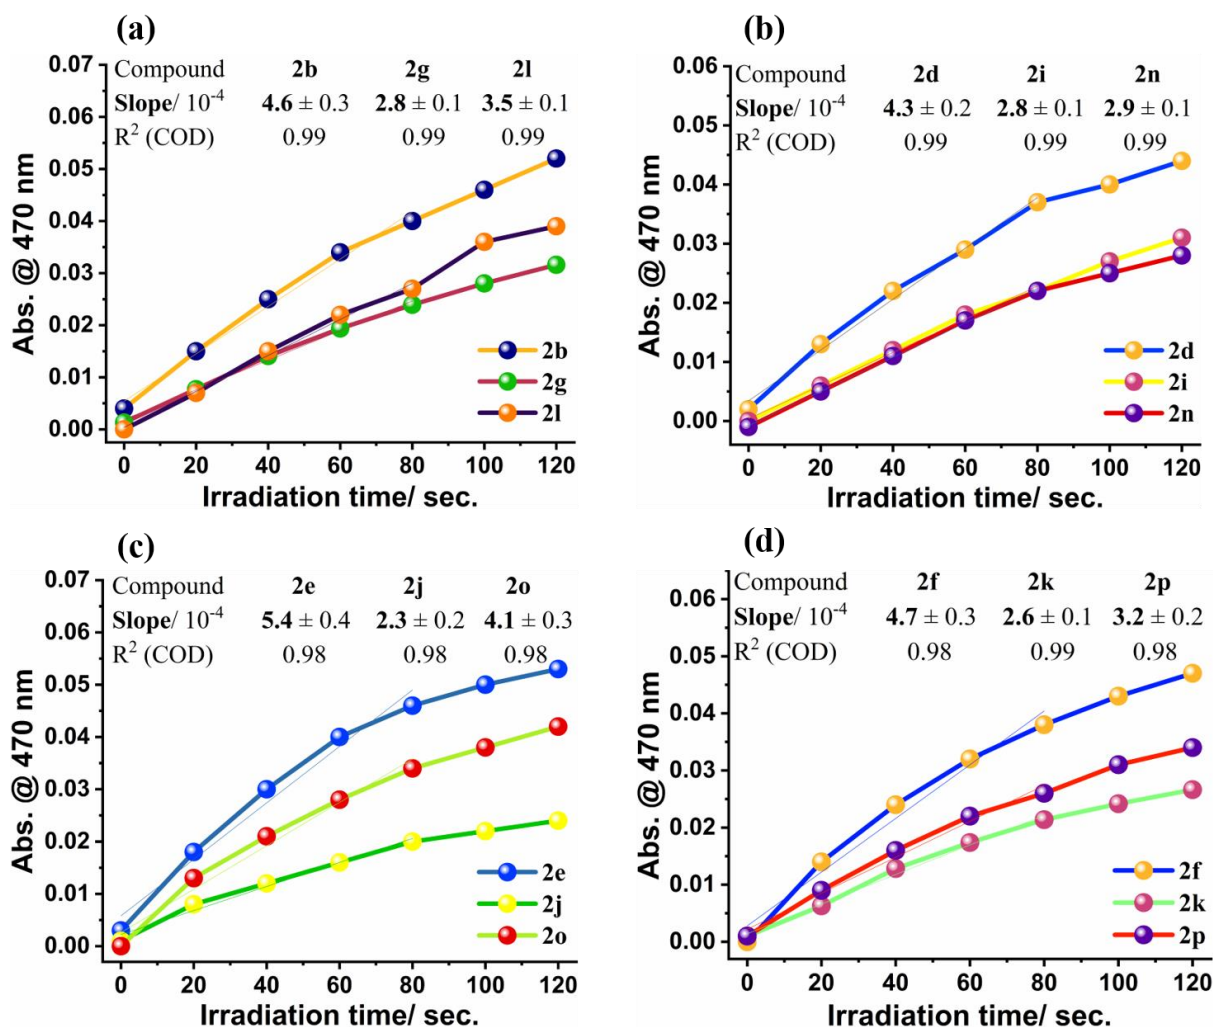

**Figure S22.** Rate of the [2+2] photocycloreversion reaction of variously substituted cyclobutylated phenothiazines. (a) *ortho*-, *meta*-, and *para*-fluoro substituted cyclobutylated phenothiazines **2b**, **2g**, **2l**; (b) *ortho*-, *meta*-, and *para*-bromo substituted cyclobutylated phenothiazines **2d**, **2i**, **2n**; (c) *ortho*-, *meta*-, and *para*-methyl substituted cyclobutylated phenothiazines **2e**, **2j**, **2o**; (d) *ortho*-, *meta*-, and *para*-methoxy substituted cyclobutylated phenothiazines **2f**, **2k**, **2p**.

The slope values reveal the rate constants of the reactions, showing that the *ortho*-methyl substituted cyclobutylated phenothiazine (**2e**) exhibits the highest rate of cycloreversion among the halogenated, methylated, and methoxylated compounds, whereas the *meta*-methyl substituted cyclobutylated phenothiazine (**2j**) displays the slowest rate.

Subsequently, we compared the rate of the photocycloreversion reaction of many other substituted-cyclobutylated phenothiazines (**2x**, **2v**, **2w**, **2q**, **2u**, **2ae**, **2s**, **2t**, **2af**, and **2y**) with respect to **2e** and **2j** (Figure 23).

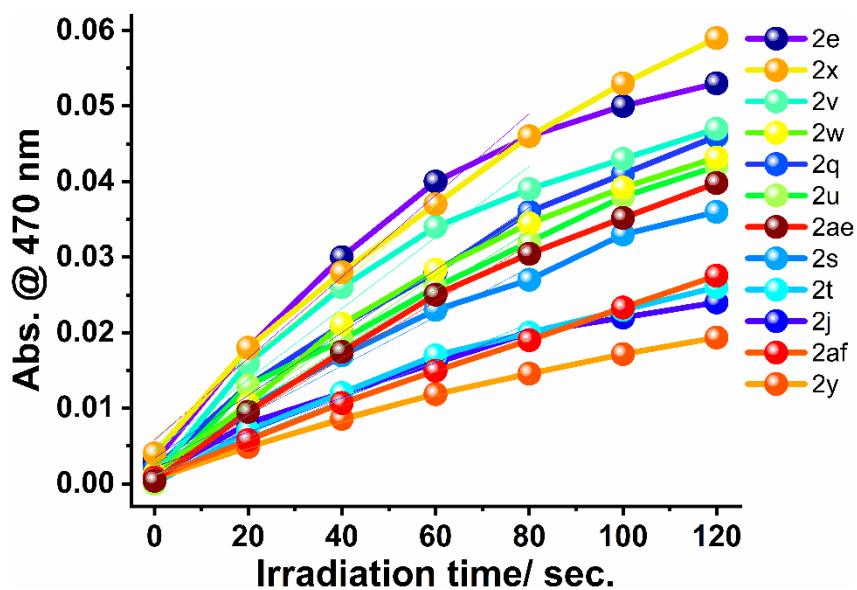

**Figure S23.** Comparison of the rate of [2+2] photocycloreversion of variously substituted-cyclobutylated phenothiazine with respect to **2e** and **2j**

Corresponding rate constants (slope) and  $R^2$  values from Figure 23 are given below:

| Compound   | Slope/ $10^{-4}$ | $R^2$ (COD) |
|------------|------------------|-------------|
| <b>2e</b>  | $5.4 \pm 0.4$    | 0.98        |
| <b>2x</b>  | $5.15 \pm 0.3$   | 0.99        |
| <b>2v</b>  | $4.7 \pm 0.5$    | 0.96        |
| <b>2w</b>  | $4.21 \pm 0.3$   | 0.99        |
| <b>2q</b>  | $4.15 \pm 0.2$   | 0.99        |
| <b>2u</b>  | $3.85 \pm 0.4$   | 0.97        |
| <b>2ae</b> | $3.8 \pm 0.2$    | 0.99        |
| <b>2s</b>  | $3.25 \pm 0.2$   | 0.98        |
| <b>2t</b>  | $2.5 \pm 0.2$    | 0.98        |
| <b>2j</b>  | $2.3 \pm 0.2$    | 0.98        |
| <b>2af</b> | $2.28 \pm 0.1$   | 0.99        |
| <b>2y</b>  | $1.7 \pm 0.1$    | 0.99        |

Where, COD = Coefficient of Determination



Here, it has been observed that *ortho*-methyl substituted cyclobutylated phenothiazine **2e** is exhibiting the highest rate of photocycloreversion with a rate constant of  $(5.4 \pm 0.4) \times 10^{-4} \text{ sec}^{-1}$  and rate of  $0.049 \mu\text{M sec}^{-1}$ . In contrast, the *trans*-stilbene fused cyclobutylated phenothiazine **2y** exhibited the slowest rate among all variants, with a rate constant of  $(1.7 \pm 0.1) \times 10^{-4} \text{ sec}^{-1}$  and rate of  $0.016 \mu\text{M sec}^{-1}$ . The photocycloreversion rates for both **2e** and **2y** were calculated over the initial 80 seconds of irradiation.

$$\text{Rate of reaction} = - \frac{\Delta(\text{Angular Phenothiazine})}{\Delta\text{time}}$$

$$\begin{aligned} \text{Rate of photocycloreversion of } \mathbf{2e} &= - \frac{\Delta(\text{Angular Phenothiazine})}{\Delta\text{time}} \\ &= - \frac{(3.9-0.0) \mu\text{M}}{(80-0) \text{ sec}} = -0.049 \mu\text{M sec}^{-1} \end{aligned}$$

Rate ( $v_o$ ) of formation of the angular phenothiazine by the [2+2] photocycloreversion of **2e** is:  $0.049 \mu\text{M sec}^{-1}$  (experiments have been repeated triplicate).

$$\begin{aligned} \text{Rate of photocycloreversion of } \mathbf{2y} &= - \frac{\Delta(\text{Angular Phenothiazine})}{\Delta\text{time}} \\ &= - \frac{(1.24-0.0) \mu\text{M}}{(80-0) \text{ sec}} = -0.016 \mu\text{M sec}^{-1} \end{aligned}$$

Rate ( $v_o$ ) of formation of the angular phenothiazine by the [2+2] photocycloreversion of **2e** is:  $0.016 \mu\text{M sec}^{-1}$  (experiments have been repeated triplicate).

Subsequently, we proceed to explore the structure-activity relationship in live HeLa cells. When the HeLa cells were treated with **2e**, no signal was detected from the cells prior to irradiation (Figure 24a). However, after 1 minute of irradiation, a significant enhancement in signal intensity was observed throughout the cells, which was visible in the FITC channel (Figure 24b). On the other hand, when the cells were incubated with **2y** and subjected to photo-irradiation, no distinguishable signal was observed in the FITC channel after 1 minute of irradiation (Figure 25a). Even after 5 minutes of irradiation, only a very weak emission signal was detected in the FITC channel (Figure 25b), suggesting that the stilbene-derived **2y** undergoes cycloreversion at a slower rate than *ortho*-methylated **2e** and takes longer time for cell imaging. Therefore, the cellular experimental observations were corroborated well with the corresponding spectroscopic evidence, demonstrating the structure-activity relationship.

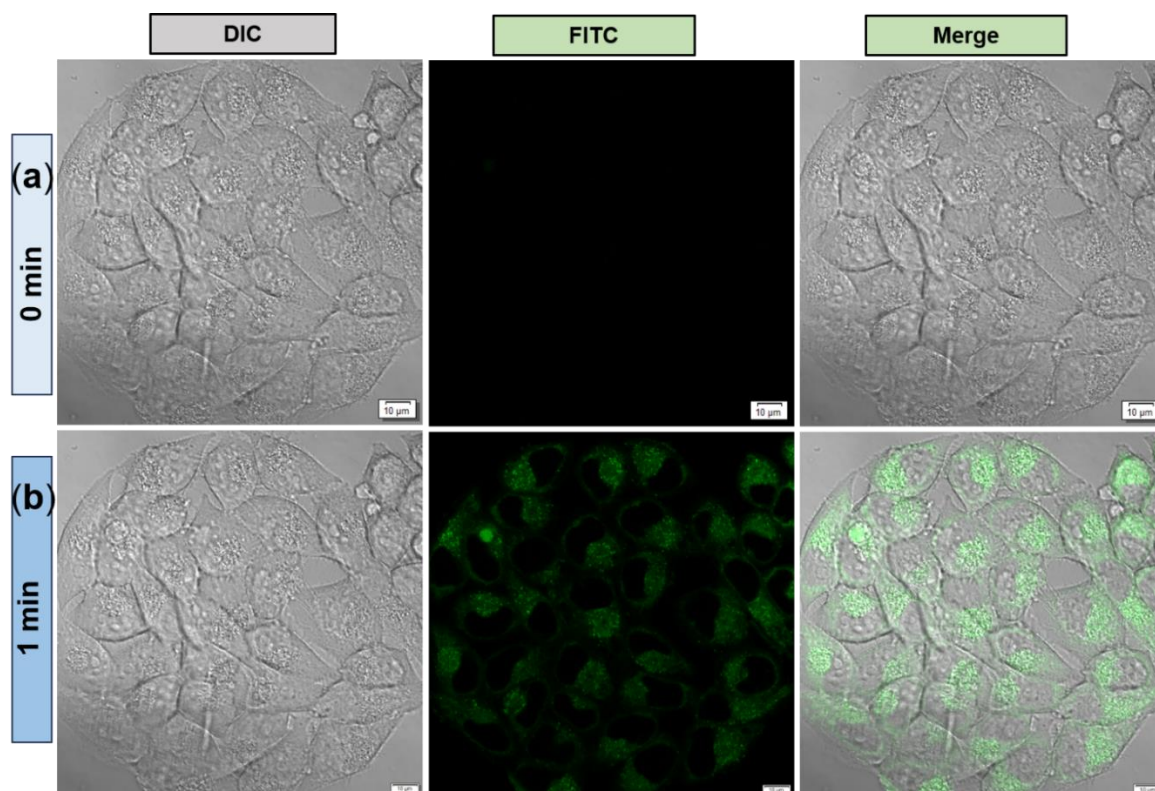

**Figure S24.** Confocal laser scanning microscopy (CLSM) images of HeLa cells after treatment with 5  $\mu\text{M}$  of probe **2e** upon without irradiation (upper panel) and with irradiation (lower panel)

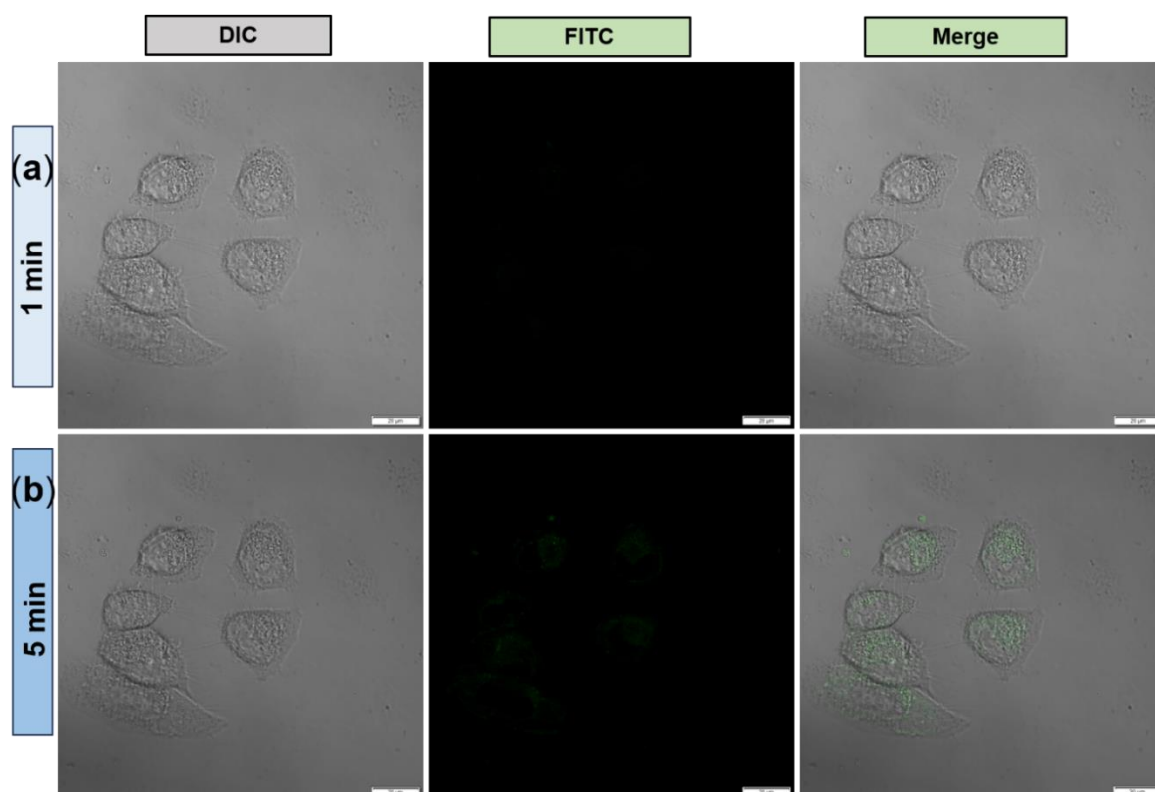

**Figure S25.** Confocal laser scanning microscopy (CLSM) images of HeLa cells after treatment with 5  $\mu\text{M}$  of probe **2y** upon 1 min irradiation (upper panel) and 5 min irradiation (lower panel).

## 12. Cell Culture, Imaging and Spectroscopy:

### Materials:

Dulbecco's modified Eagle's medium (DMEM) was purchased from Sigma-Aldrich (USA). Fetal bovine serum (FBS) and antibiotic cocktails were purchased from HiMedia (USA). The 35 mm glass-bottom imaging dishes were purchased from Ibidi (Germany). The image was processed with the help of cellSens Dimension software v3.2 (Olympus).

### Culture Method:

HeLa cell lines were obtained from the National Center for Cell Science, Pune, India, and were cultured in DMEM containing 10% (v/v) FBS and 1% (v/v) antibiotic cocktail in 5% CO<sub>2</sub> at 310 K (37 °C) in the incubator. For imaging, cells were grown in the 35 mm glass-bottom imaging dish for 24 h with 75 – 80% confluency.

### Cytotoxicity Assay:

Around 5,000 cells per well were seeded in a 96-well plate and grown for 24 h in 5% CO<sub>2</sub> at 310 K (37 °C) in the incubator. After that, cells were stained with the angular phenothiazine **1a** and the cyclobutylated phenothiazine **2a** from stock solution in DMSO (1 mM). The added amount of DMSO was not more than 2 μL. After 24 h of incubation, 20 μL of MTT (3-(4,5-dimethylthiazol-2-yl)-2,5-diphenyl tetrazolium bromide) dye solution (from a stock of 5 mg/mL in PBS 7.4 buffer) was added to each well and incubated for 4 h. The media was removed gently from each well, and 100 μL DMSO was added to each well to dissolve the purple-colored crystal. The absorbance at 570 nm was recorded in a Synergy H1 Hybrid multi-mode microplate reader from Biotek.

### Sample Preparation for Cell Imaging:

**For Cellular Localization of the Angular Phenothiazine 1a and Cyclobutylated Phenothiazines 2a:** From 1 mM DMSO stock solution of the angular phenothiazine **1a** or the cyclobutylated phenothiazine **2a**, 5 μL was taken, and added to 1 mL of phosphate-buffered saline (PBS 1X, pH 7.4) in a 1.5 mL Eppendorf tube. From these, 500 μL solution was added to a 35 mm glass-bottom imaging dish containing HeLa cells (the final concentration of both the probes in the incubating solution = 5 μM). The cells were then incubated for 15 min at 37 °C, thereafter, the cells were washed with PBS 1X (pH 7.4) twice before imaging. The imaging

was performed in 1X PBS (pH 7.4) supplemented with 5 mM MgCl<sub>2</sub>. The rest of the procedure for imaging study is the same as above.

#### **For Intracellular [2+2] Photocycloreversion Reaction:**

This experiment was done by using the cyclobutylated phenothiazine probe **2a** in HeLa cells. After staining the cells with 5  $\mu$ M of the same probe, a particular field of view (FOV) was selected, and cells were imaged. Thereafter, a 405 nm external laser source (*vide supra*) was used to irradiate the cells for the required period and imaged accordingly. The imaging dish was not disturbed and therefore, the FOV was kept the same throughout the experiment.

#### **For Endocytosis Study:**

HeLa cells were cultured for 24 h, and then, the cells were pre-treated at 37 °C (control group) and 4 °C for 2 h. After washing two times with PBS solution, the cells were incubated with 5  $\mu$ M of the angular phenothiazine **1a** in DMEM media for 15 minutes, followed by washing. For the cellular uptake mechanism, five inhibitors were applied to block the endocytic pathway. HeLa cells were pre-treated at 37 °C with the DMEM media containing 100  $\mu$ M chloroquine, 30  $\mu$ M chlorpromazine, 500  $\mu$ M M $\beta$ CD and 200  $\mu$ M amiloride for 2 h, and 5  $\mu$ M cytochalasin-D for 15 minutes, washed two times with PBS solution. Further cells with 5  $\mu$ M of the angular phenothiazine **1a** in DMEM media for 15 minutes followed via washing with PBS solution and then imaged under the microscope.

#### **Confocal Microscopy:**

All the confocal imaging was performed with an Olympus FV3000 confocal laser scanning microscope (CLSM). For both the angular phenothiazine **1a** and cyclobutylated phenothiazine **2a**, 488 nm excitation lasers were used with 1% laser (max. power = 20 mW). The confocal aperture was kept at 1 Airy Disk (AU) unit, while the dwell time was 8  $\mu$ s/pixel. The image acquisition was performed in a sequential scanning mode to eliminate the possibility of crosstalk and bleed-through between different imaging channels.

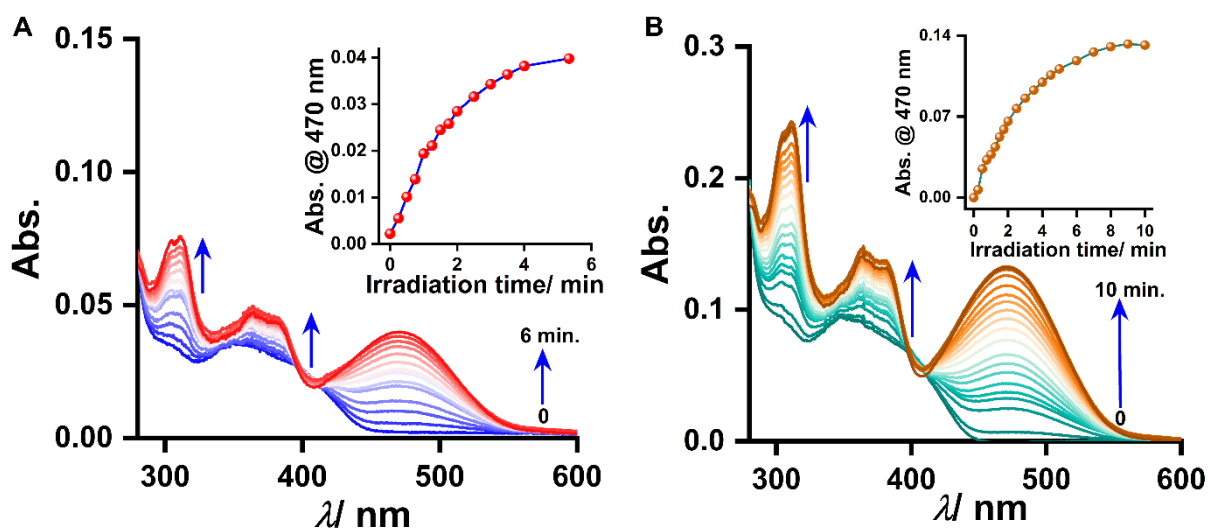

**Figure S26.** Time-dependent UV-Vis absorption spectra in acetonitrile upon irradiation with visible light at different times, (A) for 5  $\mu\text{M}$  concentration; (B) for 20  $\mu\text{M}$  concentration of the cyclobutylated phenothiazine **2a**

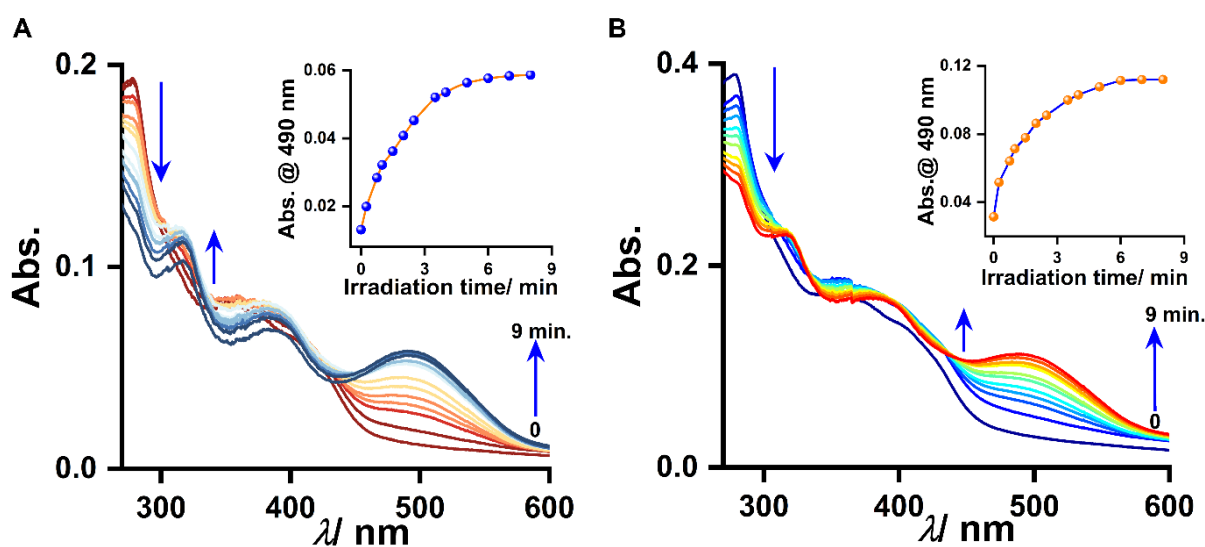

**Figure S27.** Time-dependent UV-visible absorption spectra in PBS solution (pH 7.4) upon irradiation with visible light at different times, (A) for 10  $\mu\text{M}$  concentration; (B) for 20  $\mu\text{M}$  concentration of the cyclobutylated phenothiazine **2a**

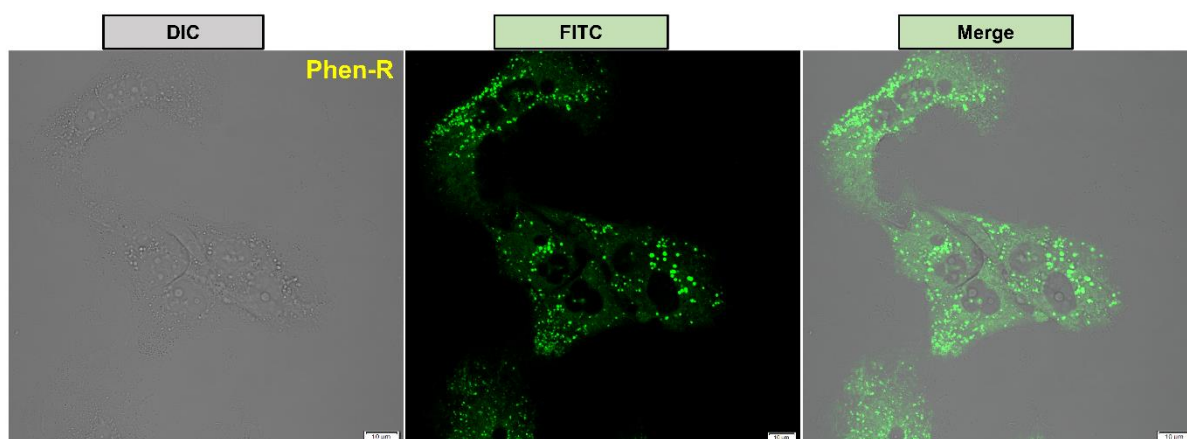

**Figure S28.** Confocal laser scanning microscopy (CLSM) images of HeLa cells after treatment with 5  $\mu\text{M}$  of the angular phenothiazine probe **1a**, Scale bar = 10  $\mu\text{m}$

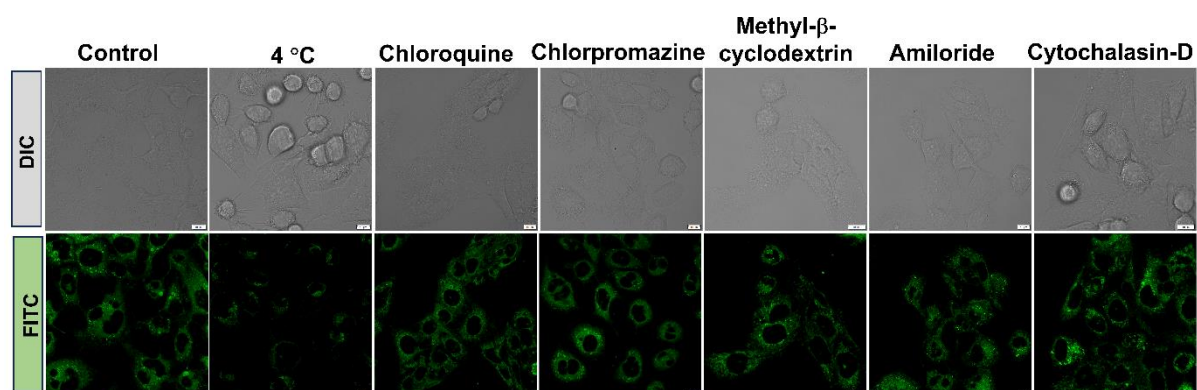

**Figure S29.** Effects of temperature and different endocytosis inhibitors (100  $\mu\text{M}$  chloroquine, 30  $\mu\text{M}$  chlorpromazine, 500  $\mu\text{M}$  M $\beta$ CD, 200  $\mu\text{M}$  amiloride, and 5  $\mu\text{M}$  cytochalasin-D) with 5  $\mu\text{M}$  of the angular phenothiazine probe **1a** in HeLa cells were analysed by confocal microscopys

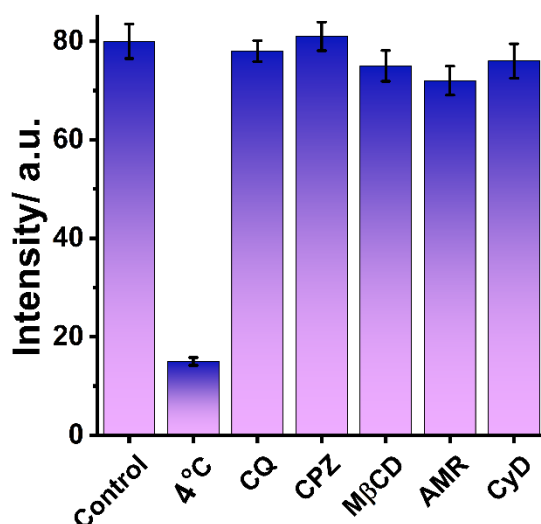

**Figure S30.** The bar plot shows the average fluorescence intensities in HeLa cells in the control set, incubated at low temperature, and when treated with different endocytosis inhibitors

### UV-Vis Spectra of the Ibuprofen-Coupled Cyclobutylated Phenothiazine **2am**

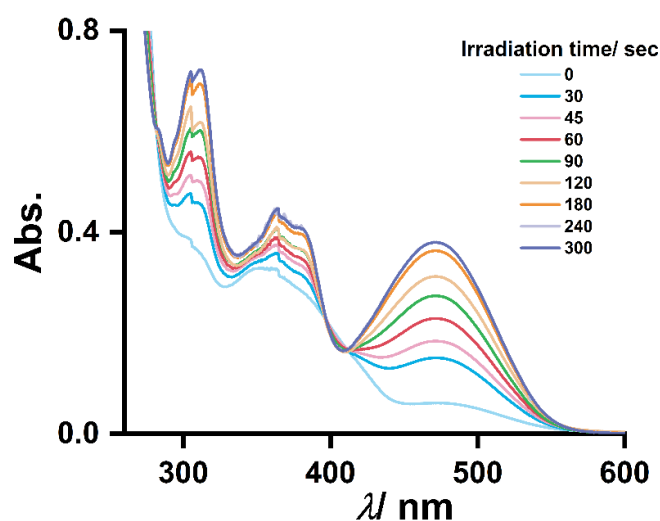

**Figure S31.** Time-dependent UV-vis absorption spectra of 10  $\mu$ M **2am** in acetonitrile upon irradiation with a 405 nm external laser source

Prior to any light exposure, the ibuprofen-coupled cyclobutylated phenothiazine **2am** displays featureless, broad absorption spectra spanning from 322 nm to 455 nm, with minimal absorbance in longer wavelength regions. Upon being subjected to an external laser source of 405 nm for 30 seconds, the absorbance values gradually increase beyond 455 nm and within

the range of 290 nm to 455 nm. Further exposure to the same light, generates a well-defined vibronic feature, with an absorption band peaking at 470 nm, perfectly mirroring the absorption spectrum of its precursor namely, angular phenothiazine **1a** in acetonitrile (Figure S31). After 5 minutes of light exposure, the spectrum becomes saturated, and no further change in absorbance values was observed.

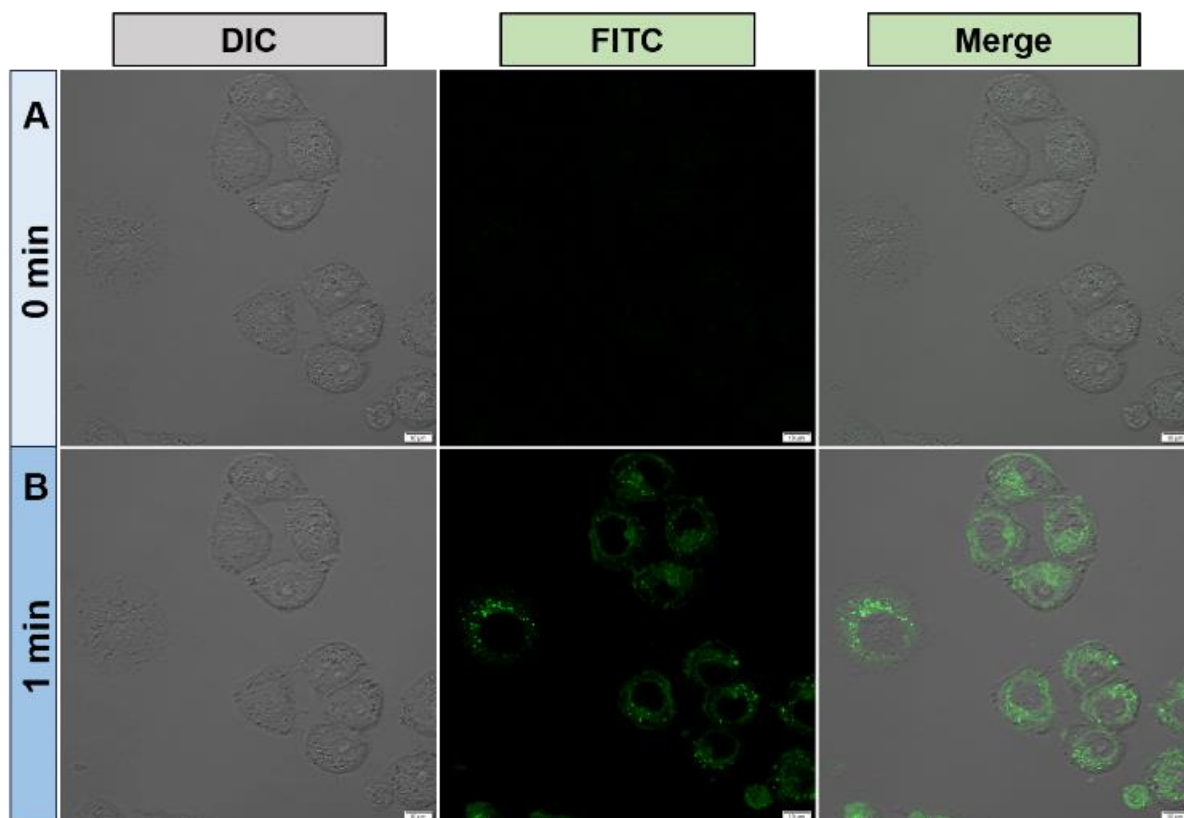

**Figure S32.** Confocal laser scanning microscopy (CLSM) images of HeLa cells after treatment with 5  $\mu\text{M}$  of the ibuprofen-coupled cyclobutylated phenothiazine derivative **2am** upon irradiation without (upper panel: A) and with (lower panel: B) light. Scale bar = 10  $\mu\text{m}$



### 13. Spectroscopic Characterization of Synthesized Compounds using NMR Analysis:

<sup>1</sup>H NMR spectra of **1a**

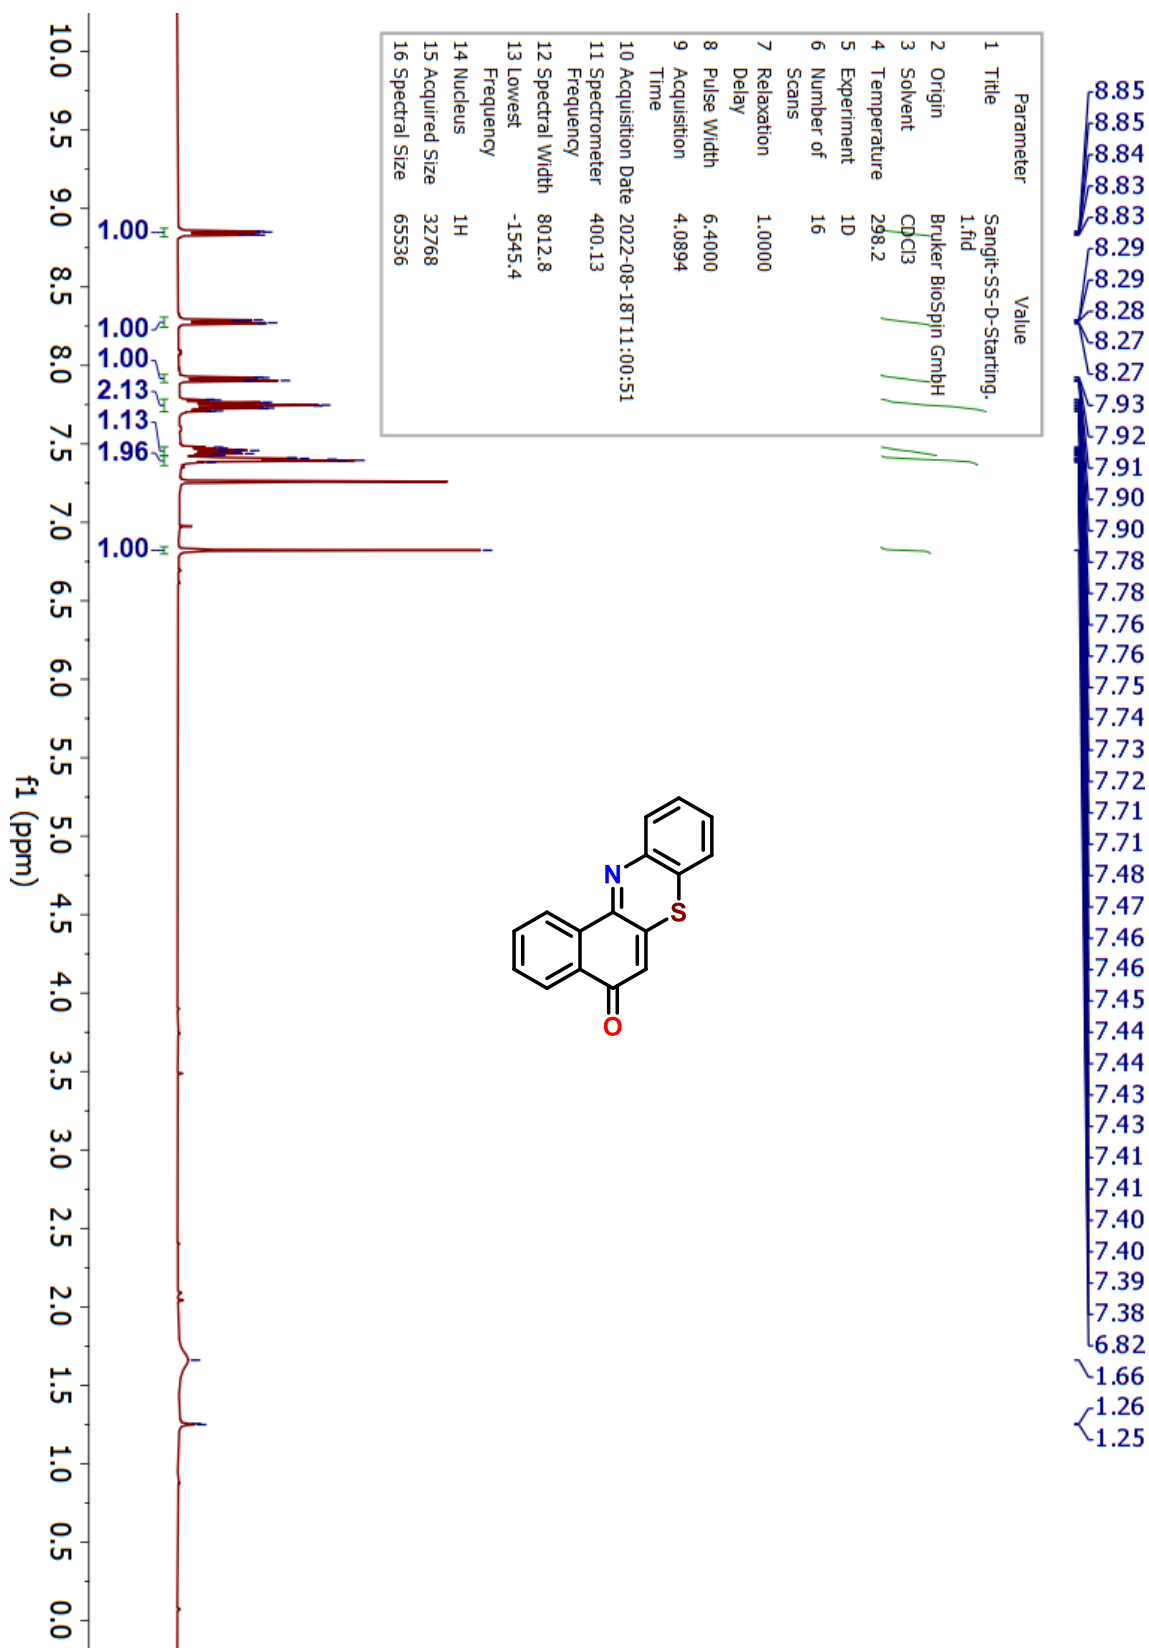

$^{13}\text{C}\{^1\text{H}\}$  NMR spectra of **1a**

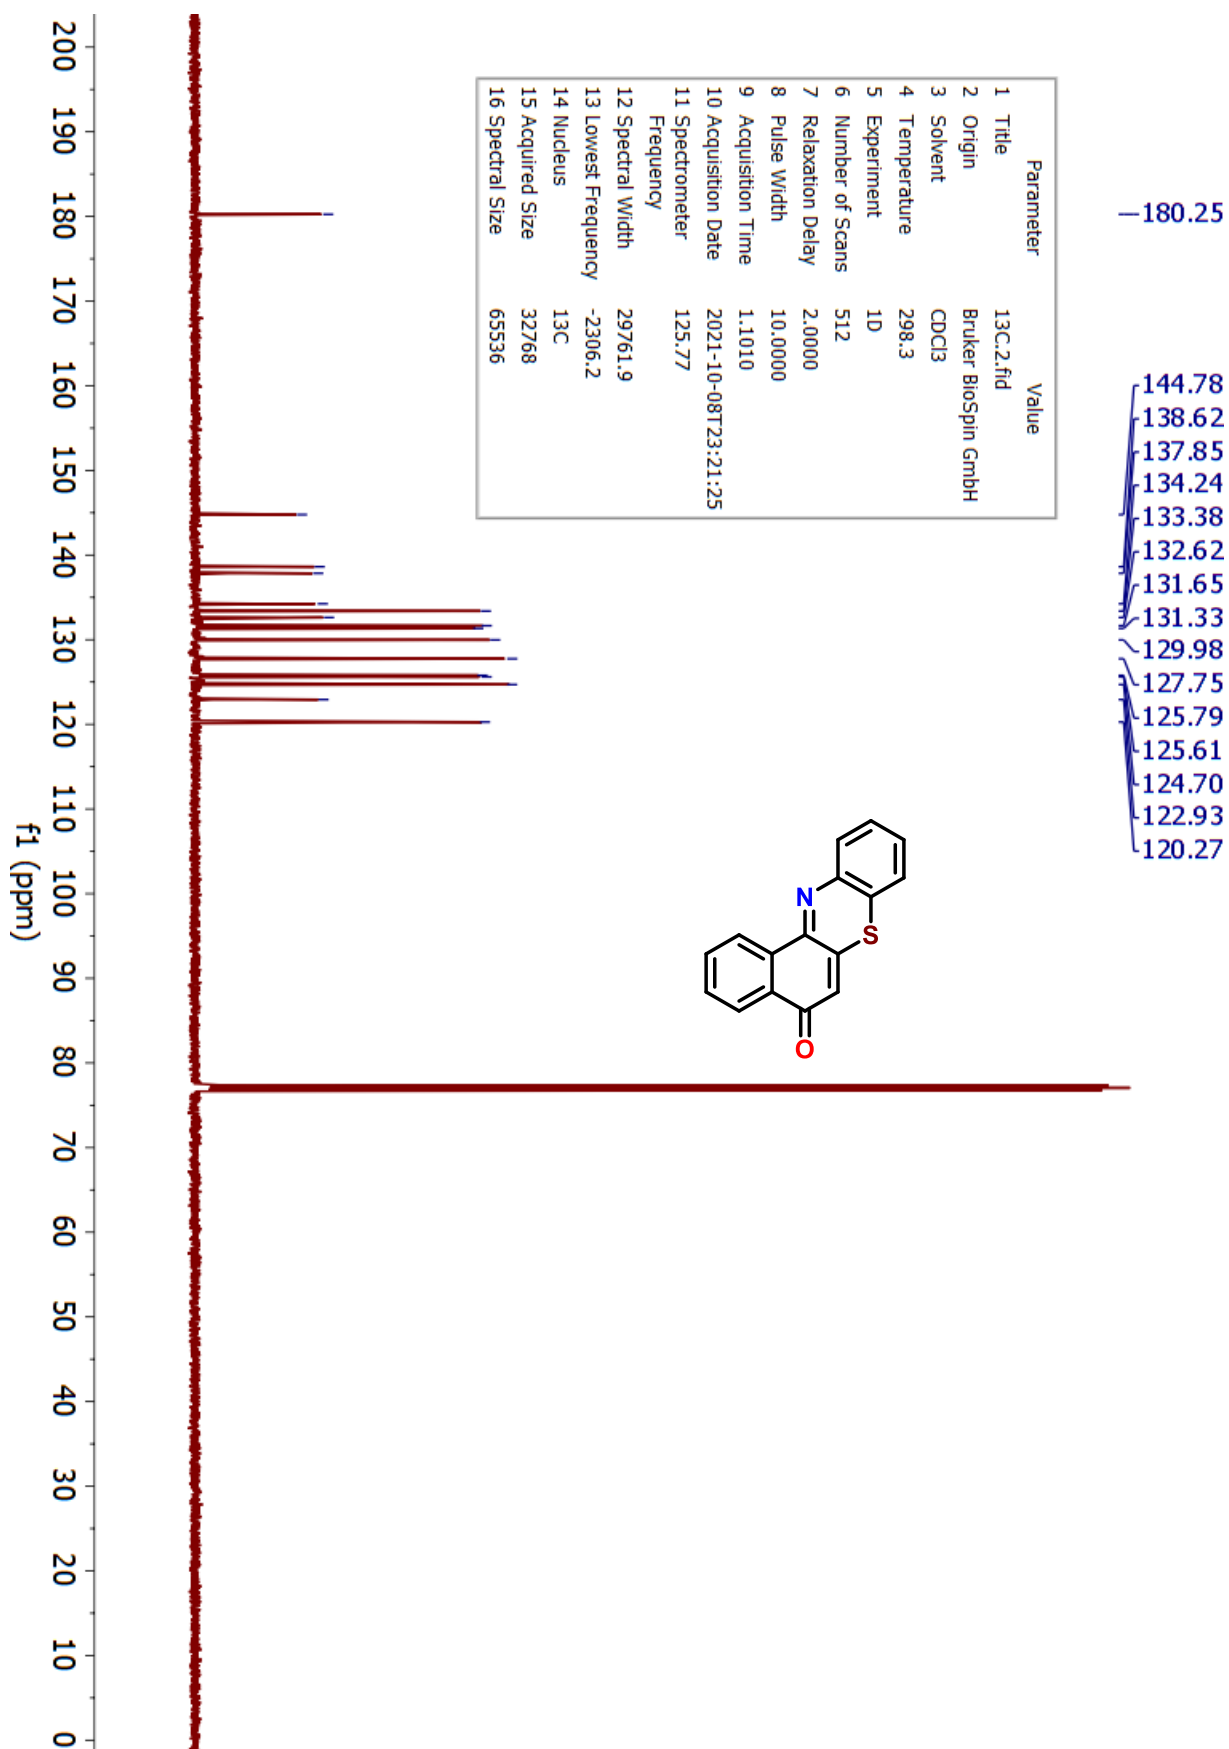

<sup>1</sup>H NMR spectra of **1ac**

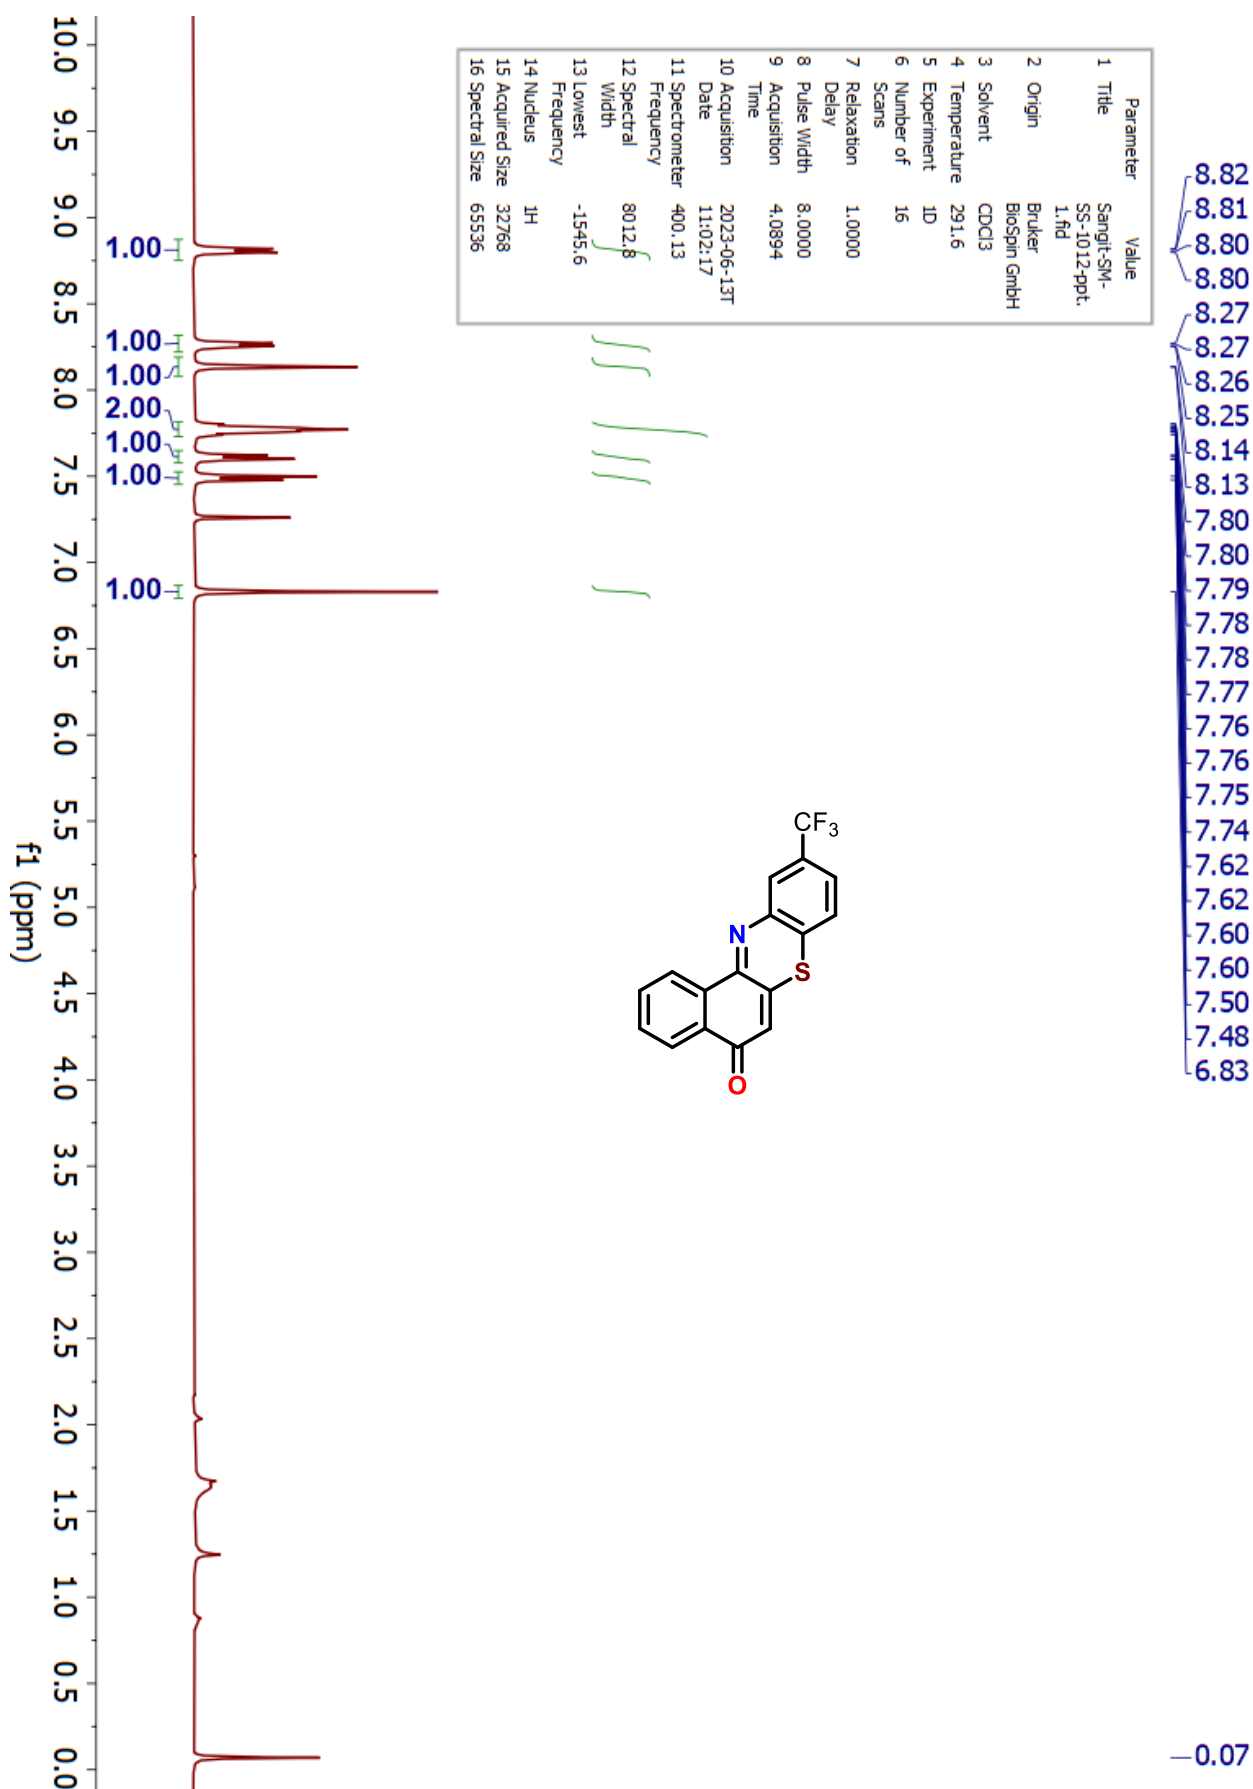

$^{13}\text{C}\{^1\text{H}\}$  NMR spectra of **1ac**

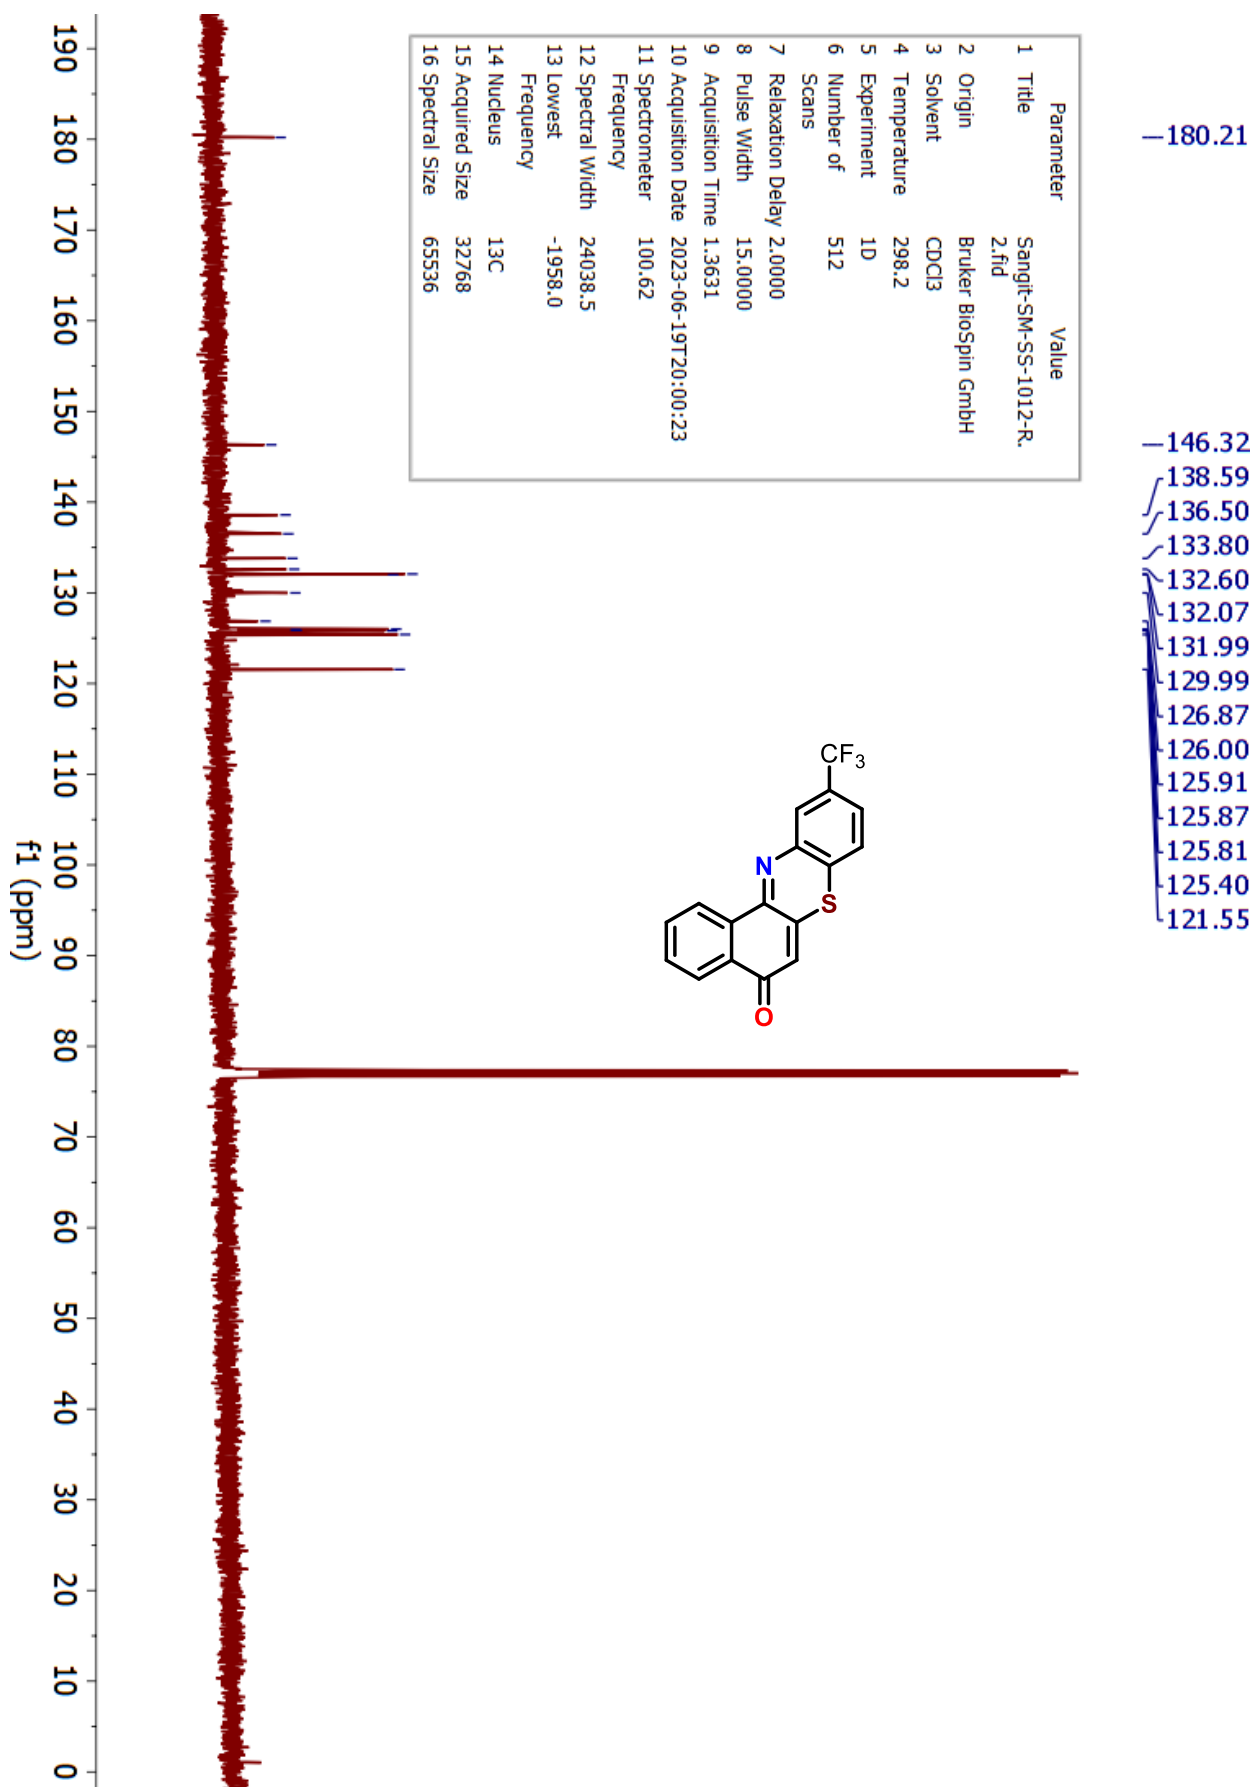

$^{19}\text{F}\{^1\text{H}\}$  NMR spectra **1ac**

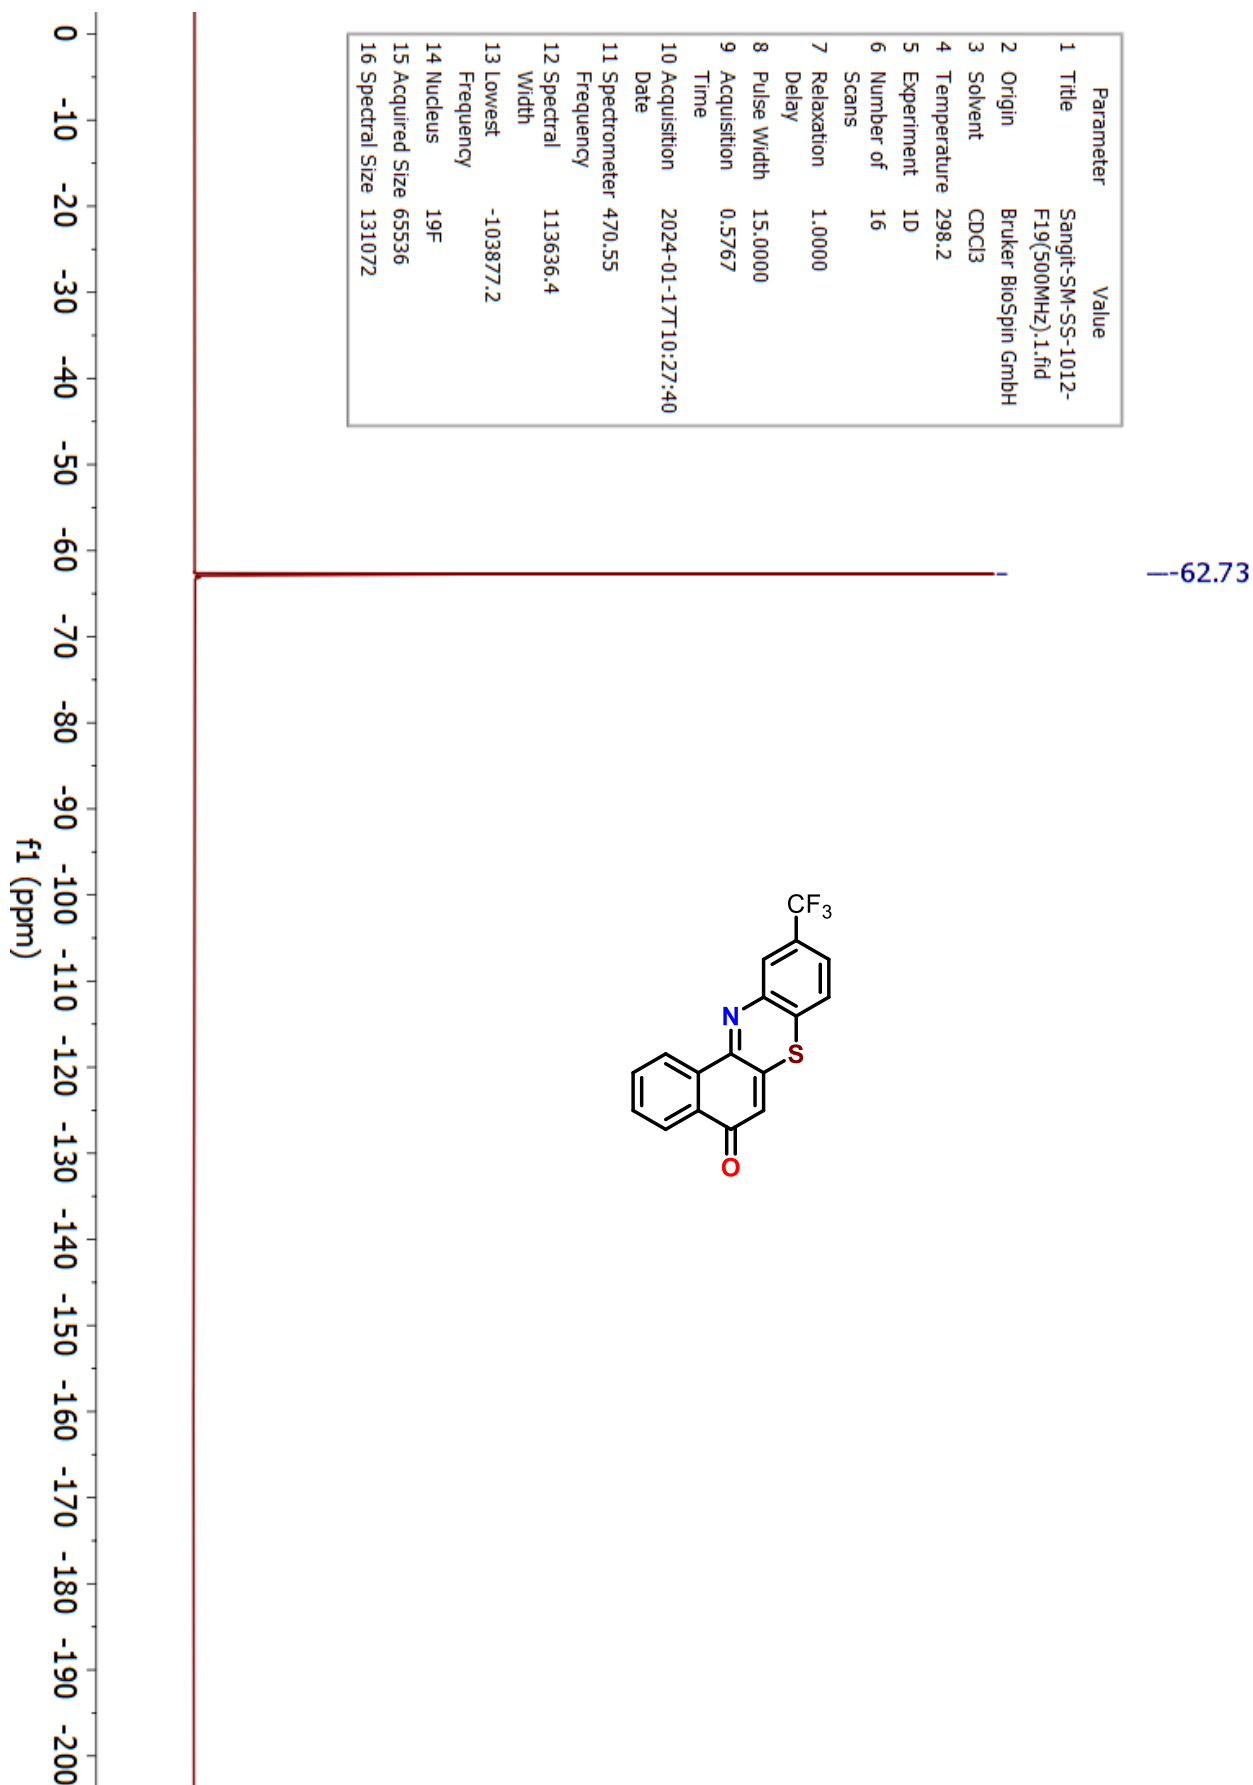

<sup>1</sup>H NMR spectra of **2a**

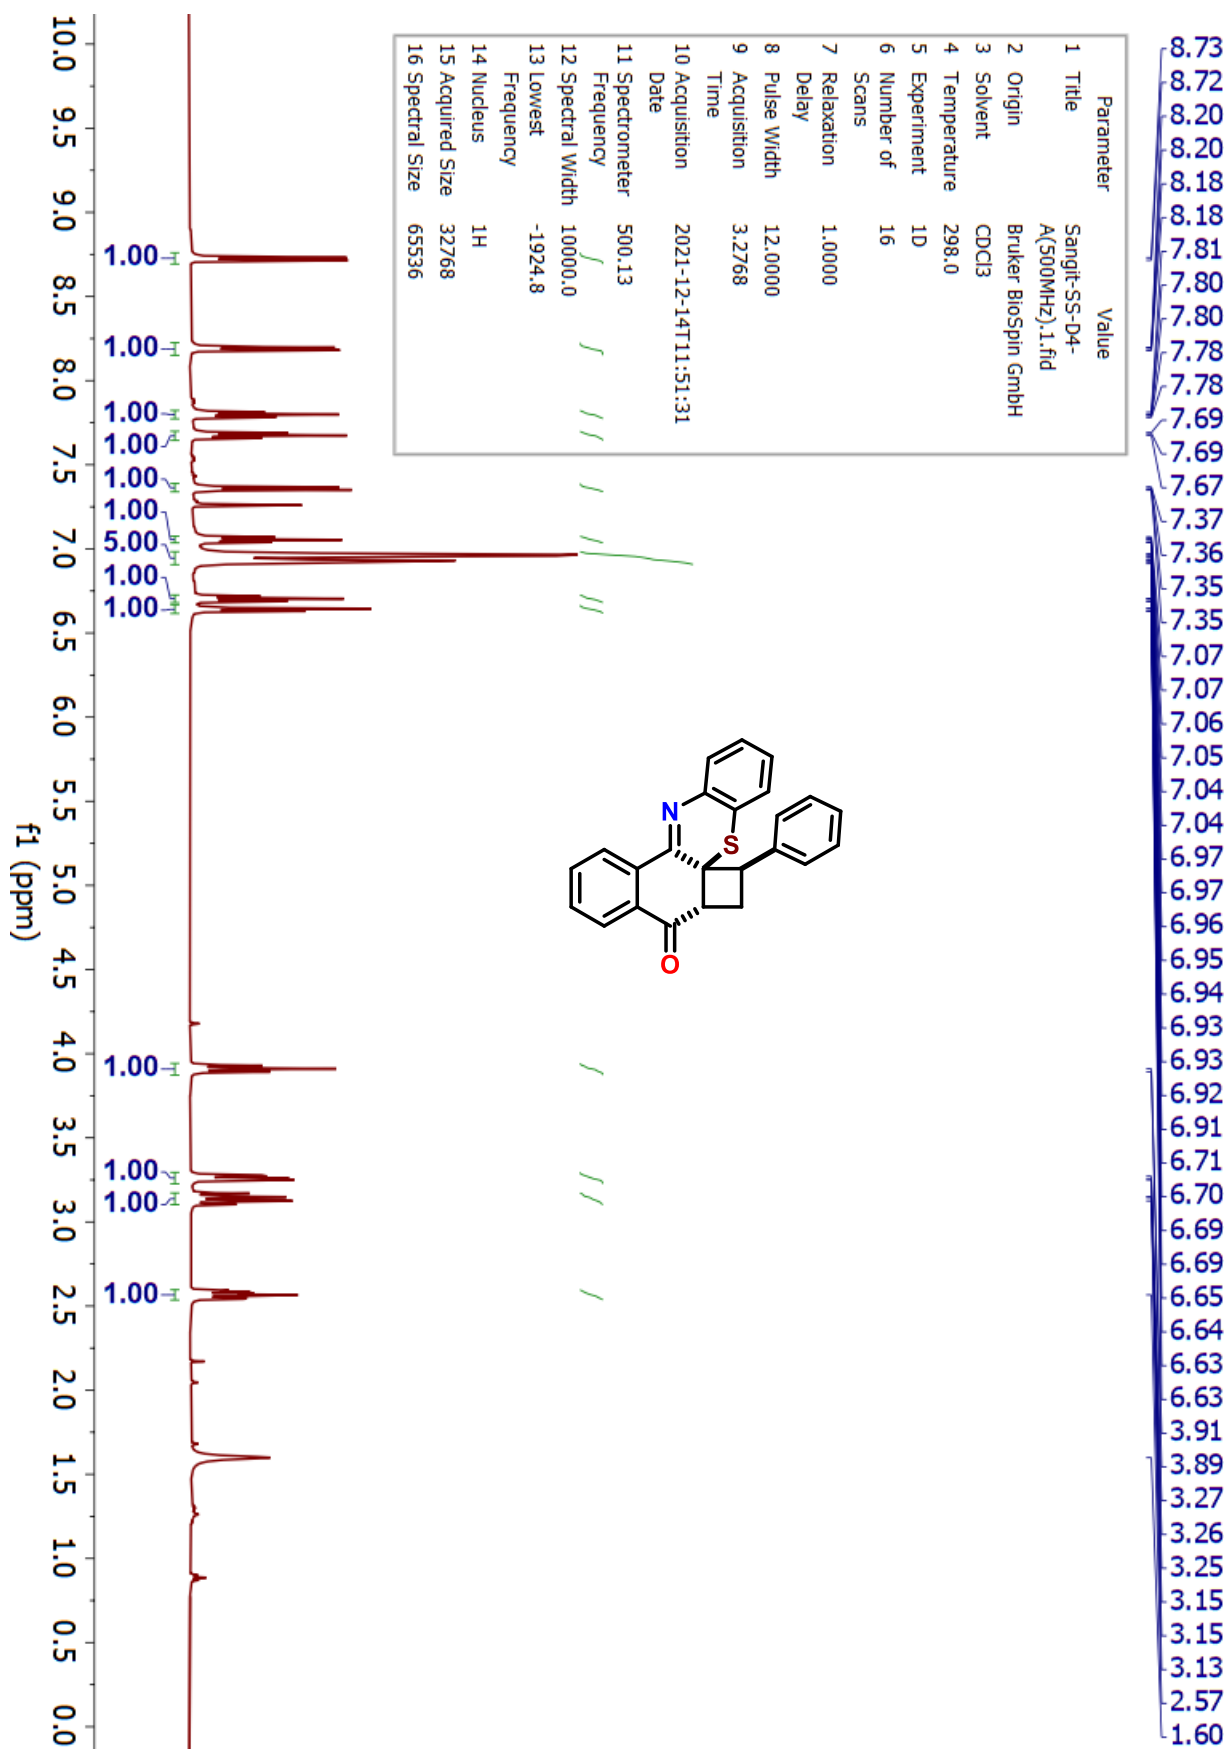

$^{13}\text{C}\{^1\text{H}\}$  NMR spectra of **2a**

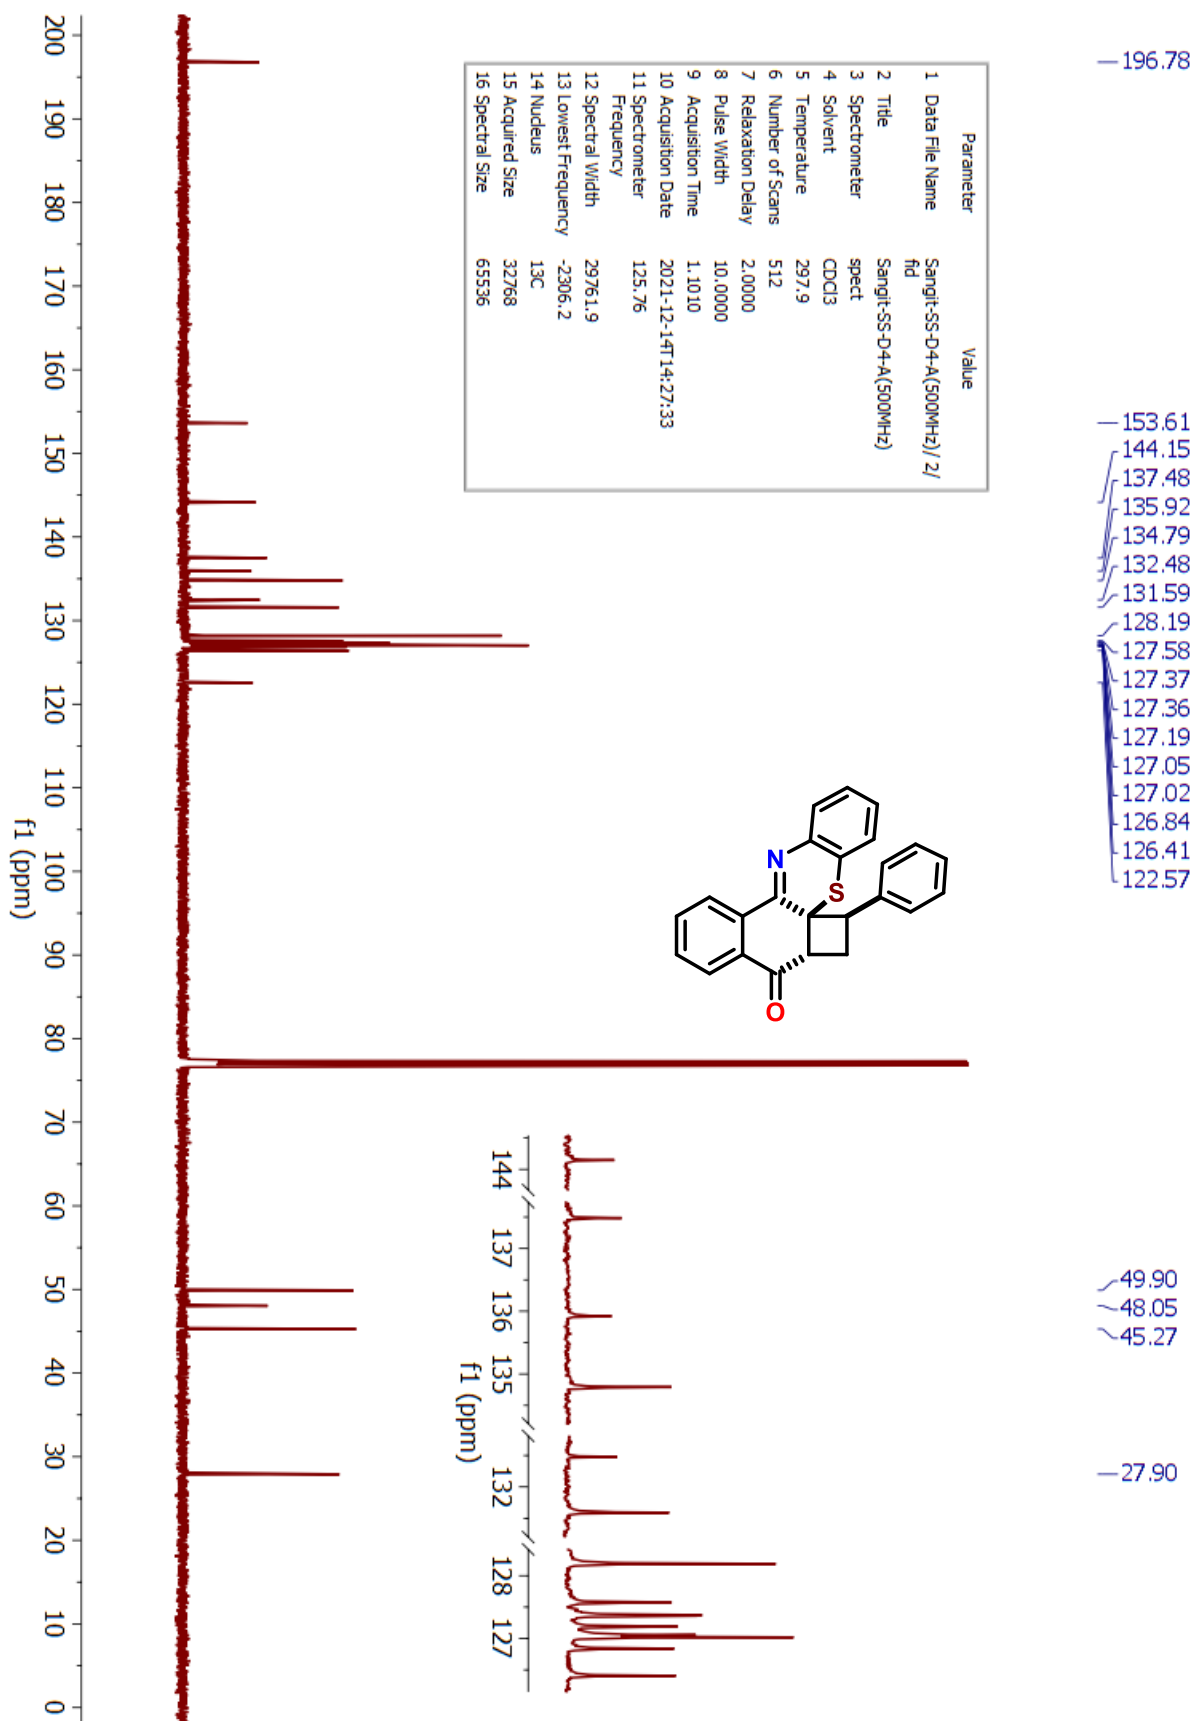

<sup>1</sup>H NMR spectra of **2b**

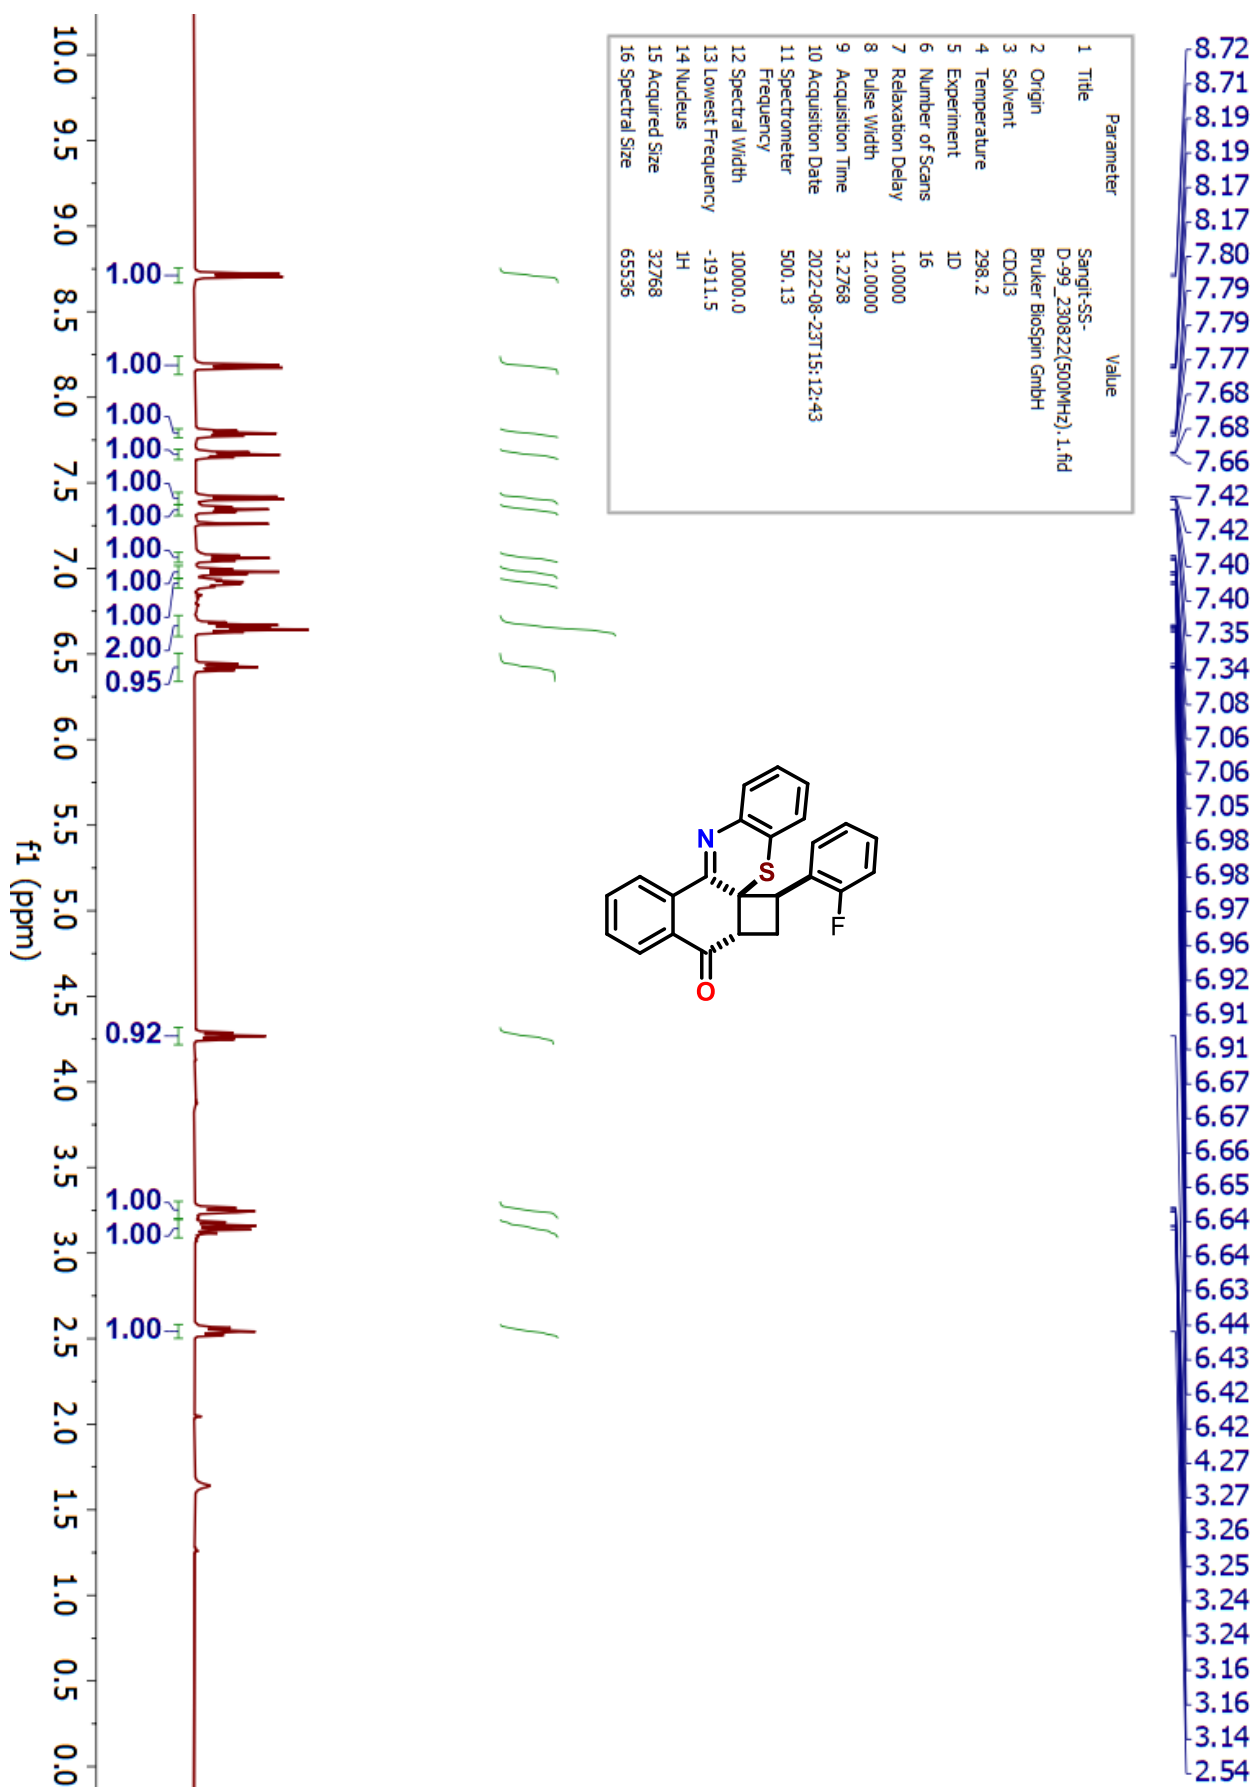



$^{13}\text{C}\{^1\text{H}\}$  NMR spectra of **2b**

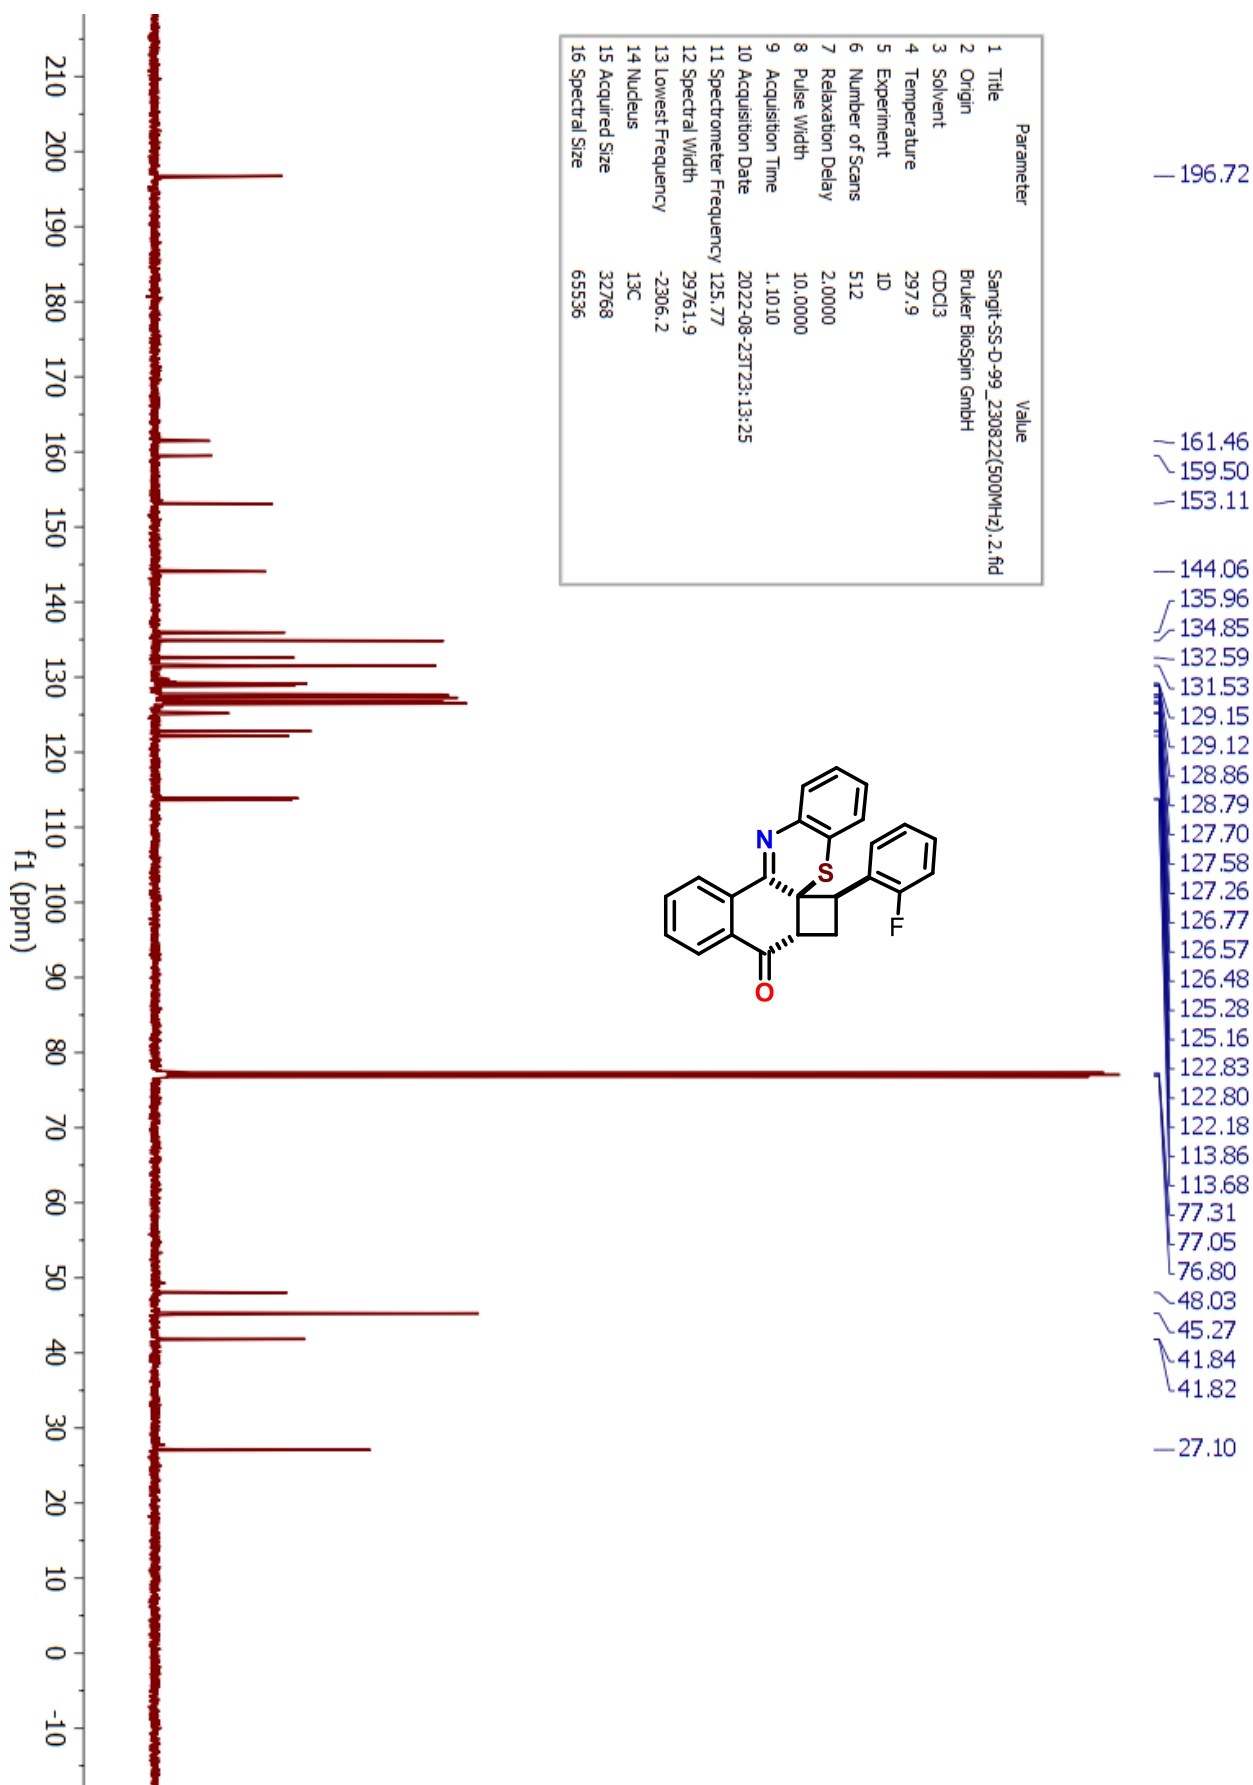

$^{19}\text{F}\{^1\text{H}\}$  NMR spectra of **2b**

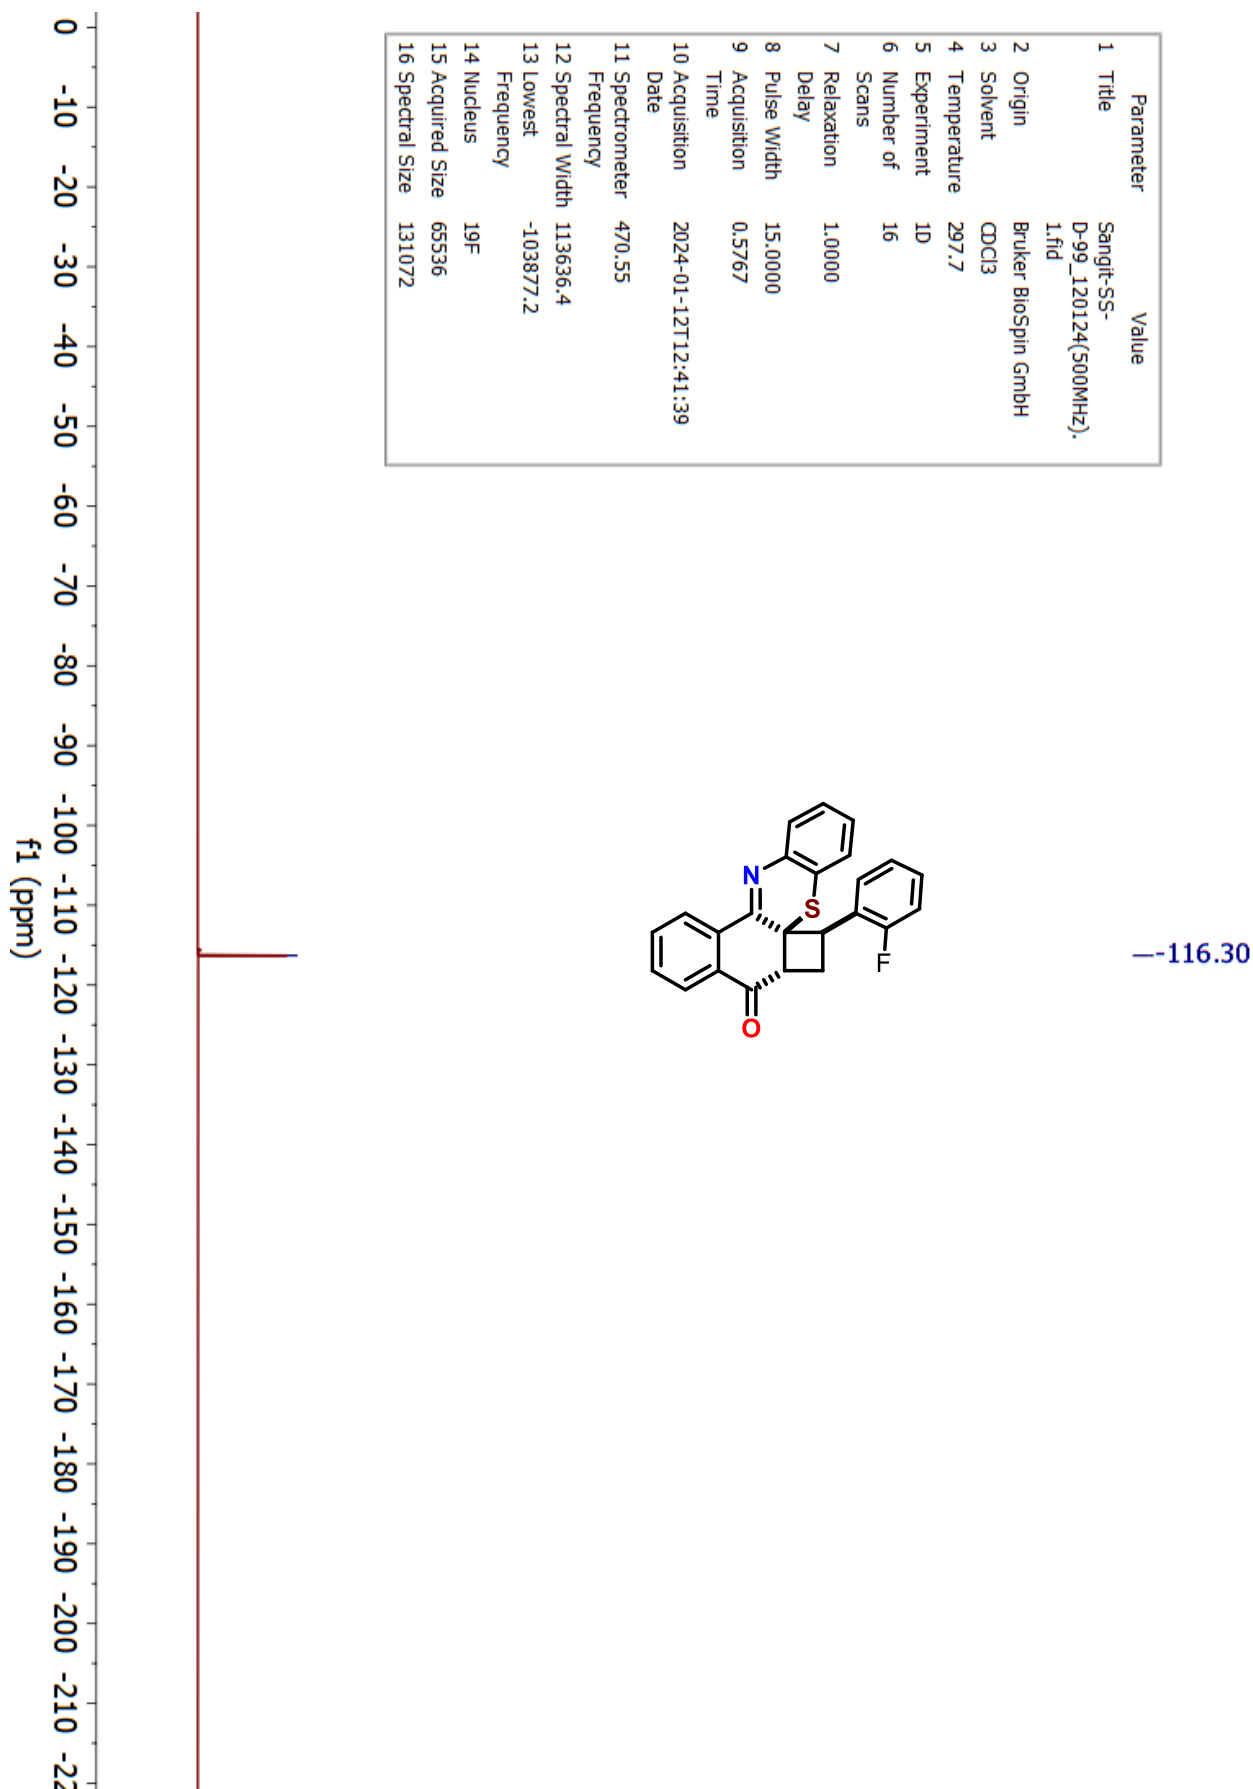

<sup>1</sup>H NMR spectra of **2c**

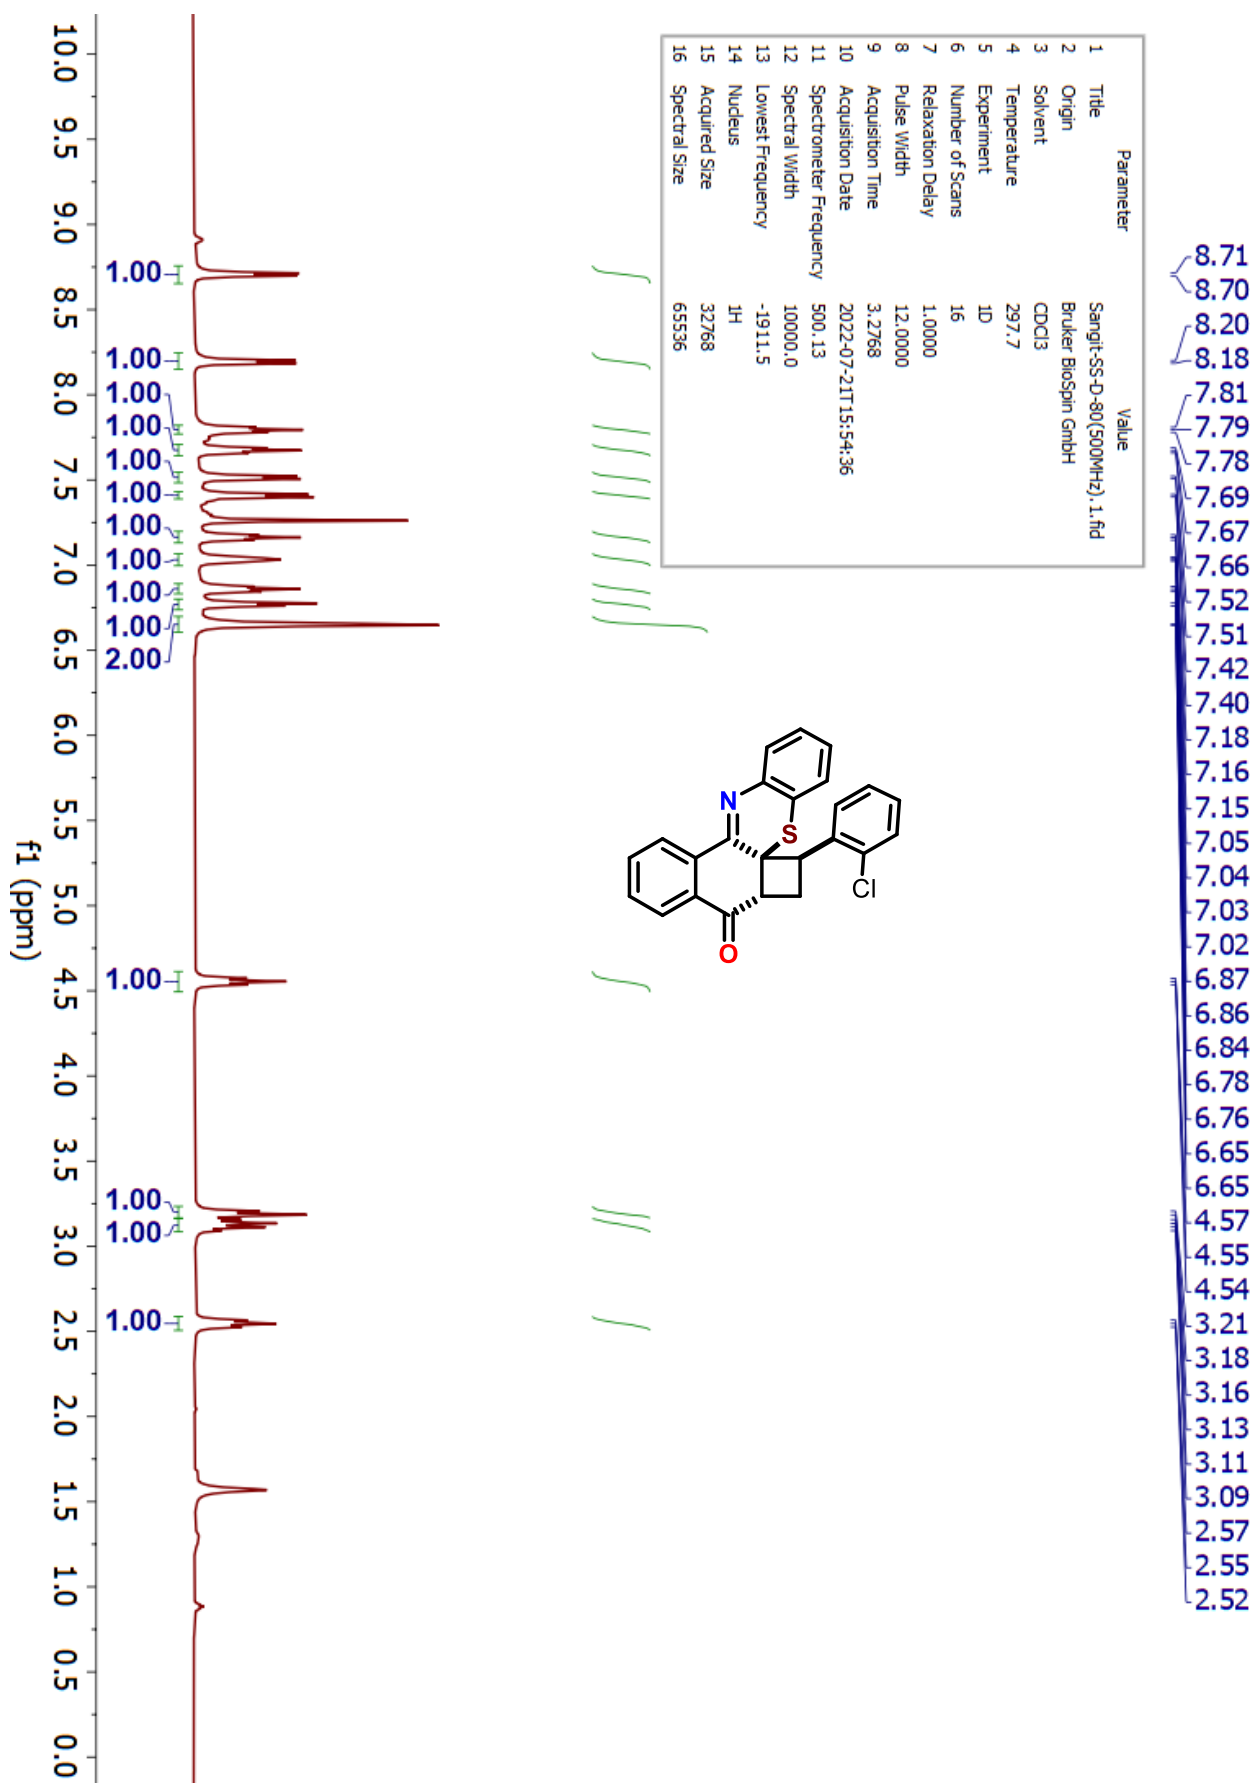

$^{13}\text{C}\{^1\text{H}\}$  NMR spectra of **2c**

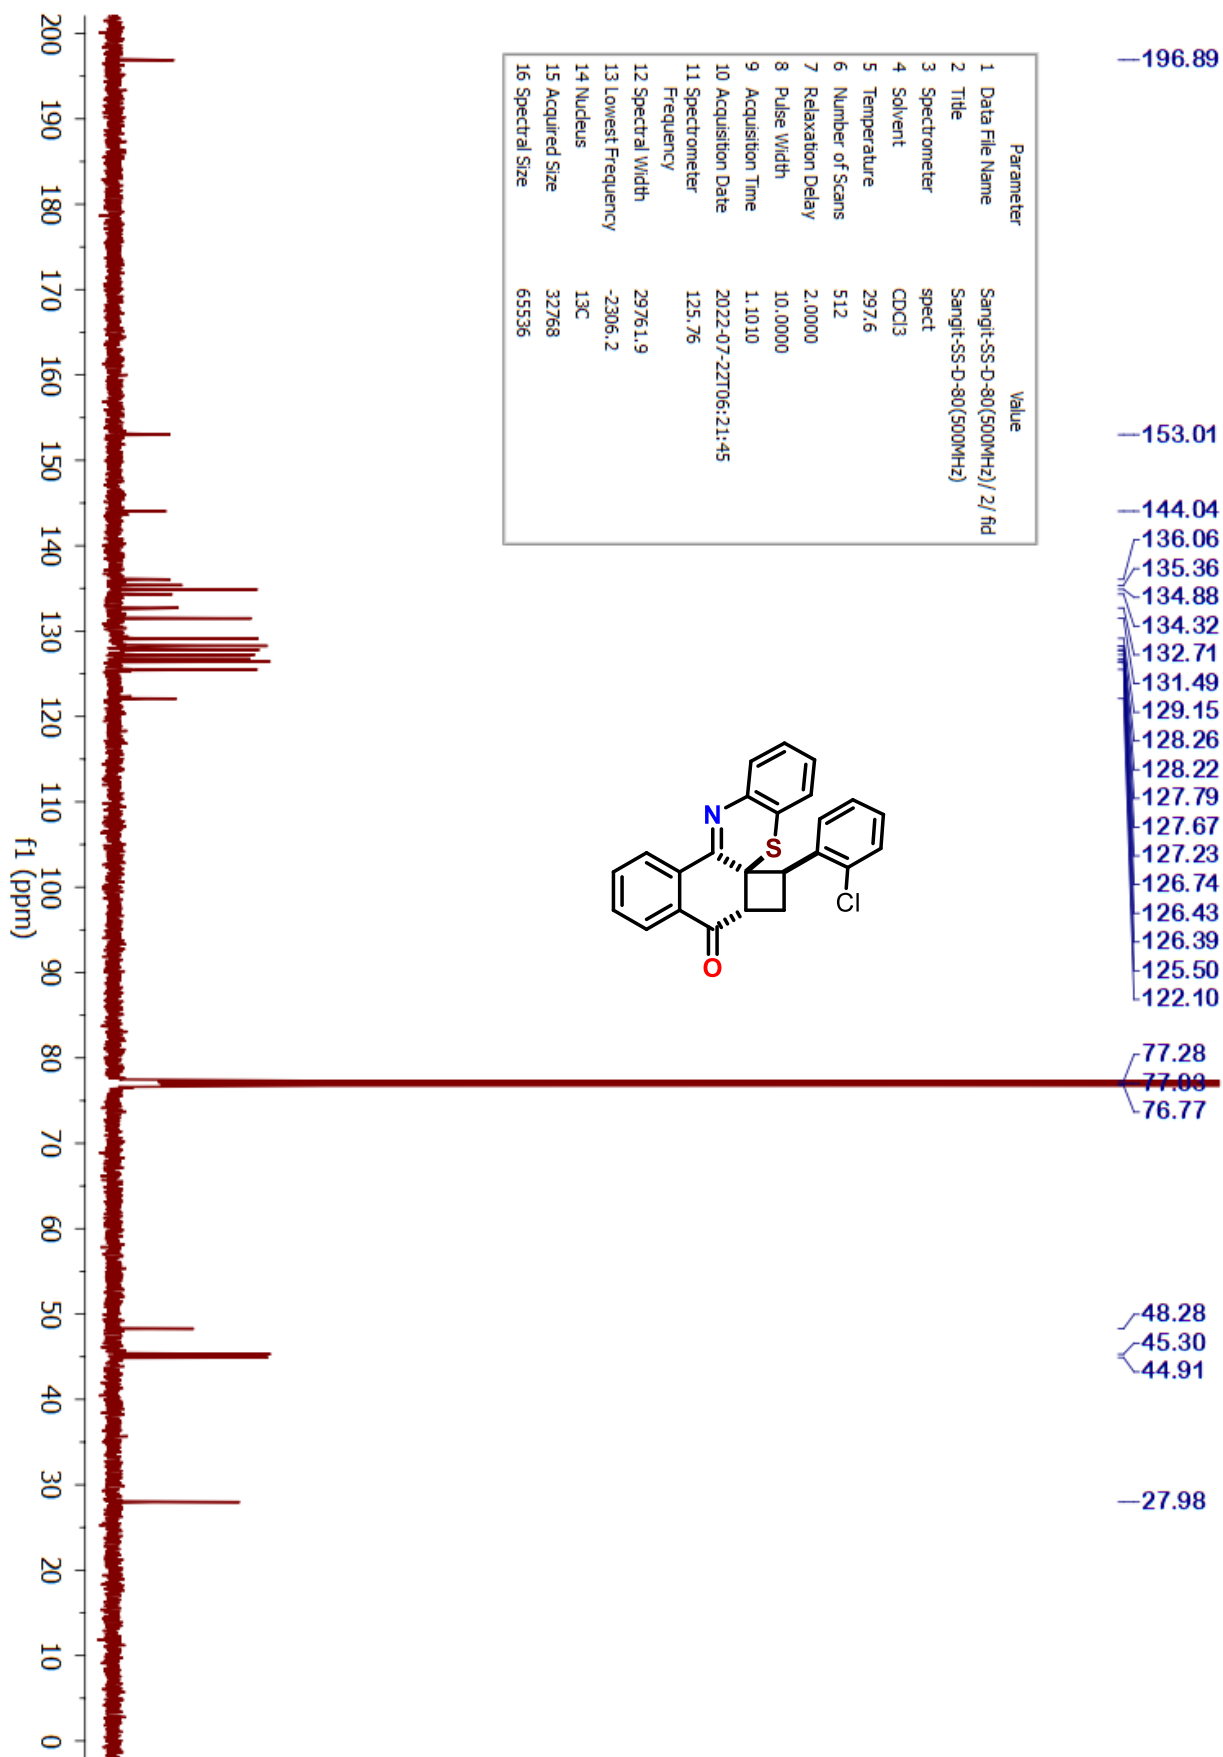

<sup>1</sup>H NMR spectra of **2d**

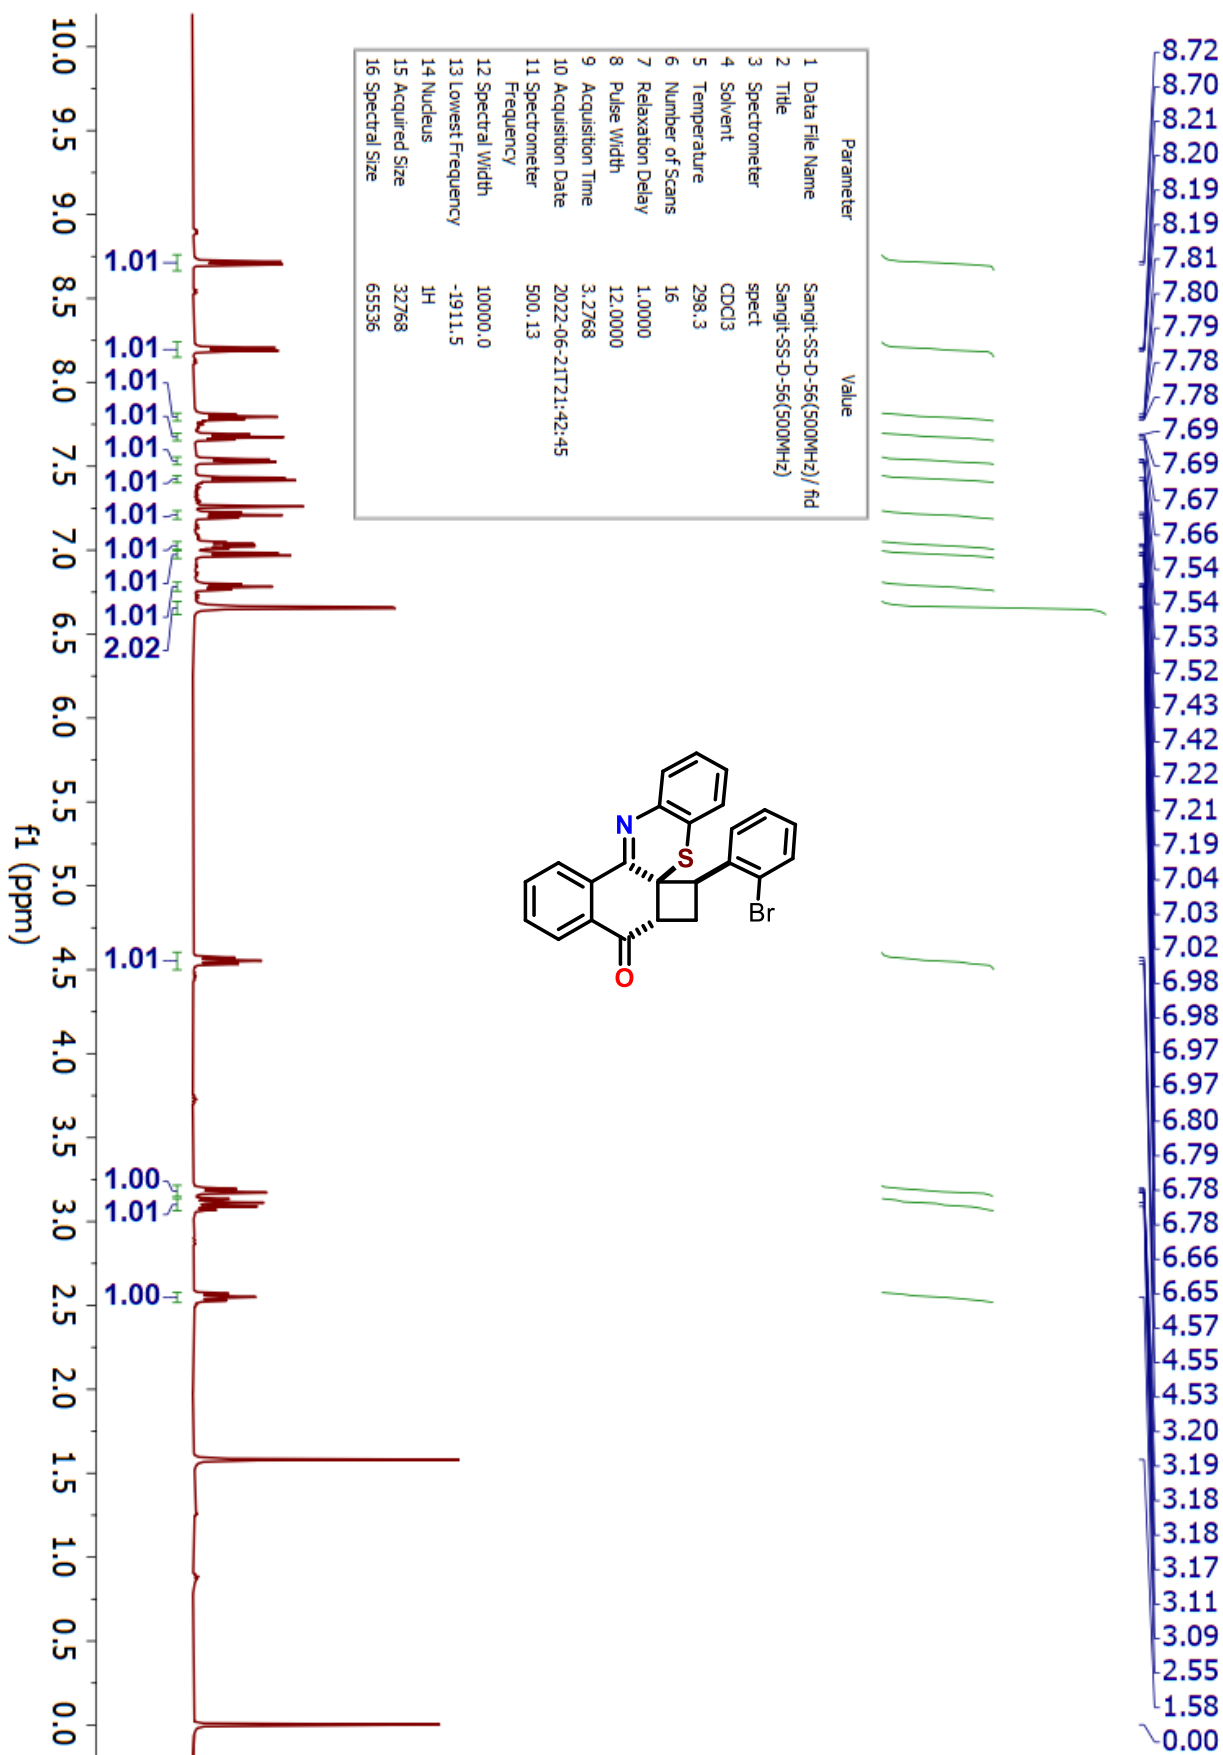

$^{13}\text{C}\{^1\text{H}\}$  NMR spectra of **2d**

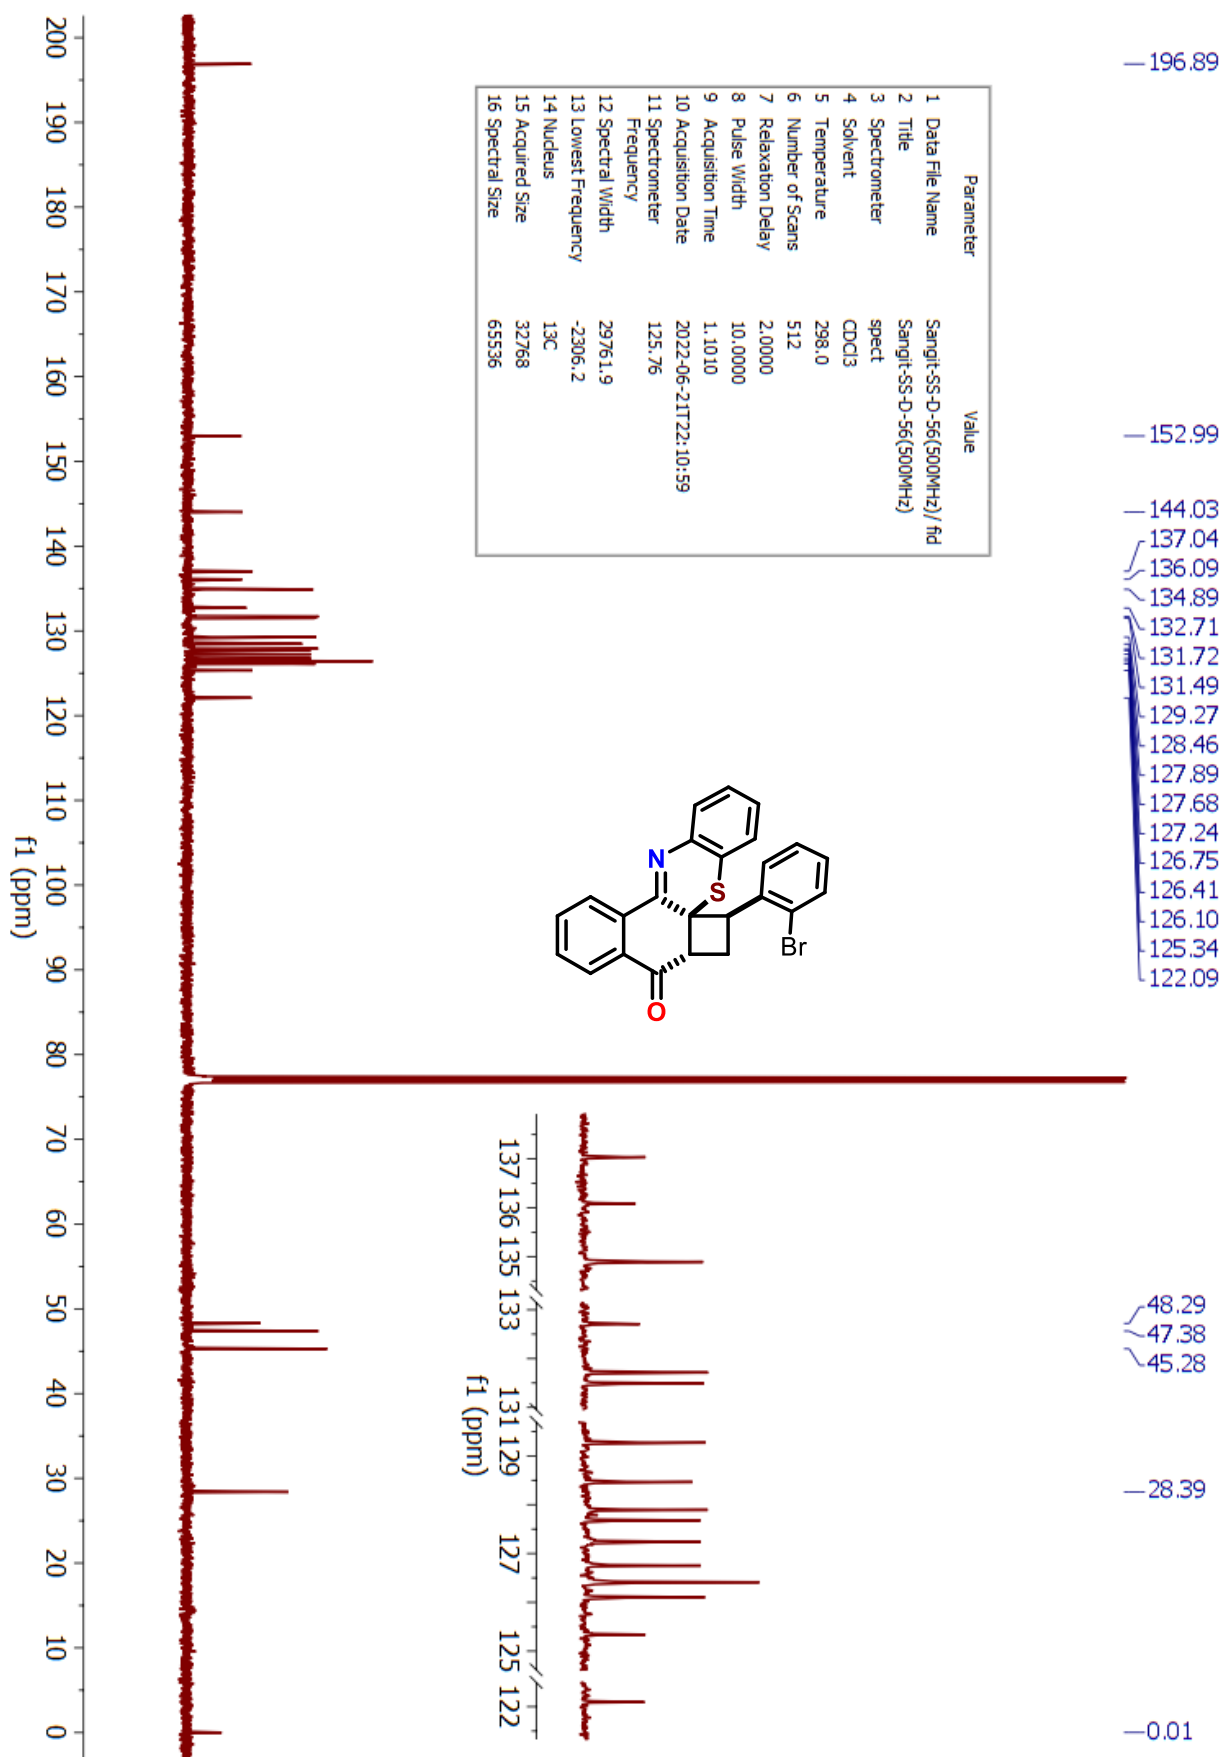

<sup>1</sup>H NMR spectra of **2e**

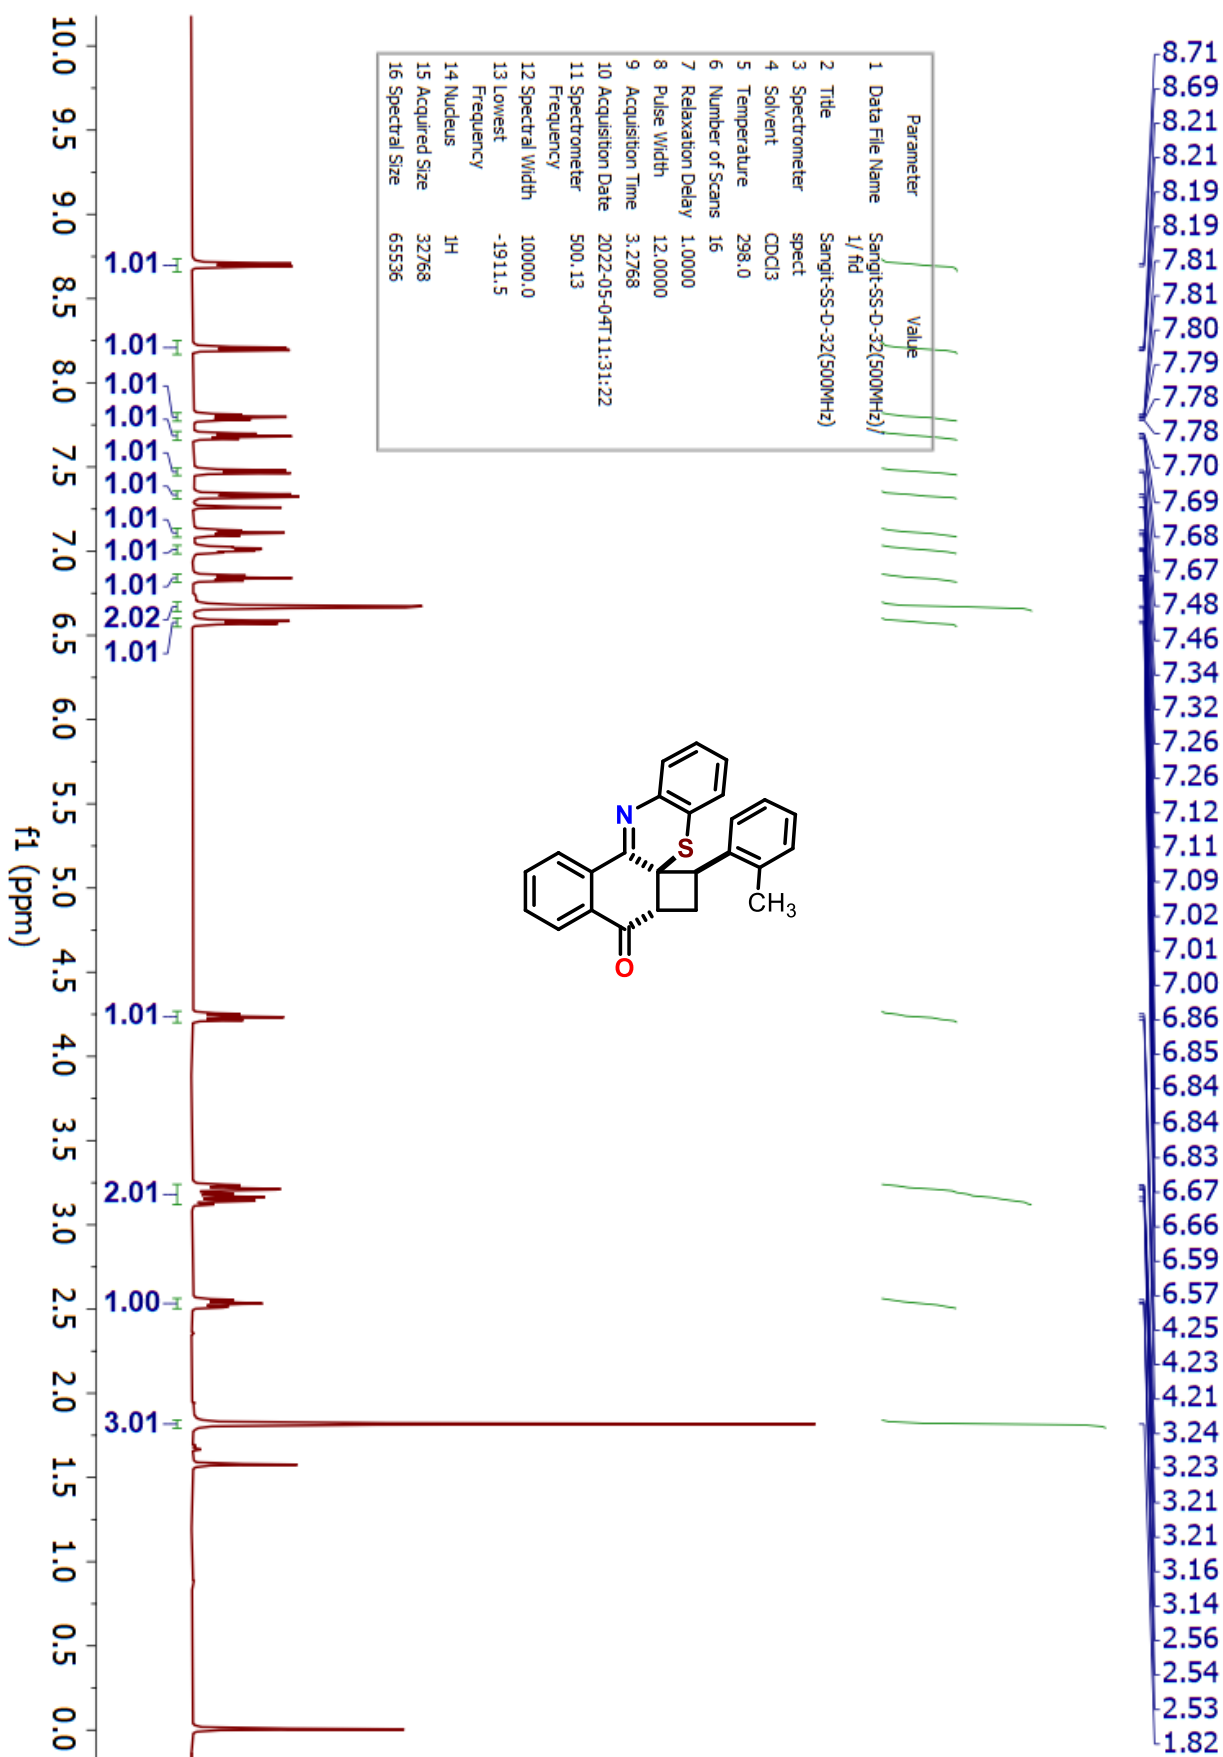

$^{13}\text{C}\{^1\text{H}\}$  NMR spectra of **2e**

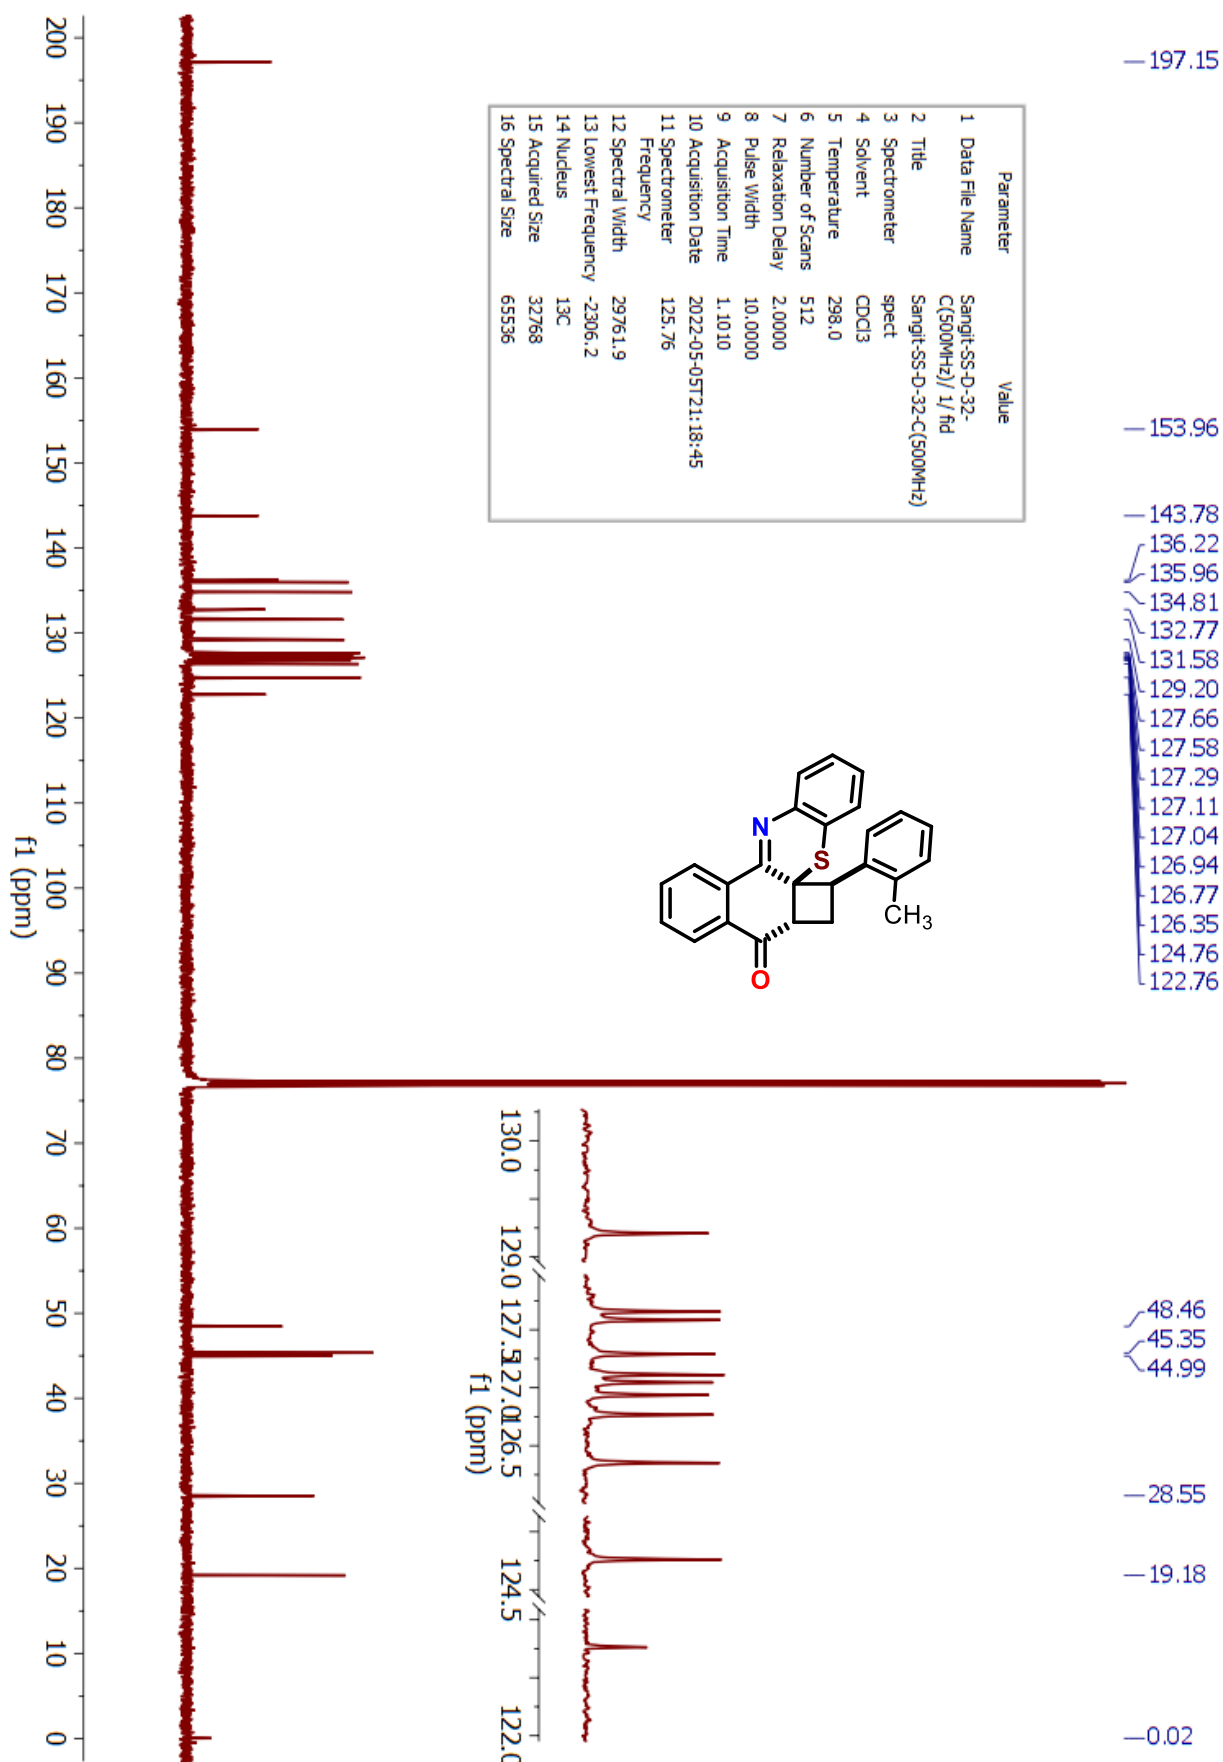



<sup>1</sup>H NMR spectra of **2f**

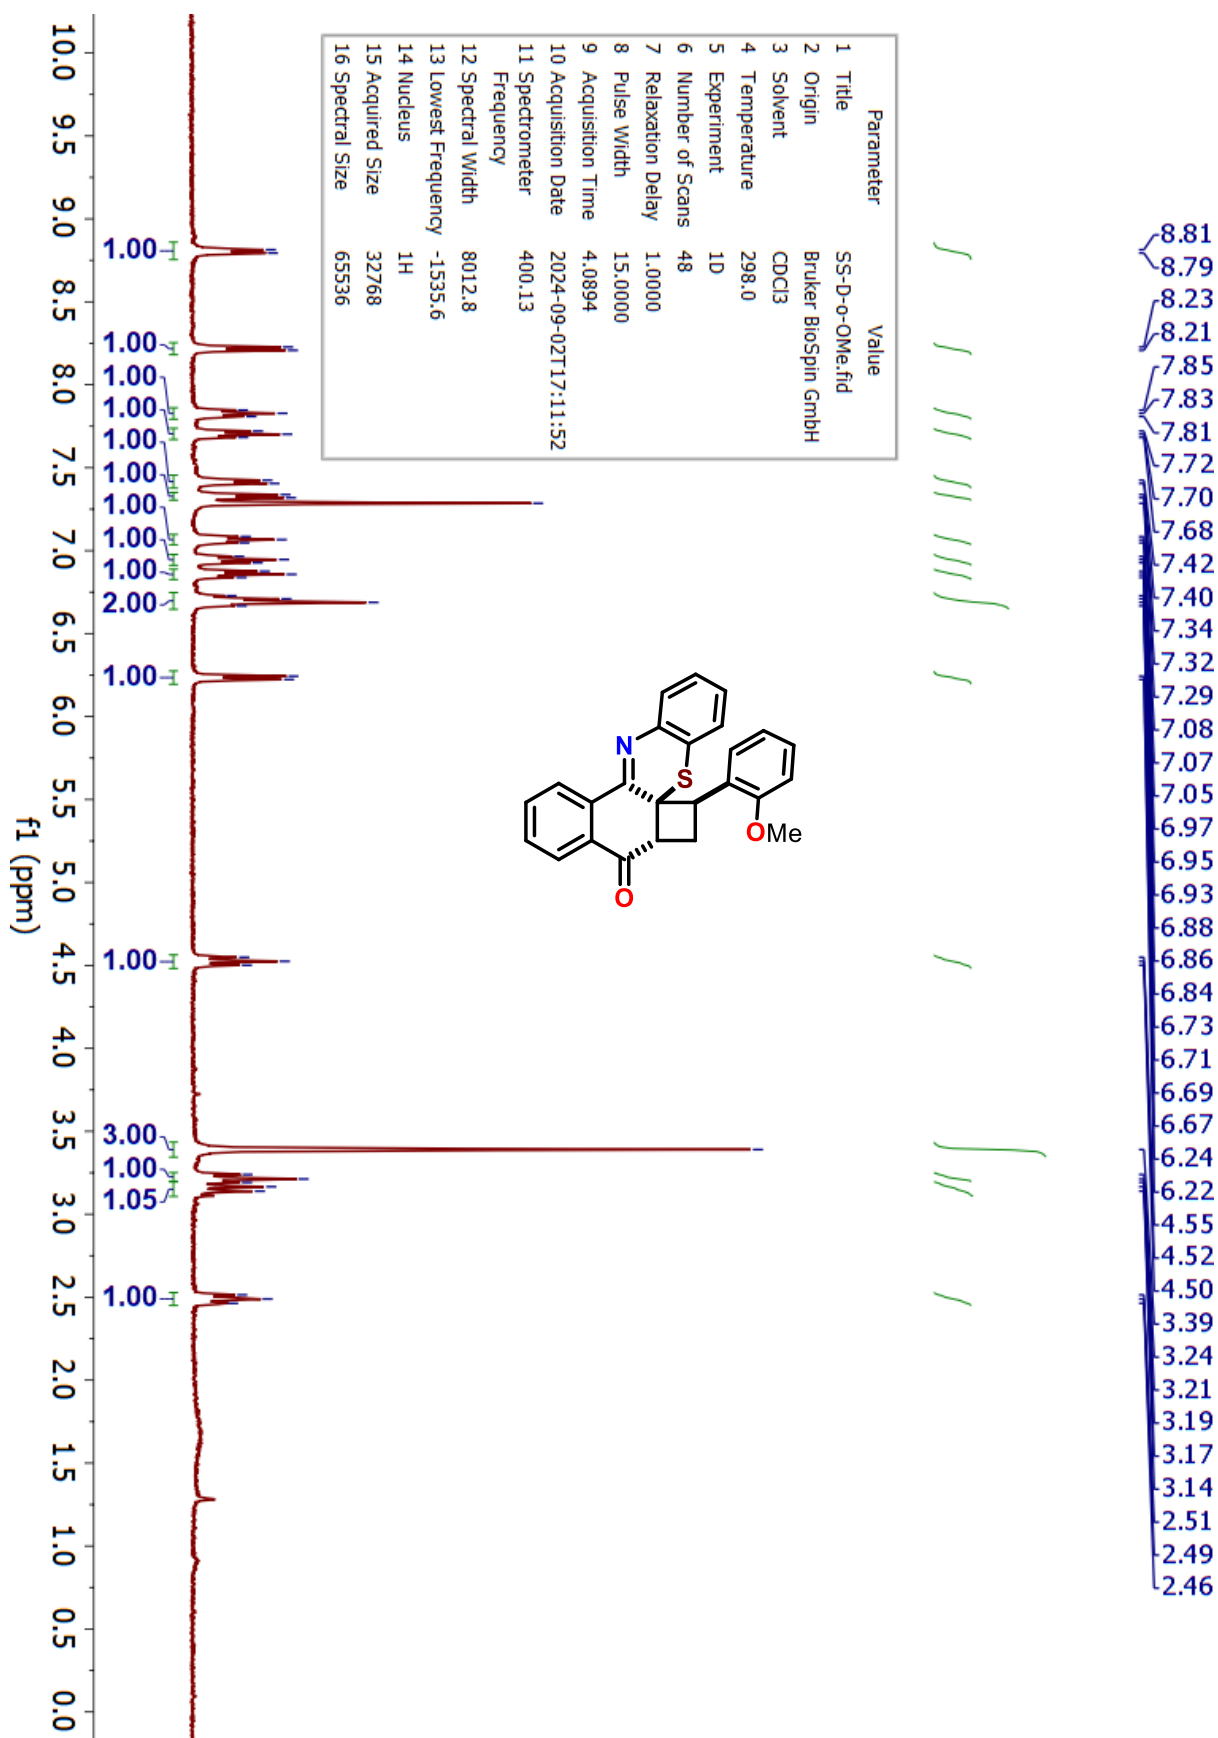

$^{13}\text{C}\{^1\text{H}\}$  NMR spectra of **2f**

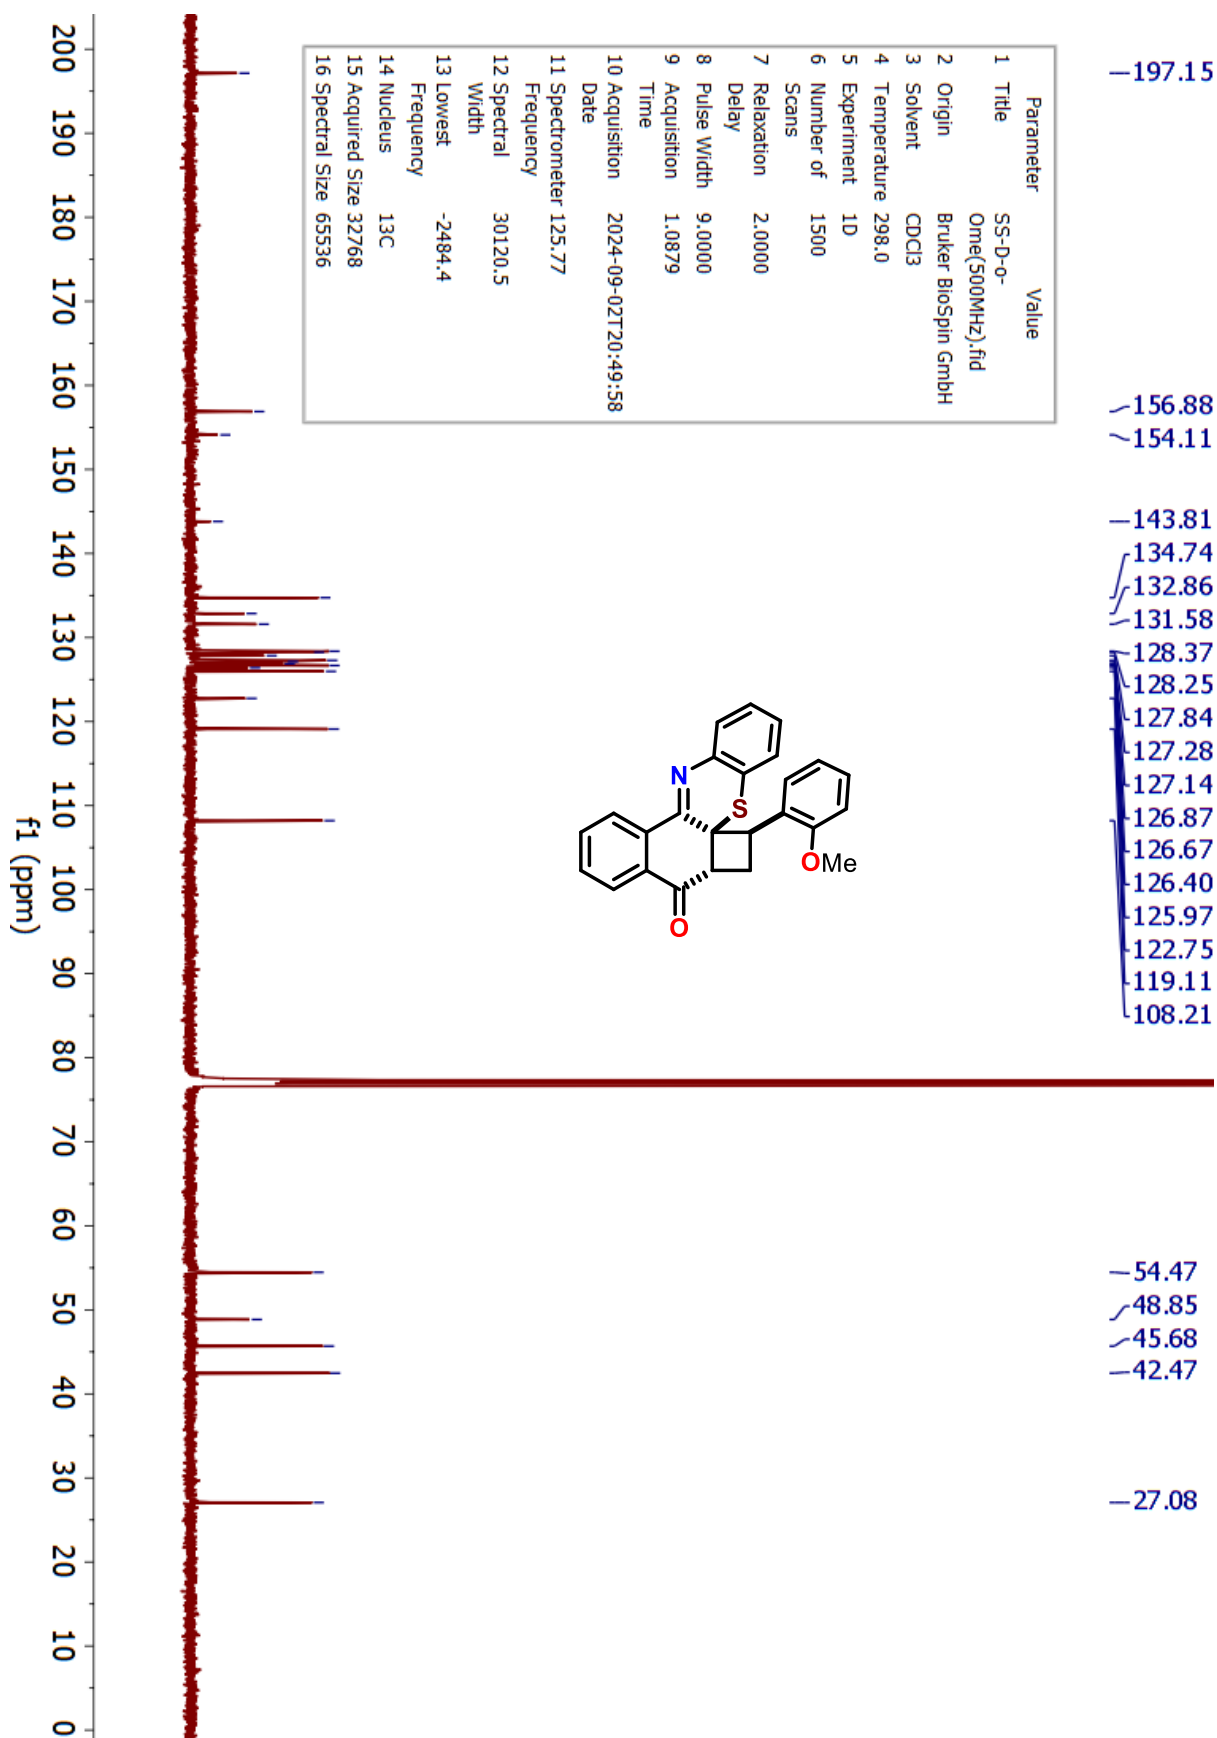

<sup>1</sup>H NMR spectra of **2g**

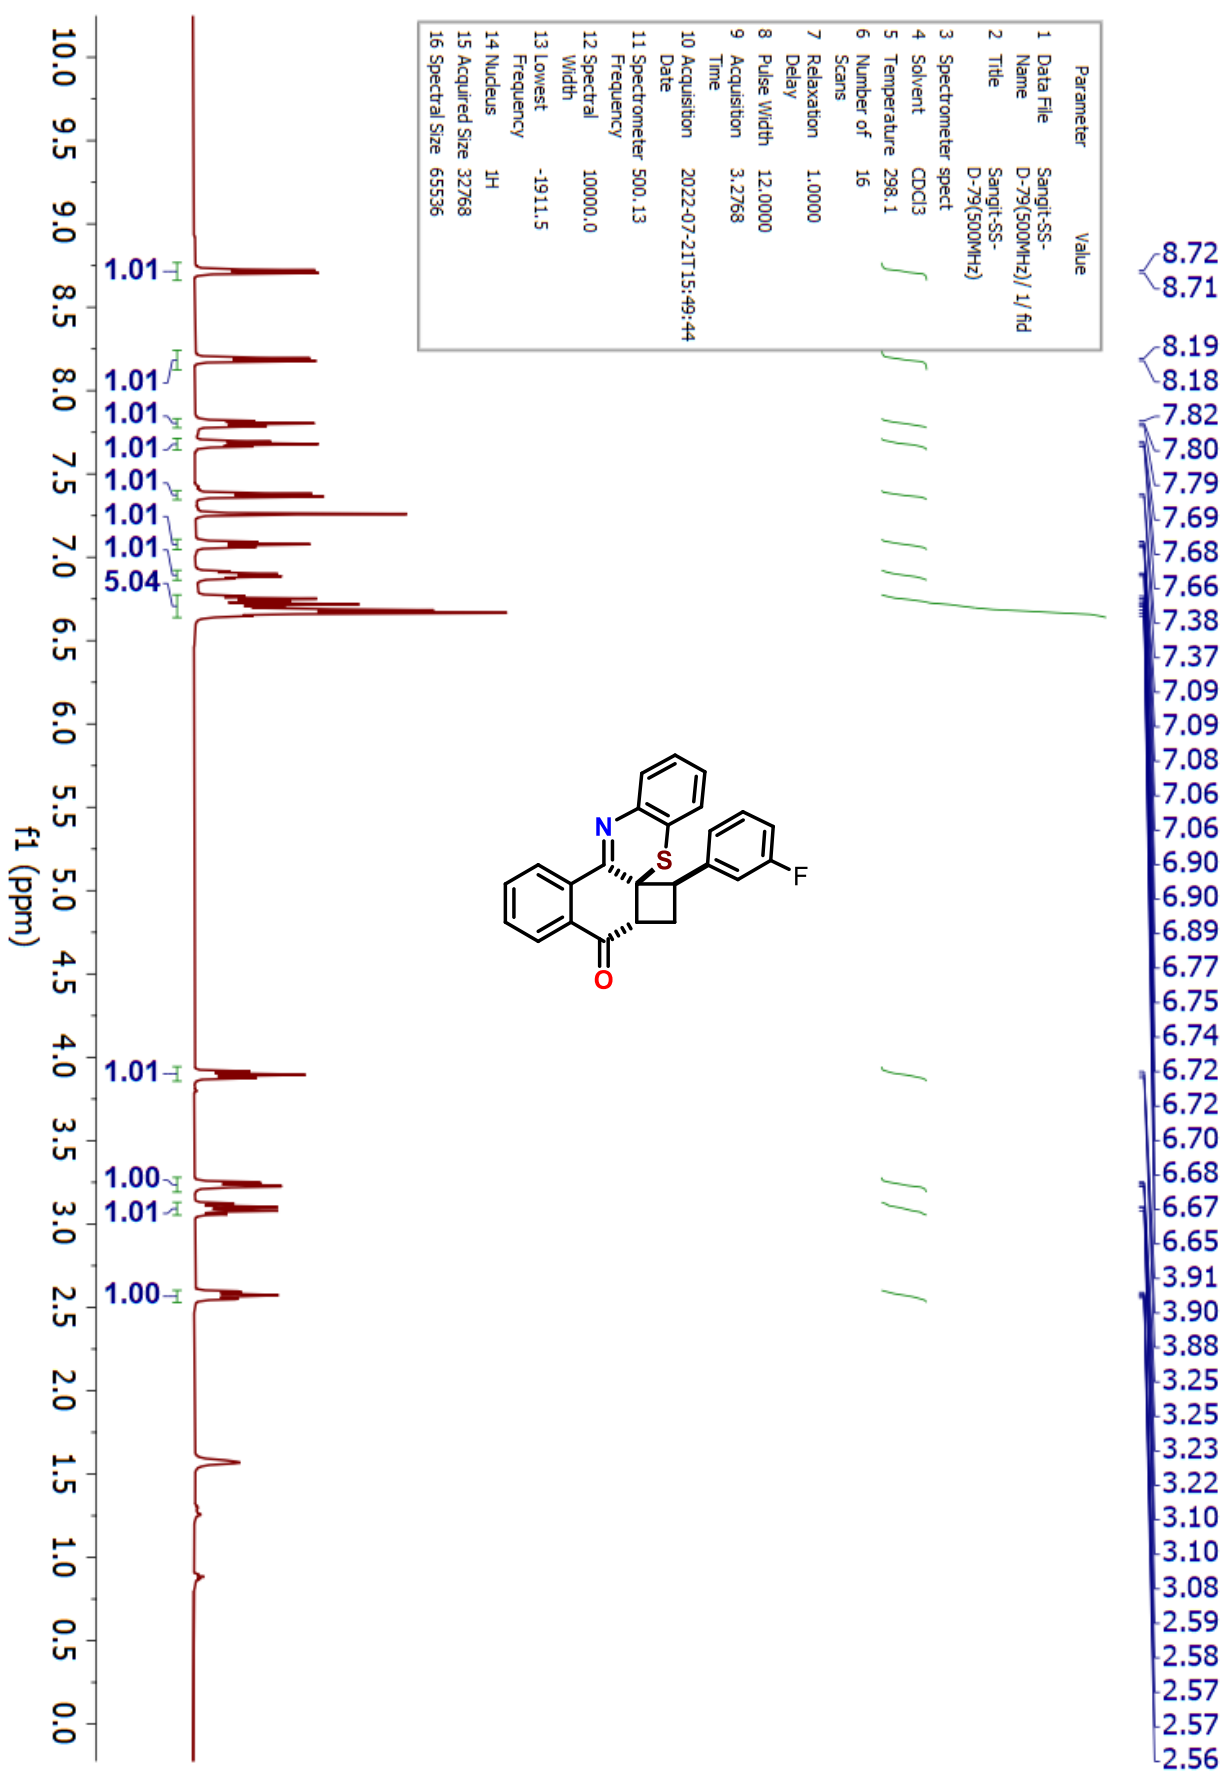

$^{13}\text{C}\{^1\text{H}\}$  NMR spectra of **2g**

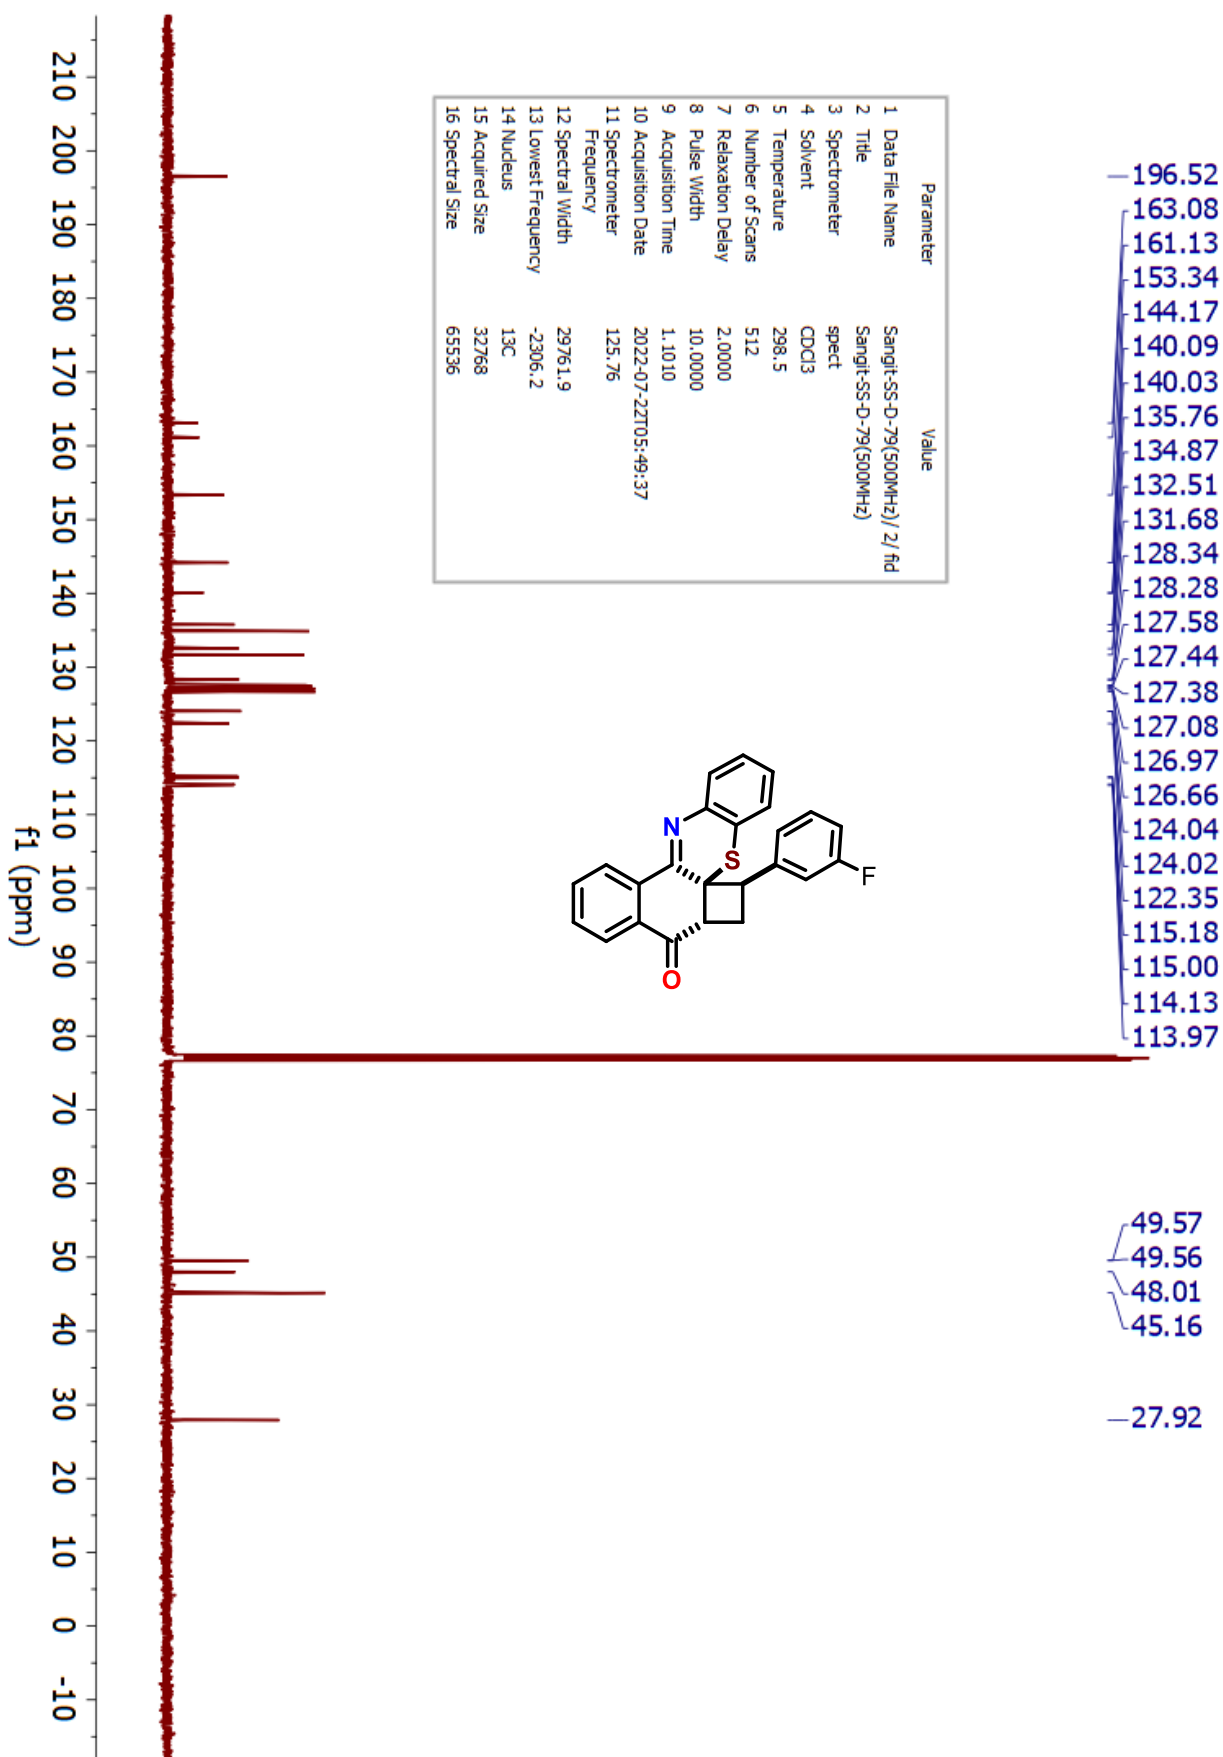

<sup>1</sup>H NMR spectra of **2h**

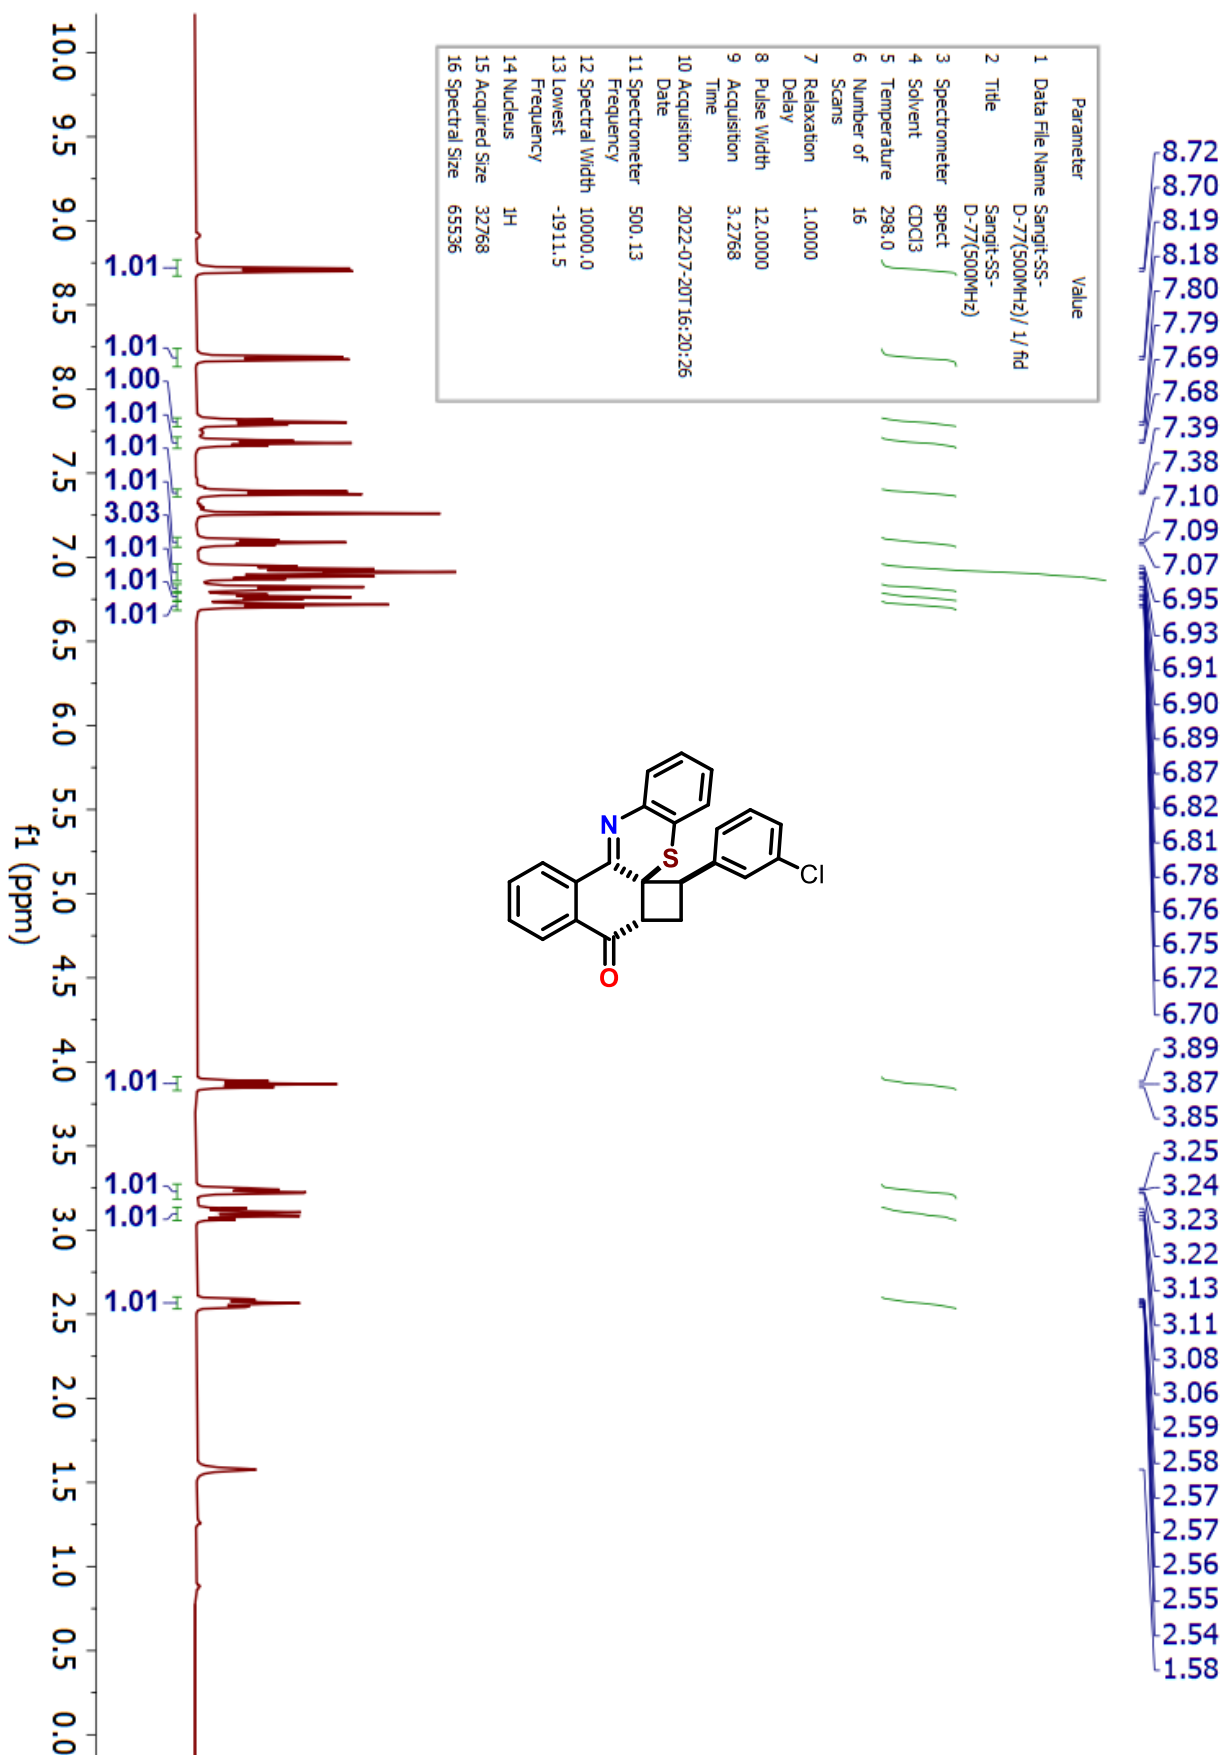

$^{13}\text{C}\{^1\text{H}\}$  NMR spectra of **2h**

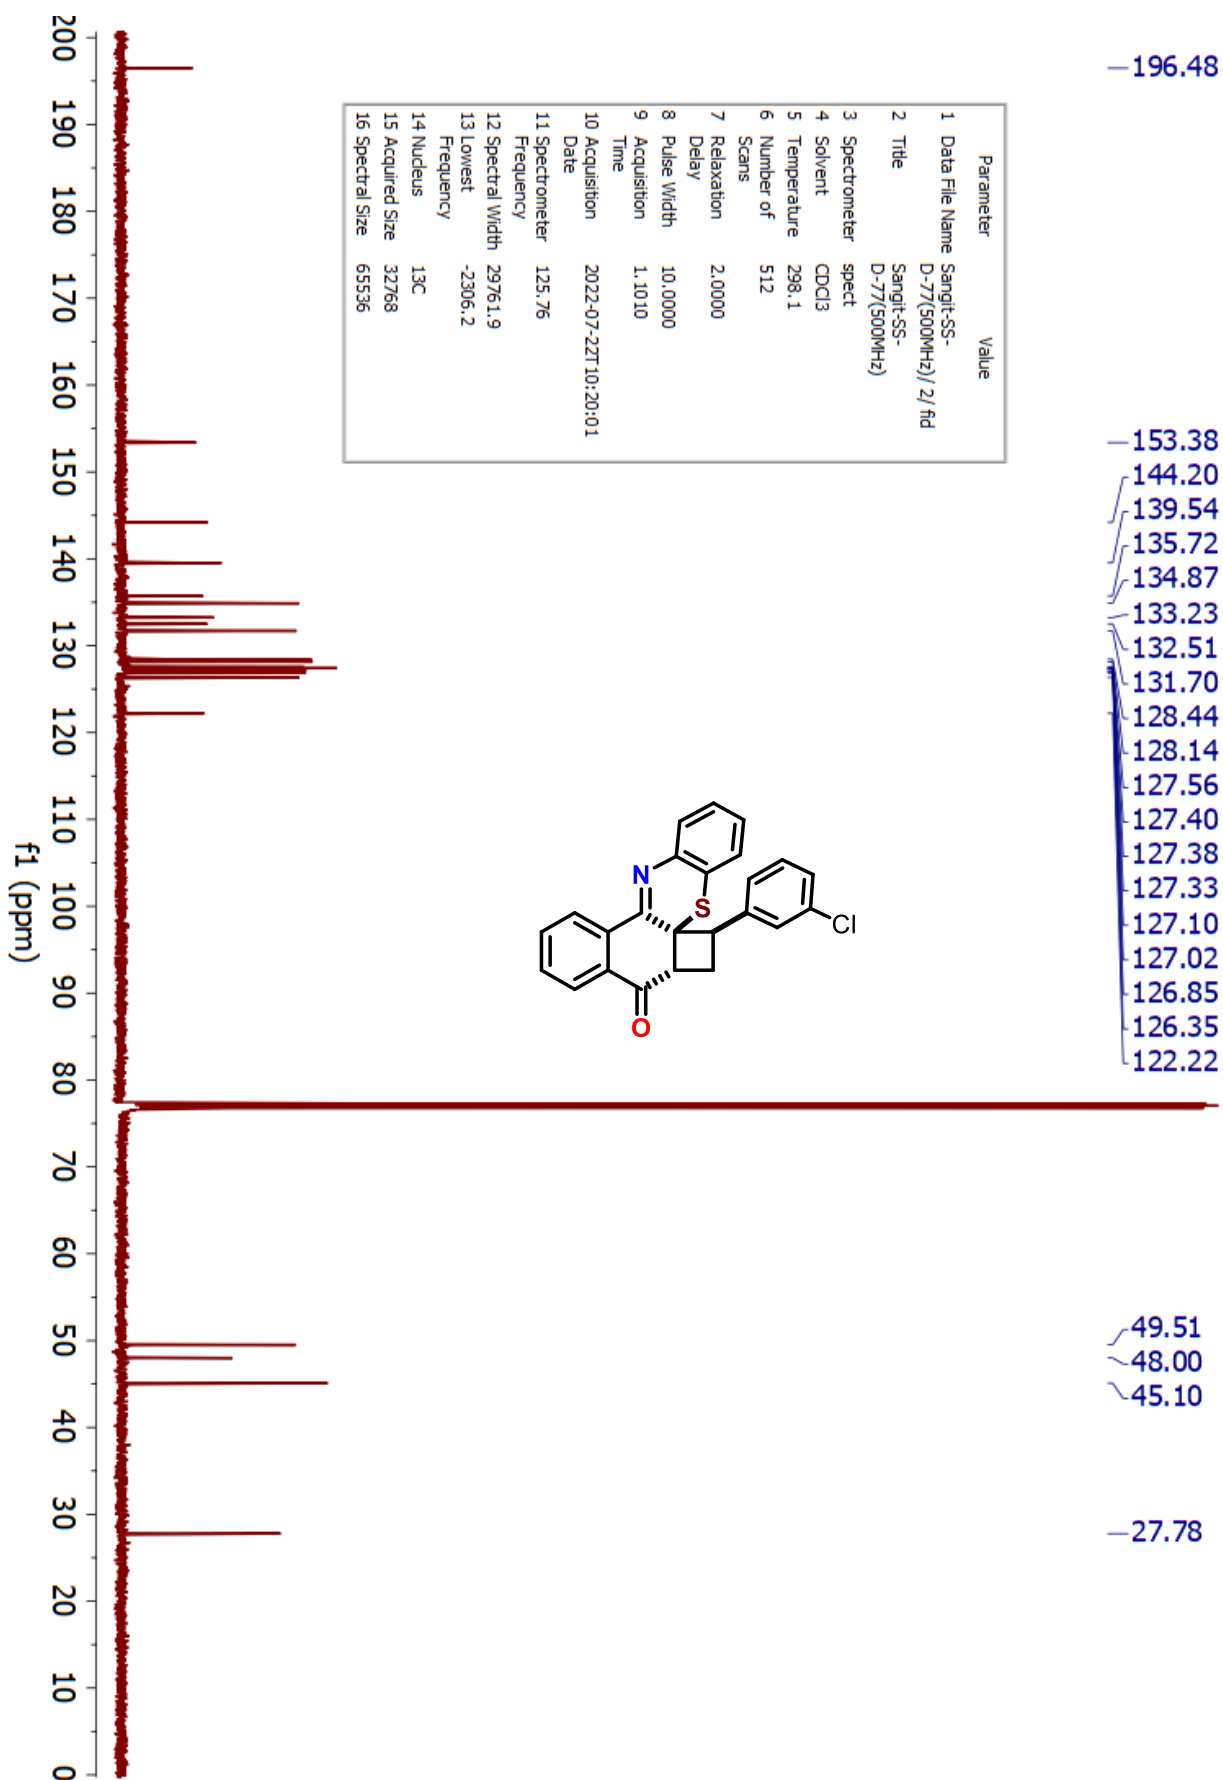

<sup>1</sup>H NMR spectra of **2i**

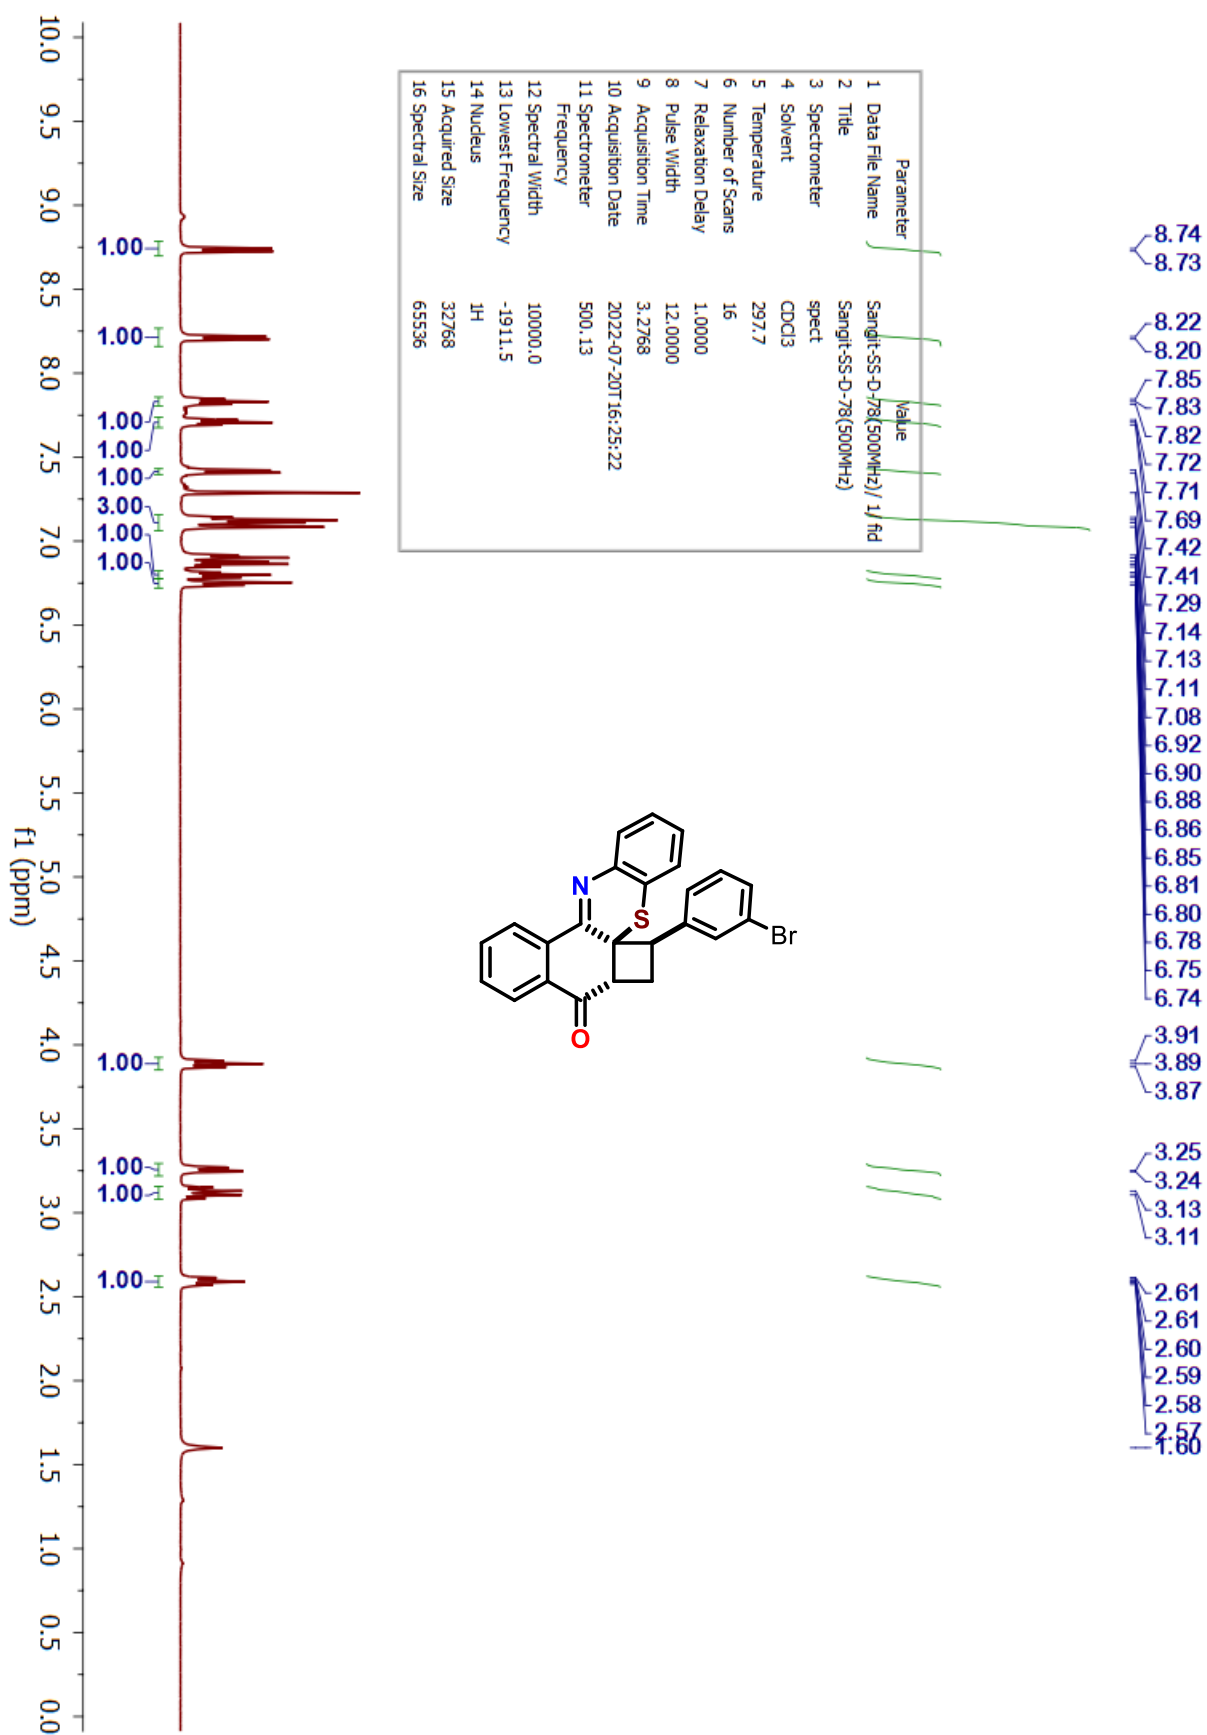

$^{13}\text{C}\{^1\text{H}\}$  NMR spectra of **2i**

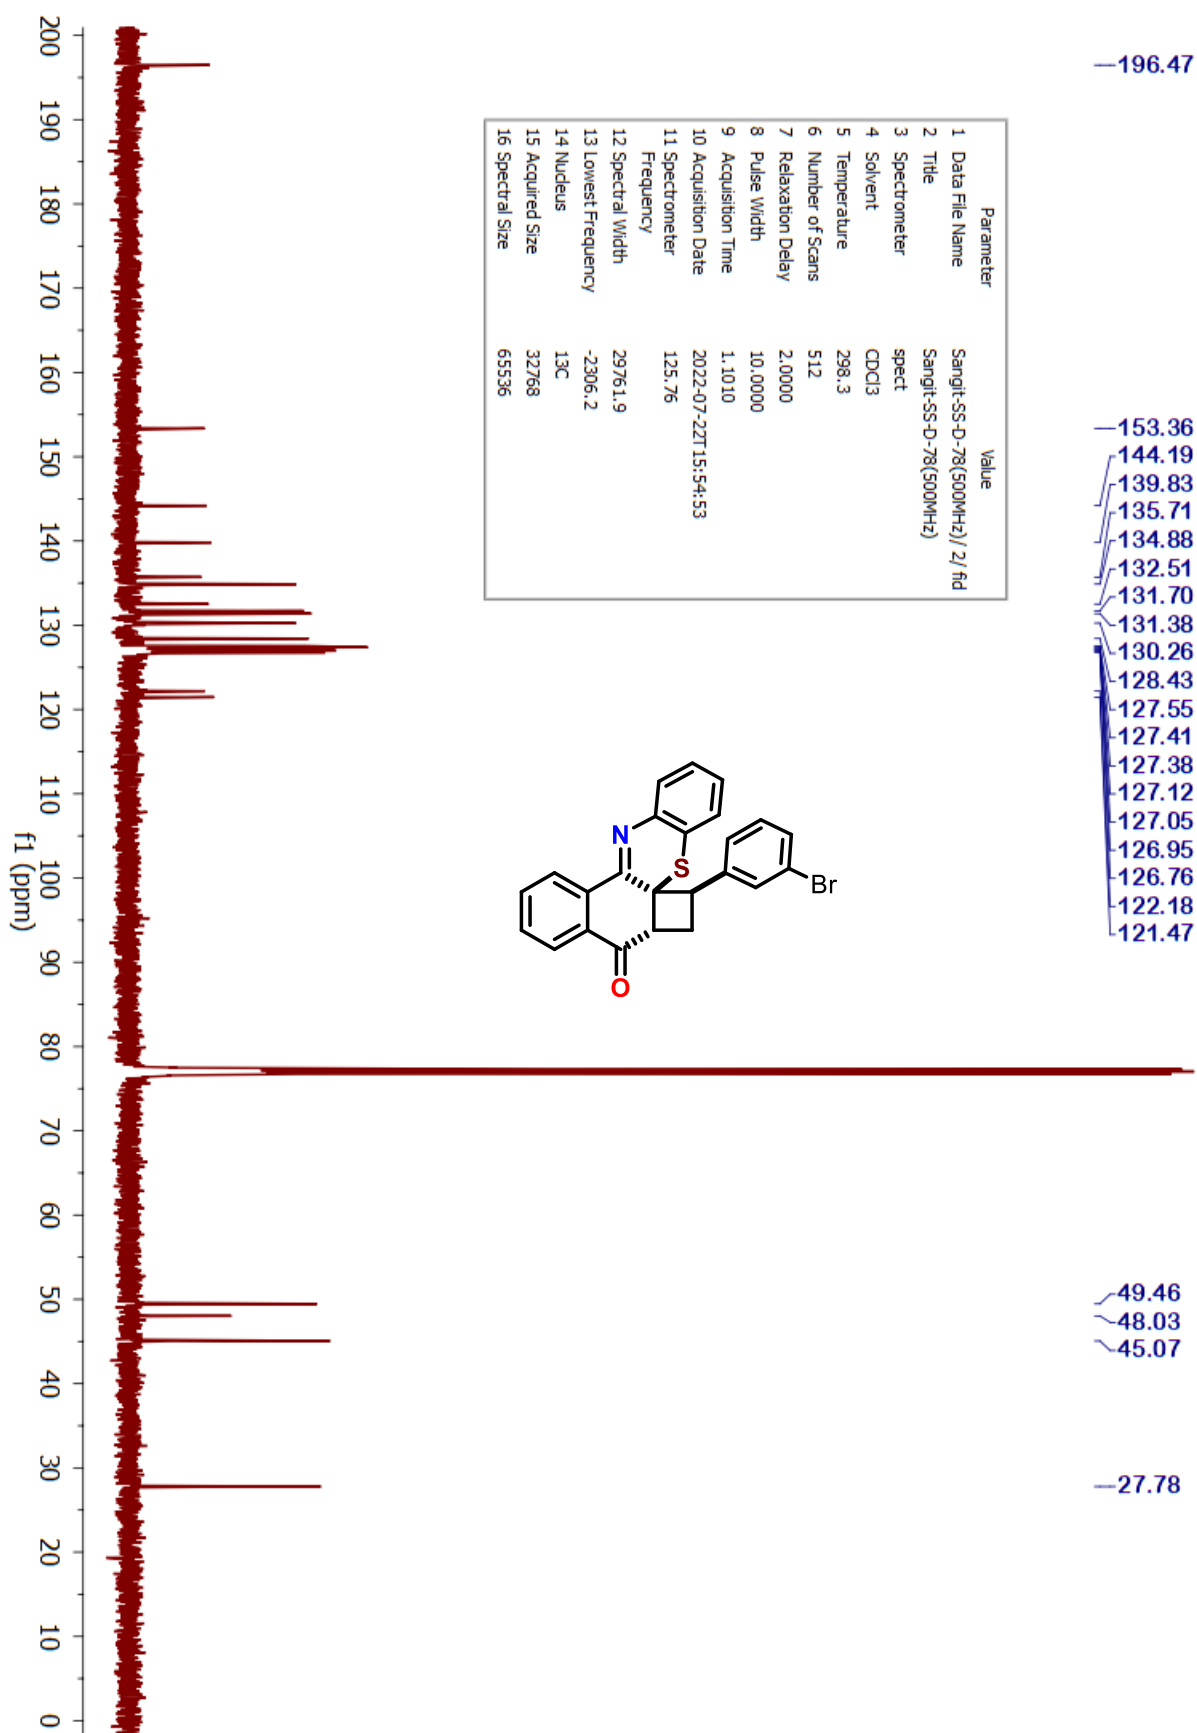



<sup>1</sup>H NMR spectra of **2j**

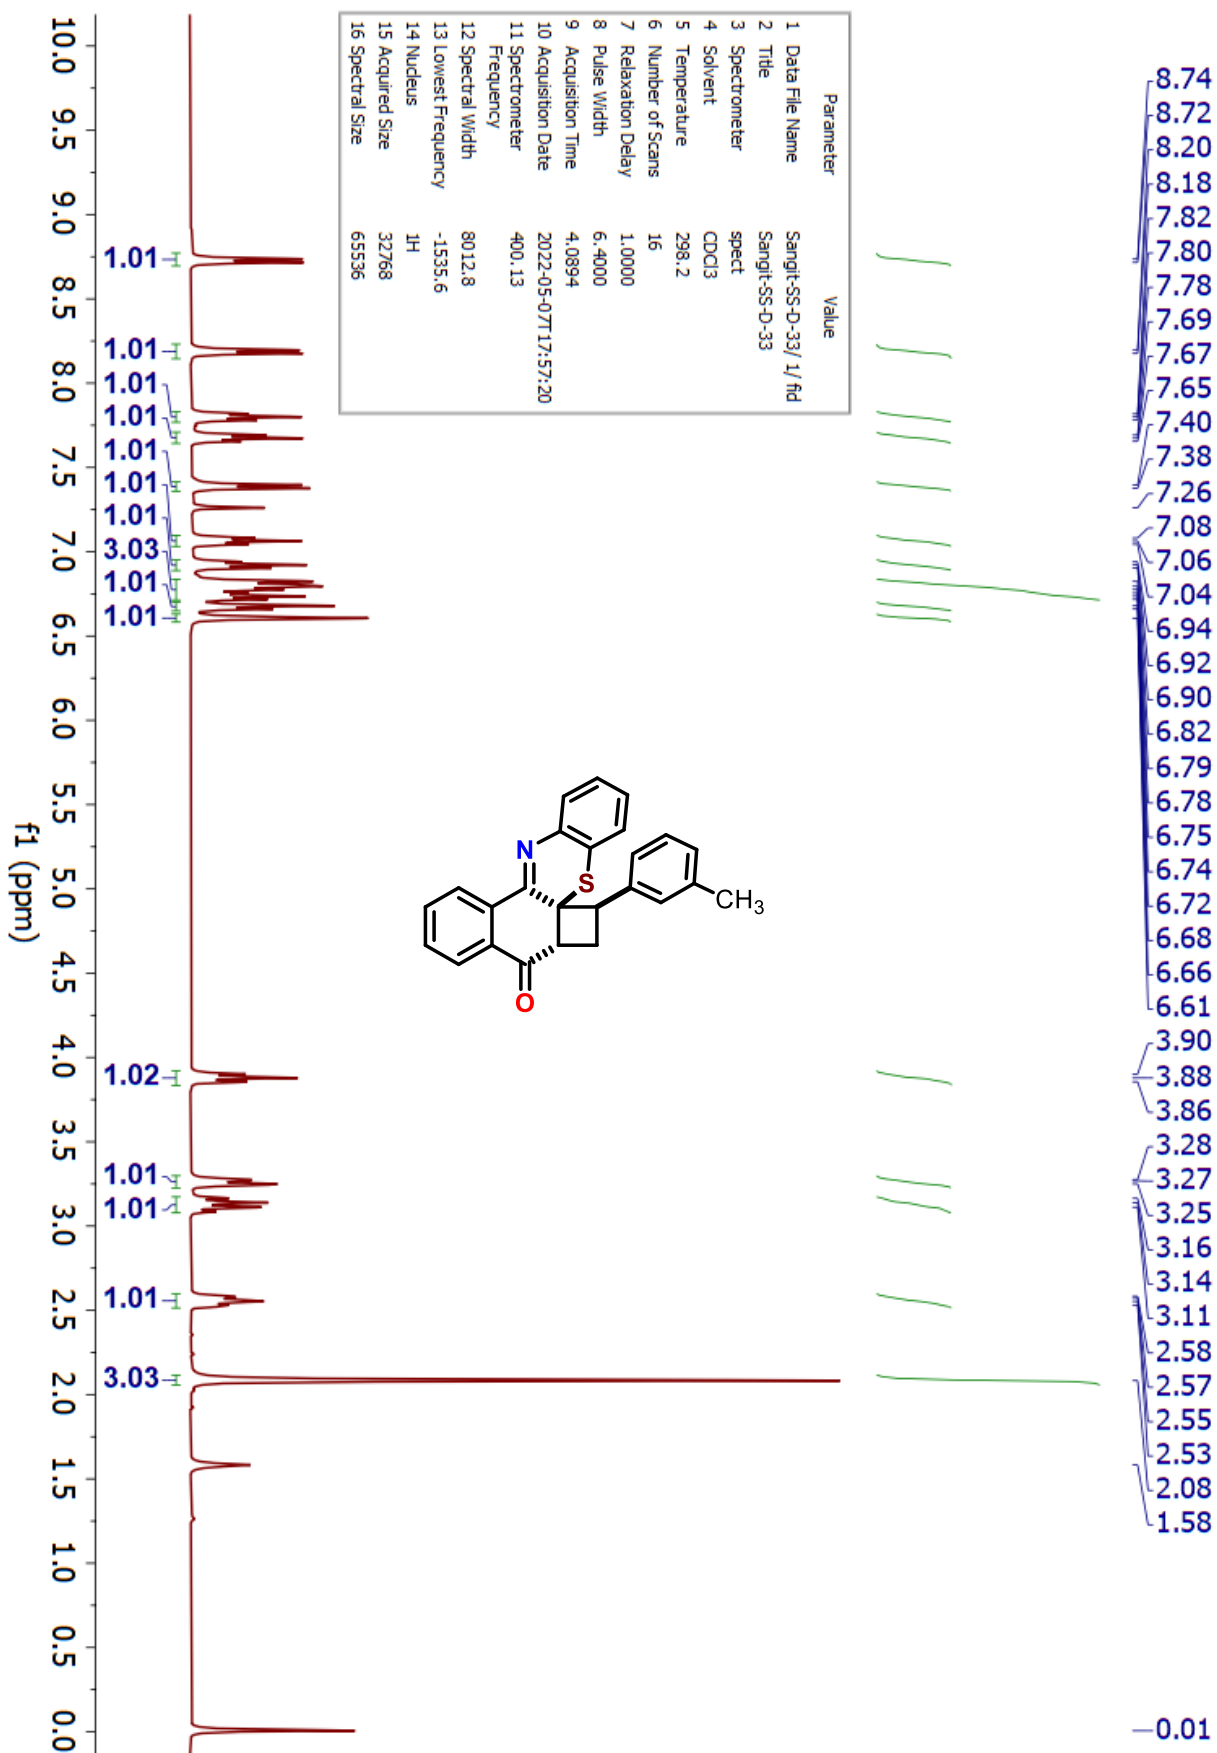

$^{13}\text{C}\{^1\text{H}\}$  NMR spectra of **2j**

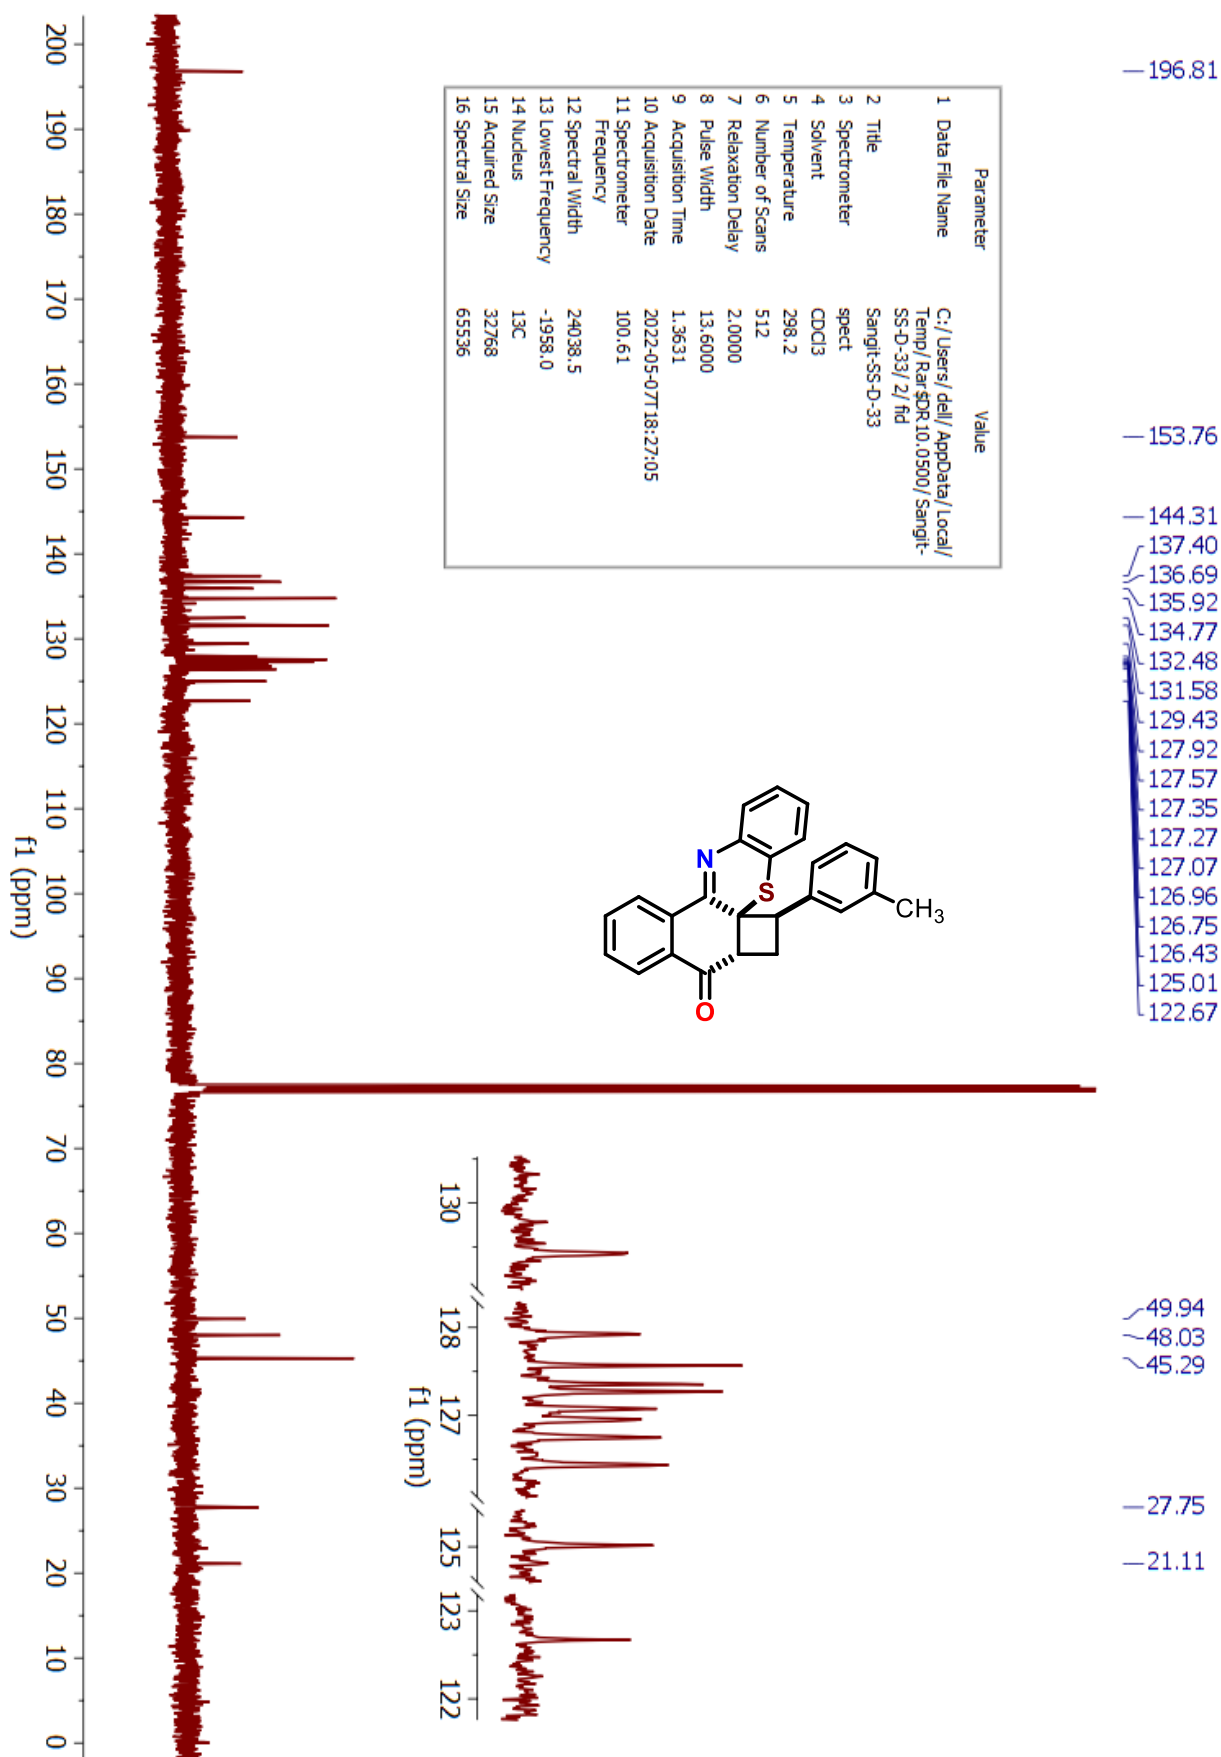

<sup>1</sup>H NMR spectra of **2k**

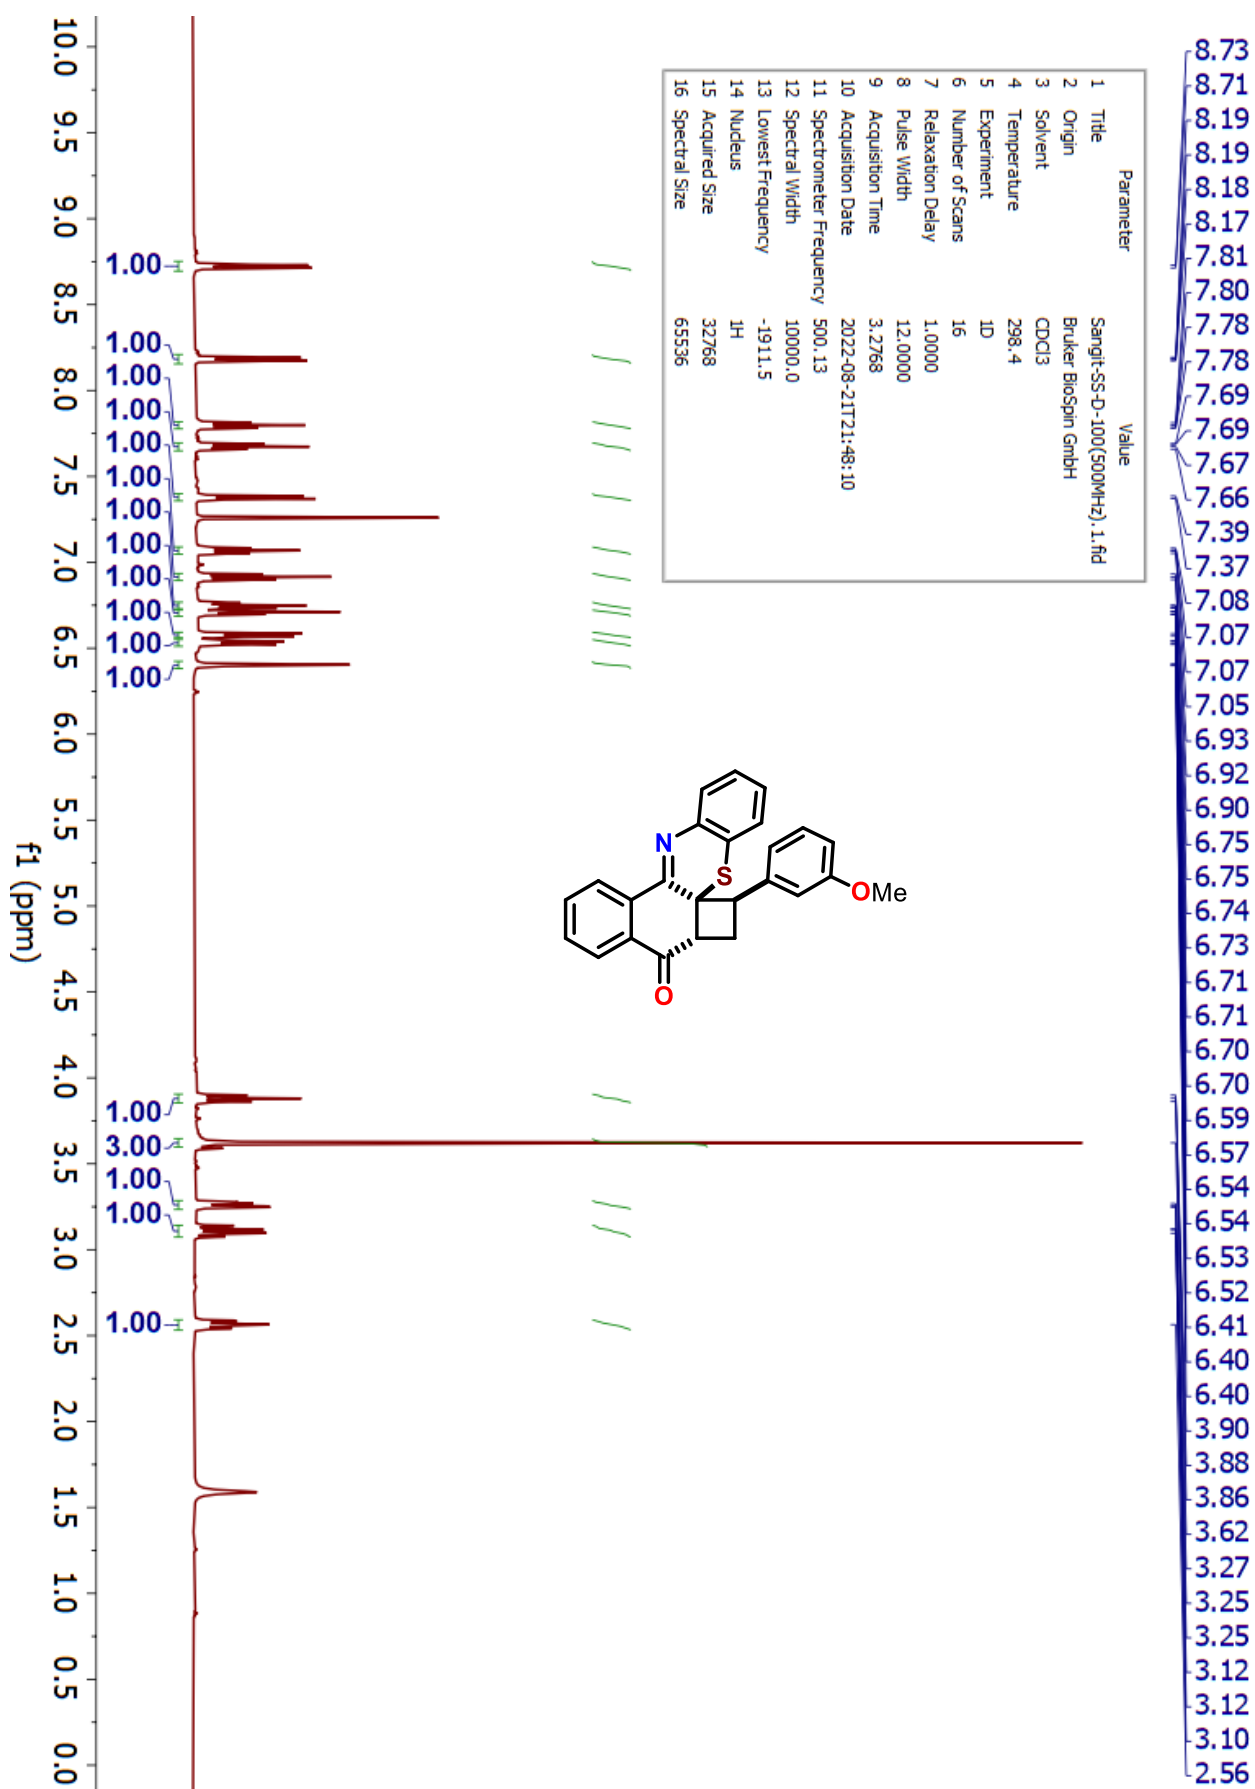

$^{13}\text{C}\{^1\text{H}\}$  NMR spectra of **2k**

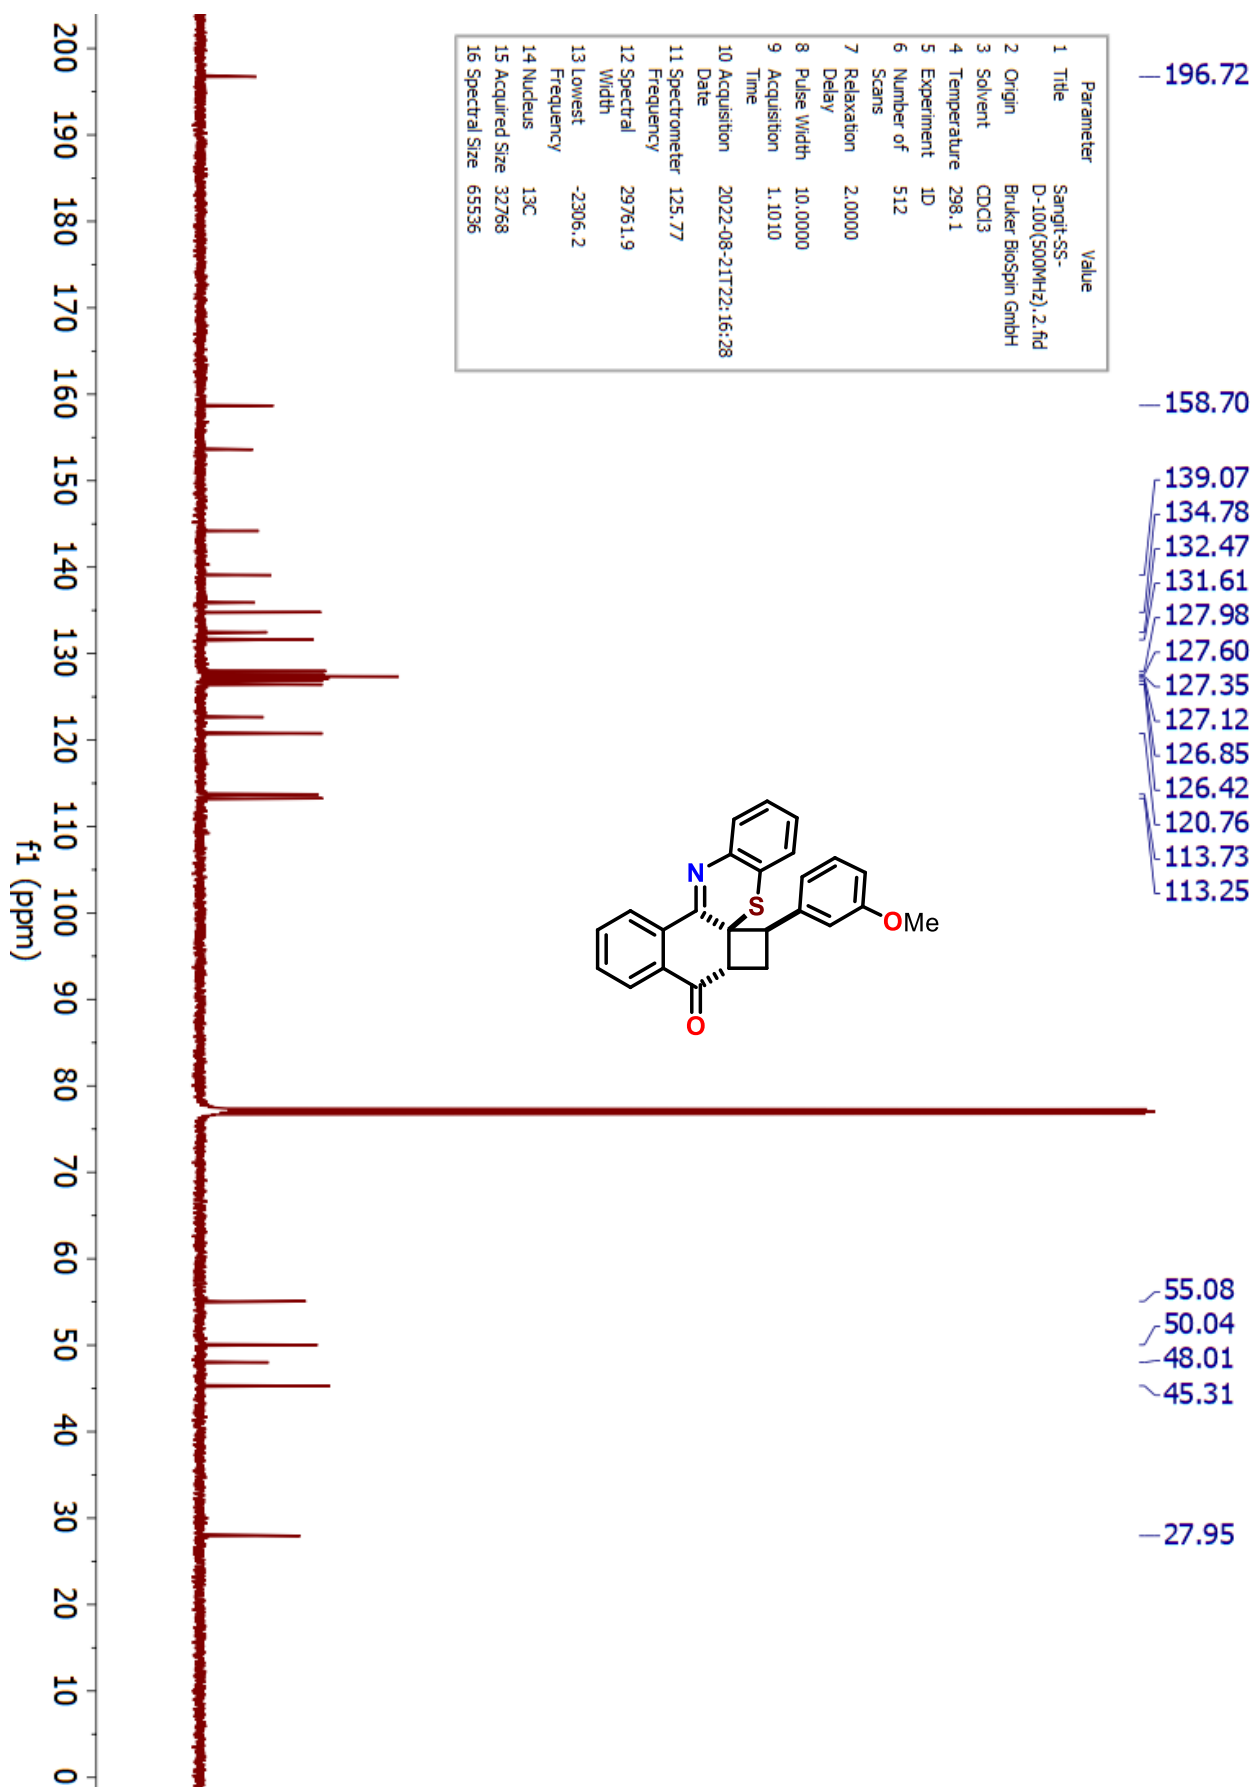

<sup>1</sup>H NMR spectra of **2l**

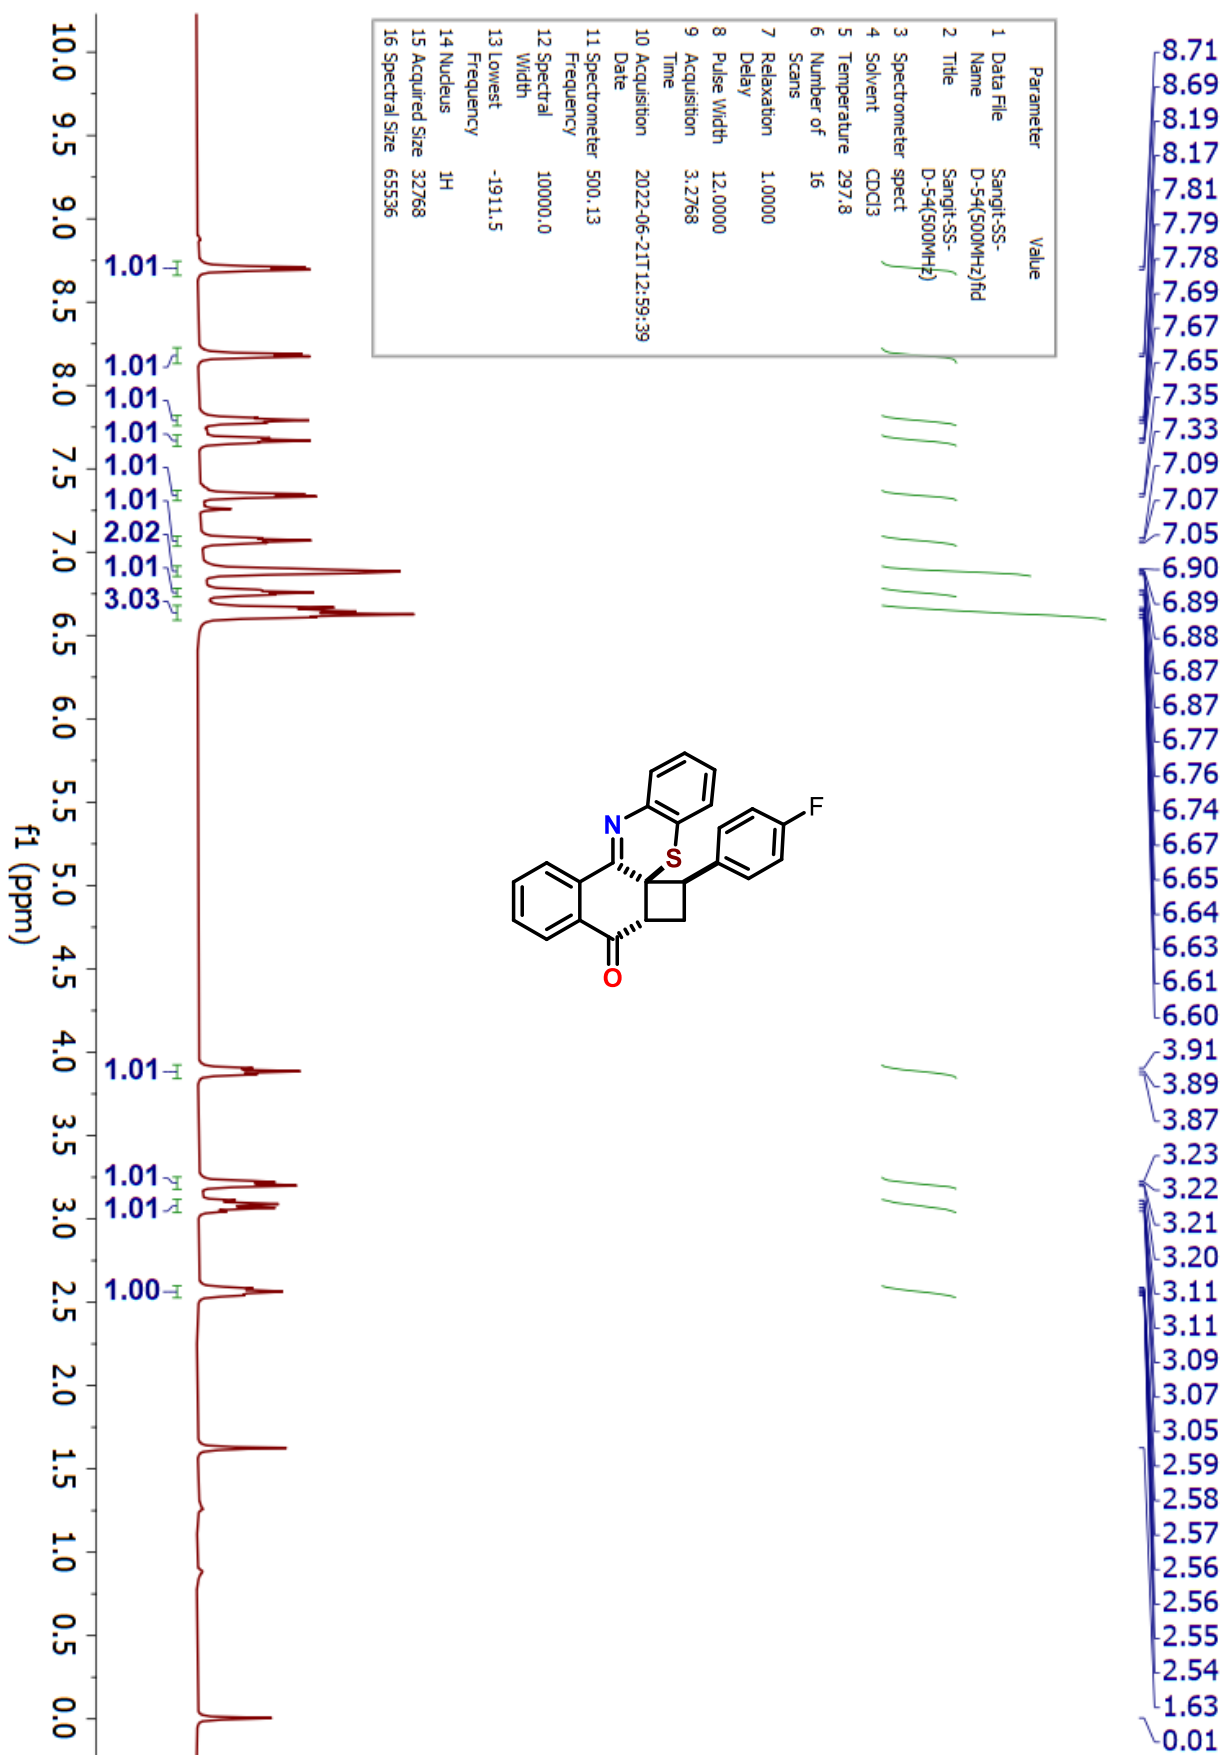

$^{13}\text{C}\{^1\text{H}\}$  NMR spectra of **21**

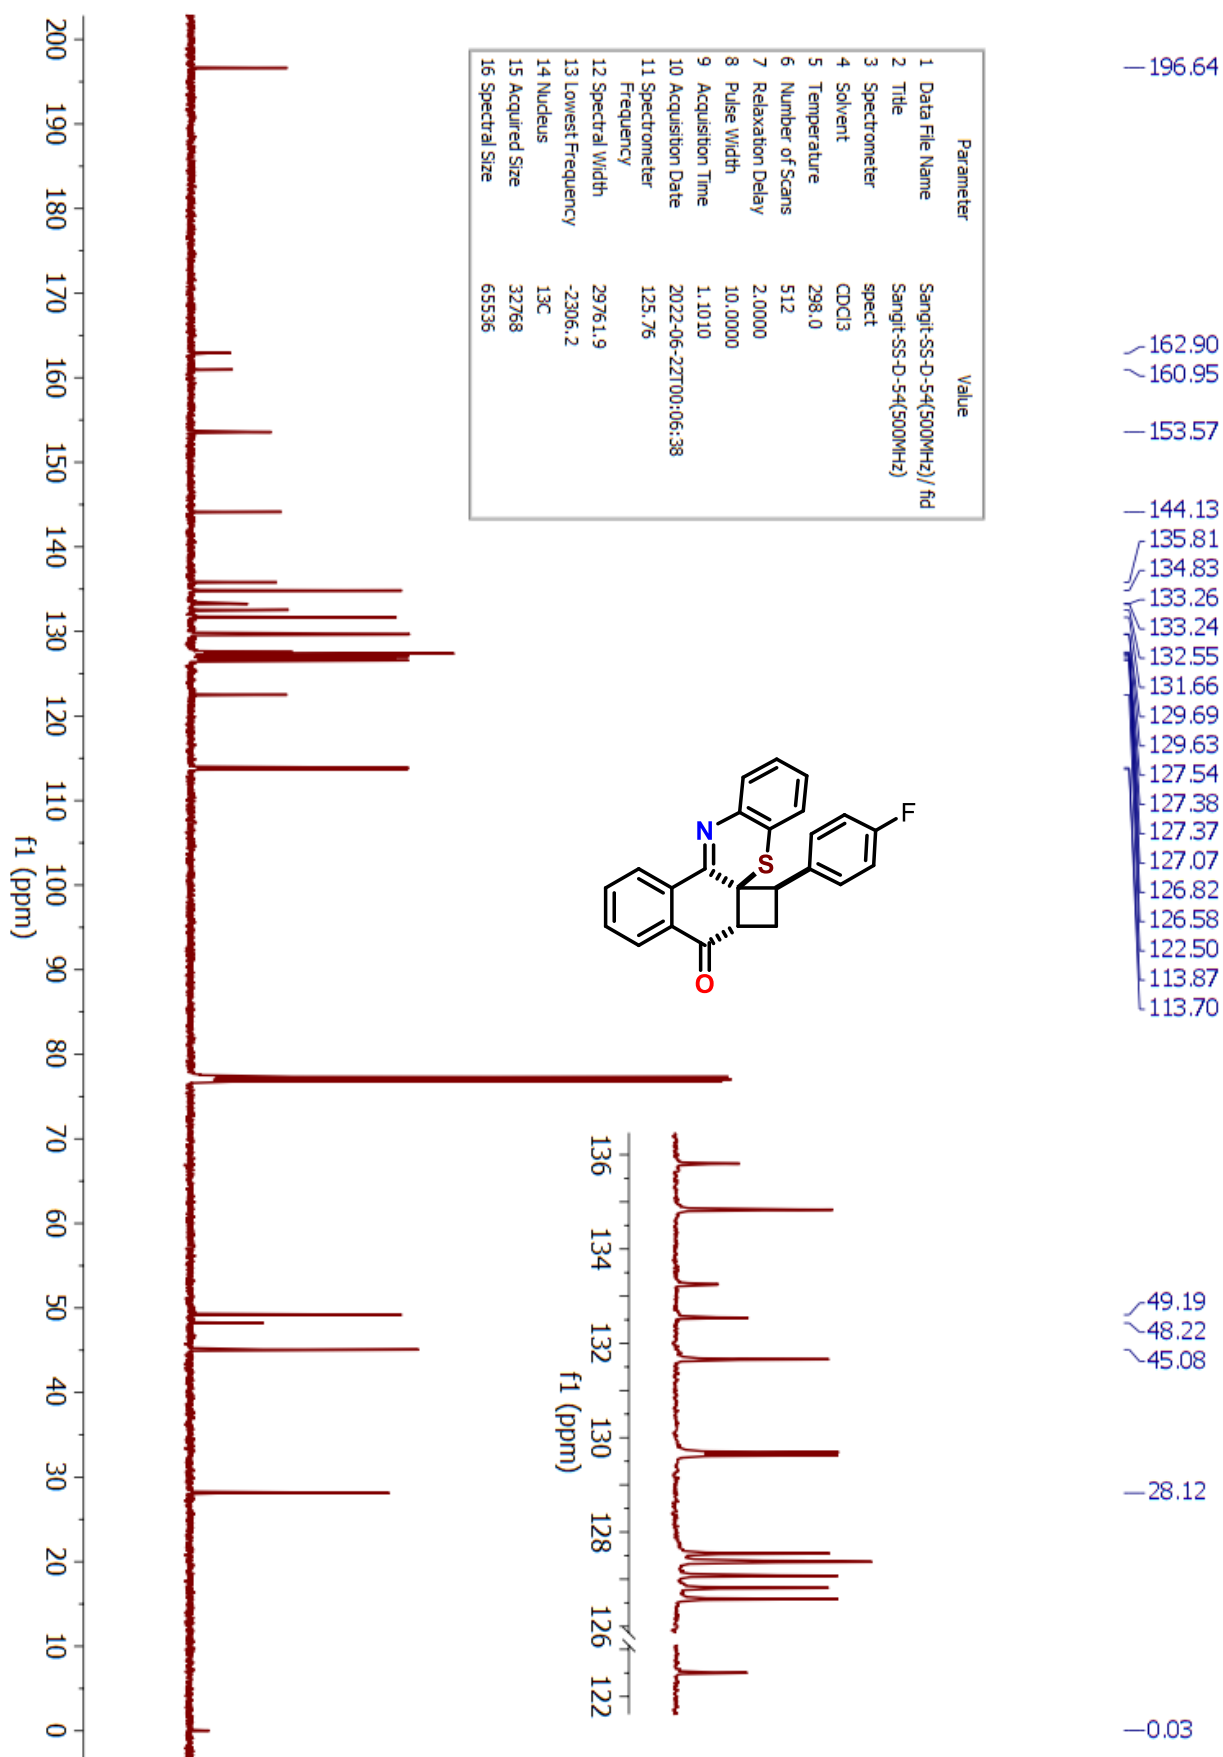

$^{19}\text{F}\{^1\text{H}\}$  NMR spectra of **21**

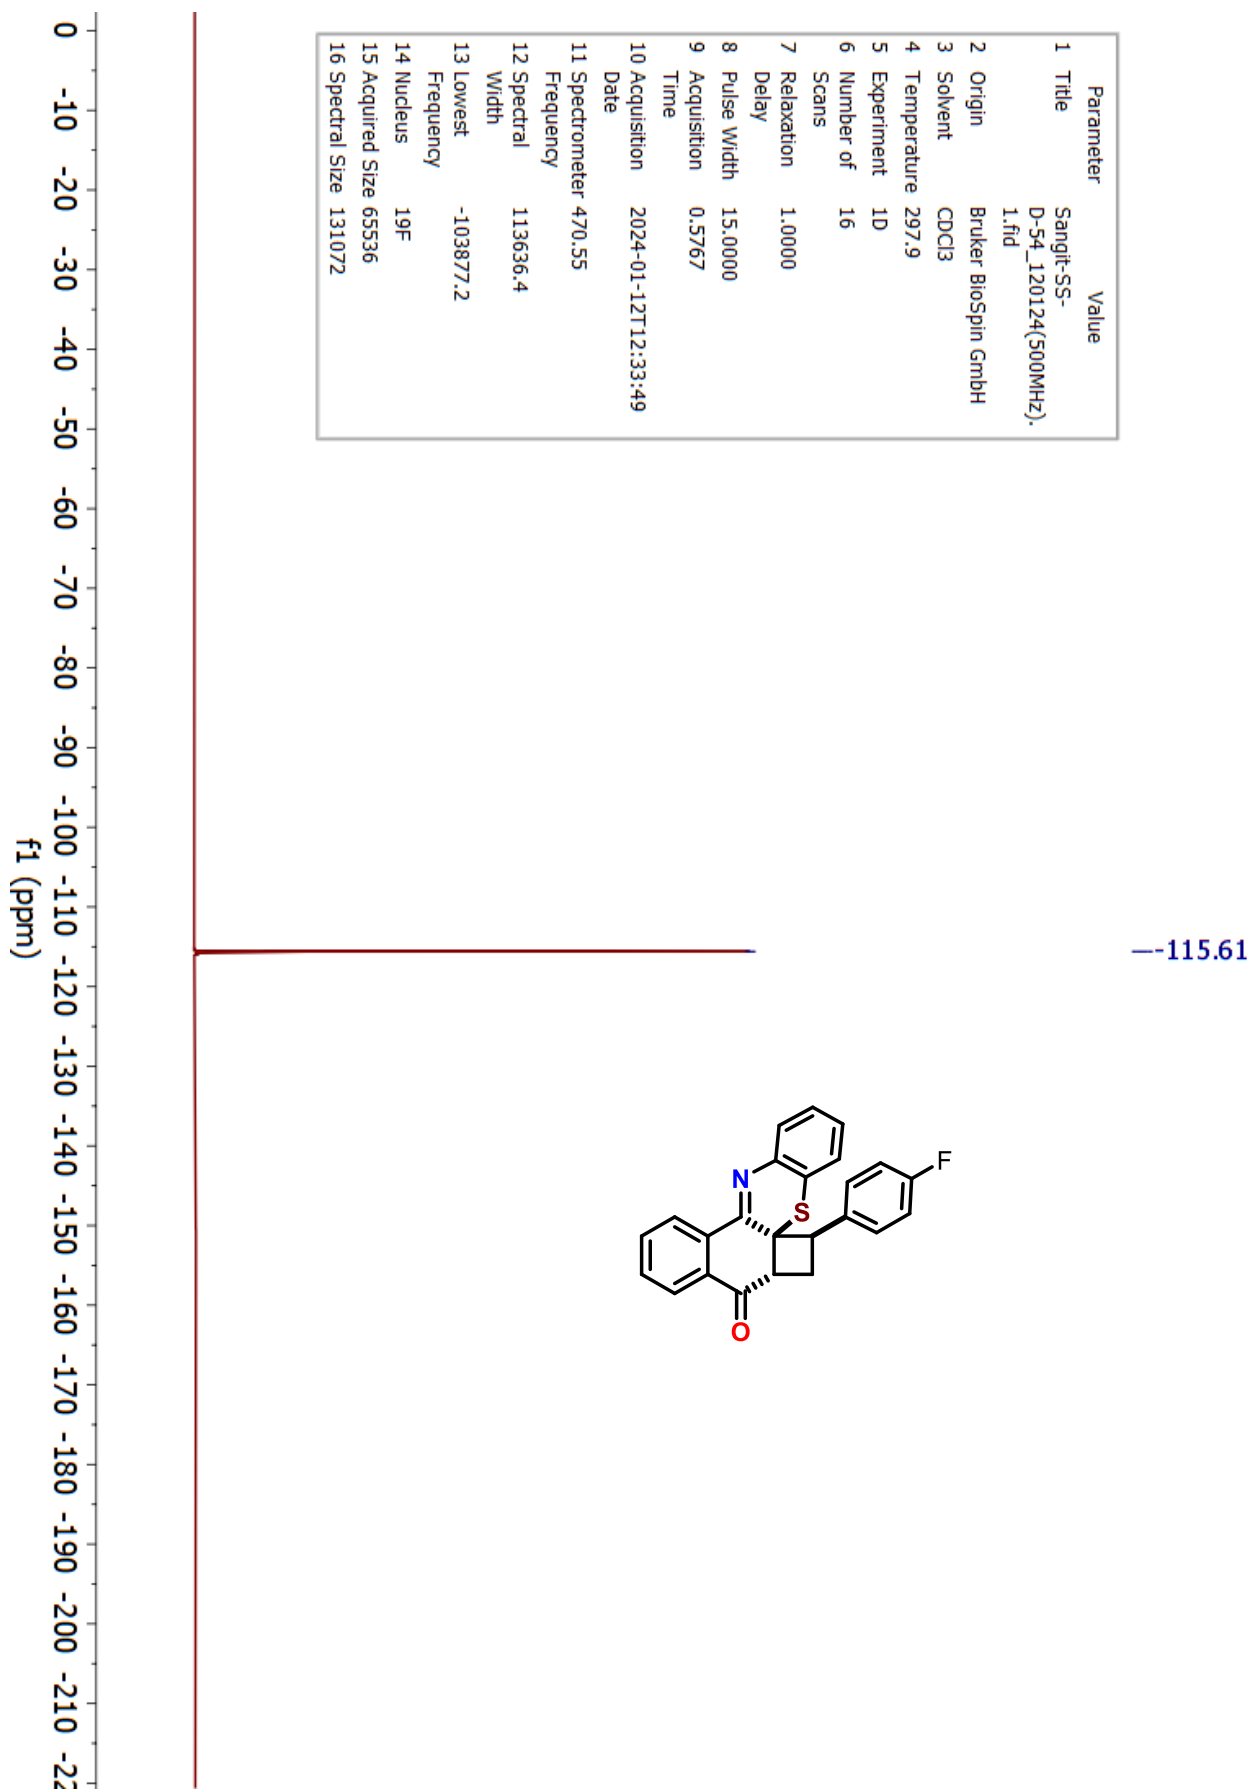





$^{13}\text{C}\{^1\text{H}\}$  NMR spectra of **2m**

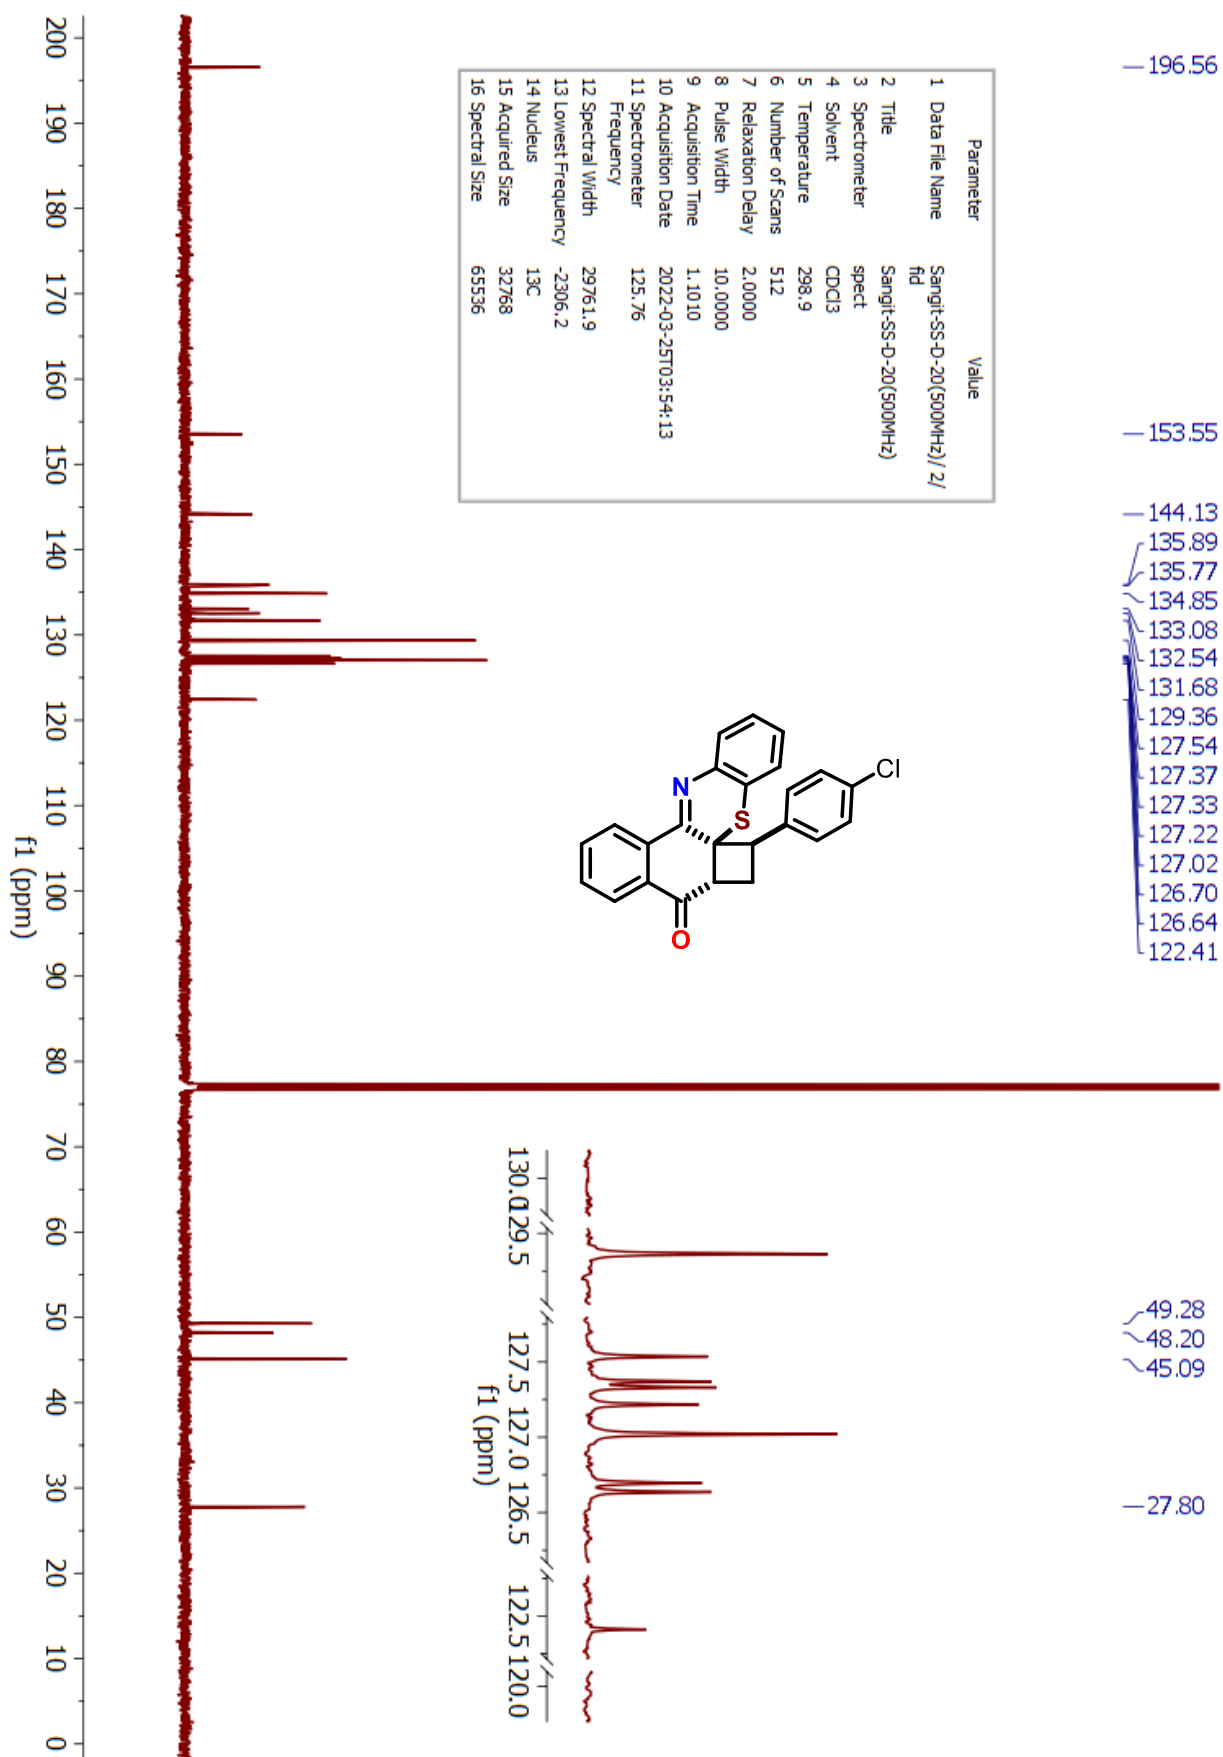

<sup>1</sup>H NMR spectra of **2n**

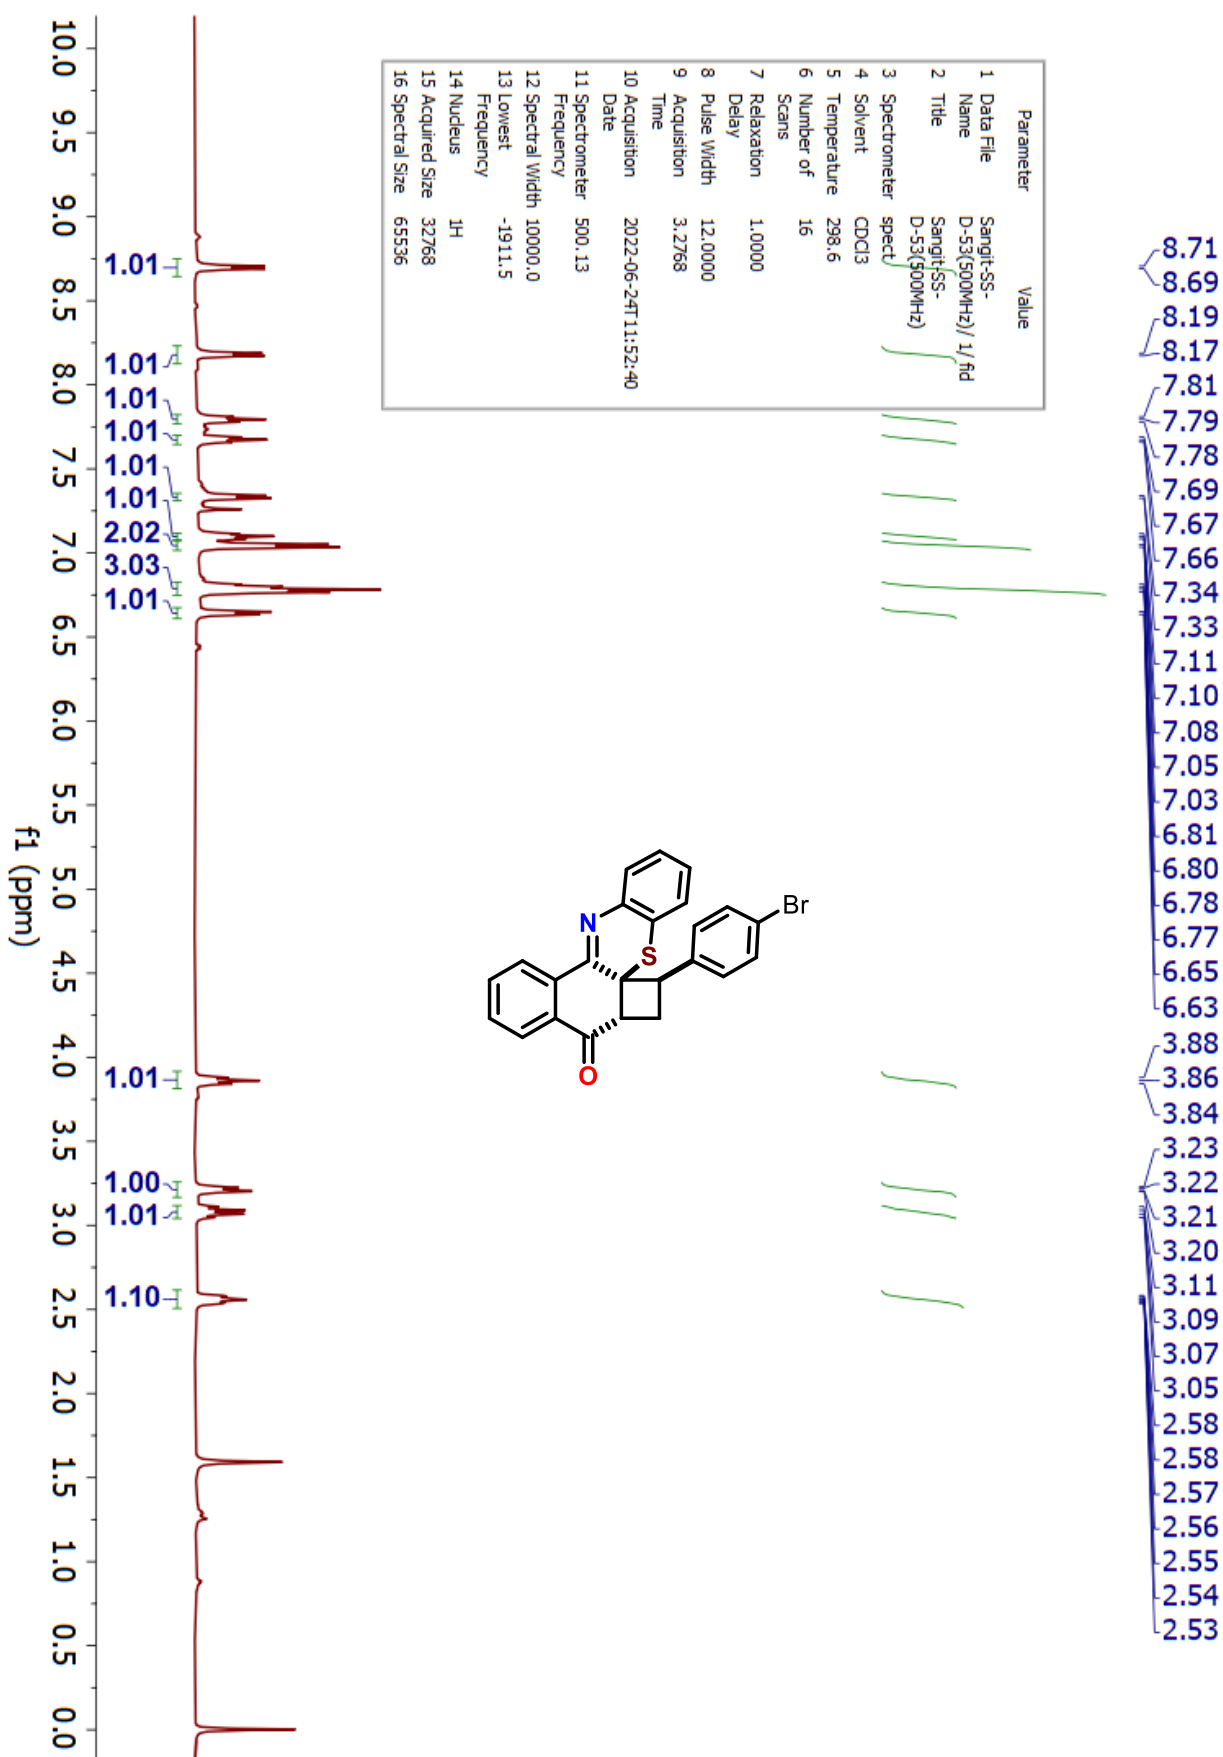

$^{13}\text{C}\{^1\text{H}\}$  NMR spectra of **2n**

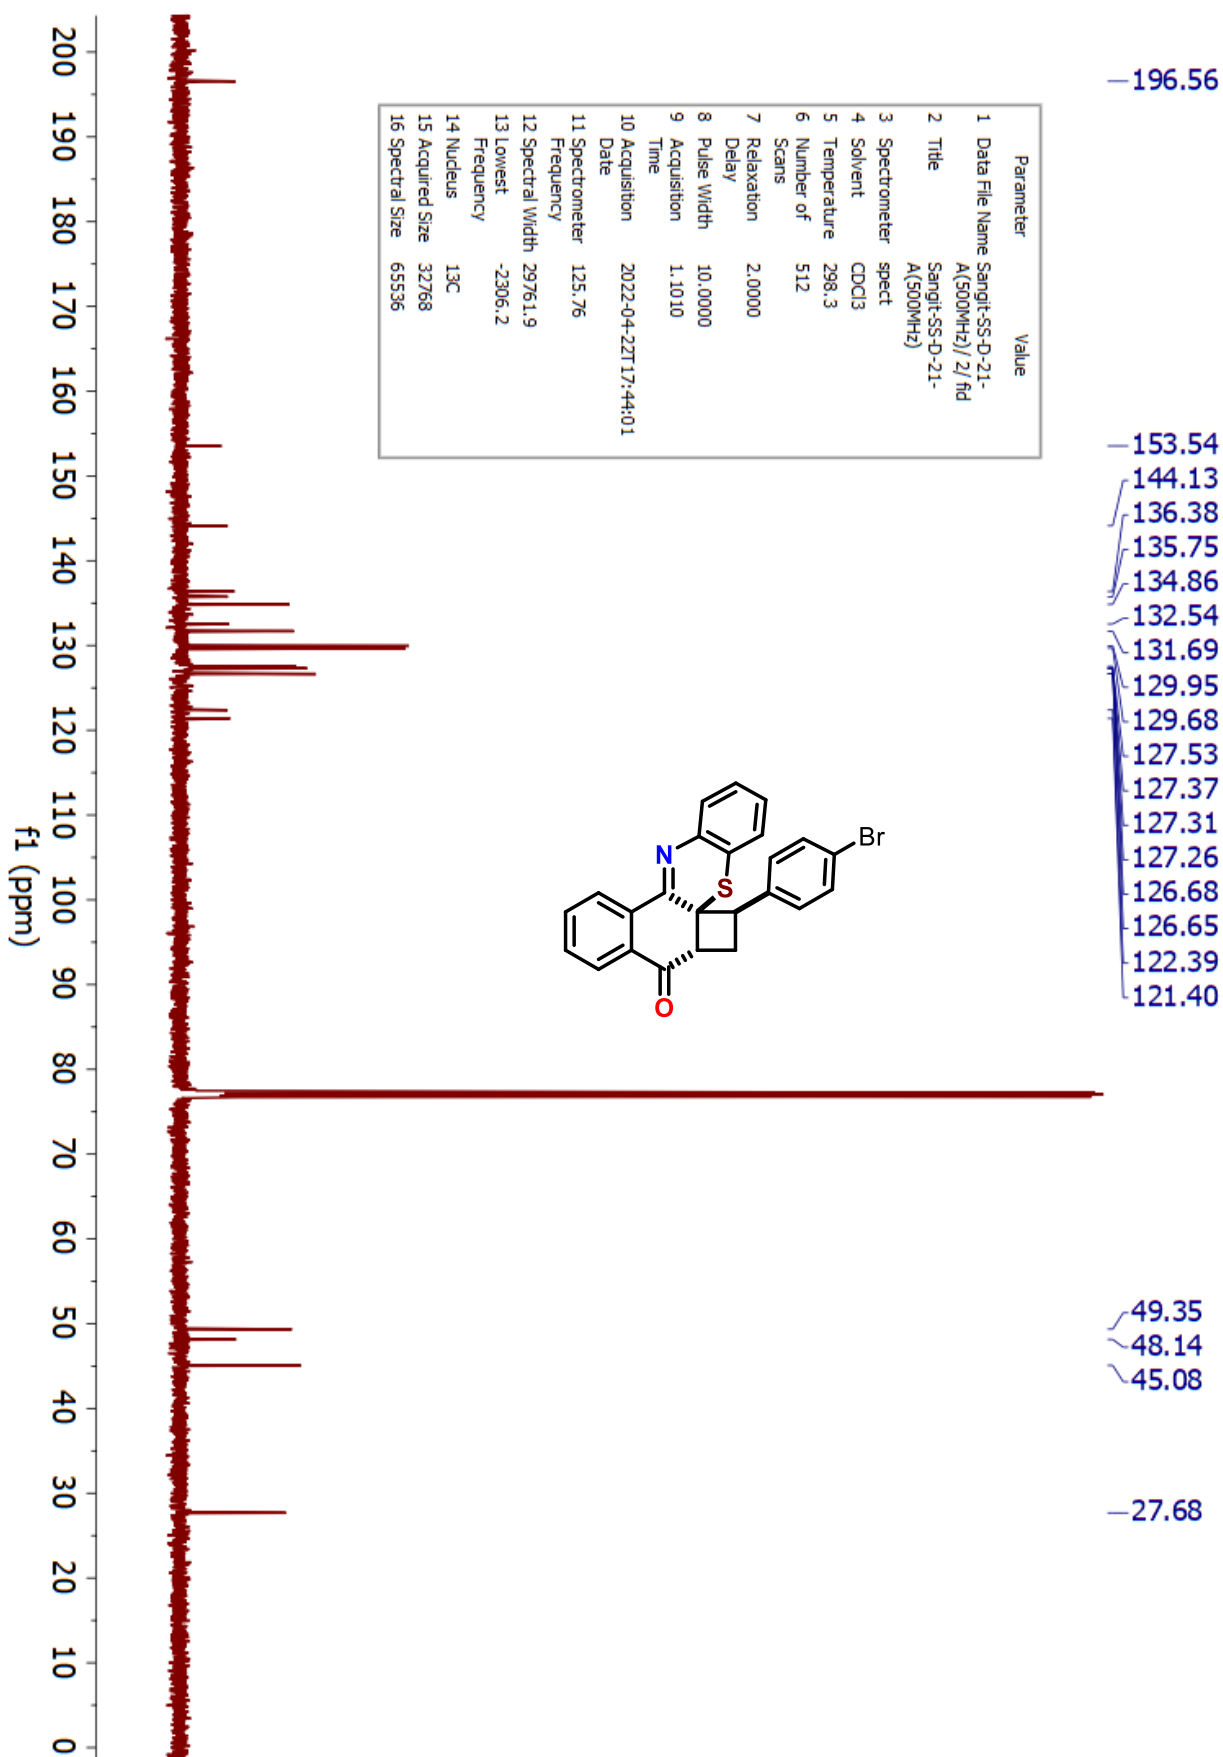

<sup>1</sup>H NMR spectra of **20**

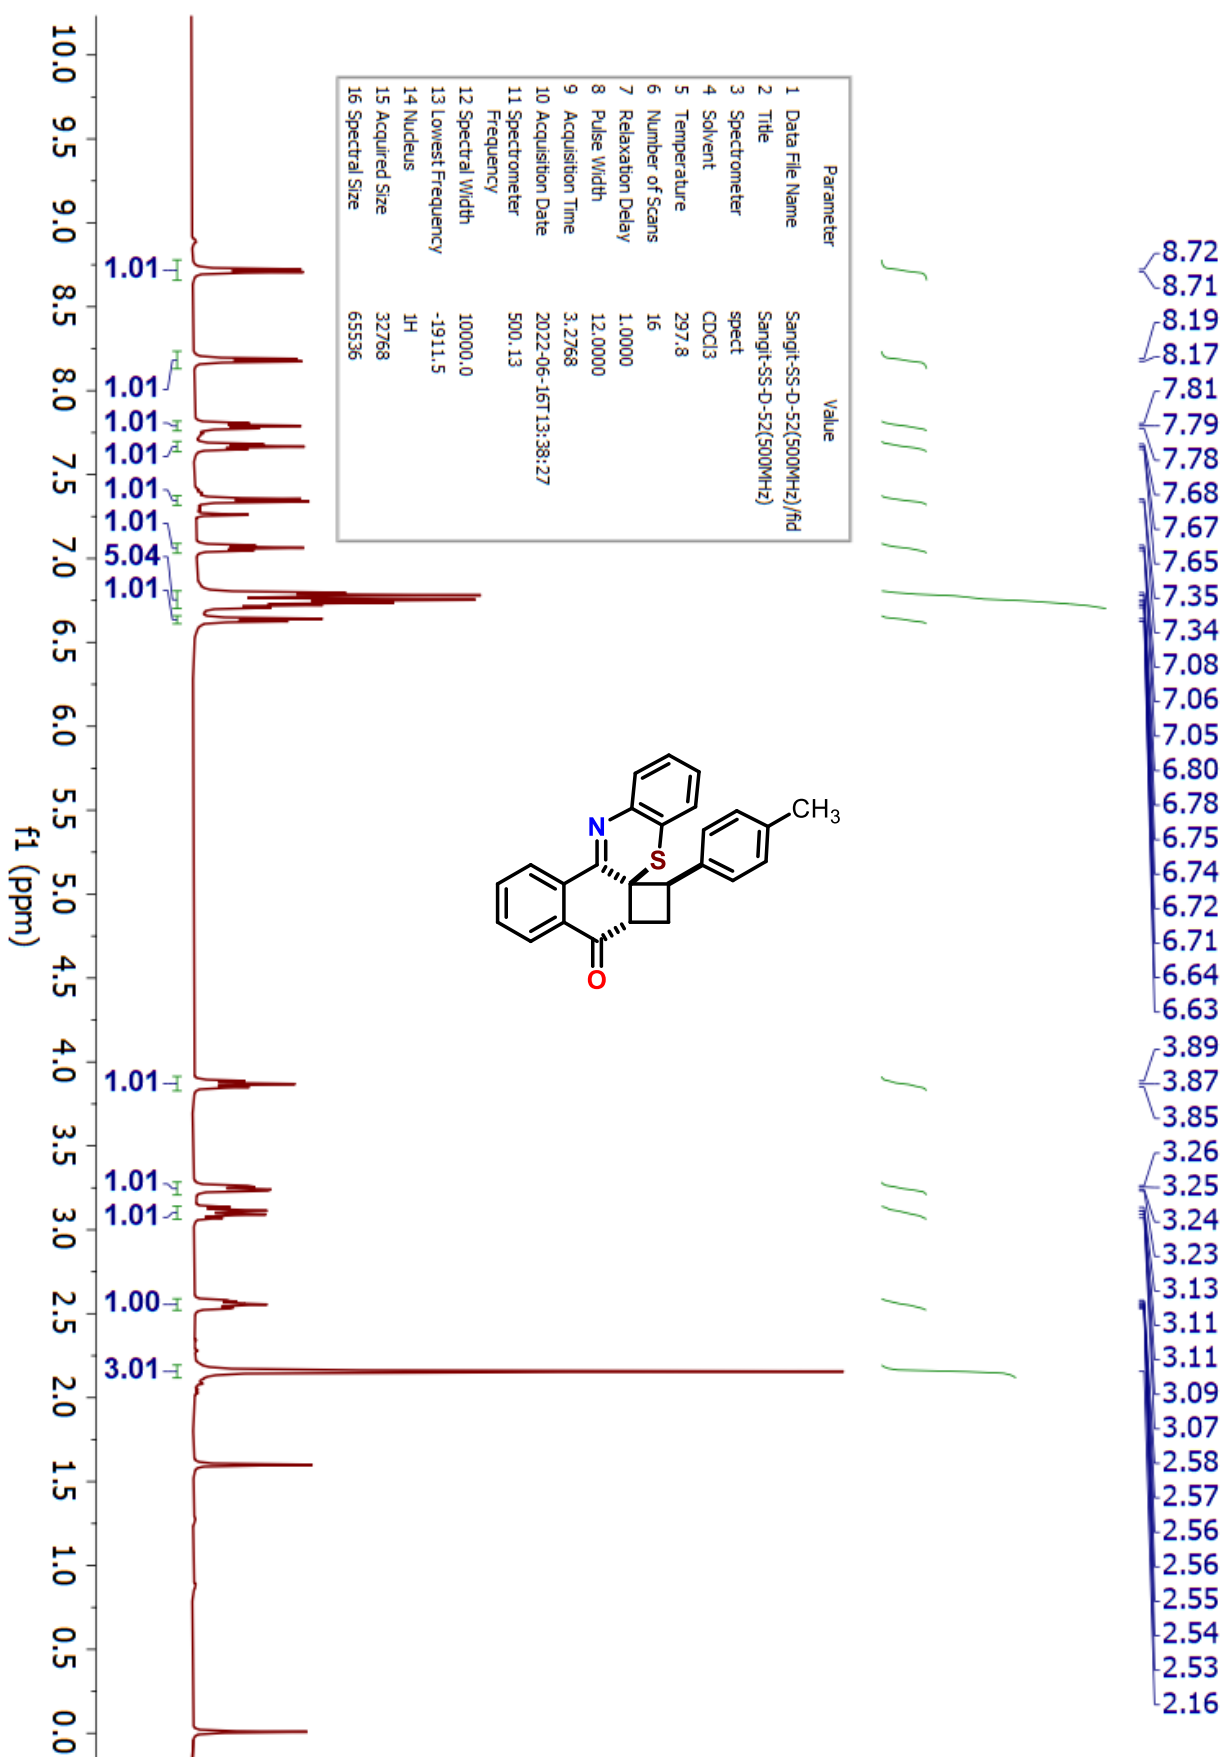

$^{13}\text{C}\{^1\text{H}\}$  NMR spectra of **2o**

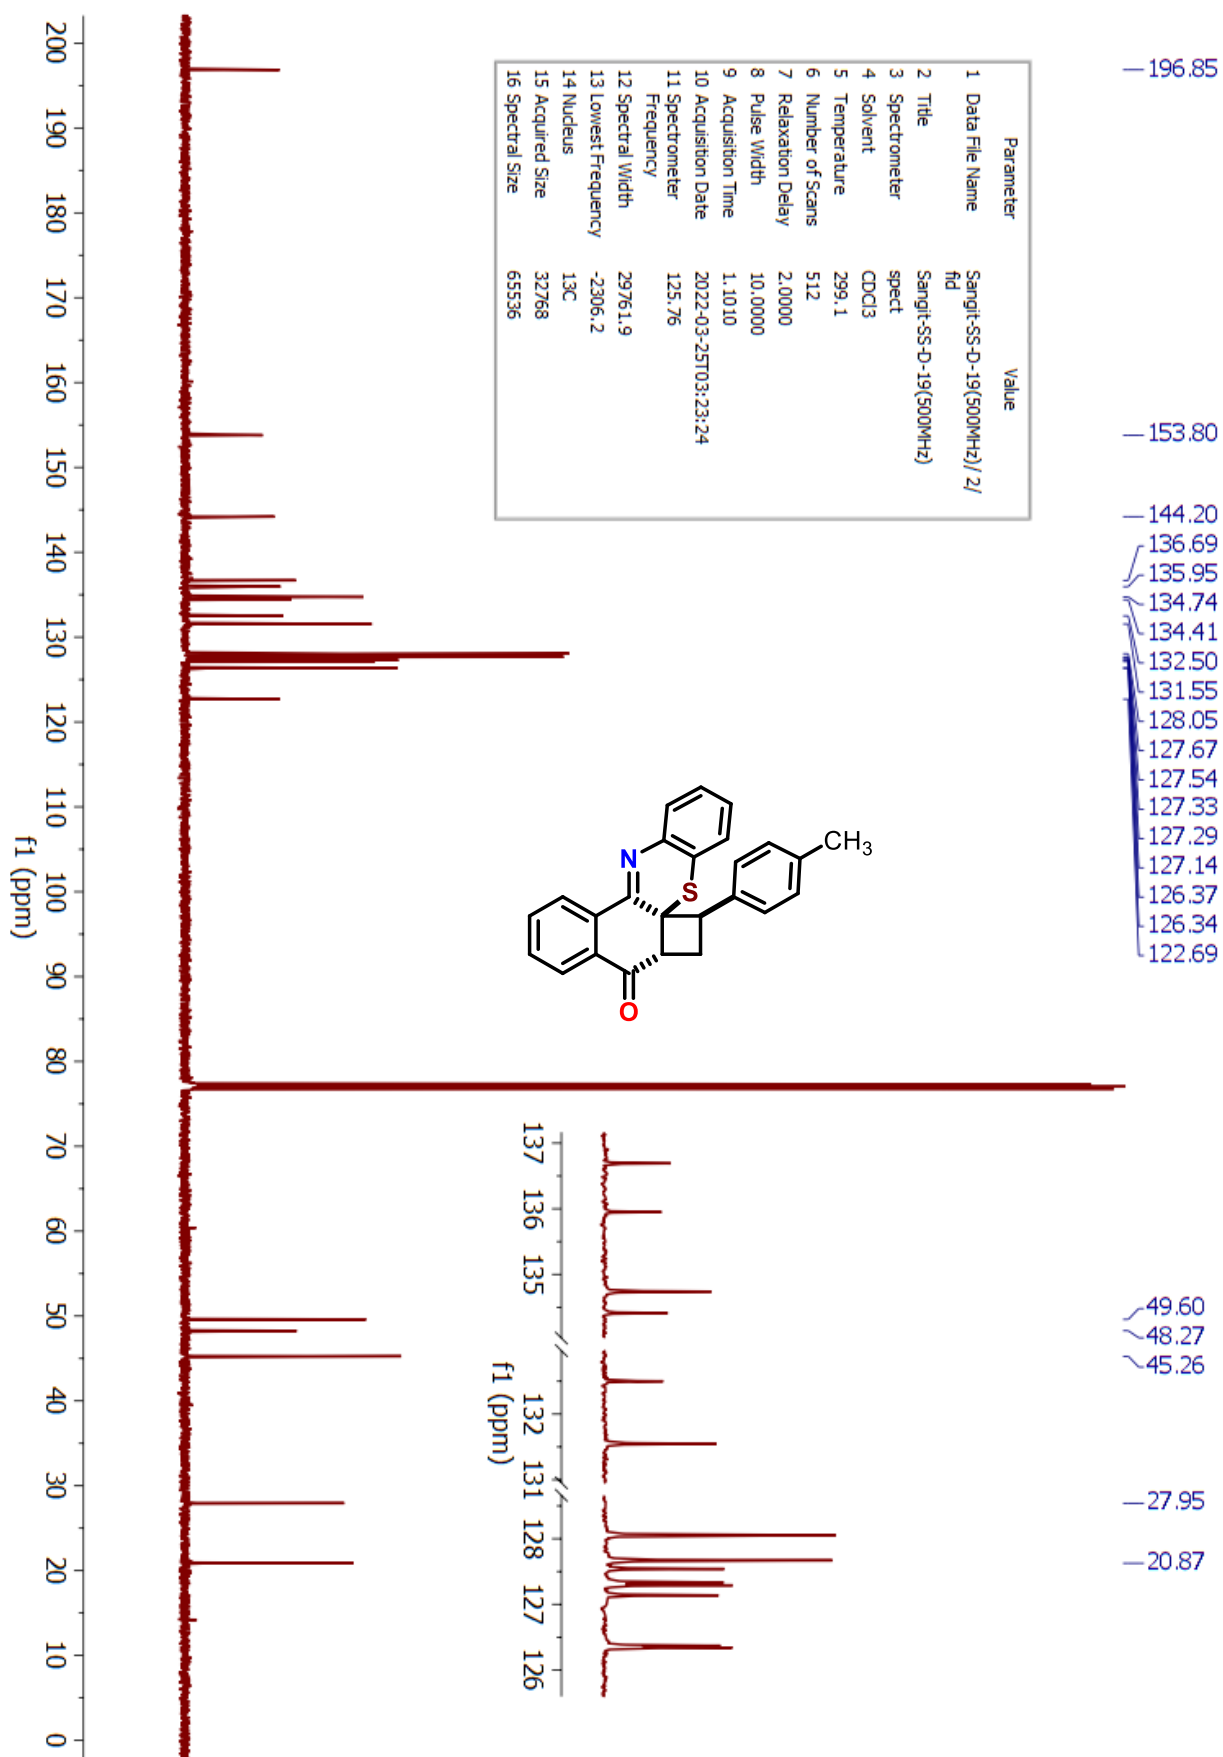

<sup>1</sup>H NMR spectra of **2p**

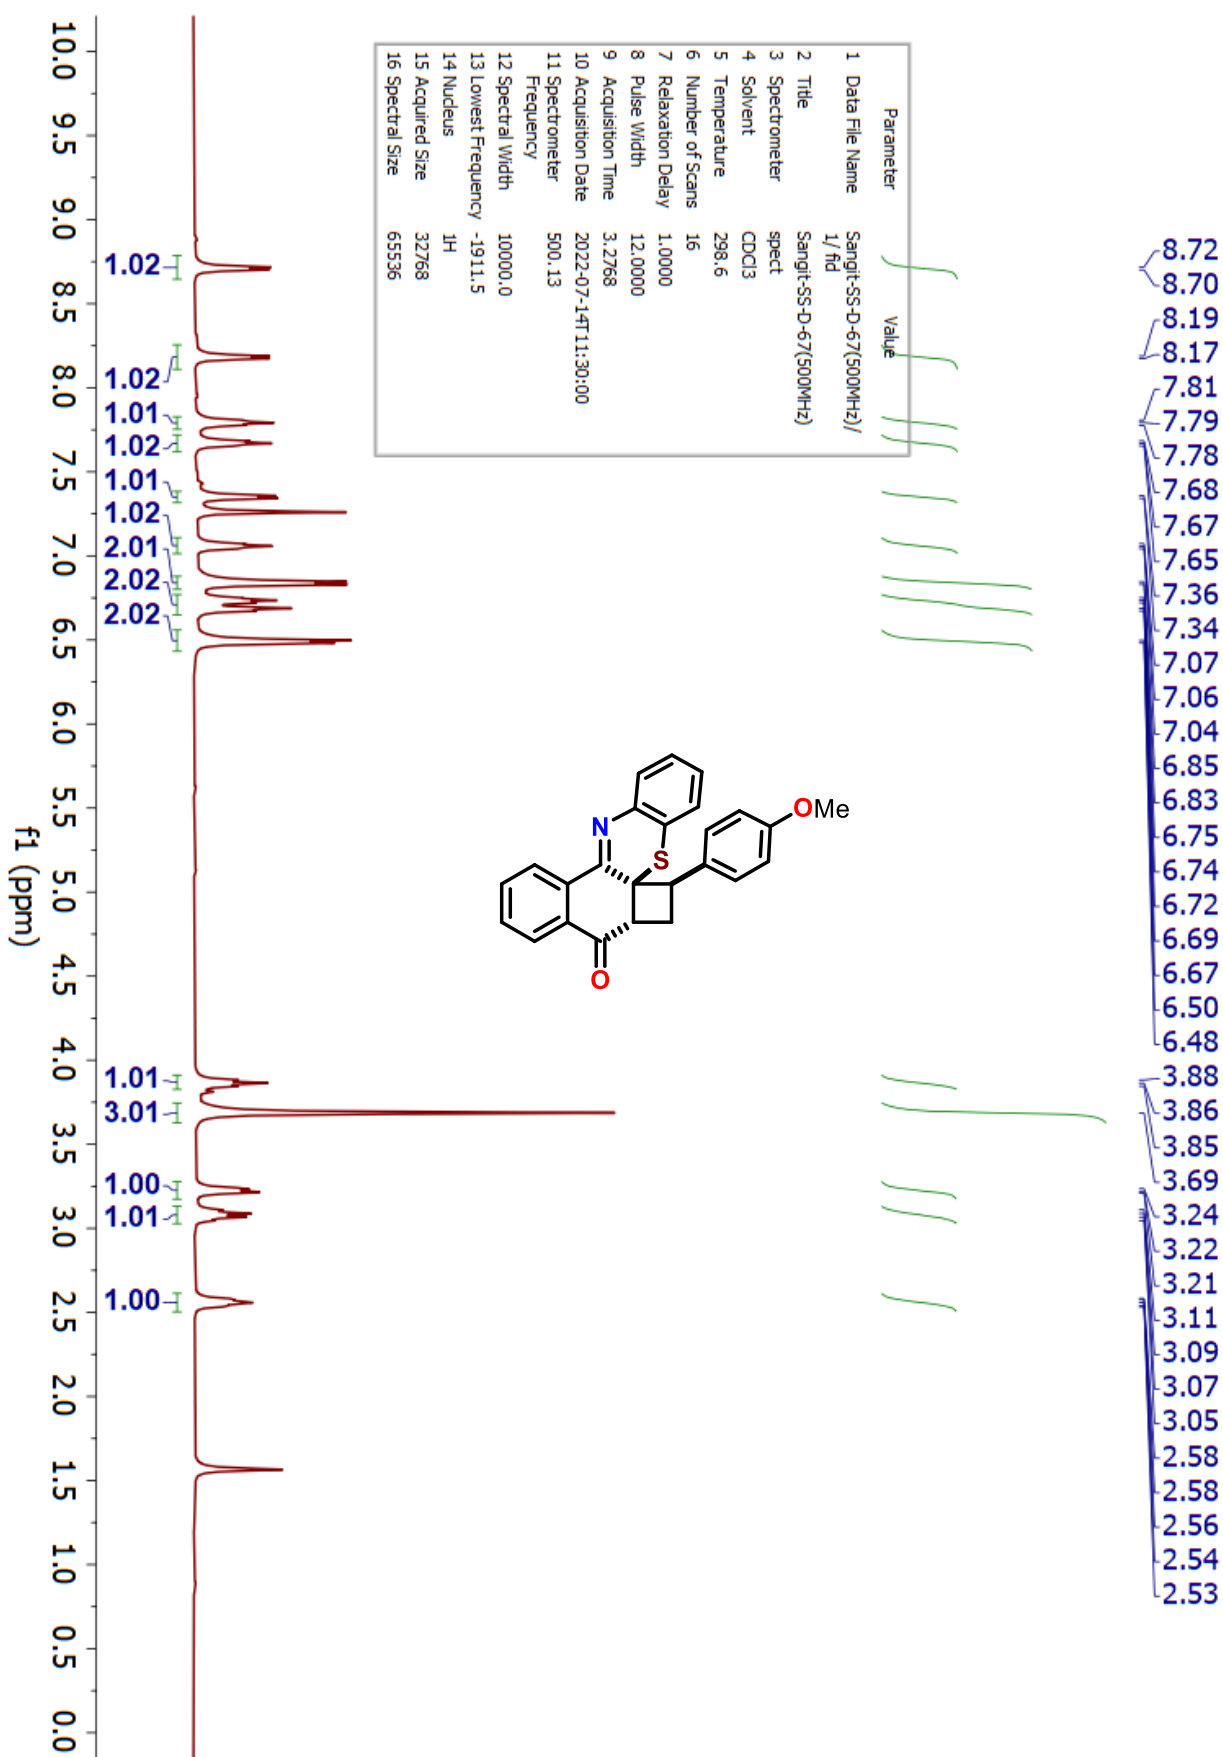

$^{13}\text{C}\{^1\text{H}\}$  NMR spectra of **2p**

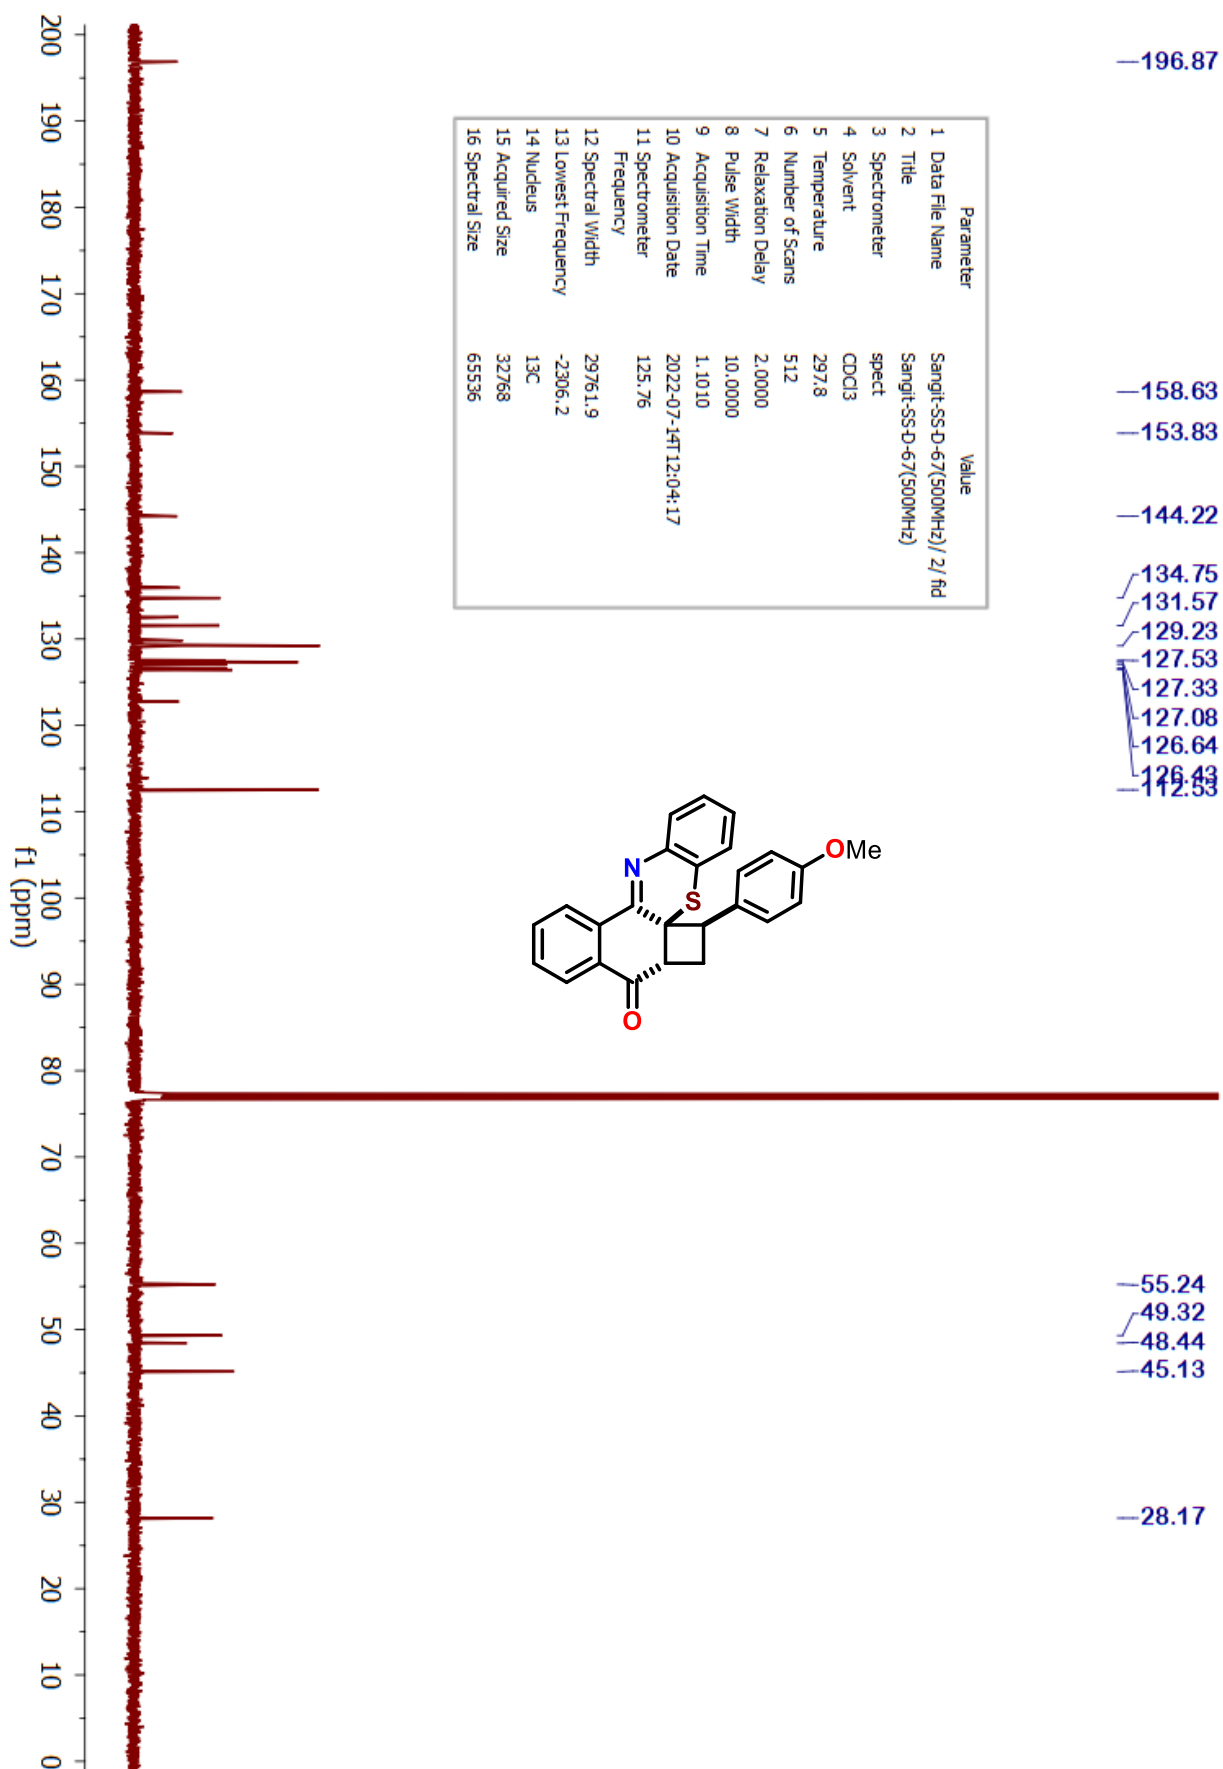

<sup>1</sup>H NMR spectra of **2q**

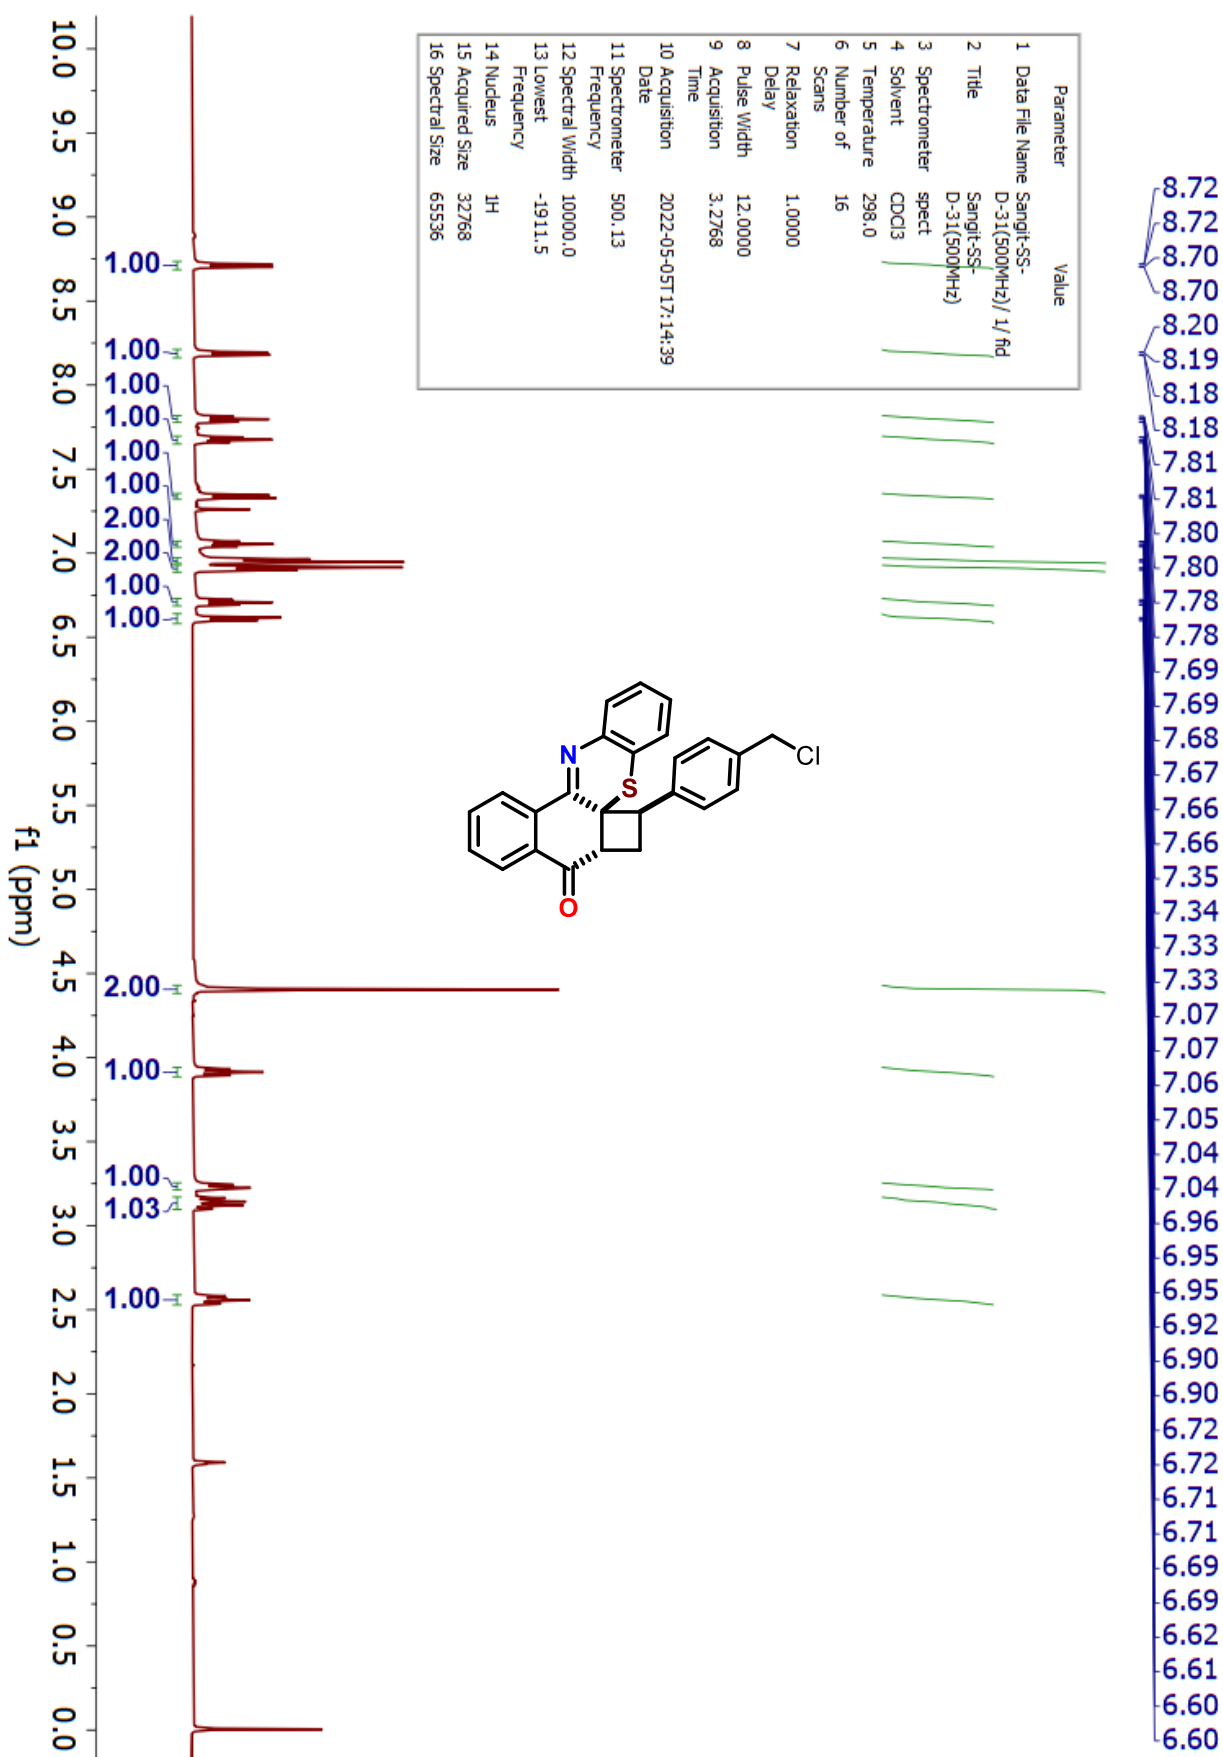



$^{13}\text{C}\{^1\text{H}\}$  NMR spectra of **2q**

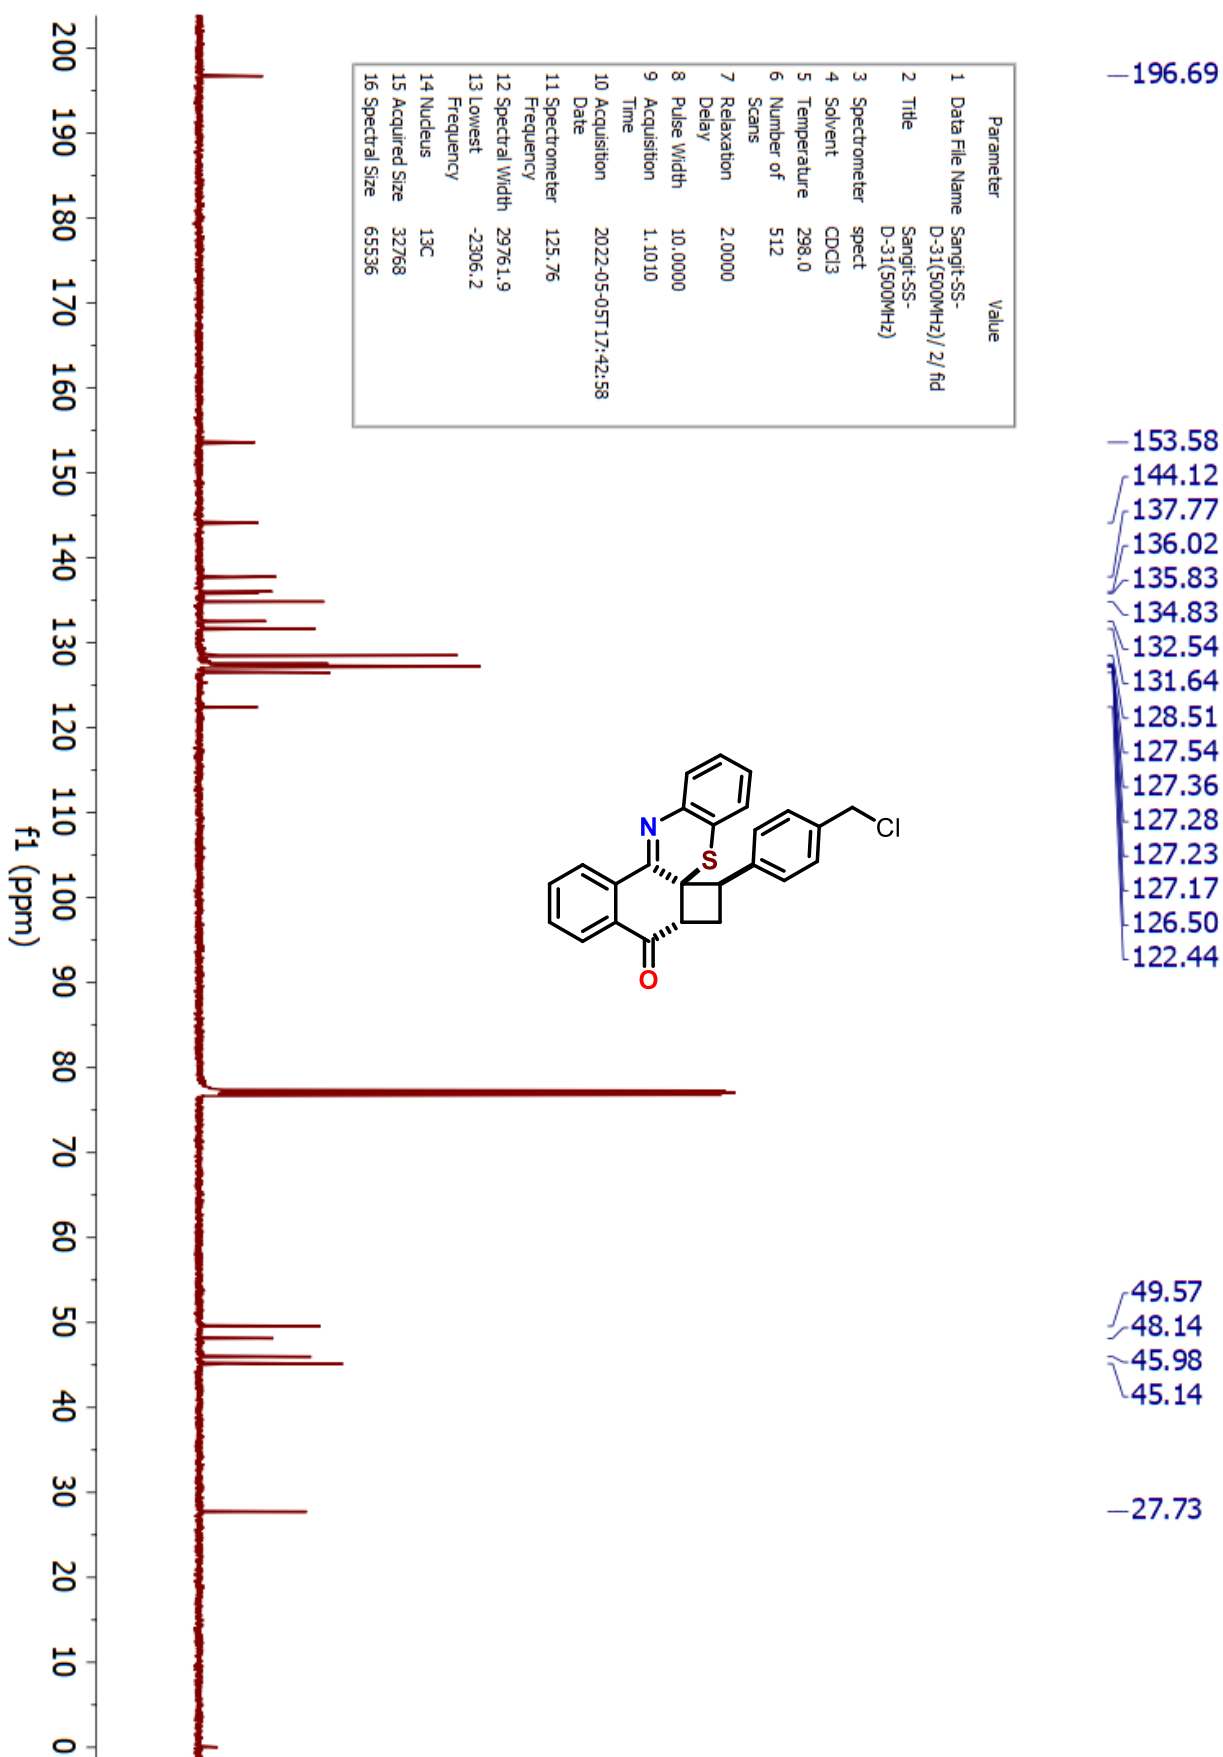

<sup>1</sup>H NMR spectra of **2r**

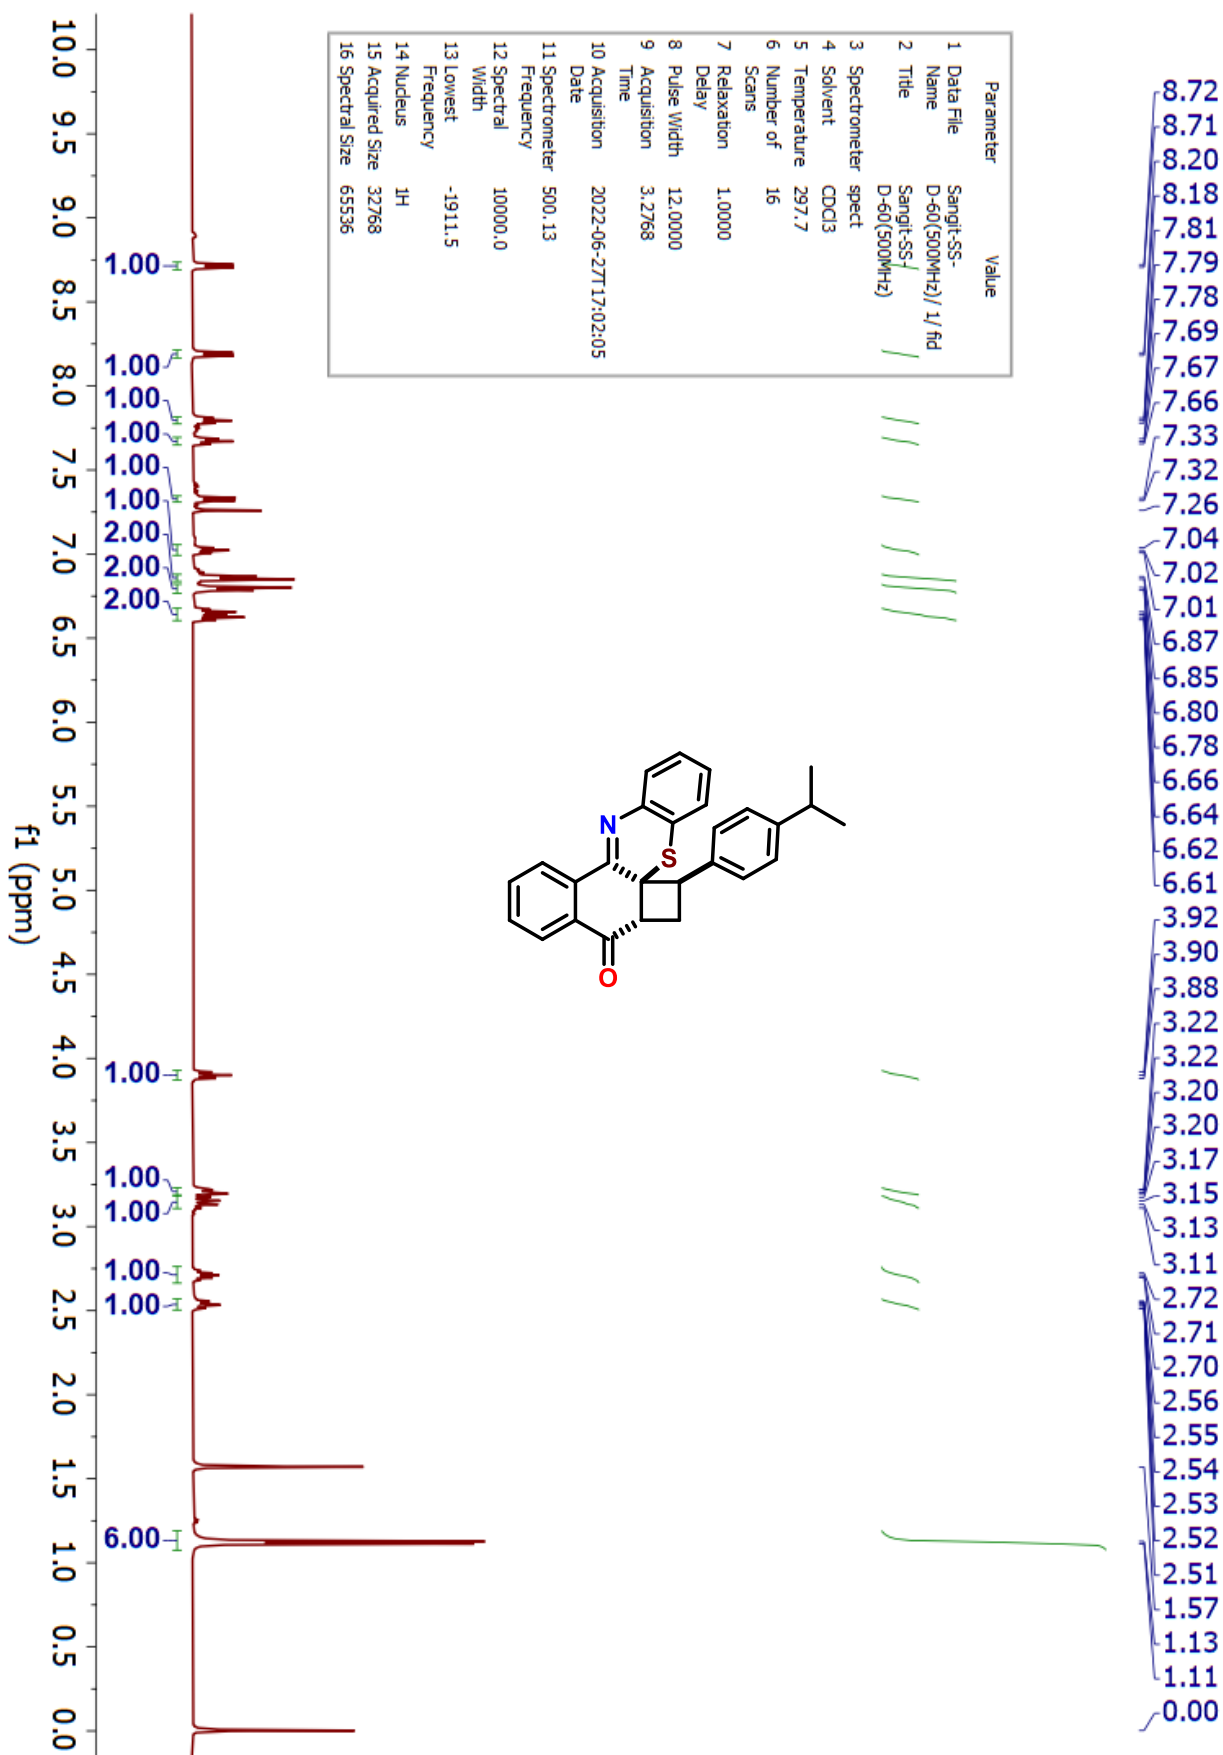

$^{13}\text{C}\{^1\text{H}\}$  NMR spectra of **2r**

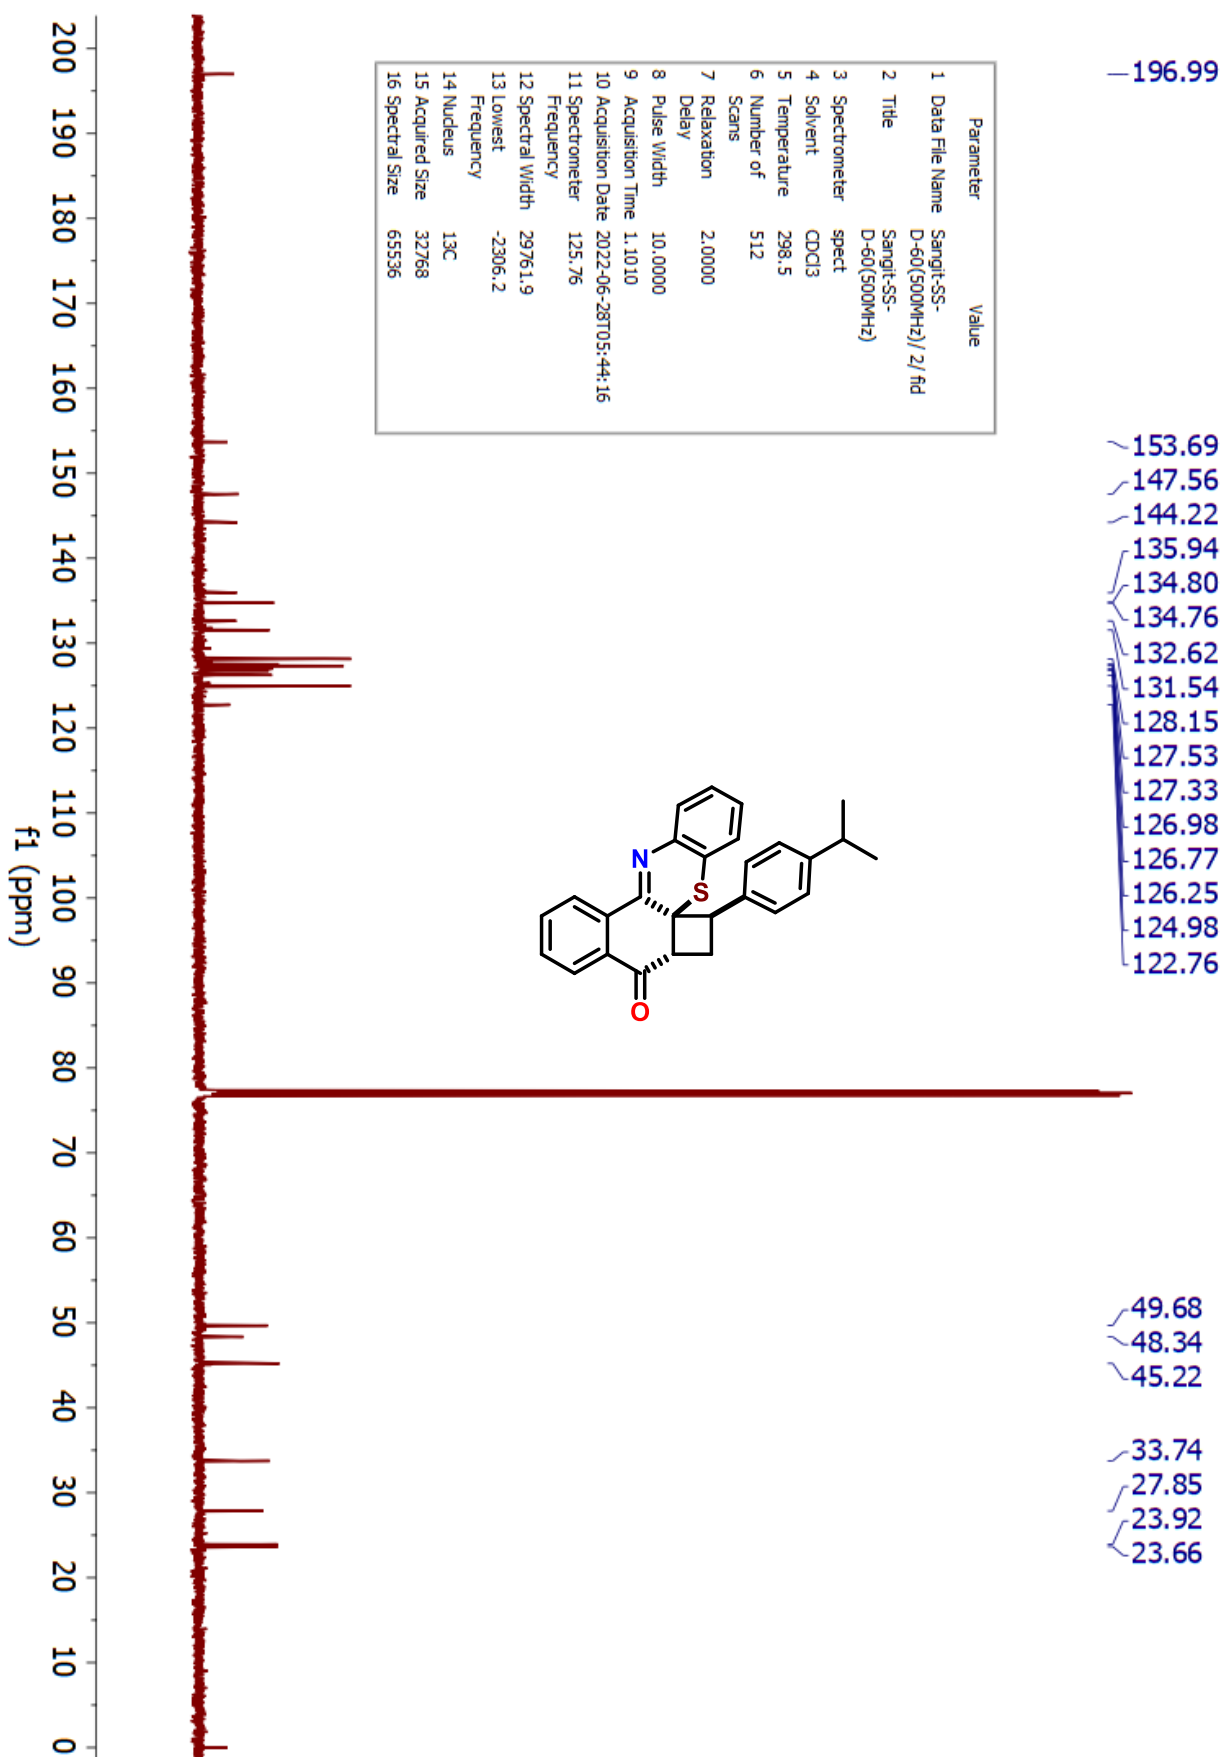

| Parameter                 | Value                          |
|---------------------------|--------------------------------|
| 1 Data File Name          | Sangit-SS-D-60(500MHz)/ 2/ f1d |
| 2 Title                   | Sangit-SS-D-60(500MHz)         |
| 3 Spectrometer            | spect                          |
| 4 Solvent                 | CDCl3                          |
| 5 Temperature             | 298.5                          |
| 6 Number of Scans         | 512                            |
| 7 Relaxation Delay        | 2.0000                         |
| 8 Pulse Width             | 10.0000                        |
| 9 Acquisition Time        | 1.1010                         |
| 10 Acquisition Date       | 2022-06-28T05:44:16            |
| 11 Spectrometer Frequency | 125.76                         |
| 12 Spectral Width         | 29761.9                        |
| 13 Lowest Frequency       | -2306.2                        |
| 14 Nucleus                | $^{13}\text{C}$                |
| 15 Acquired Size          | 32768                          |
| 16 Spectral Size          | 65536                          |

<sup>1</sup>H NMR spectra of **2s**

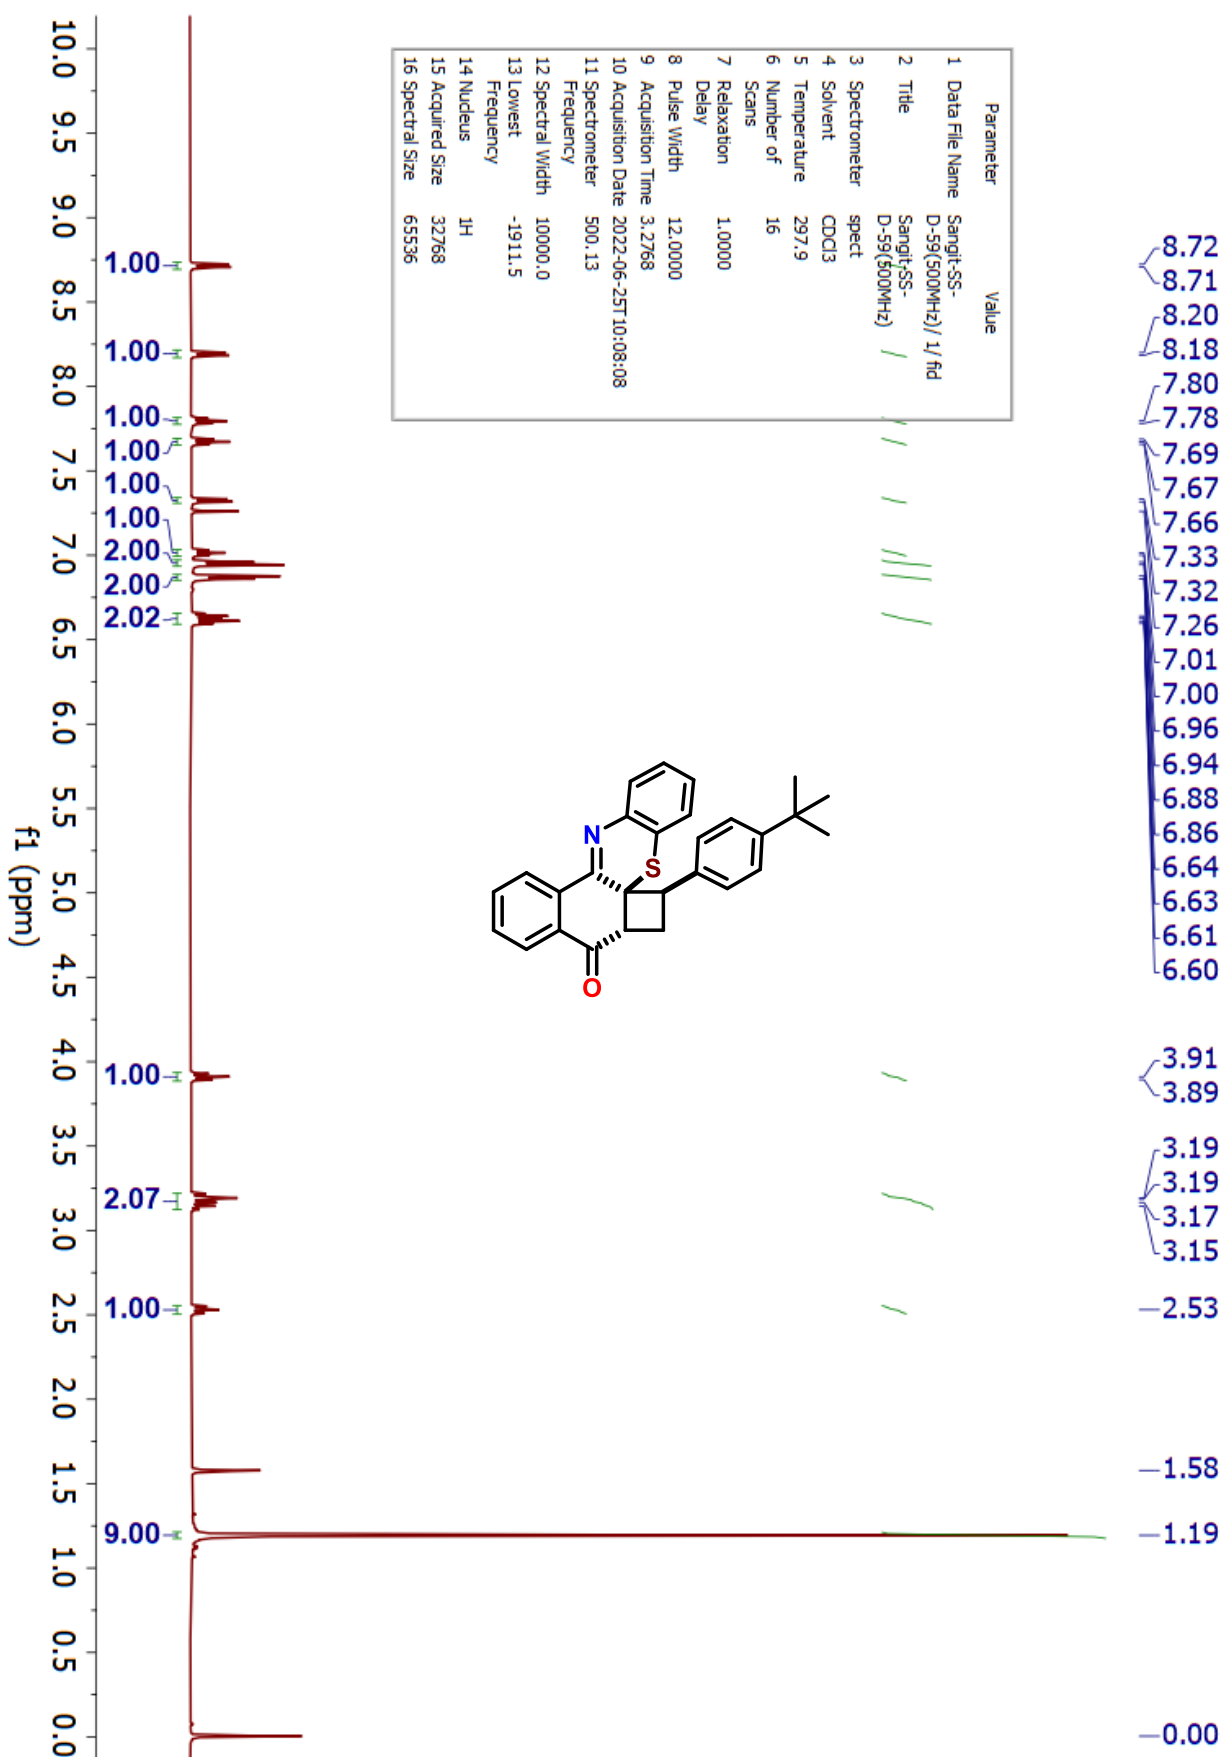

$^{13}\text{C}\{^1\text{H}\}$  NMR spectra of **2s**

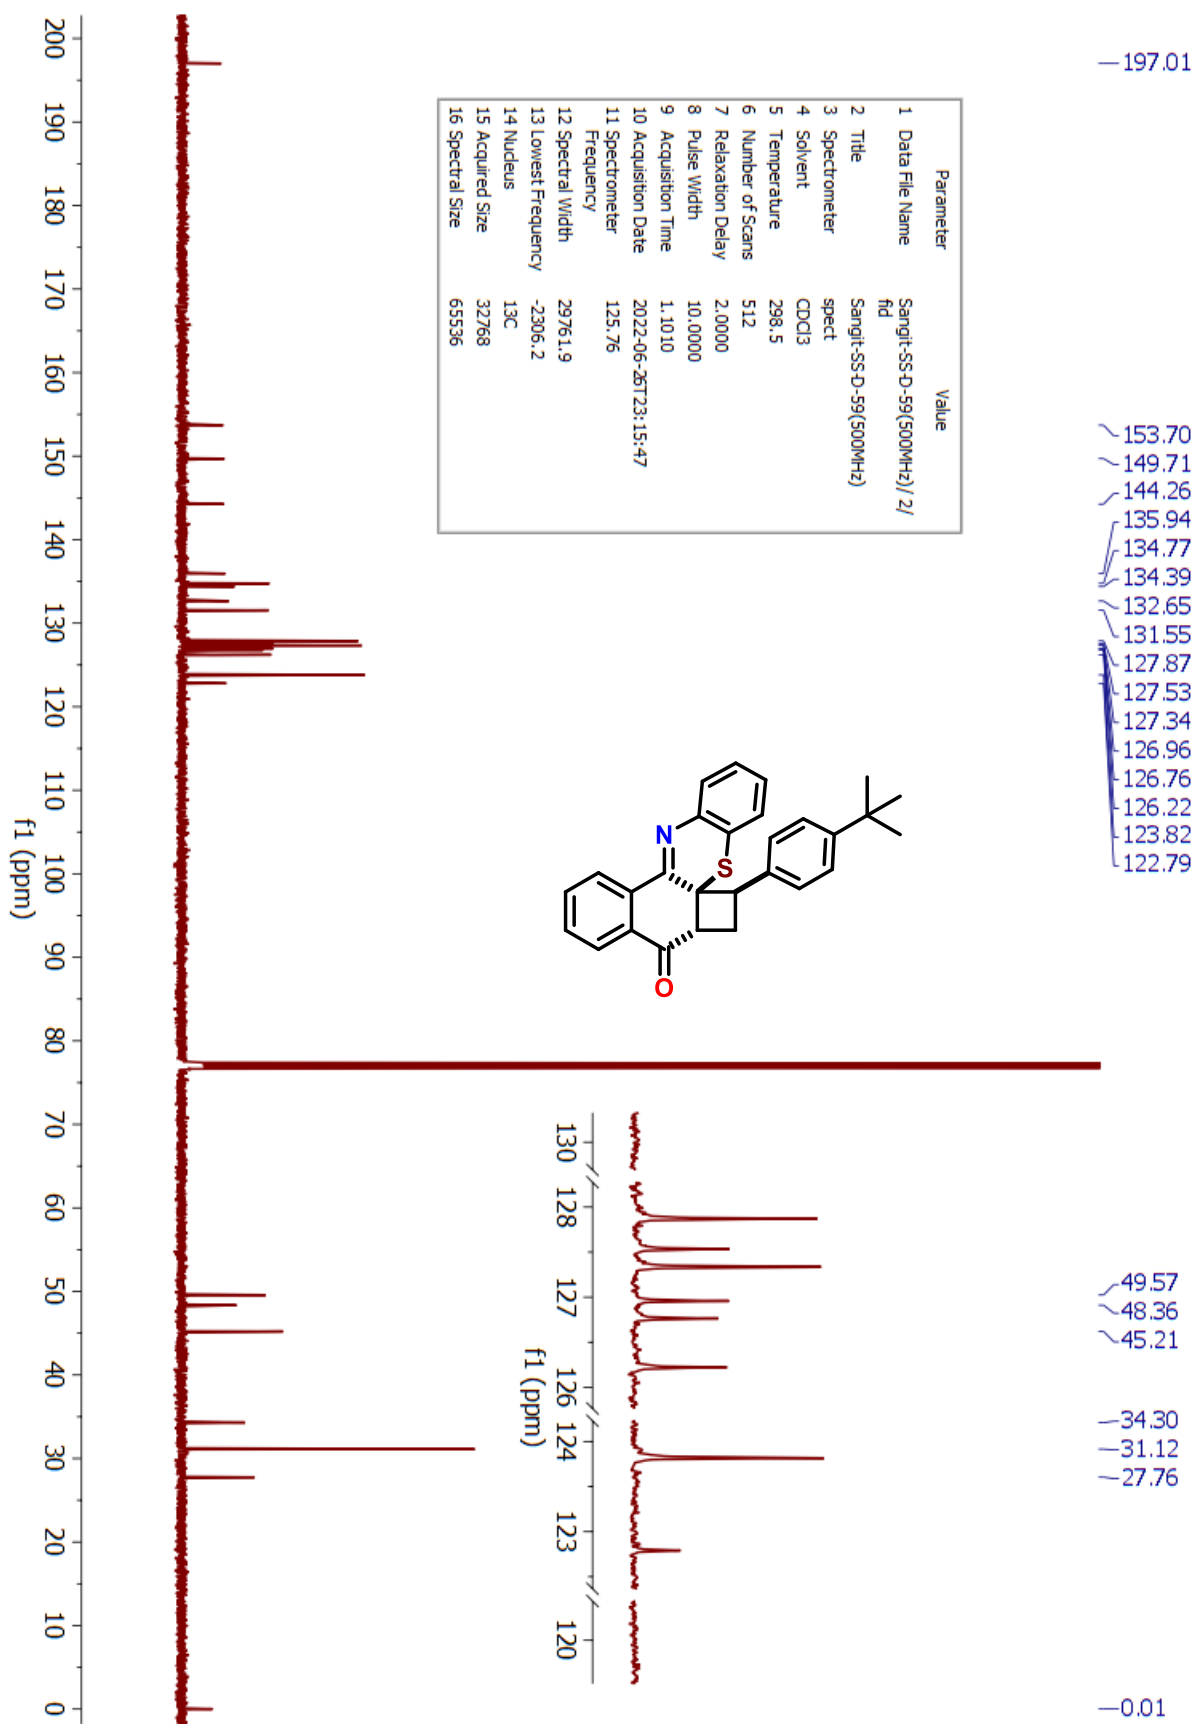

<sup>1</sup>H NMR spectra of **2t**

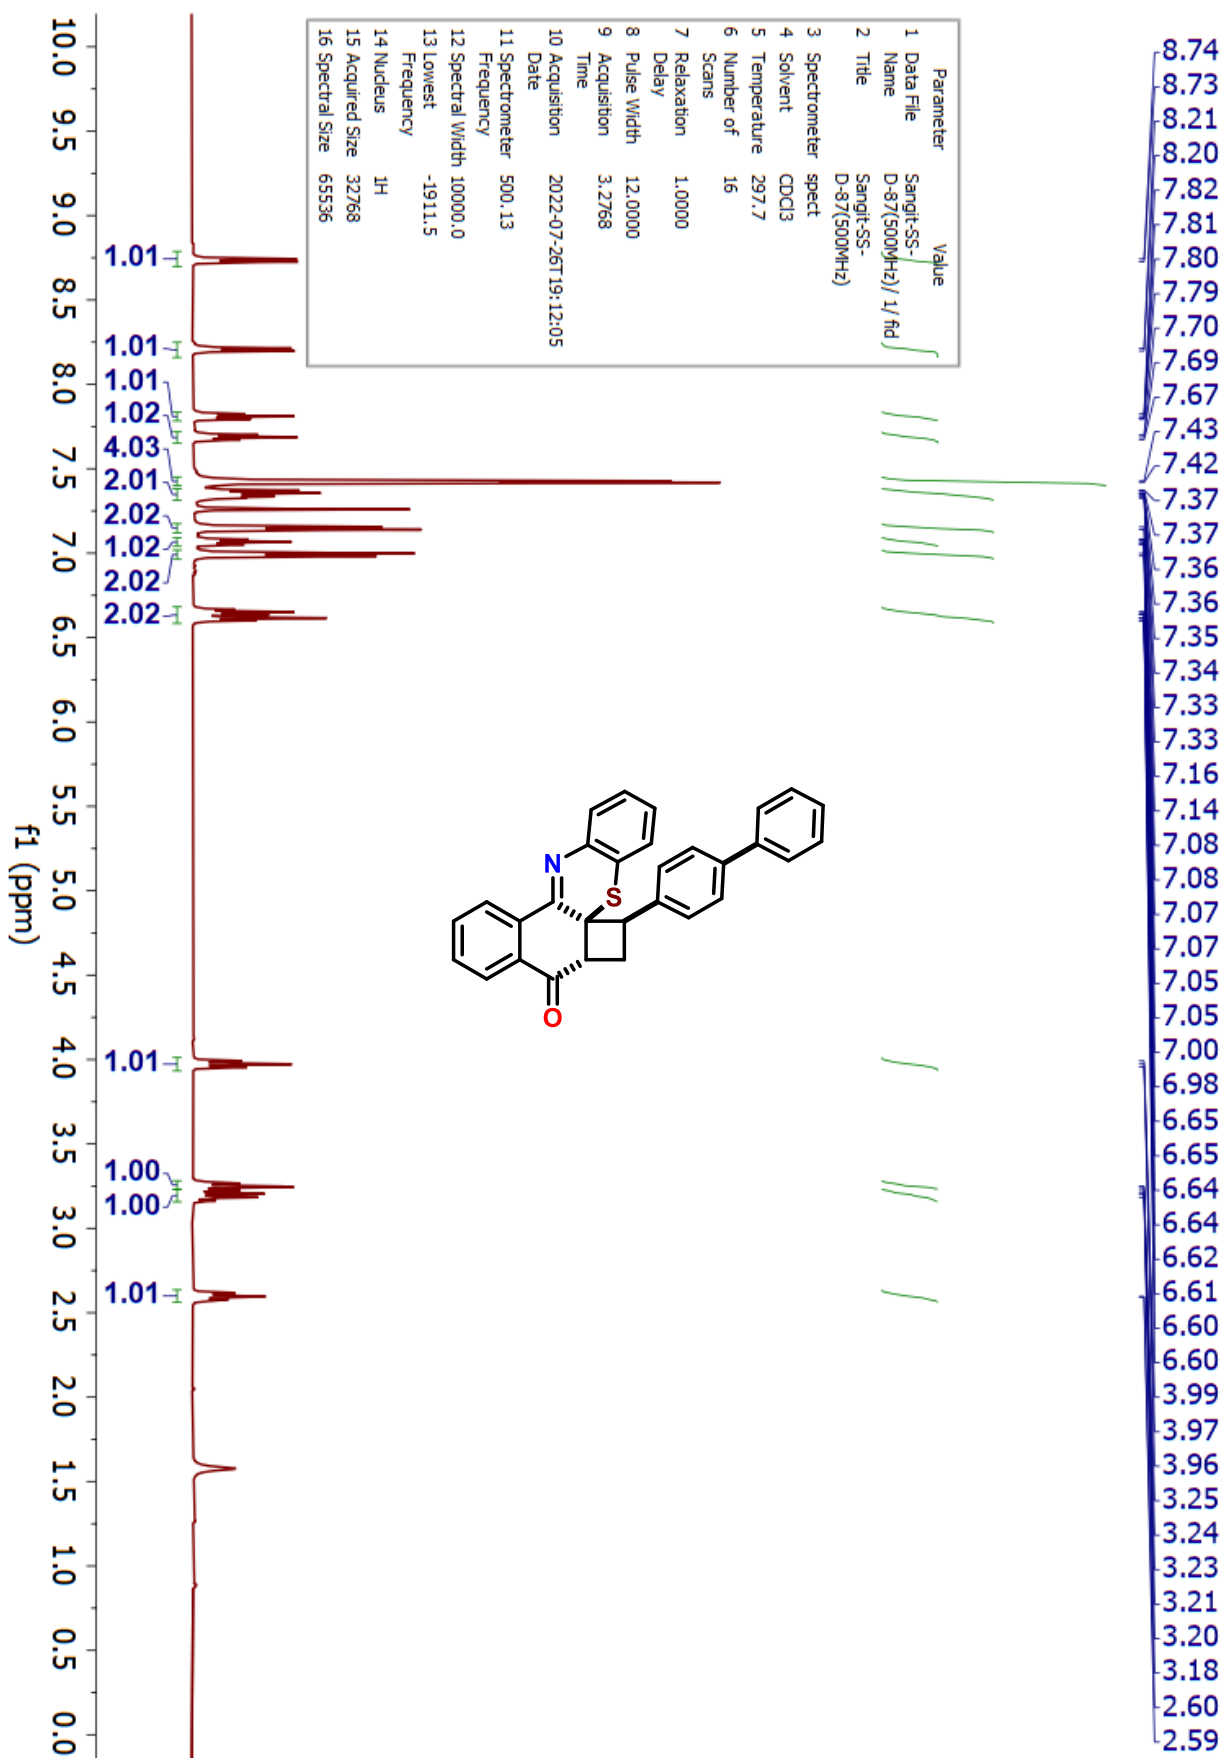

$^{13}\text{C}\{^1\text{H}\}$  NMR spectra of **2t**

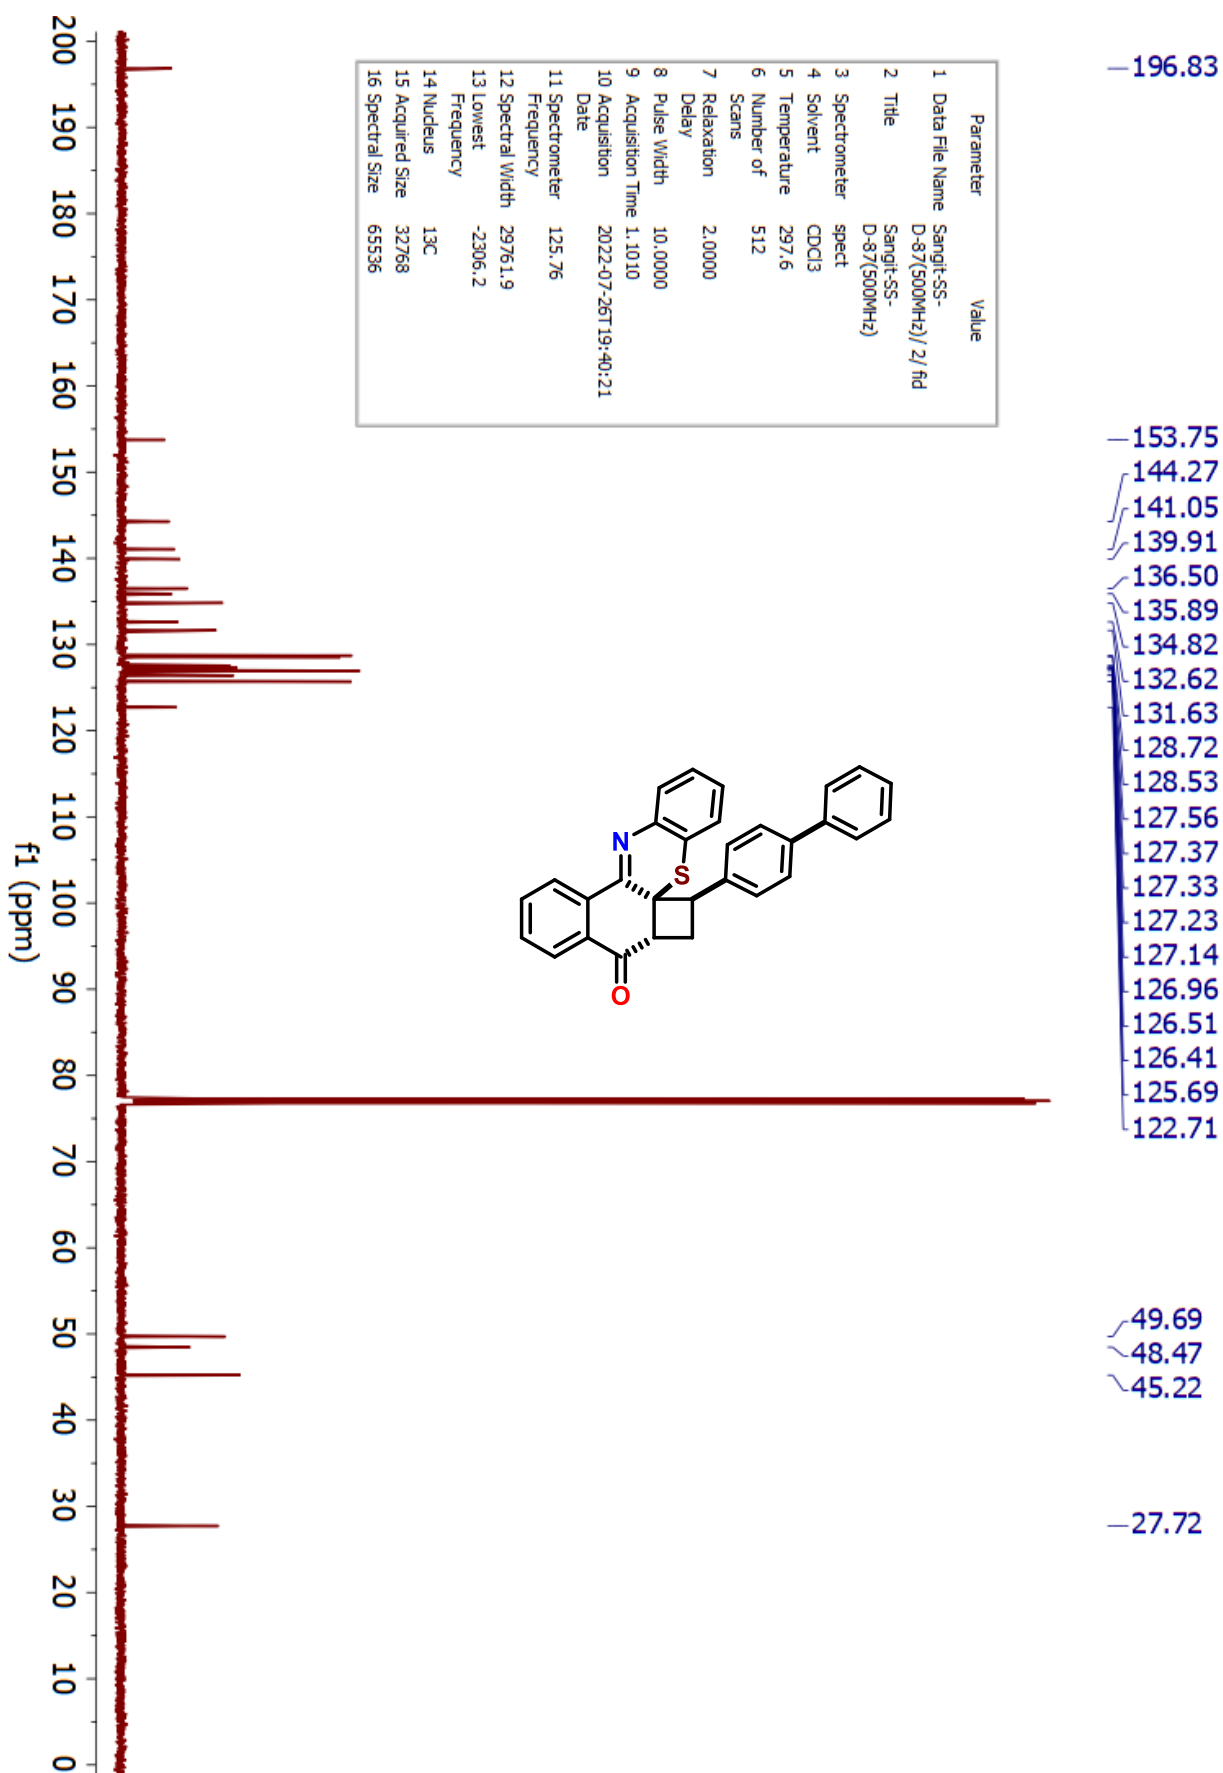





$^{13}\text{C}\{^1\text{H}\}$  NMR spectra of **2u**

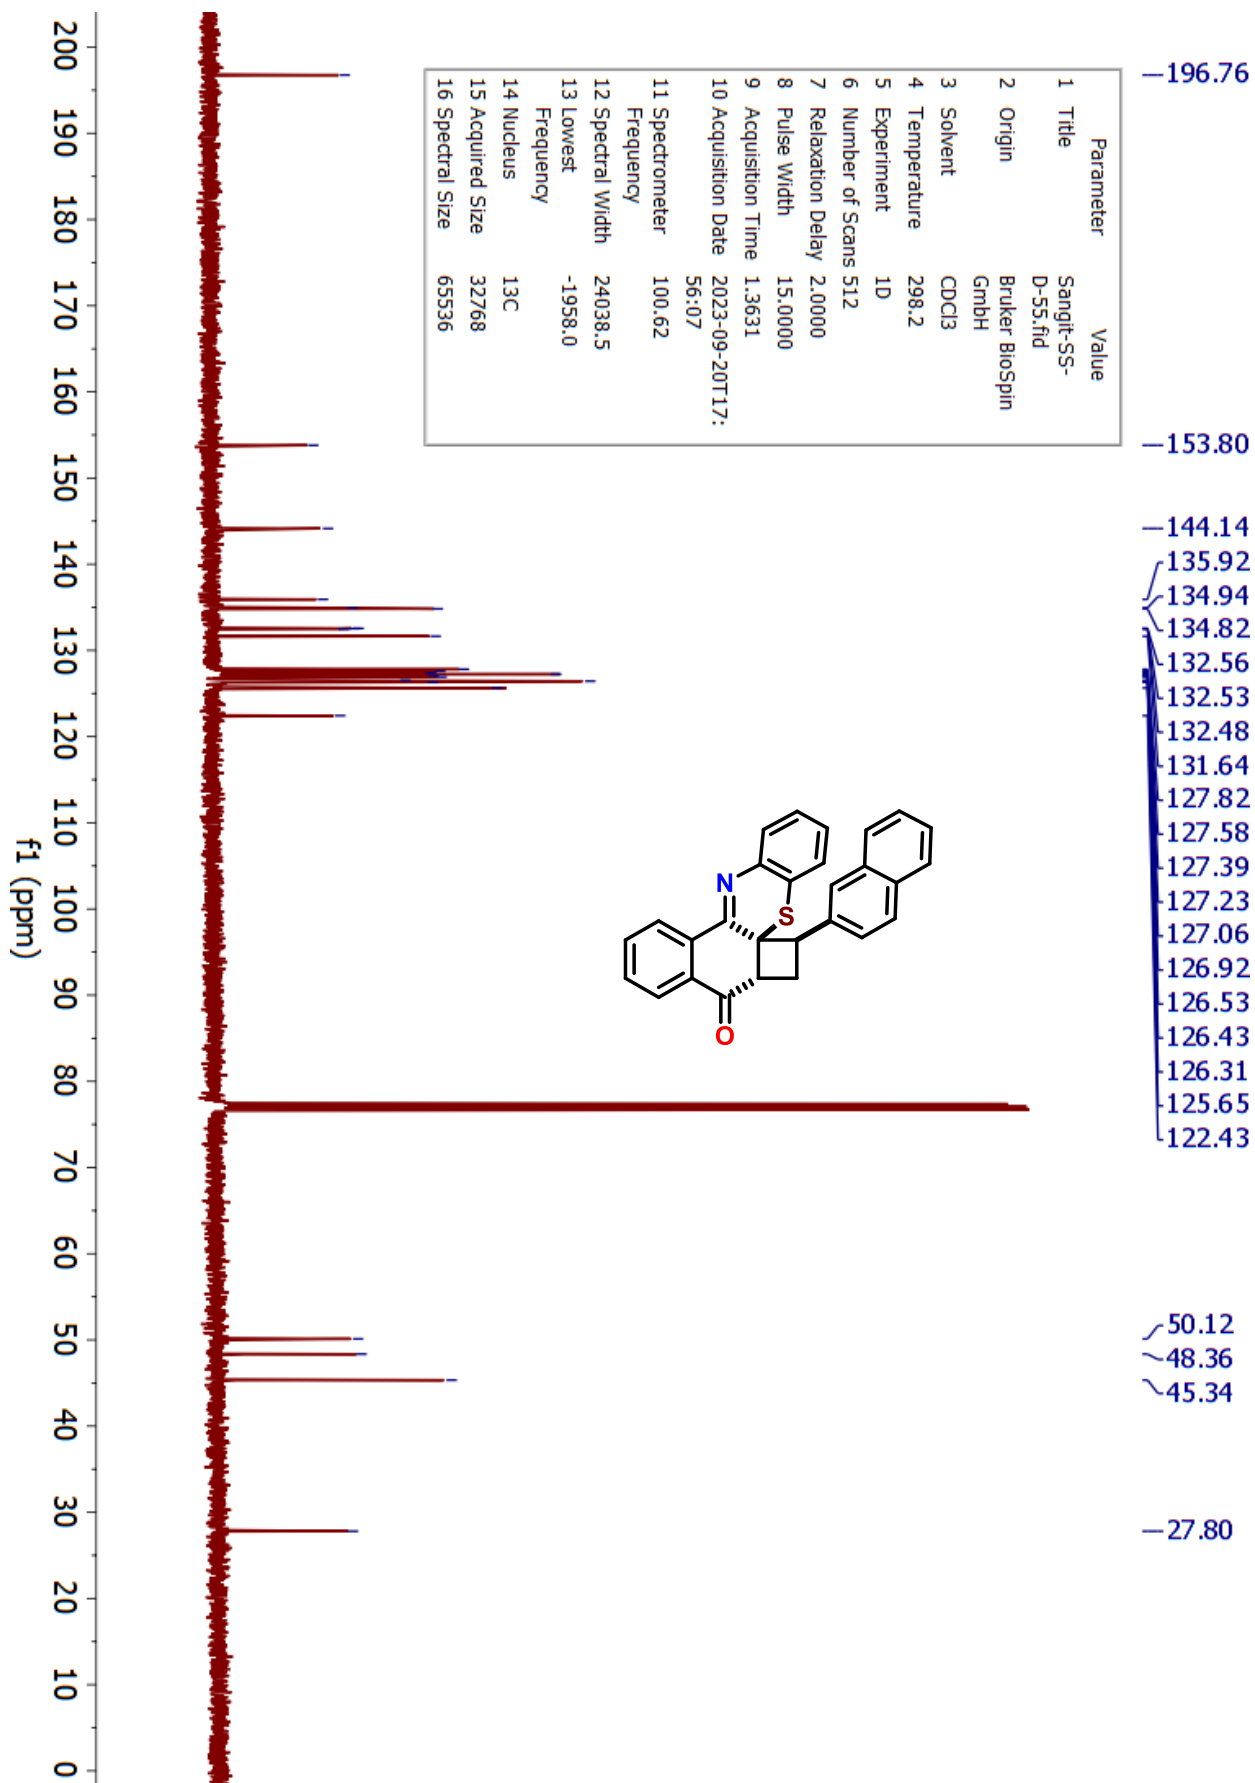

<sup>1</sup>H NMR spectra of **2v**

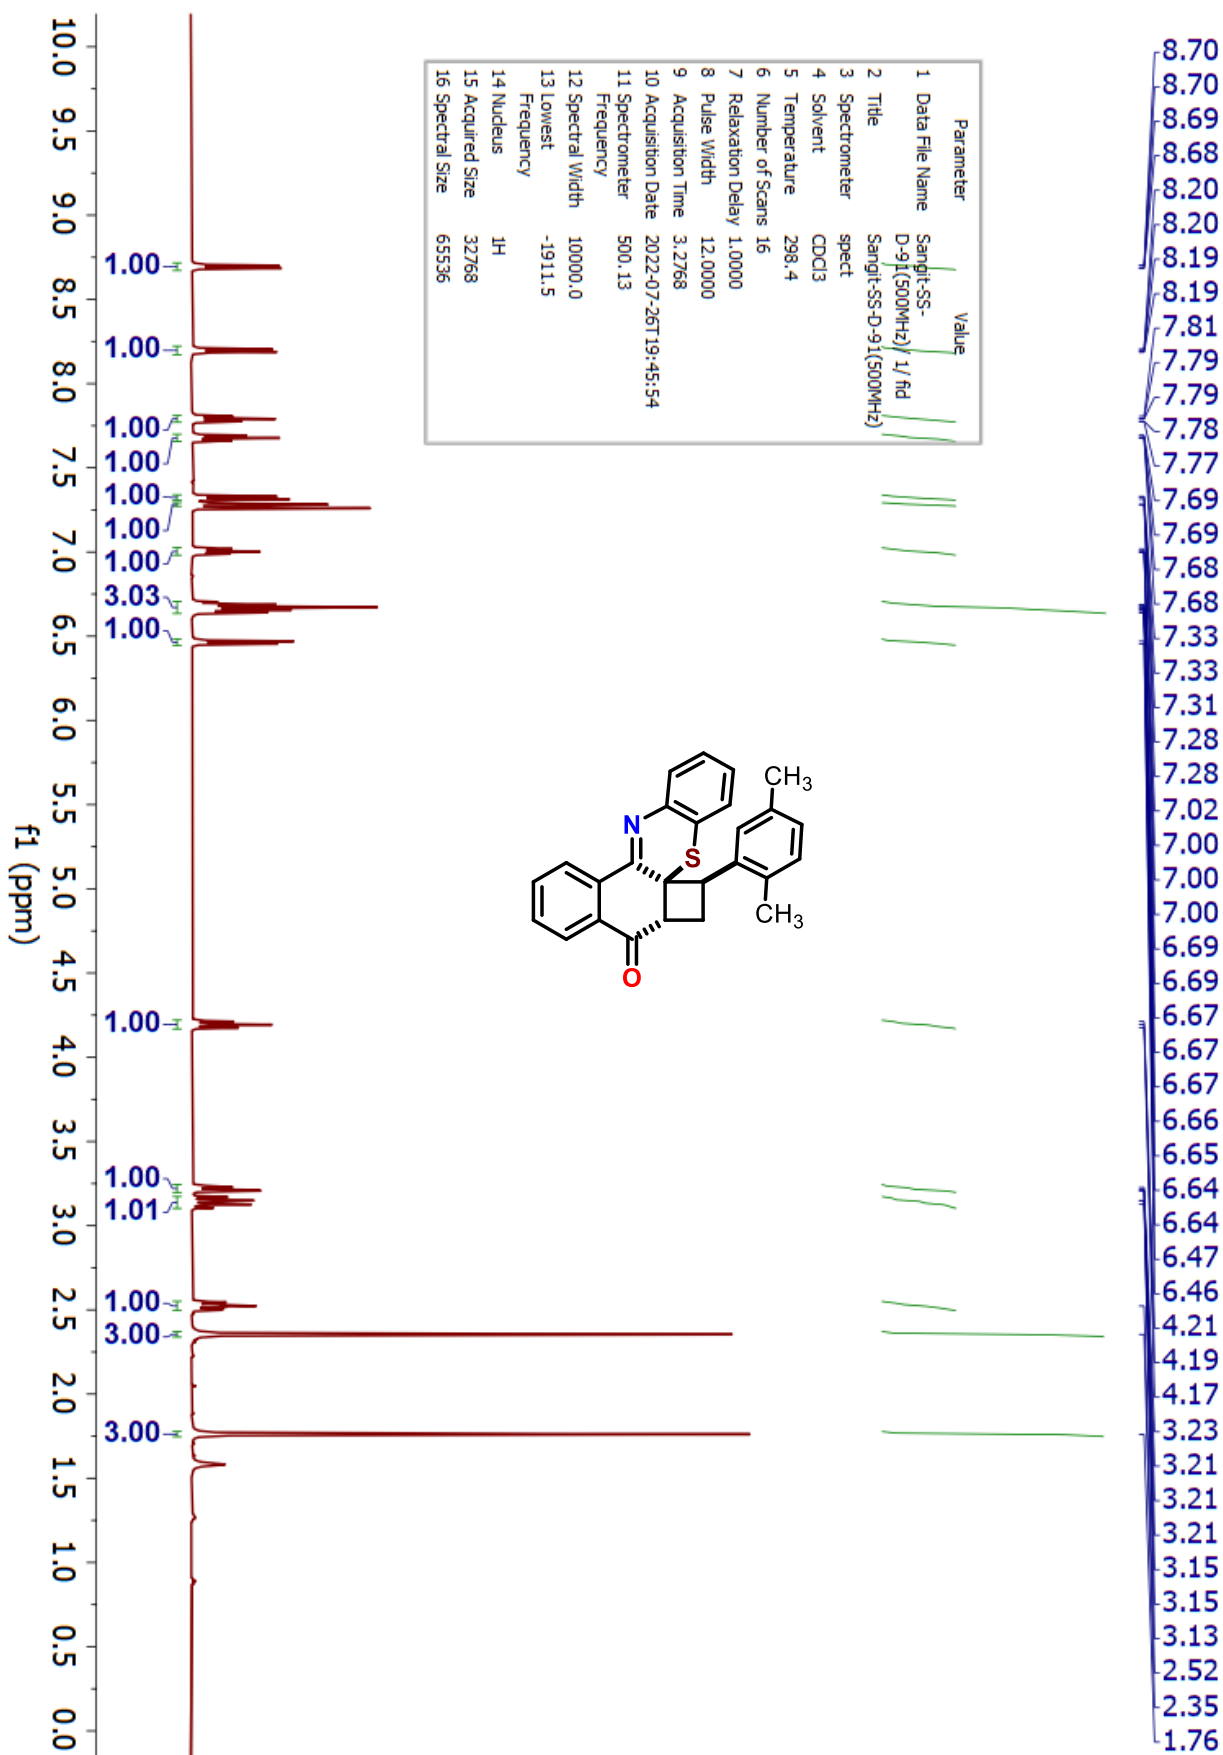

$^{13}\text{C}\{^1\text{H}\}$  NMR spectra of **2v**

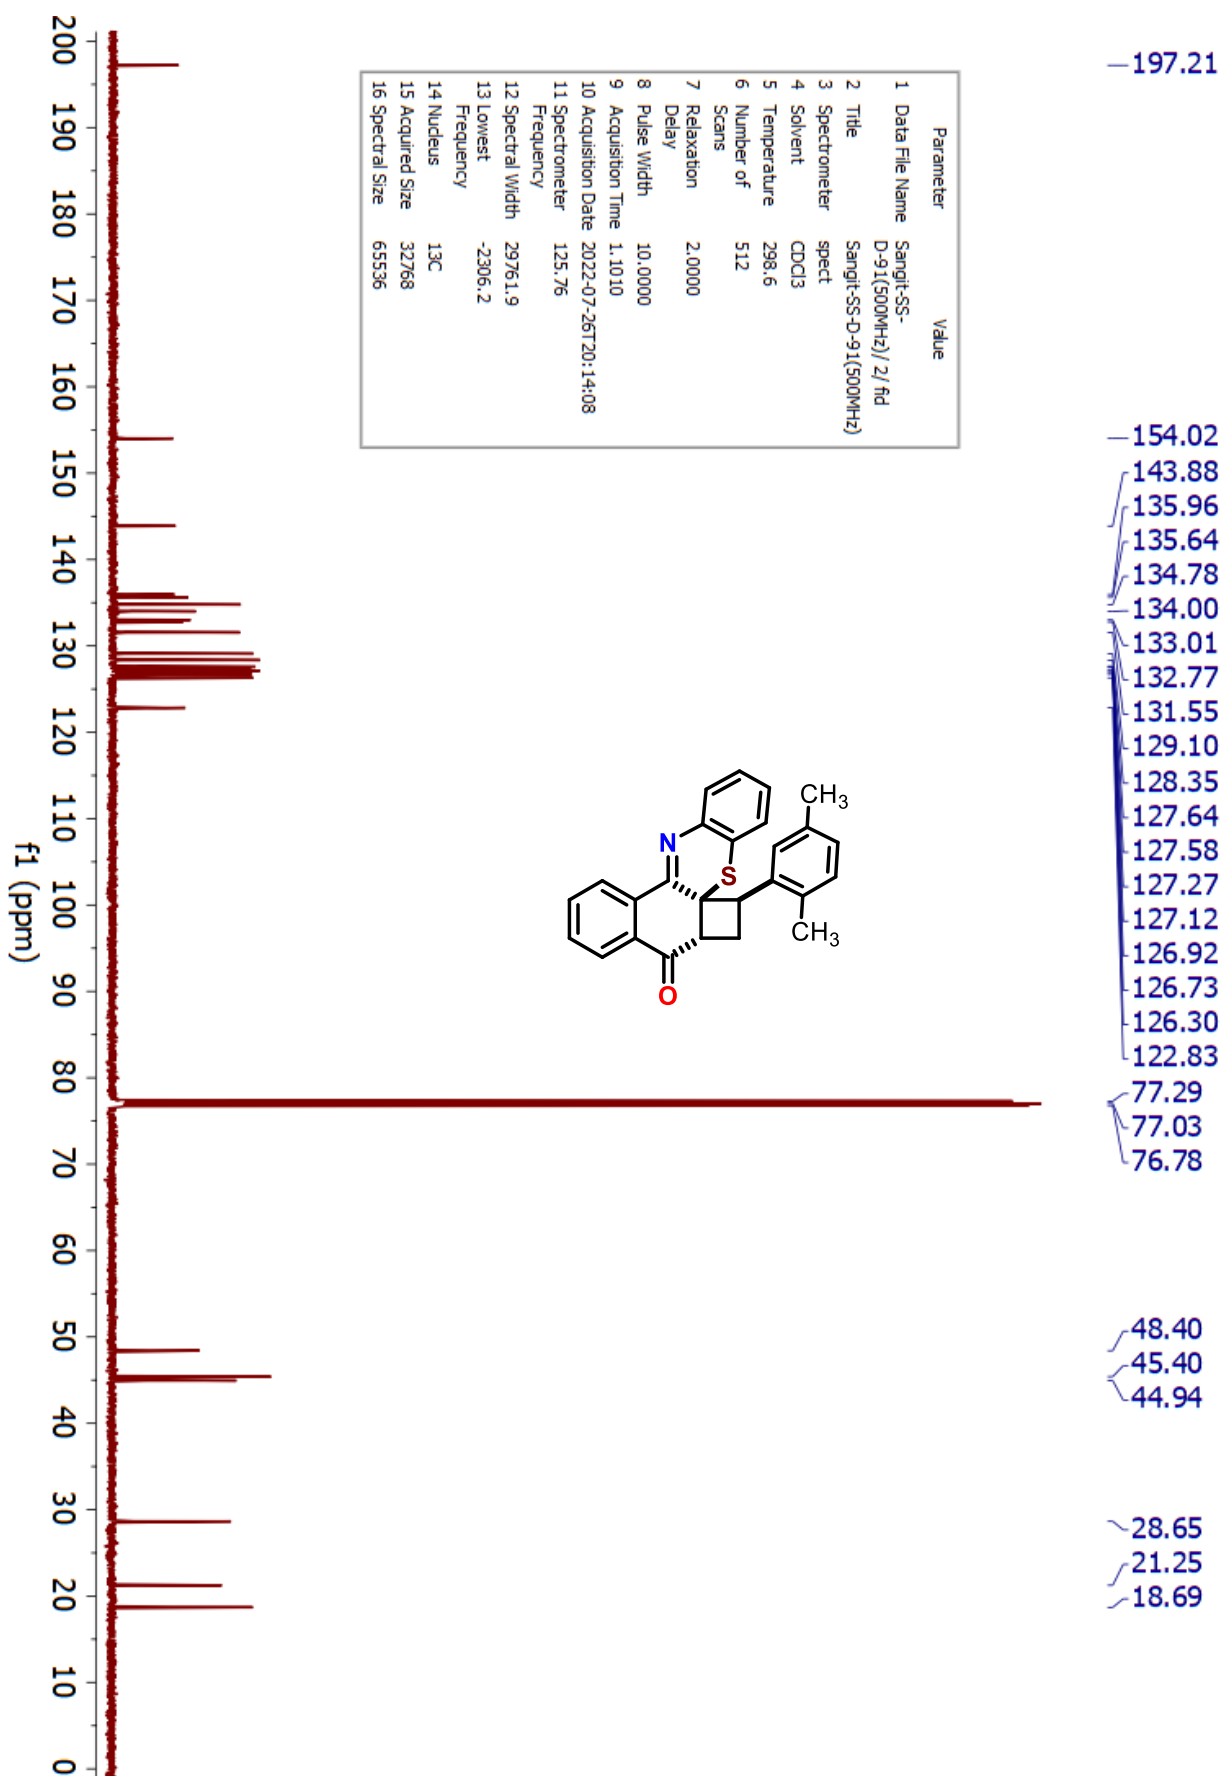

<sup>1</sup>H NMR spectra of **2w**

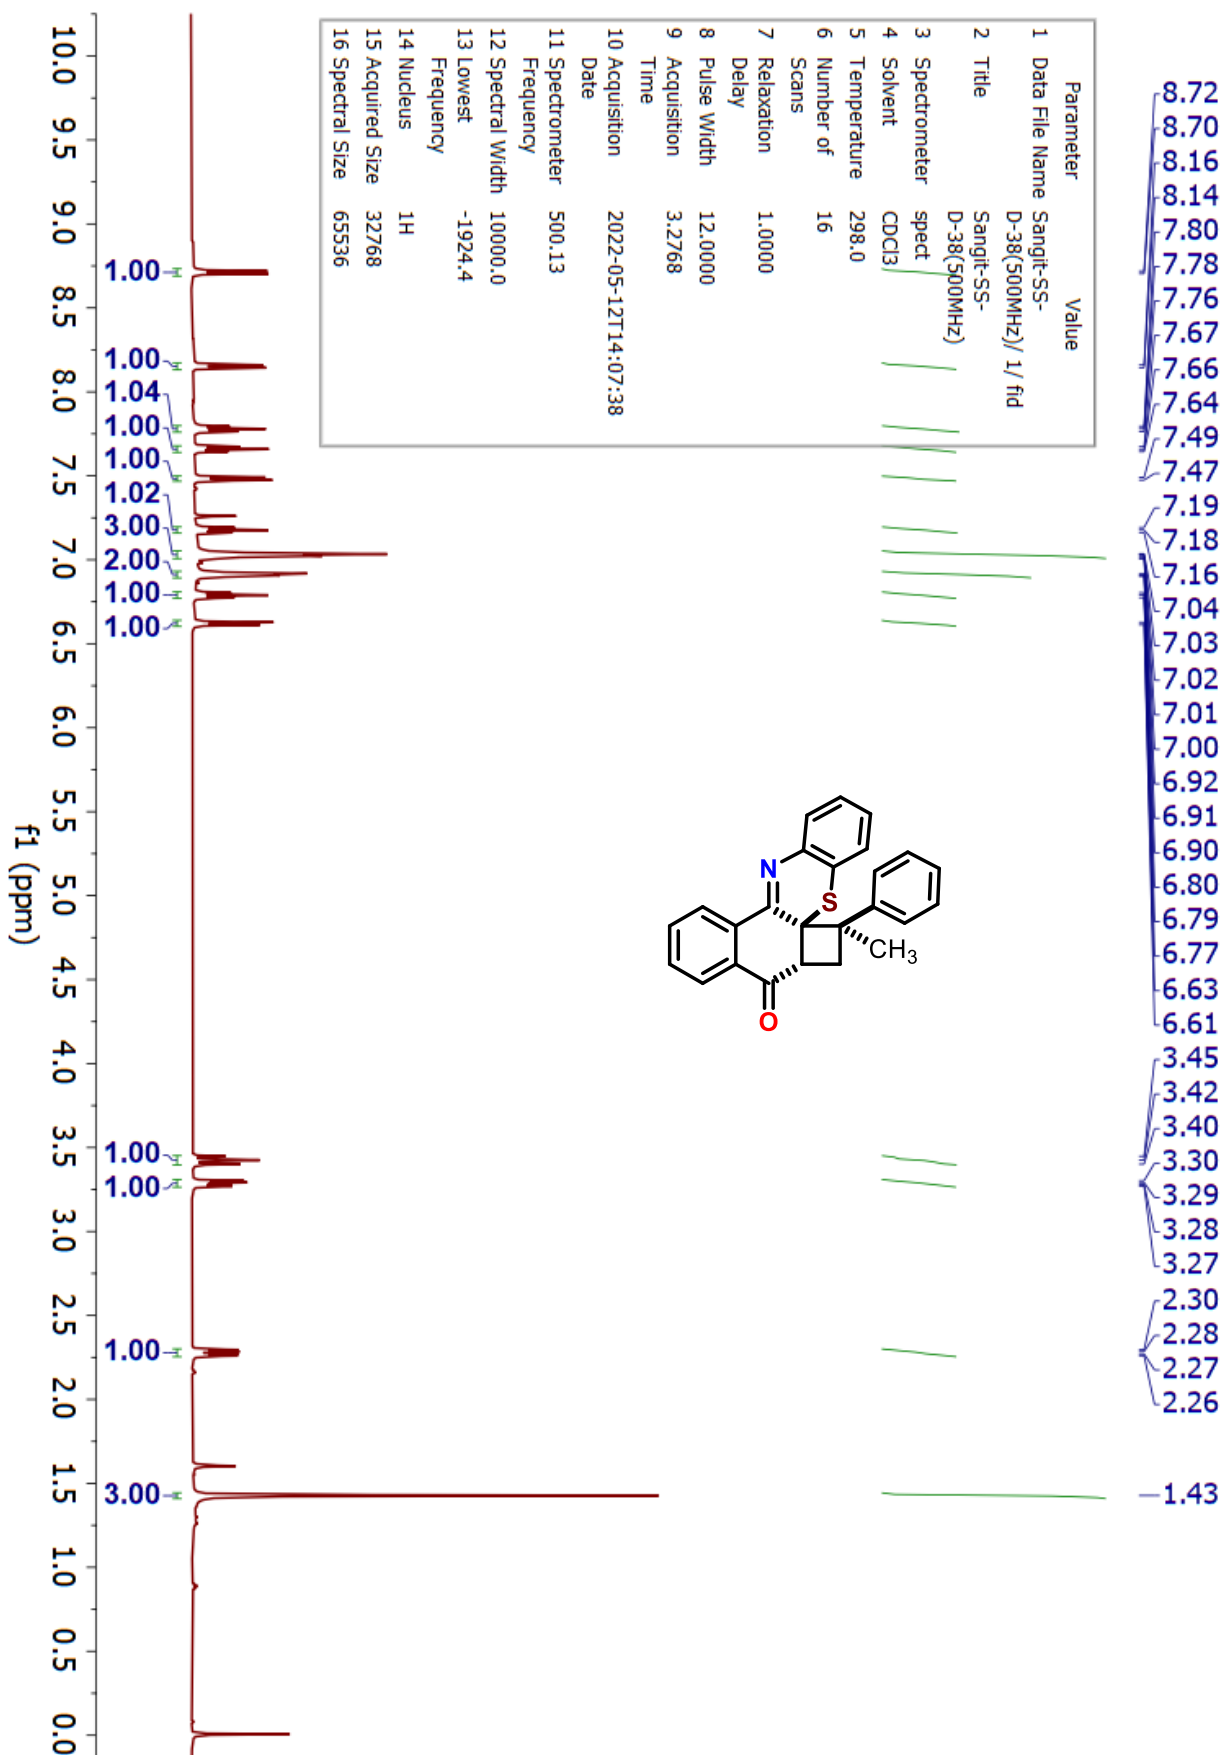

$^{13}\text{C}\{^1\text{H}\}$  NMR spectra of **2w**

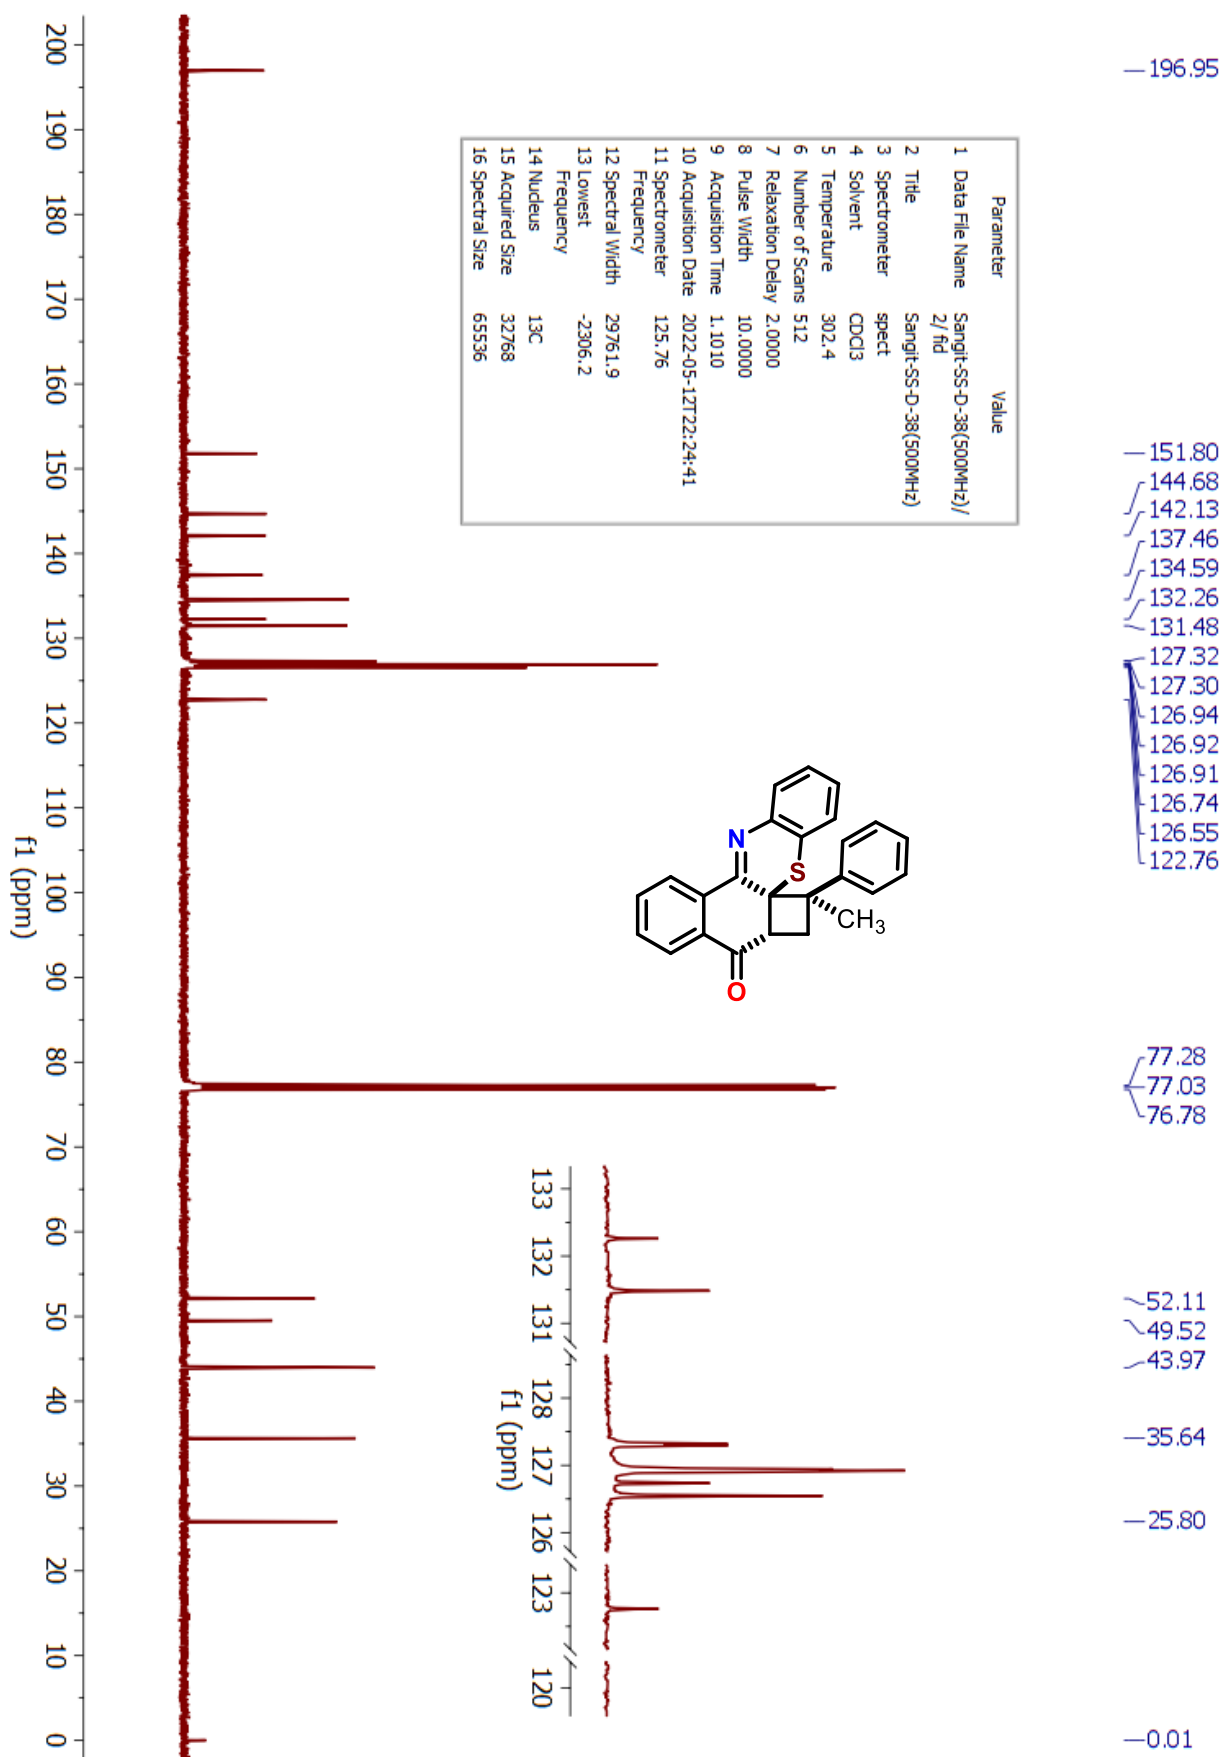

<sup>1</sup>H NMR spectra of **2x**

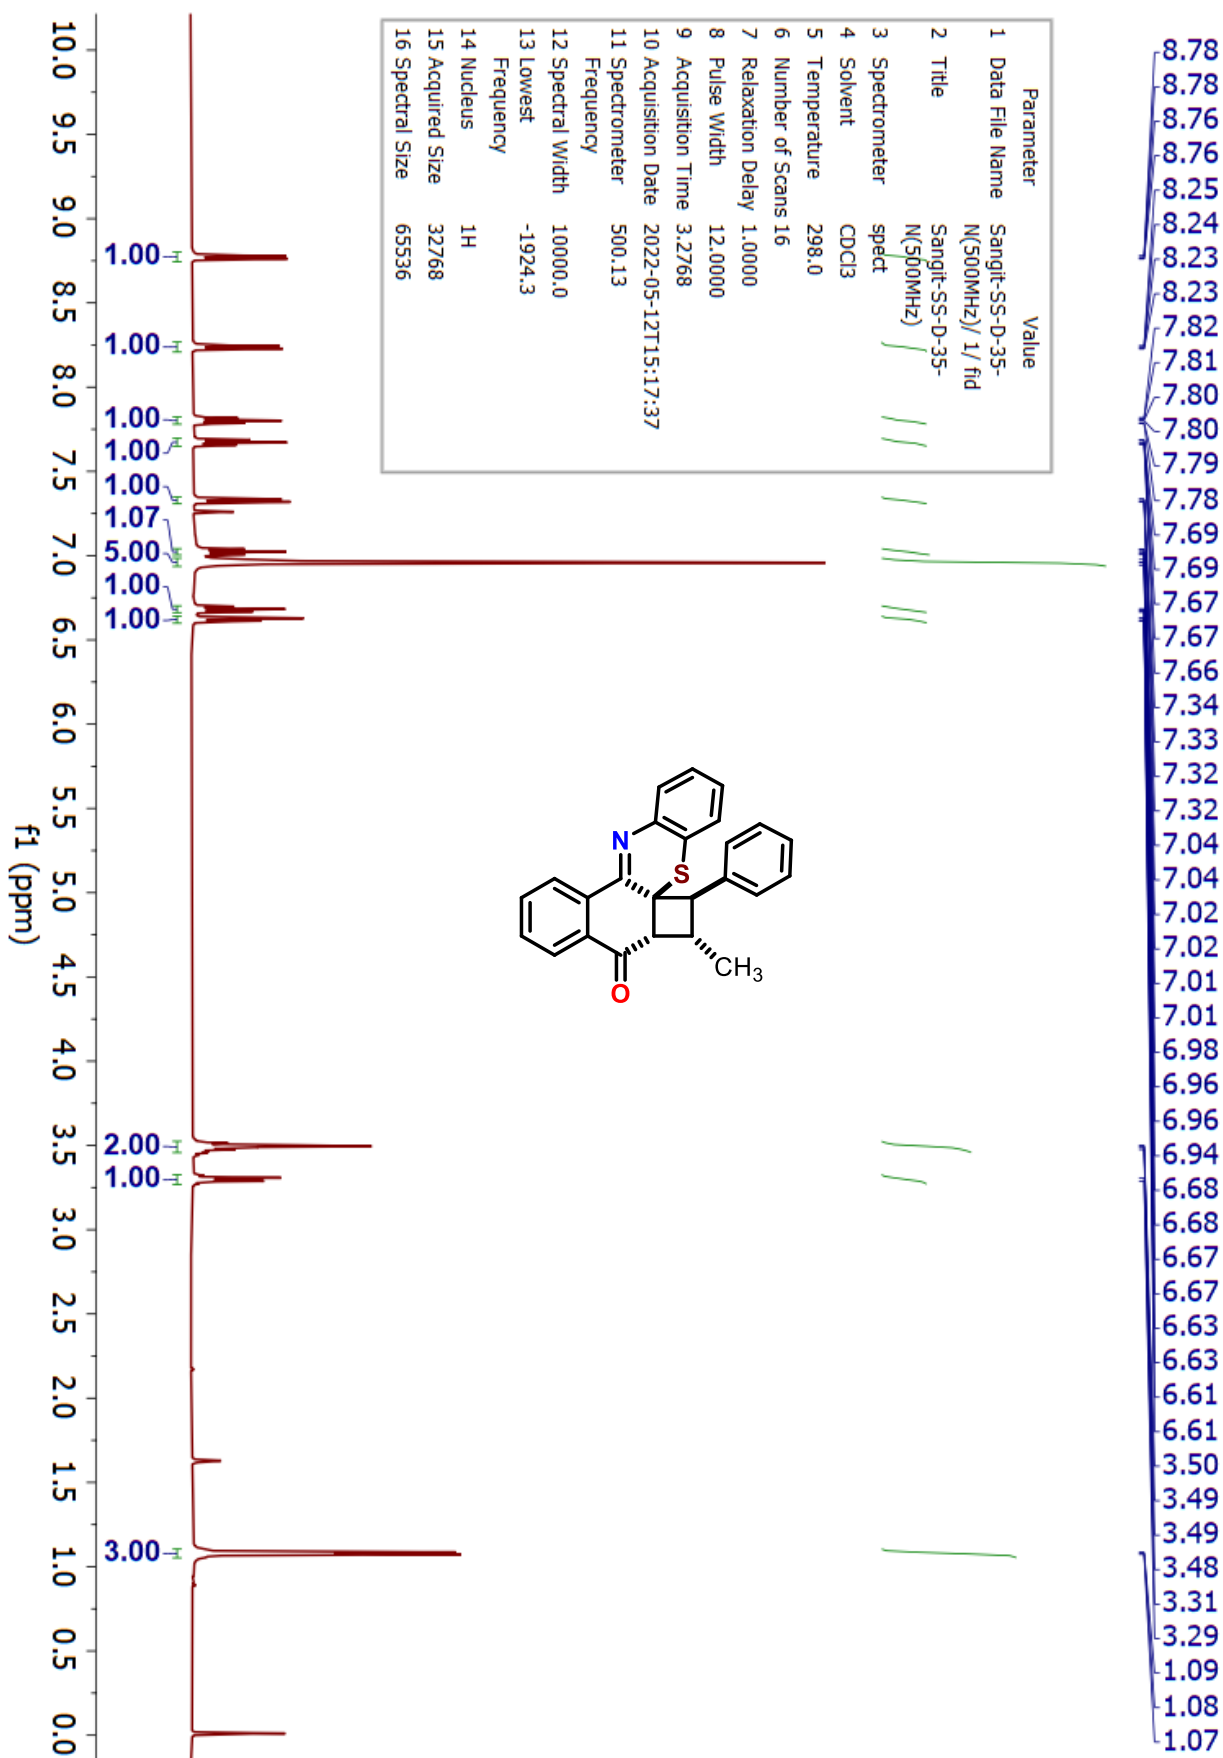

$^{13}\text{C}\{^1\text{H}\}$  NMR spectra of **2x**

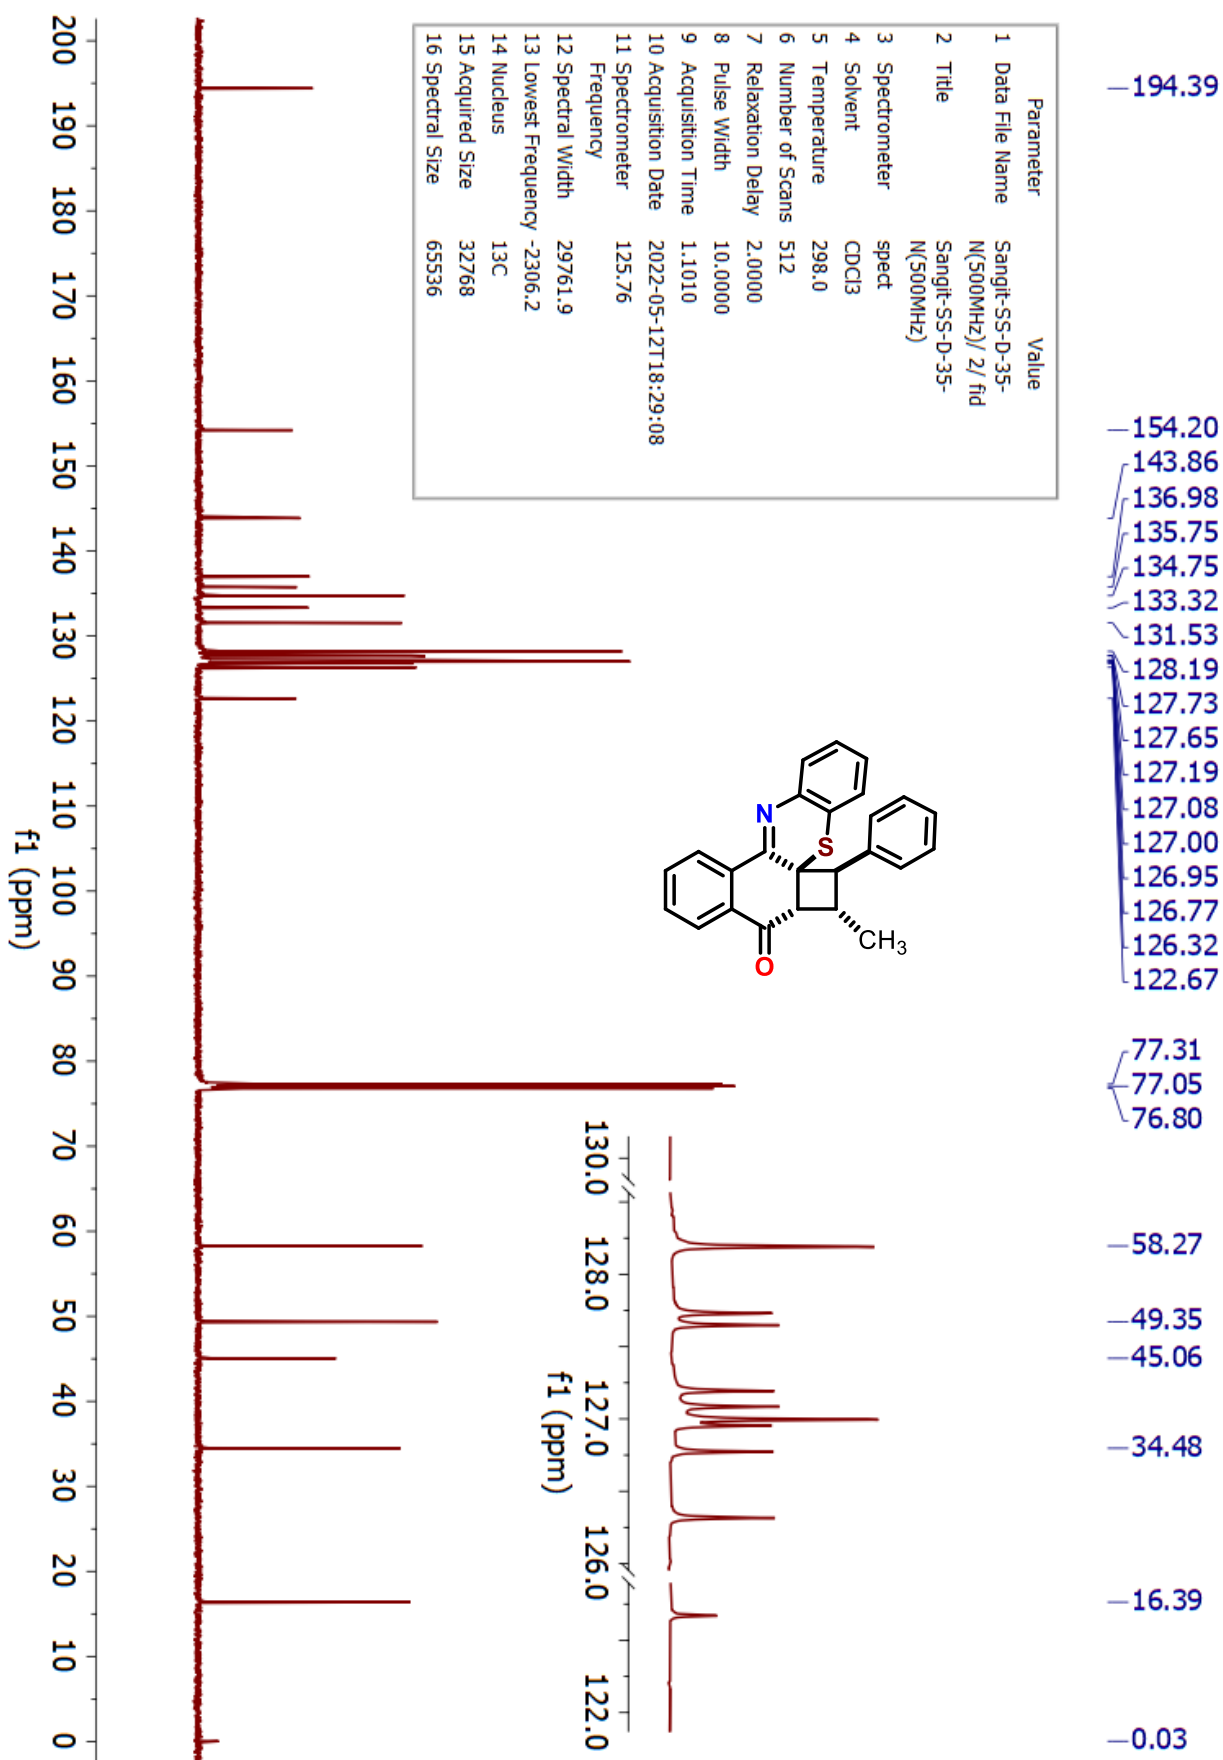

<sup>1</sup>H NMR spectra of **2y**

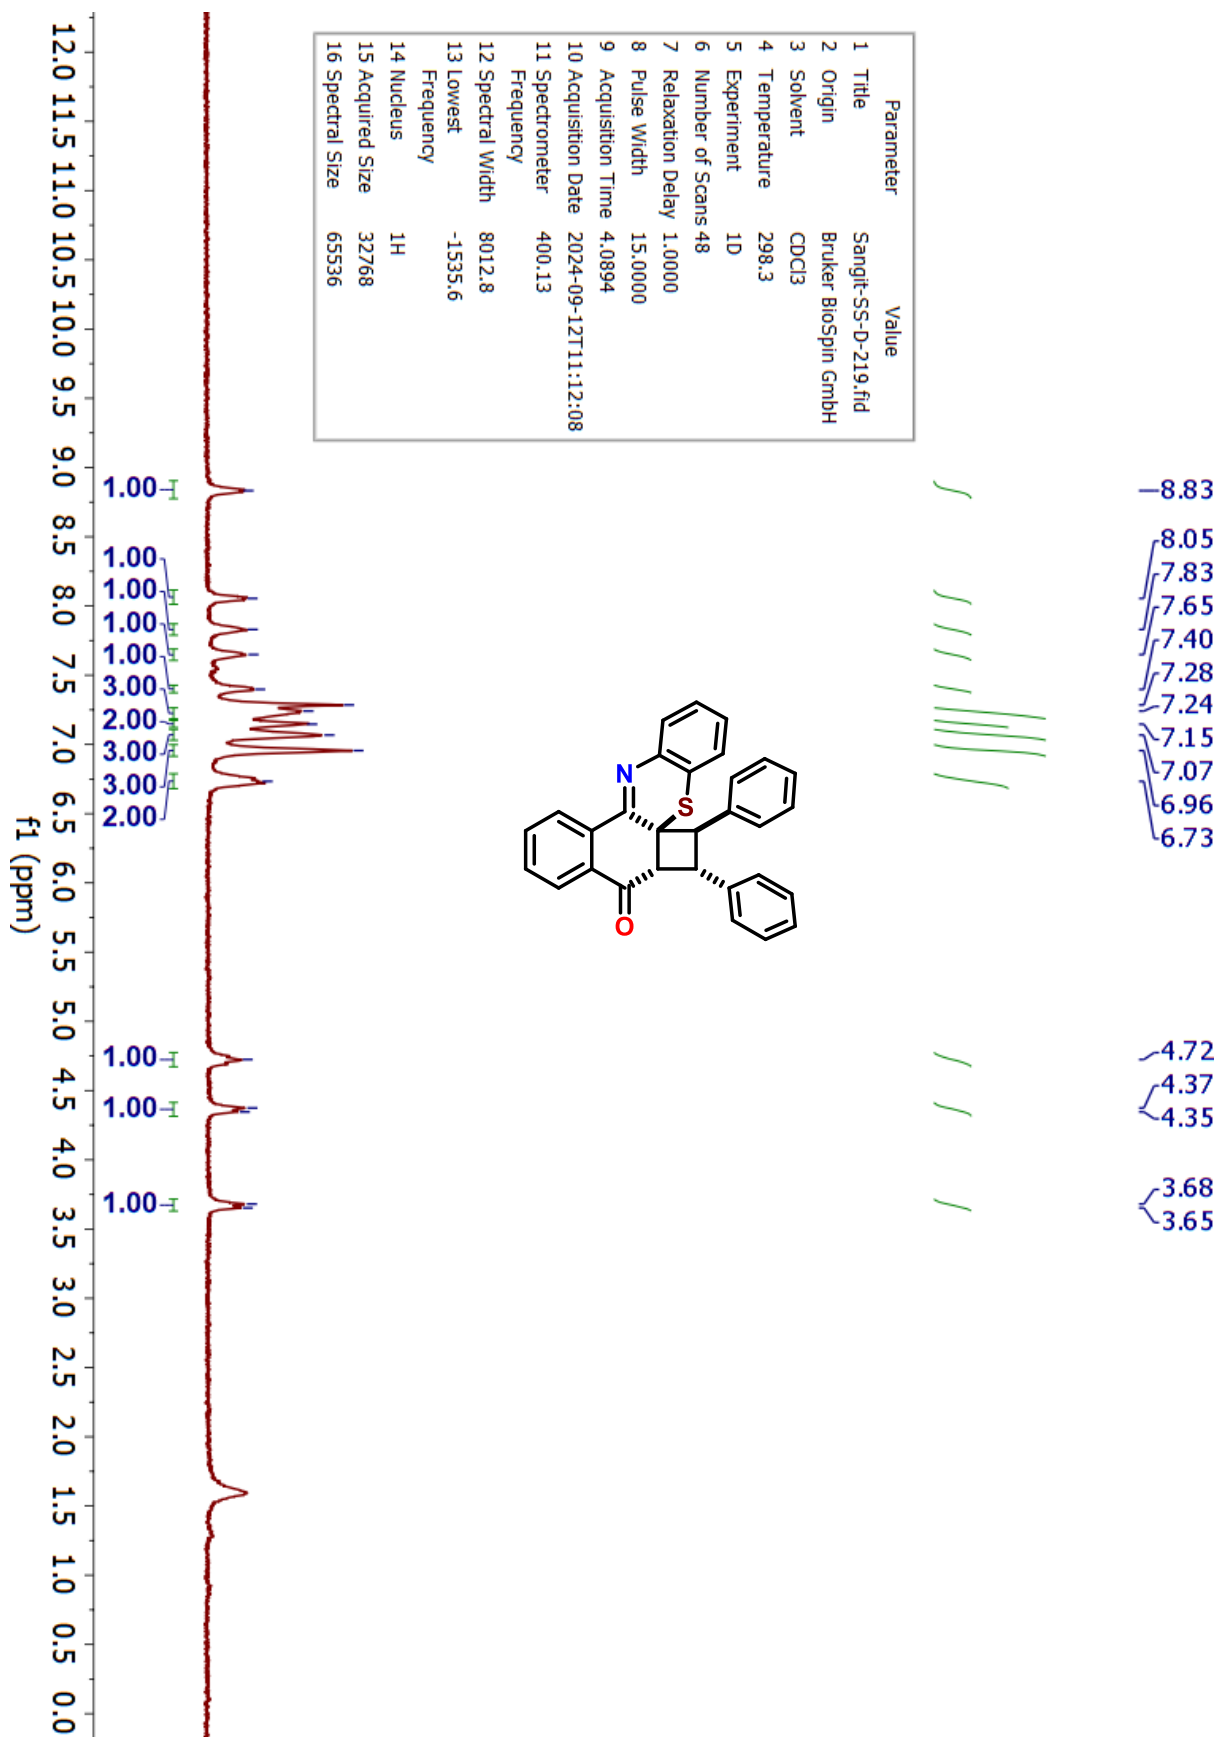



$^{13}\text{C}\{^1\text{H}\}$  NMR spectra of **2y**

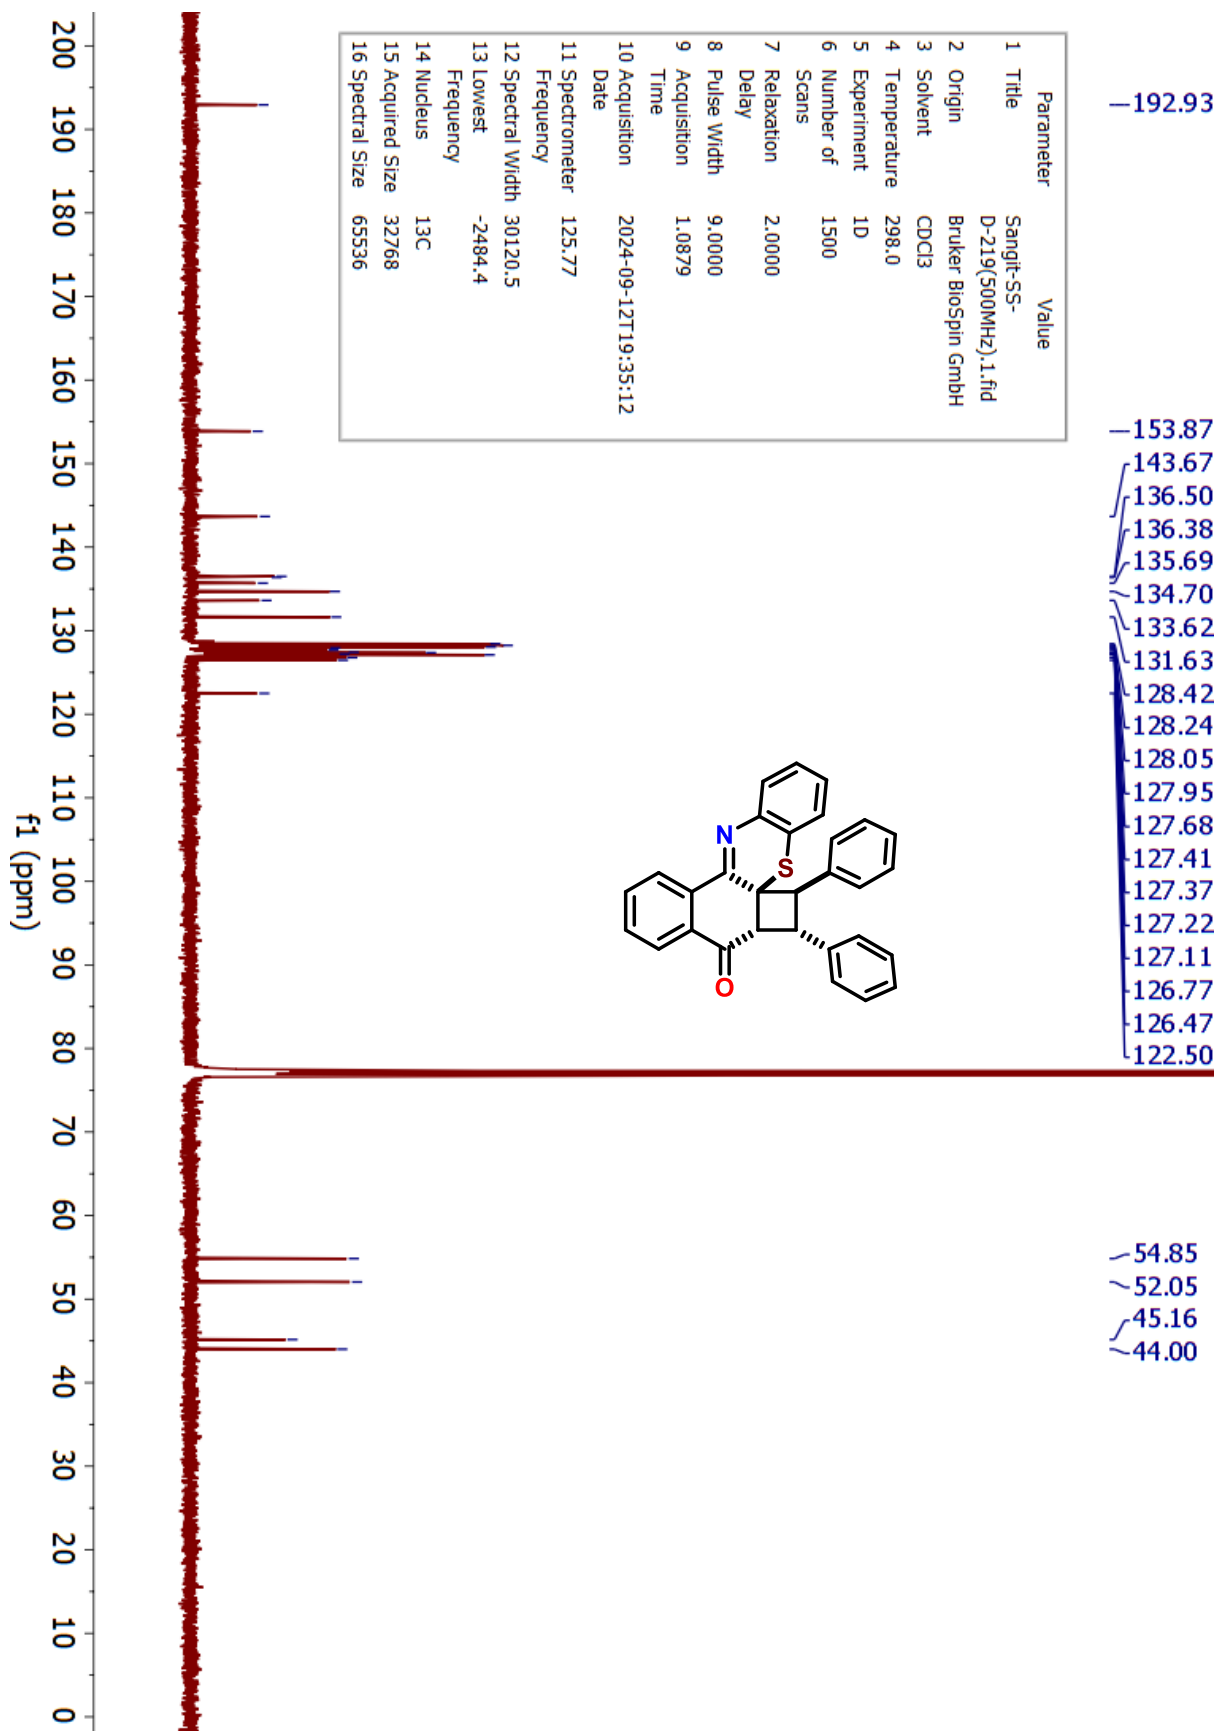

# Mass Spectrum of 2z

## Display Report

### Analysis Info

Analysis Name: D:\Data\USER DATA 2024\Sept-2024\09-sept-24\Prof.S.Kumar-SS-D-218\_1-A,8\_01\_5258.d  
 Method: HRLCMS-20 APR23.m  
 Sample Name: Prof.S.Kumar-SS-D-218  
 Comment:

Acquisition Date: 09-09-2024 14:35:05  
 Operator: Bruker  
 Instrument: micrOTOF-Q 10330

### Acquisition Parameter

|             |          |                       |           |                  |           |
|-------------|----------|-----------------------|-----------|------------------|-----------|
| Source Type | ESI      | Ion Polarity          | Positive  | Set Nebulizer    | 17.4 psi  |
| Focus       | Active   | Set Capillary         | 4500 V    | Set Dry Heater   | 200 °C    |
| Scan Begin  | 50 m/z   | Set End Plate Offset  | -500 V    | Set Dry Gas      | 4.0 l/min |
| Scan End    | 3000 m/z | Set Collision Cell RF | 130.0 Vpp | Set Divert Valve | Waste     |

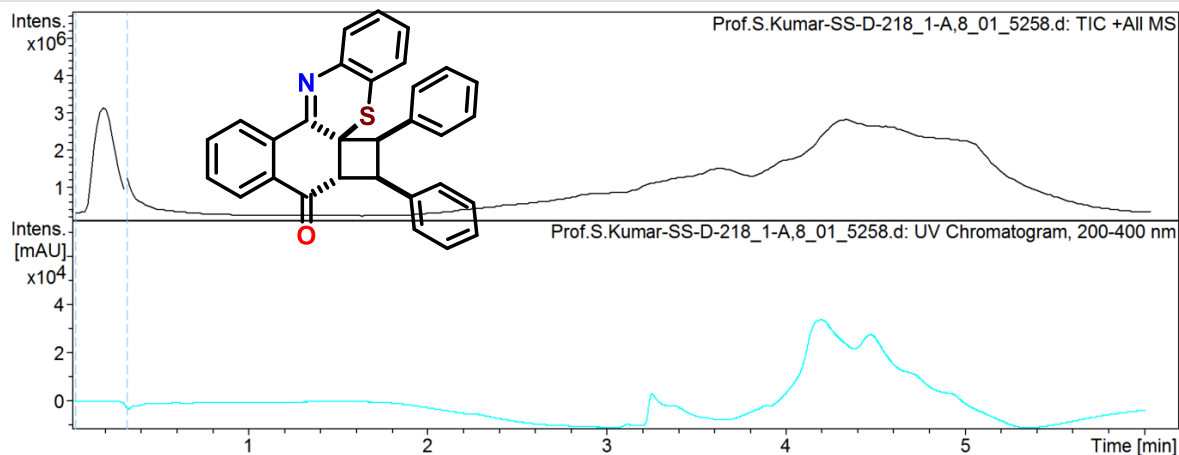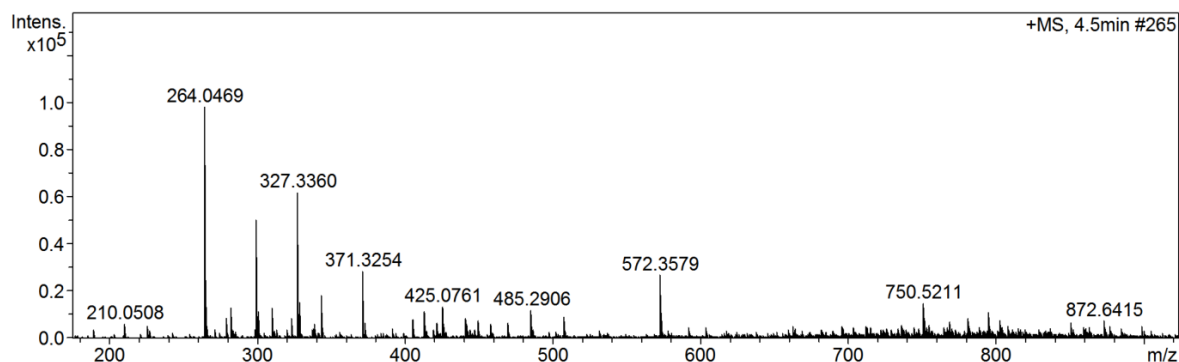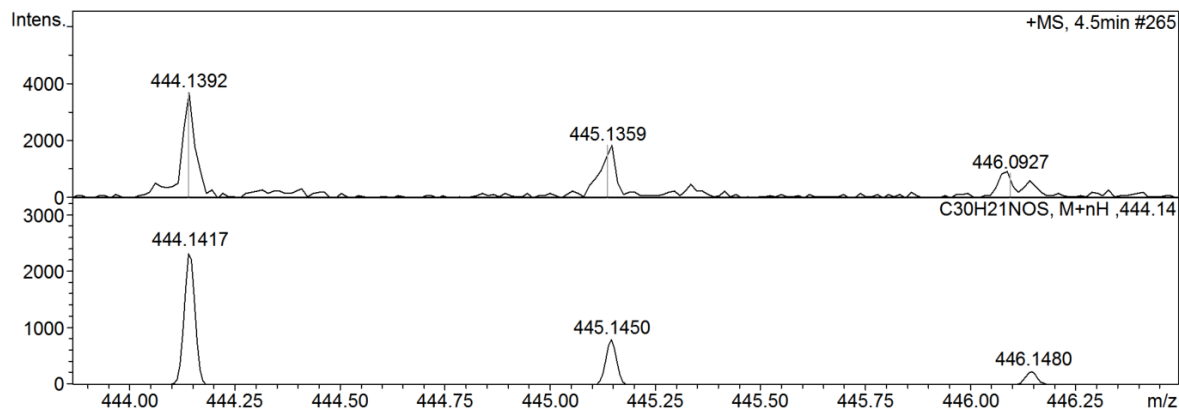

# Mass Spectrum of 2aa

## Display Report

### Analysis Info

Analysis Name D:\Data\USER DATA 2022\JULY2022\19-07-22\Dr.S.Kumar-SS\_D\_75.d  
 Method tune\_wide.m  
 Sample Name SS\_D\_75  
 Comment

Acquisition Date 19-07-2022 15:47:42

Operator Bruker  
 Instrument micrOTOF-Q 10330

### Acquisition Parameter

|             |            |                       |           |                  |           |
|-------------|------------|-----------------------|-----------|------------------|-----------|
| Source Type | ESI        | Ion Polarity          | Positive  | Set Nebulizer    | 0.4 Bar   |
| Focus       | Not active | Set Capillary         | 4500 V    | Set Dry Heater   | 180 °C    |
| Scan Begin  | 50 m/z     | Set End Plate Offset  | -500 V    | Set Dry Gas      | 4.0 l/min |
| Scan End    | 3000 m/z   | Set Collision Cell RF | 600.0 Vpp | Set Divert Valve | Source    |

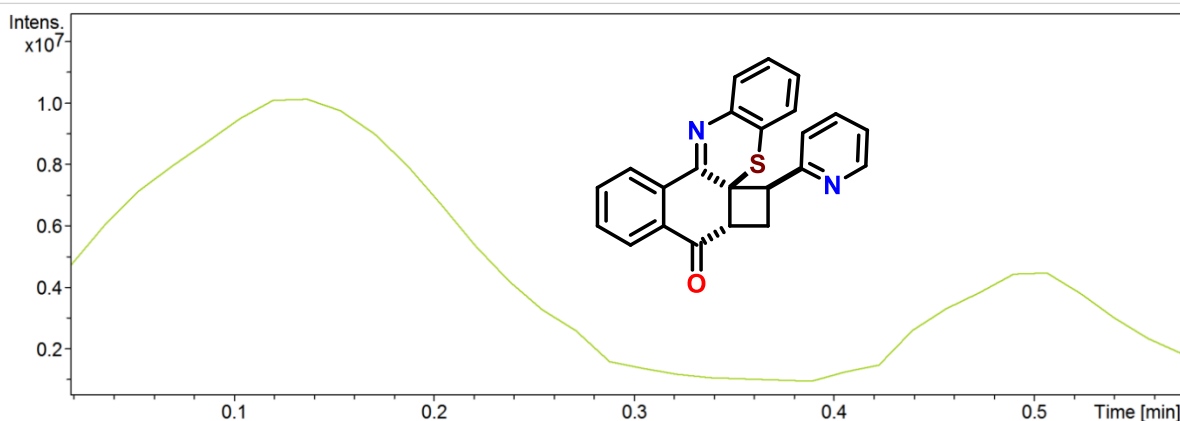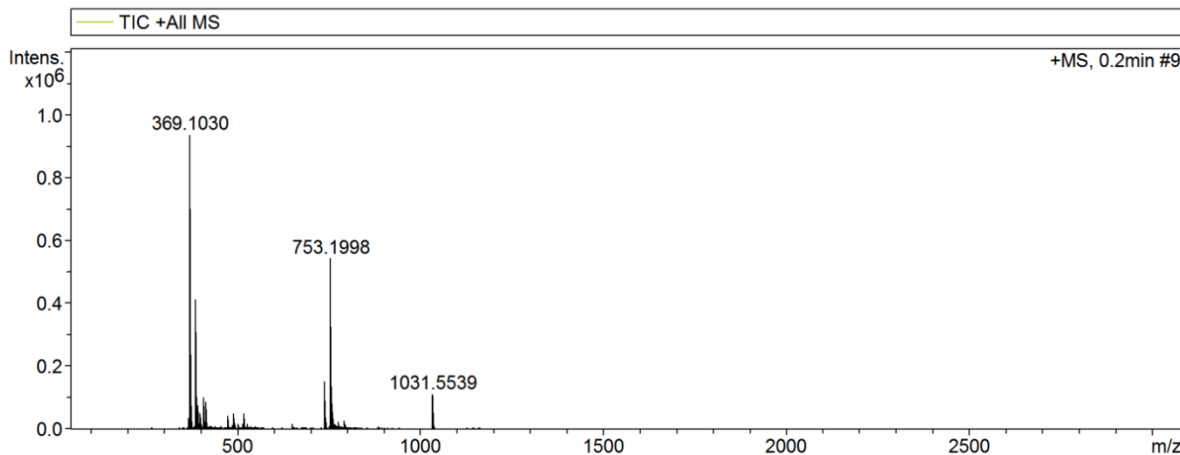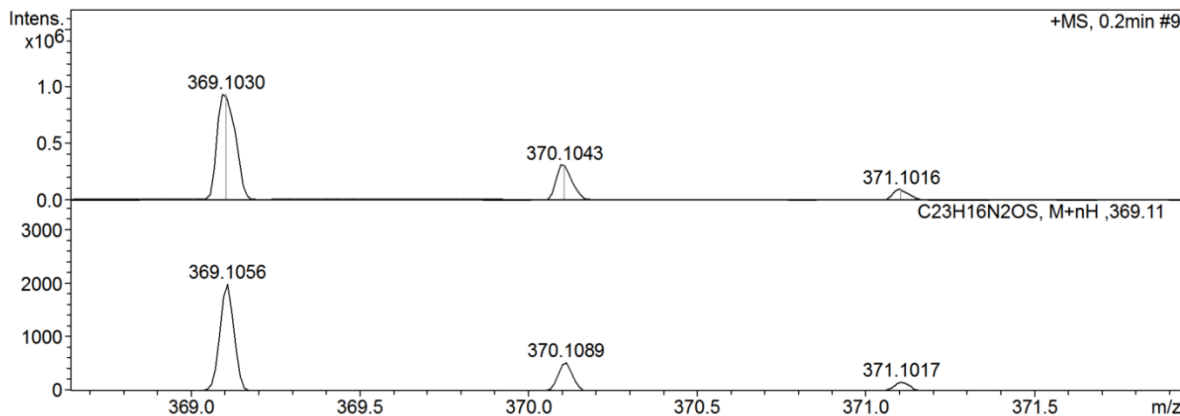

# Mass Spectrum of 2ab

## Display Report

### Analysis Info

Analysis Name D:\Data\USER DATA 2022\JULY2022\18-07-22\Prof.S.Kumar-SS\_D\_70.d  
 Method tune\_wide.m  
 Sample Name SS\_D\_70  
 Comment

Acquisition Date 18-07-2022 14:57:47

Operator Bruker  
 Instrument micrOTOF-Q 10330

### Acquisition Parameter

|             |            |                       |           |                  |           |
|-------------|------------|-----------------------|-----------|------------------|-----------|
| Source Type | ESI        | Ion Polarity          | Positive  | Set Nebulizer    | 0.4 Bar   |
| Focus       | Not active | Set Capillary         | 4500 V    | Set Dry Heater   | 180 °C    |
| Scan Begin  | 50 m/z     | Set End Plate Offset  | -500 V    | Set Dry Gas      | 4.0 l/min |
| Scan End    | 3000 m/z   | Set Collision Cell RF | 600.0 Vpp | Set Divert Valve | Source    |

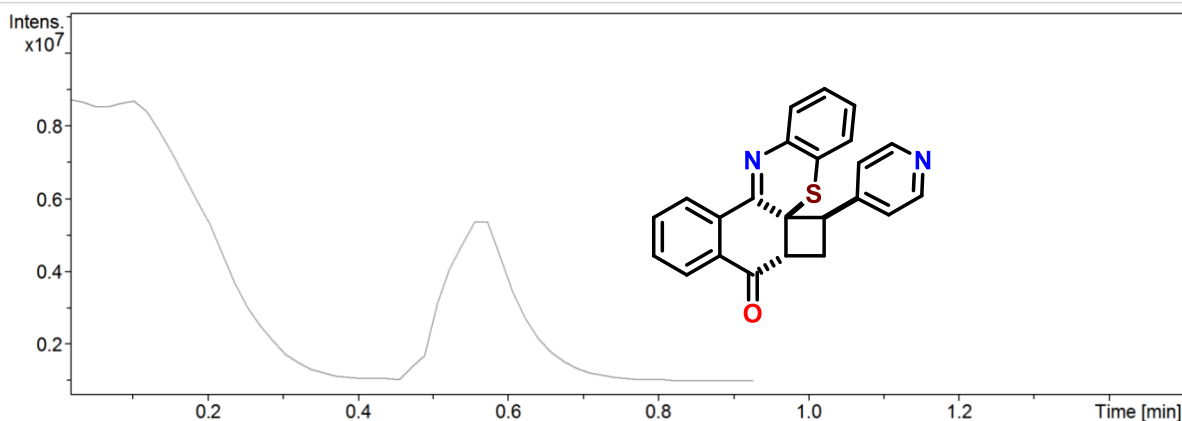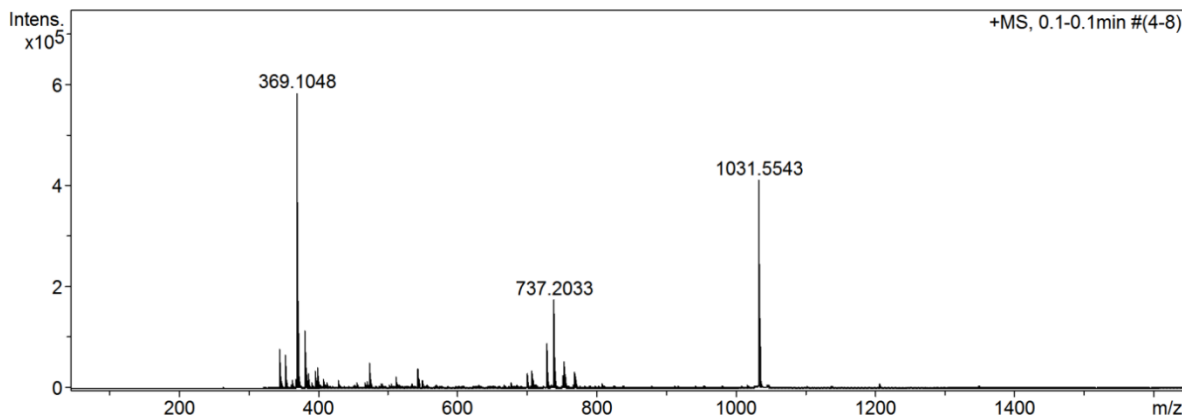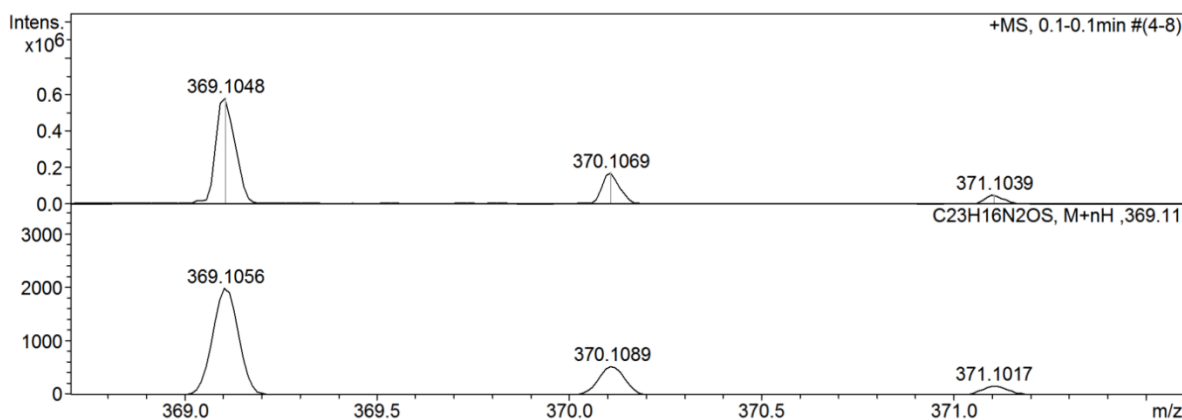

<sup>1</sup>H NMR spectra of **2ac**

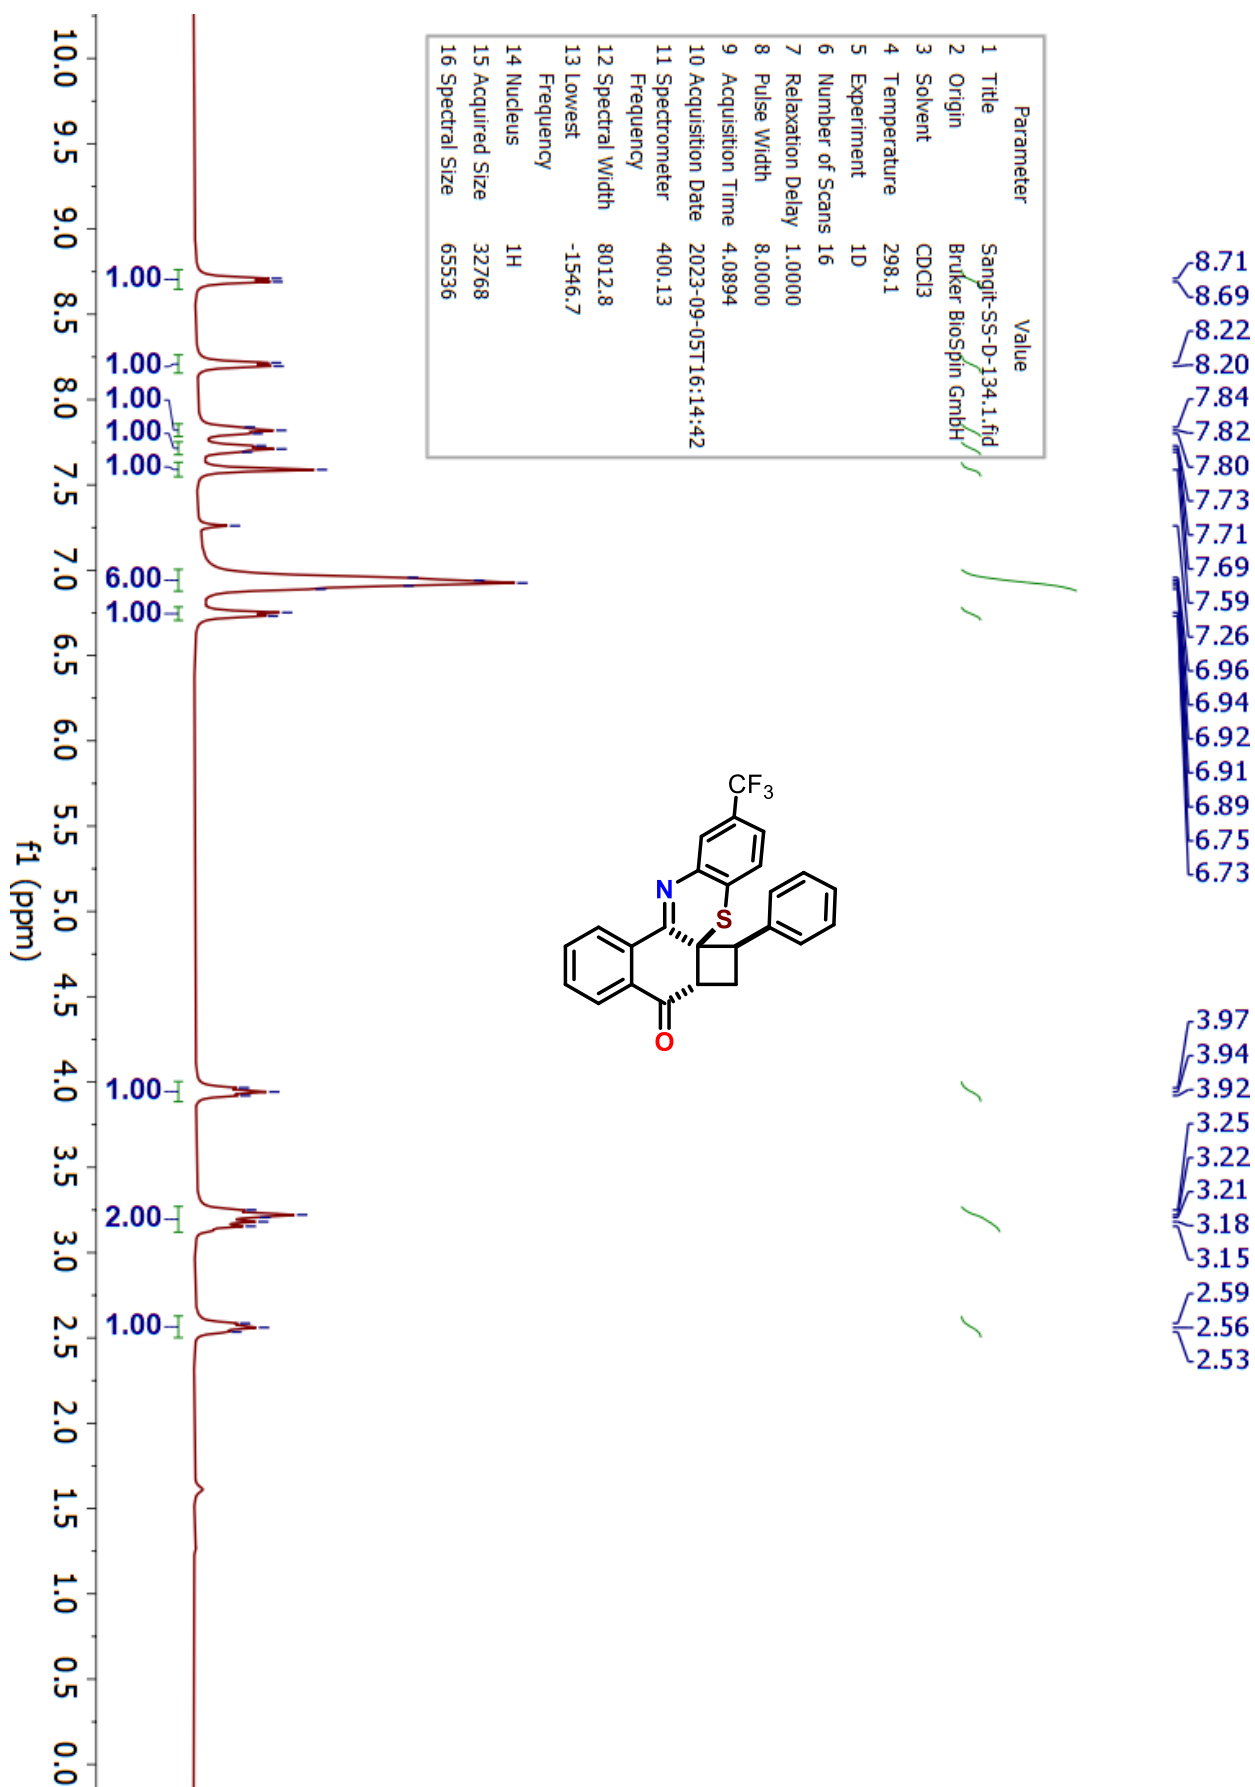

$^{13}\text{C}\{^1\text{H}\}$  NMR spectra of **2ac**

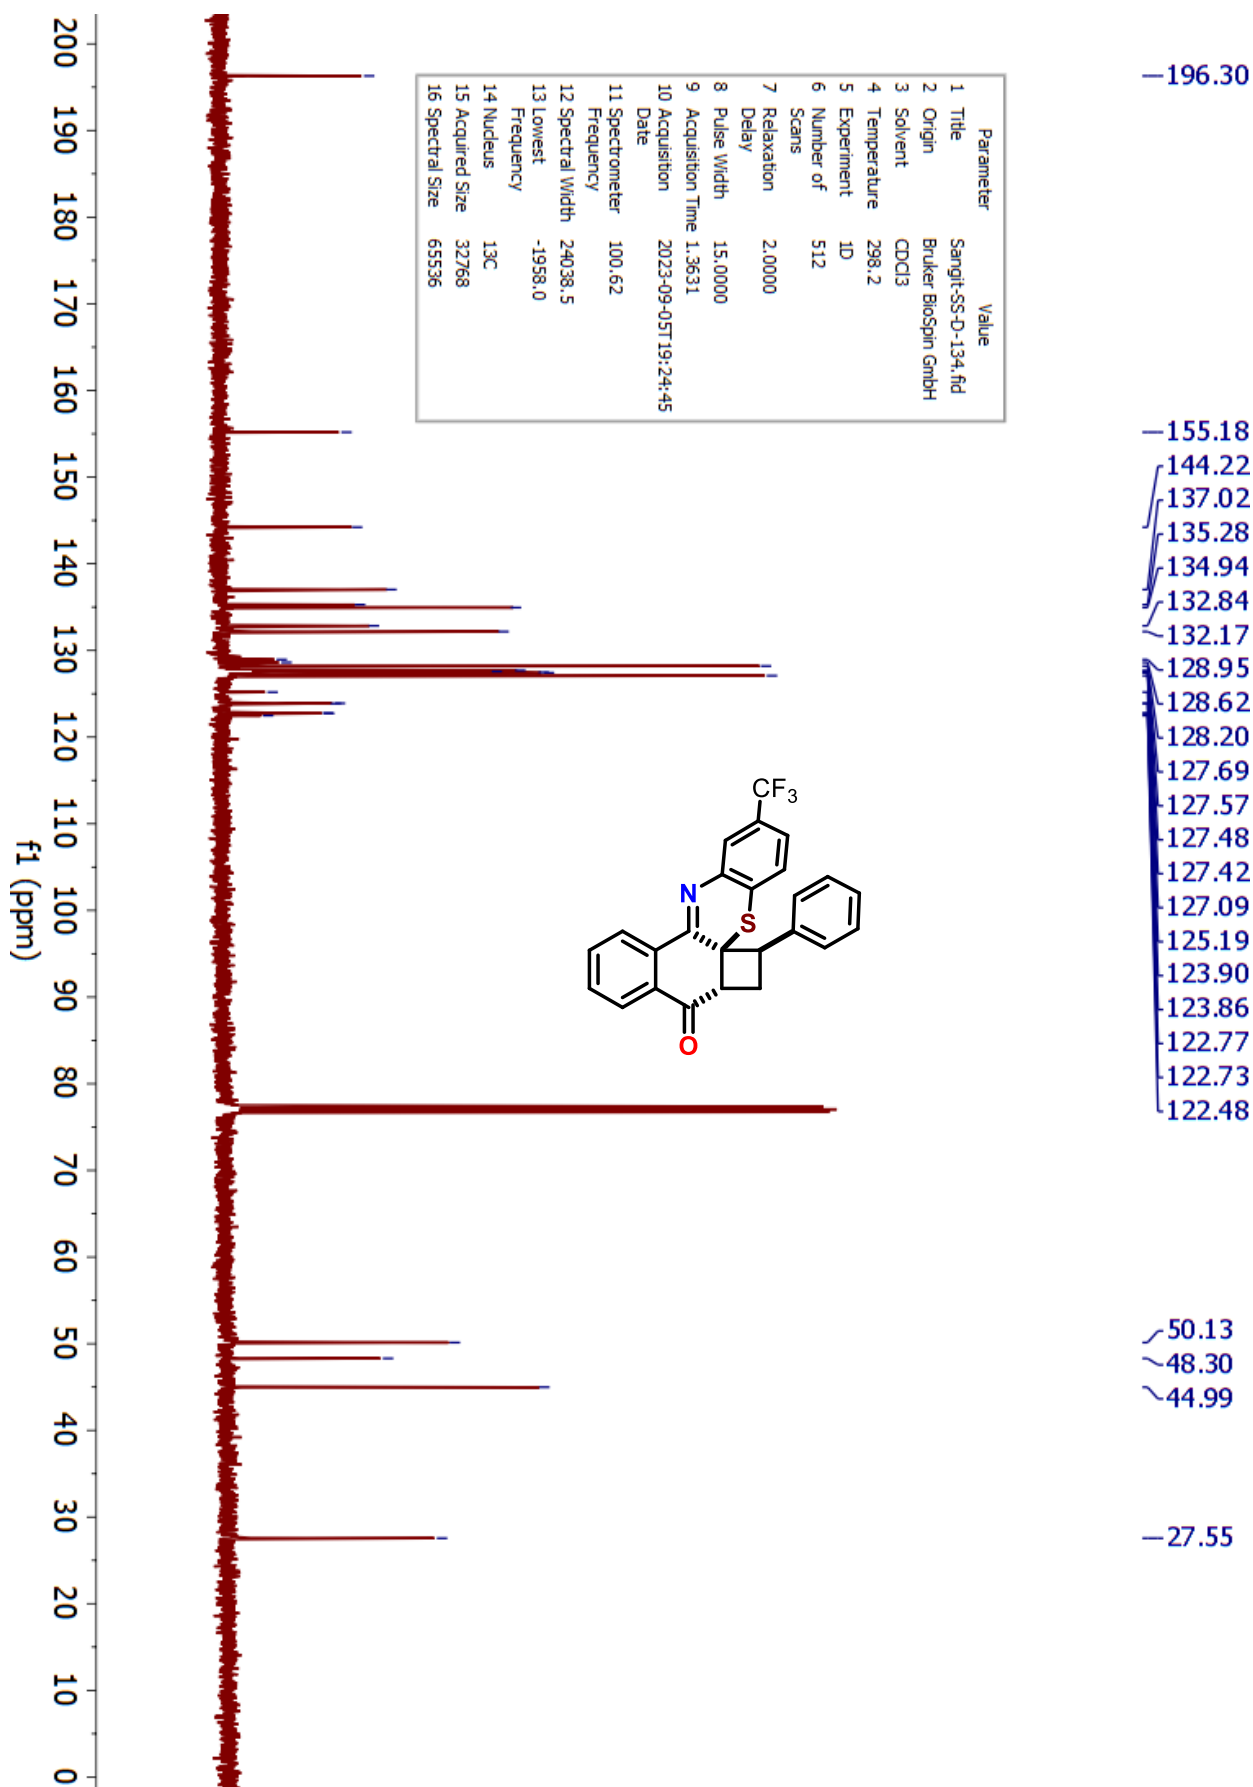

$^{19}\text{F}\{^1\text{H}\}$  NMR spectra of **2ac**

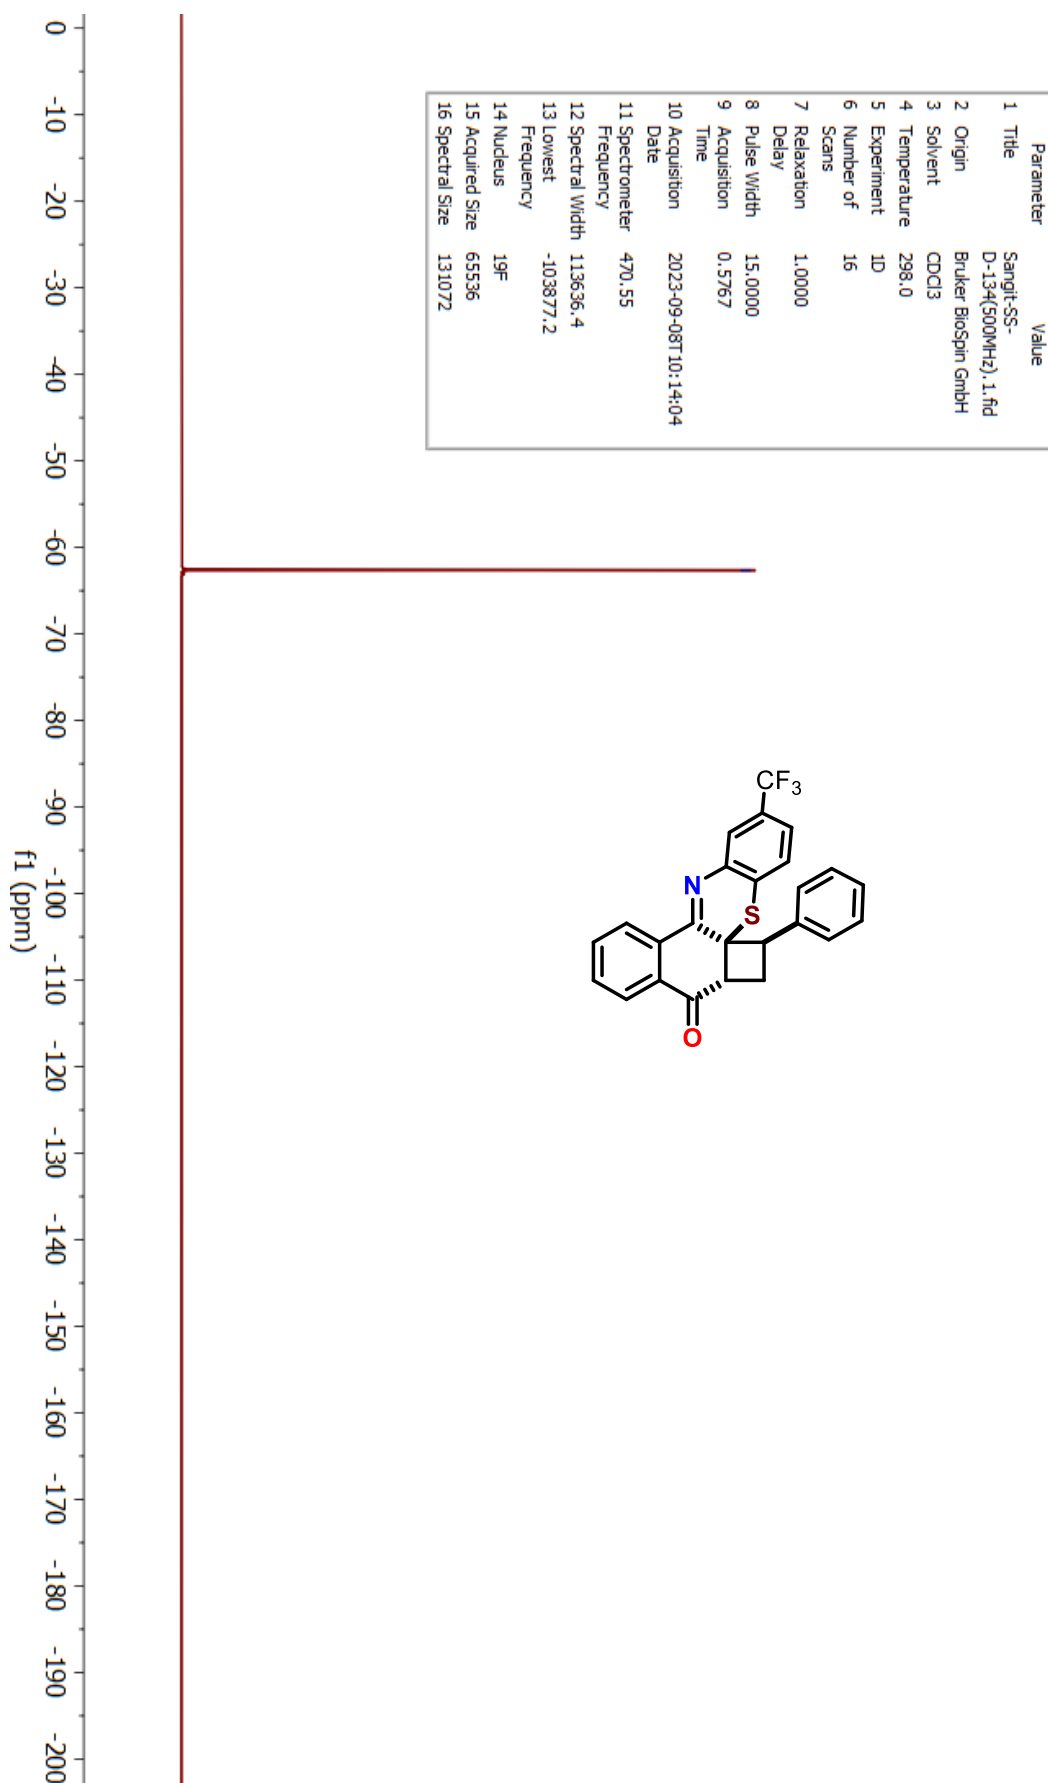

<sup>1</sup>H NMR spectra of **2ad**

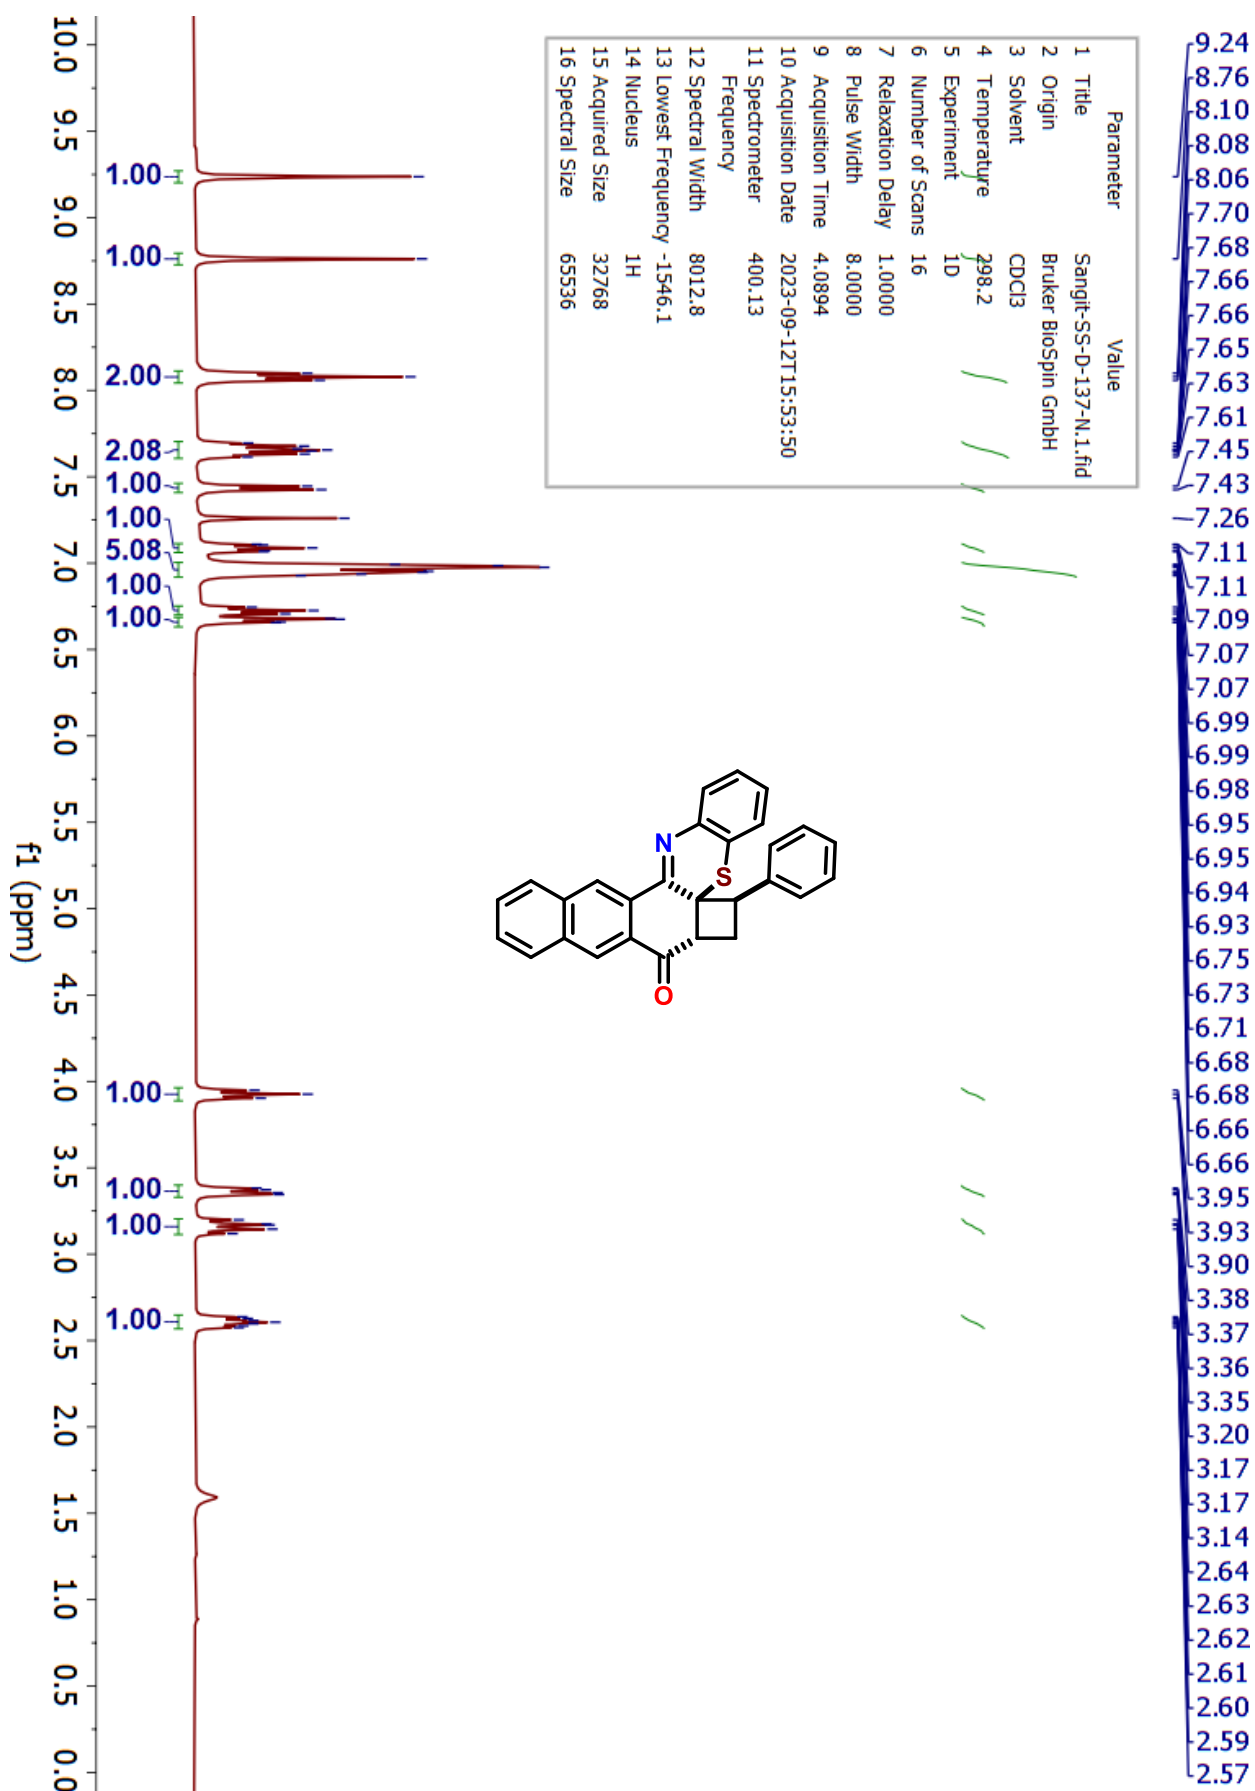



$^{13}\text{C}\{^1\text{H}\}$  NMR spectra of **2ad**

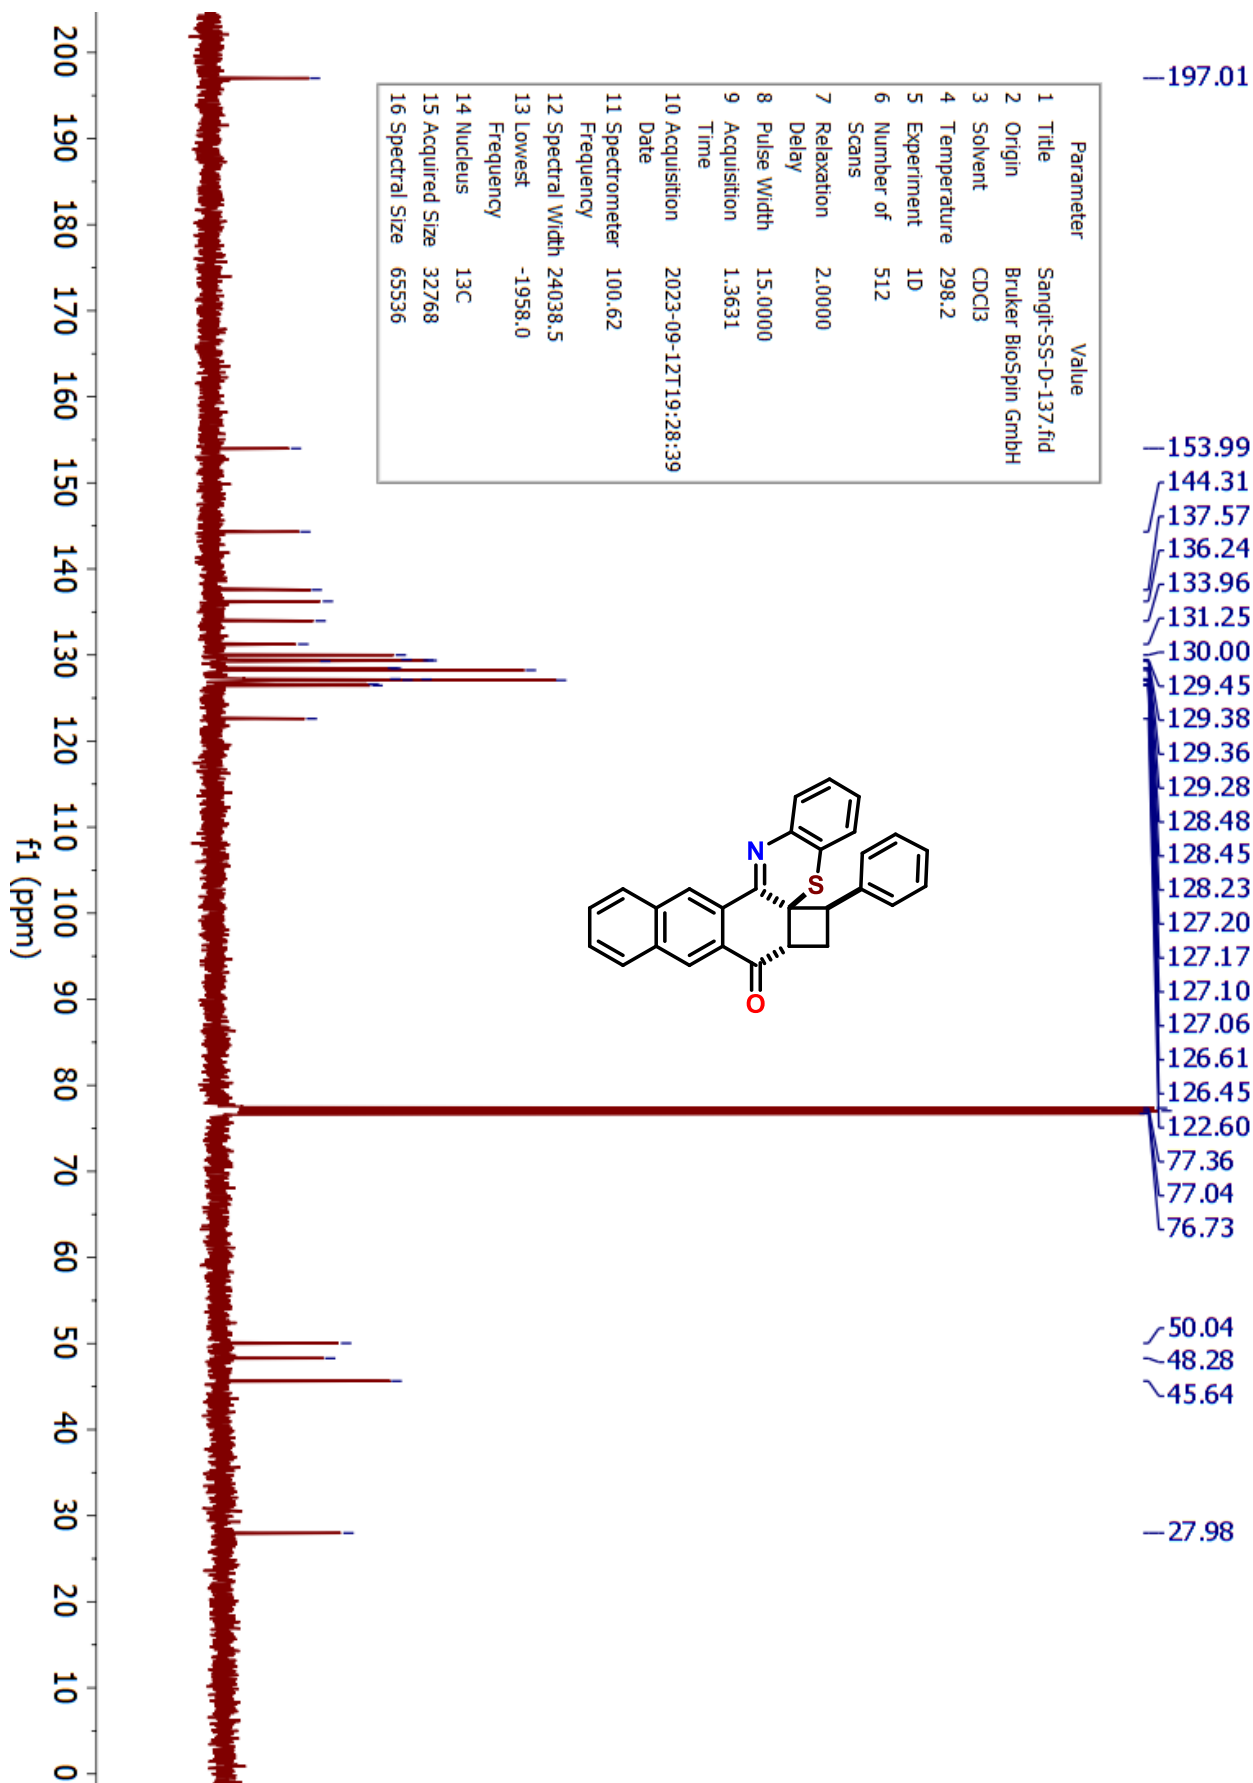

<sup>1</sup>H NMR spectra of **2ae**

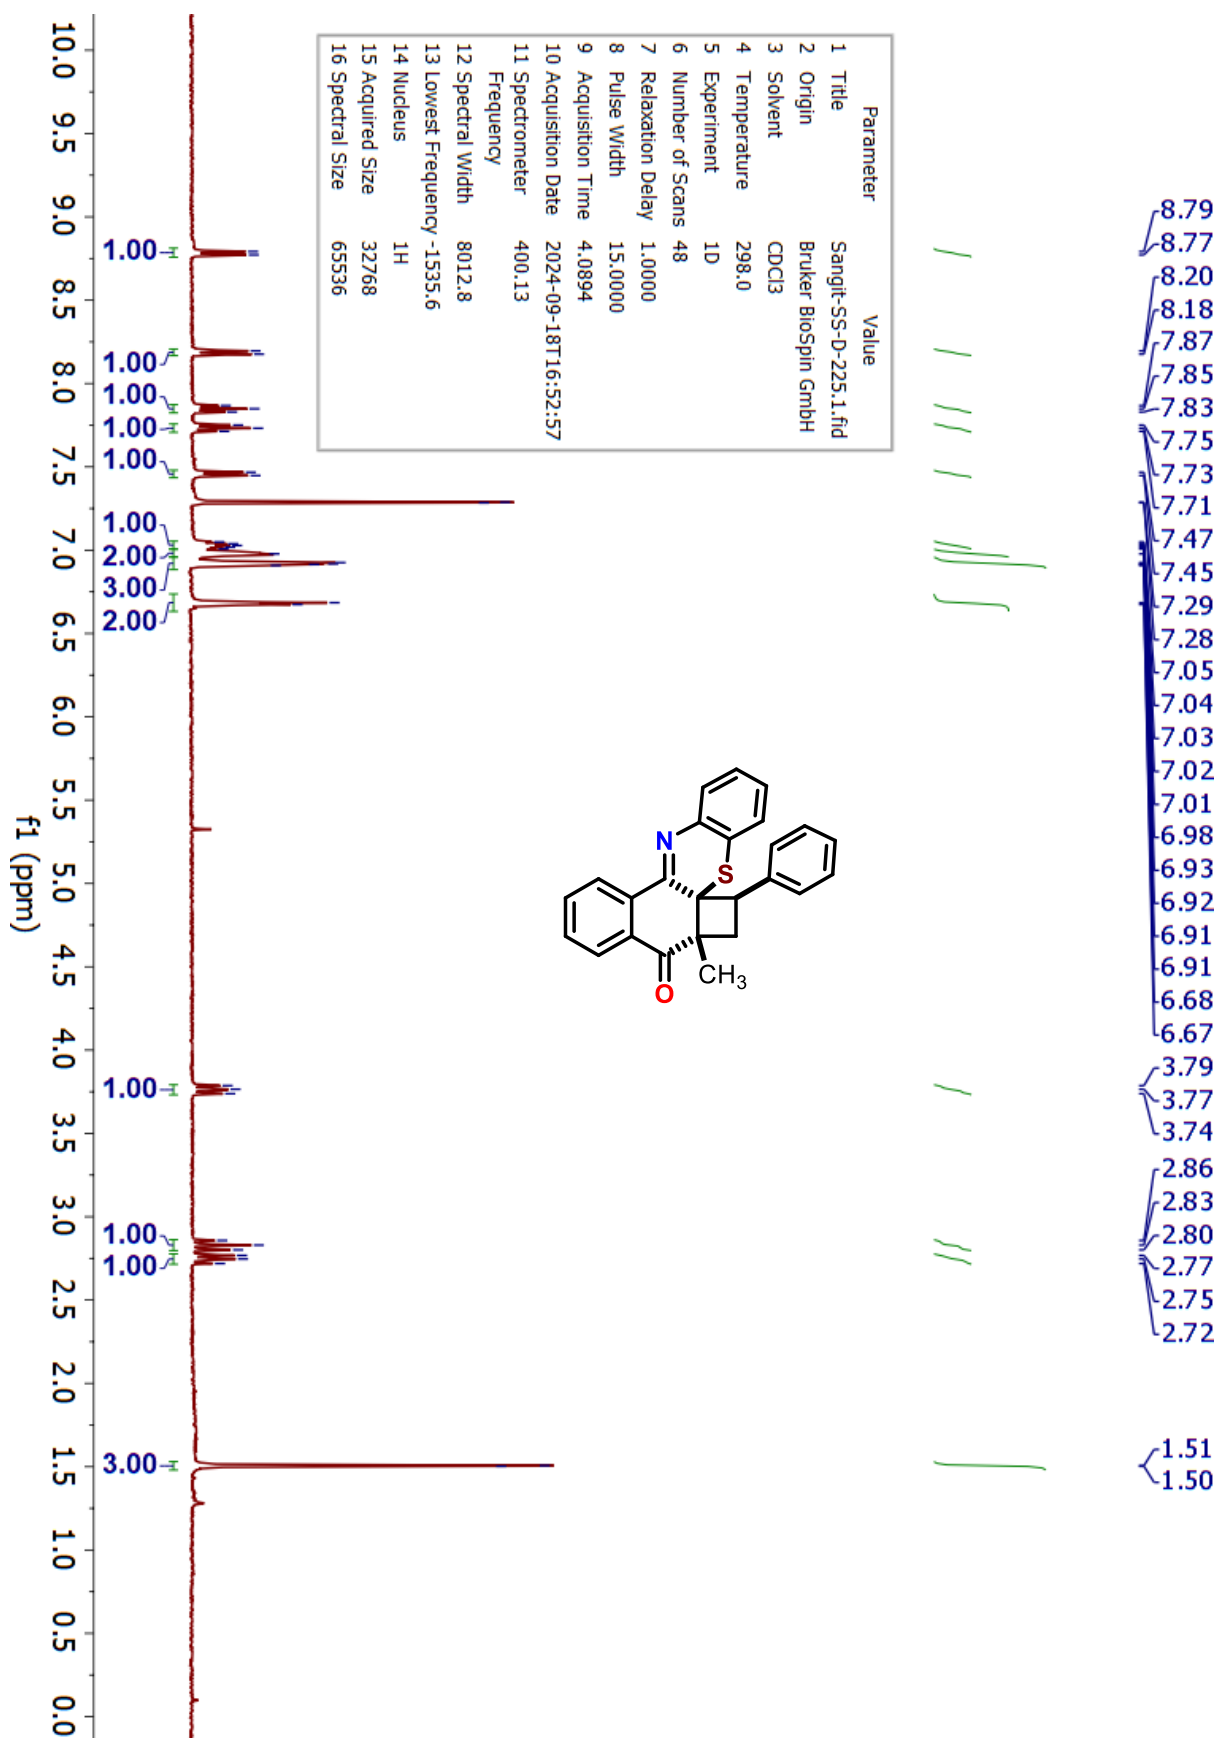

$^{13}\text{C}\{^1\text{H}\}$  NMR spectra of **2ae**

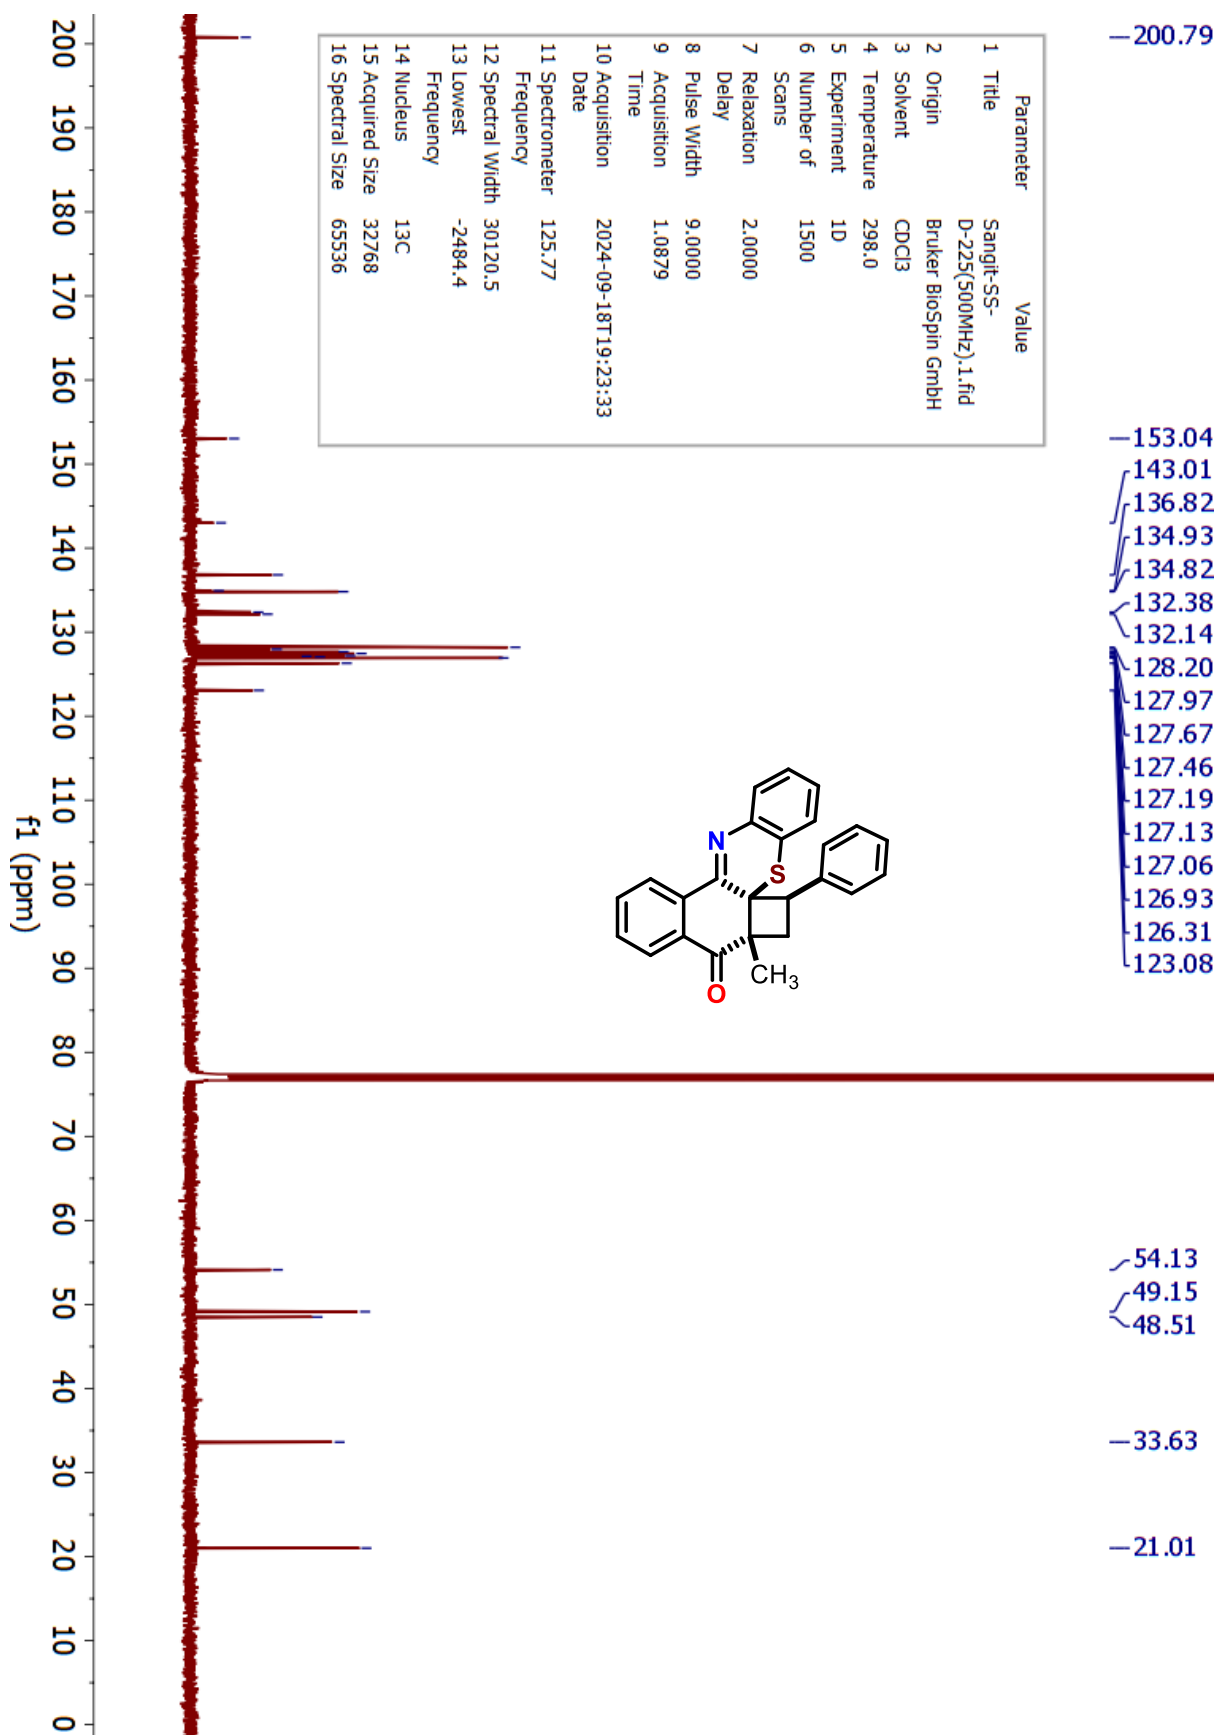

<sup>1</sup>H NMR spectra of **2af**

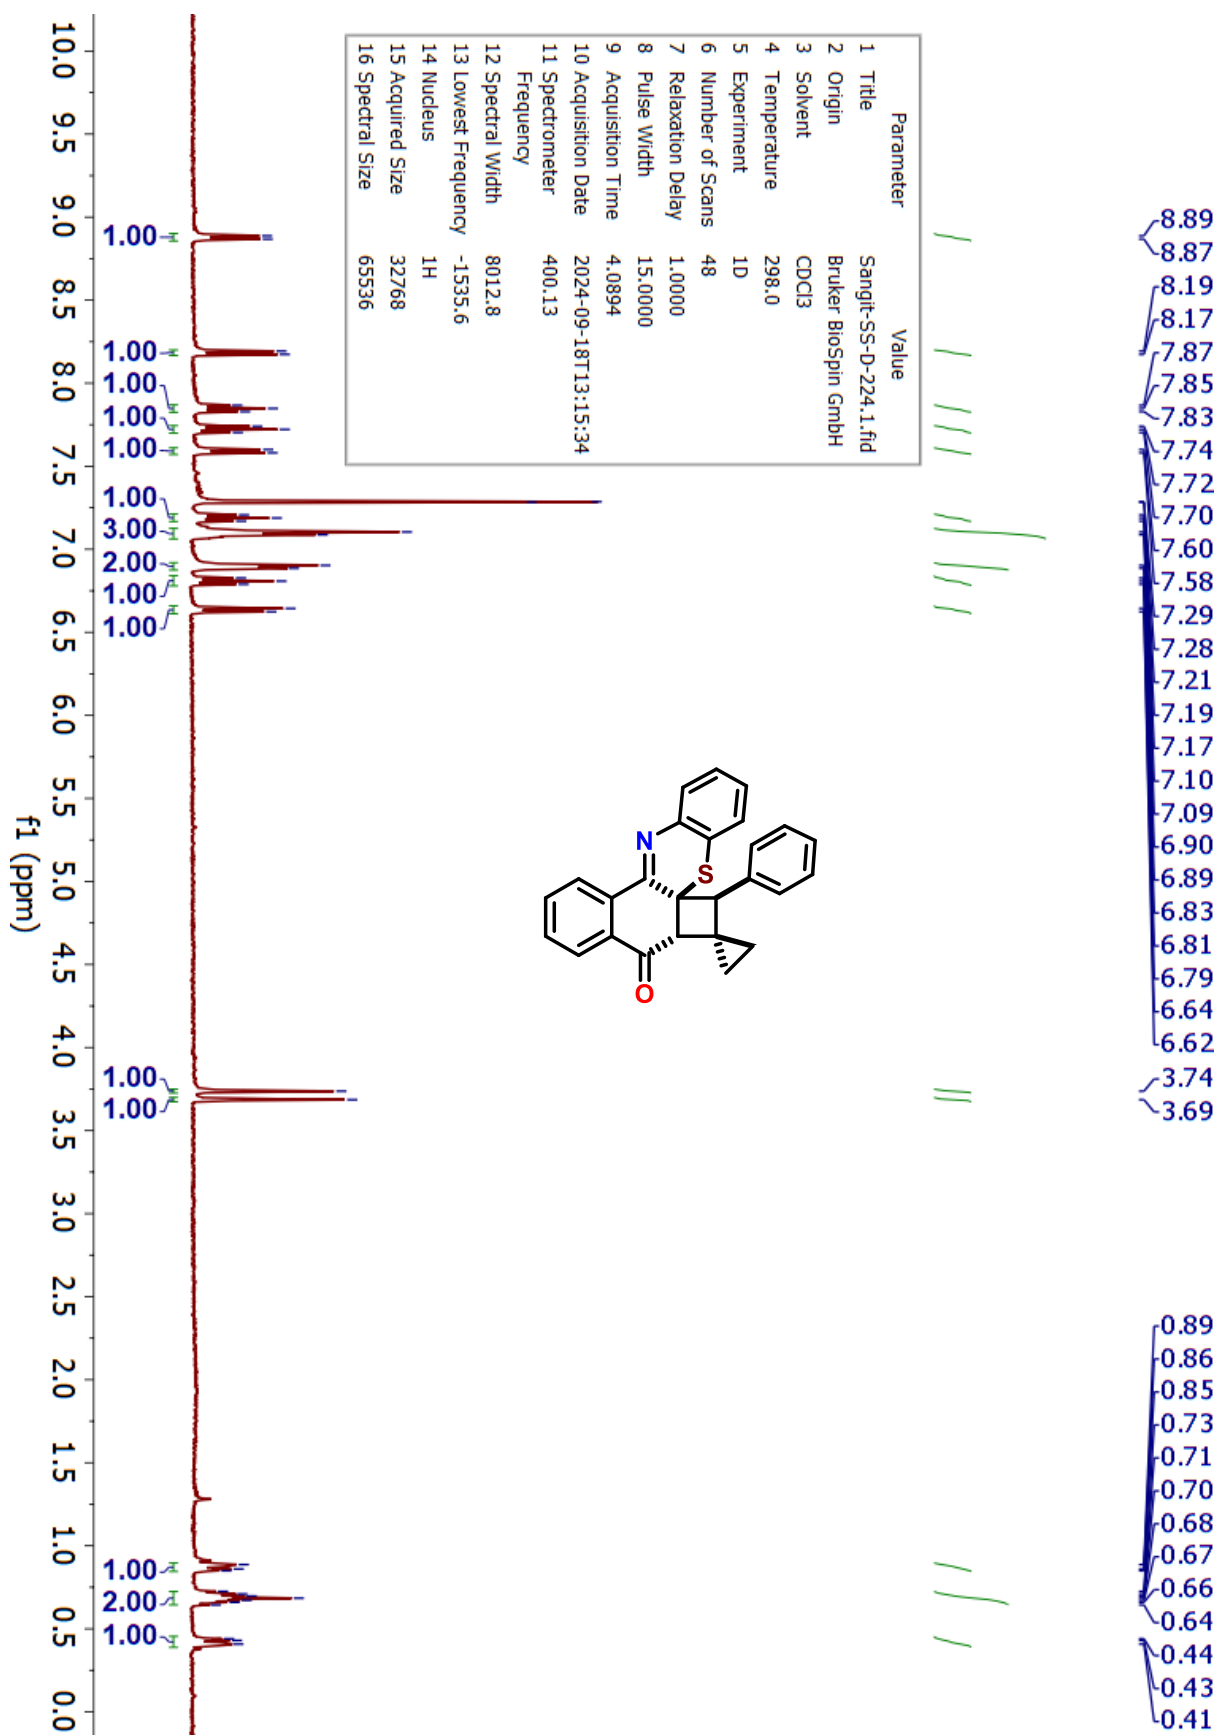

$^{13}\text{C}\{^1\text{H}\}$  NMR spectra of **2af**

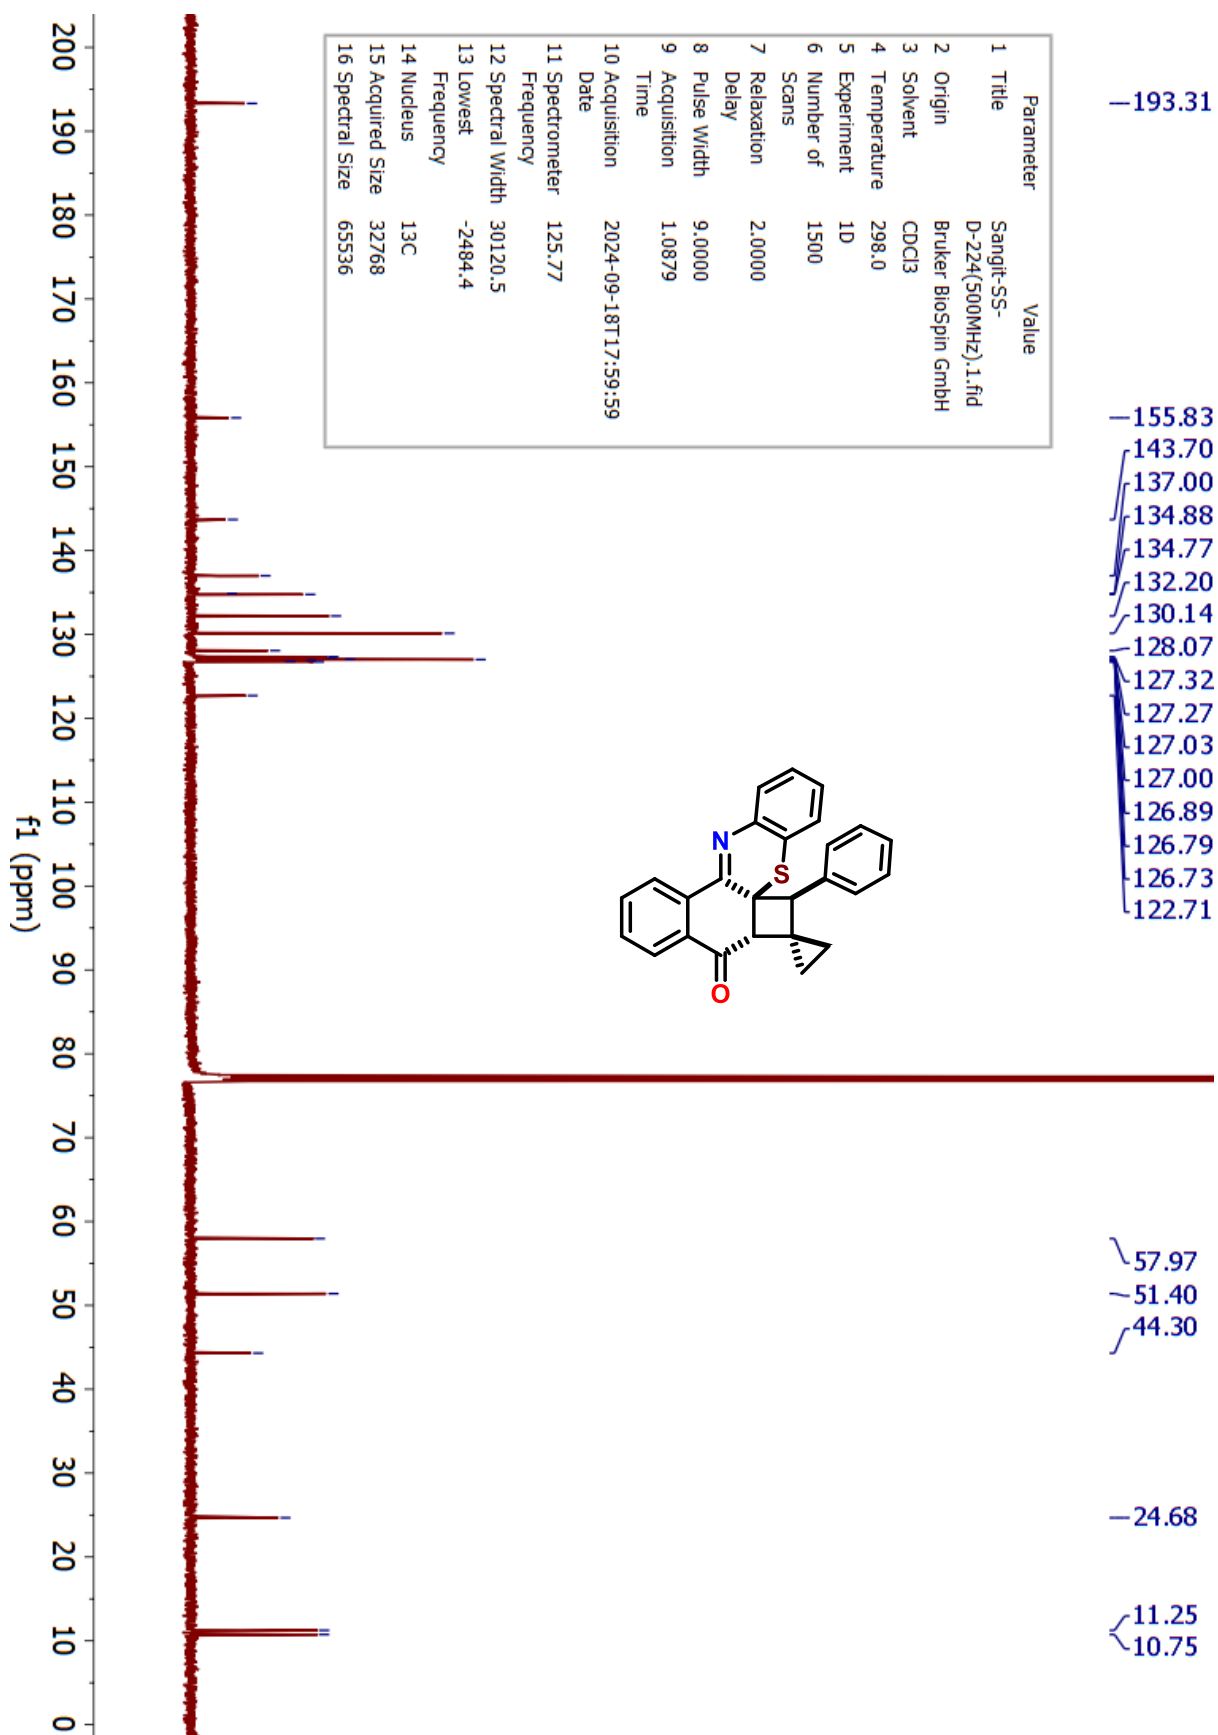



$^{13}\text{C}\{^1\text{H}\}$  NMR spectra of **2ag**

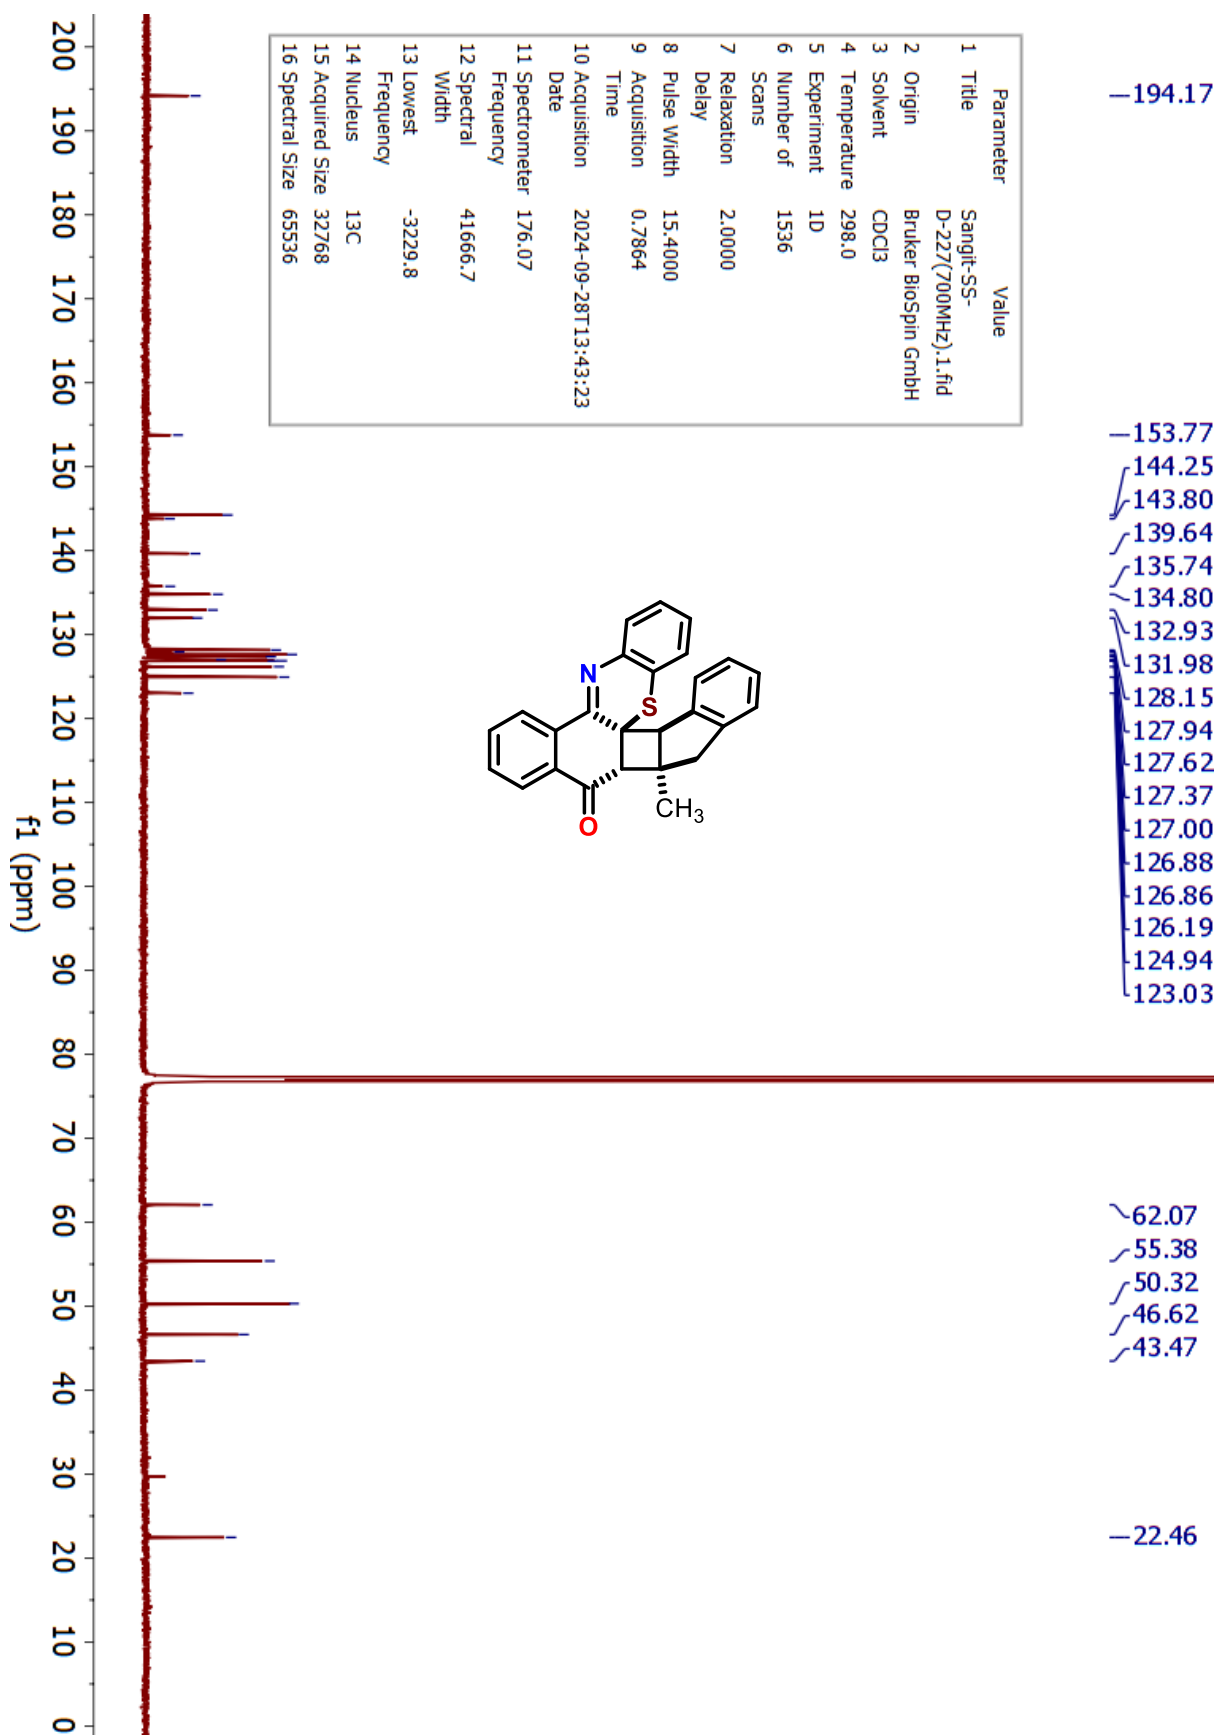

# Mass Spectrum of 2ah

## Display Report

### Analysis Info

|               |                                                              |                  |                     |
|---------------|--------------------------------------------------------------|------------------|---------------------|
| Analysis Name | D:\Data\USER DATA 2024\Aug-2024\29-aug\Dr.S.Kumar-SD-214-1.d | Acquisition Date | 29-08-2024 16:07:14 |
| Method        | tune_wide_APCI_23.06.m                                       | Operator         | Bruker              |
| Sample Name   | SD-214-1                                                     | Instrument       | micrOTOF-Q 10330    |
| Comment       |                                                              |                  |                     |

### Acquisition Parameter

|             |            |                       |           |                  |           |
|-------------|------------|-----------------------|-----------|------------------|-----------|
| Source Type | Multi Mode | Ion Polarity          | Positive  | Set Nebulizer    | 29.0 psi  |
| Focus       | Not active | Set Capillary         | 2500 V    | Set Dry Heater   | 200 °C    |
| Scan Begin  | 50 m/z     | Set End Plate Offset  | -500 V    | Set Dry Gas      | 5.0 l/min |
| Scan End    | 3000 m/z   | Set Collision Cell RF | 750.0 Vpp | Set Divert Valve | Waste     |

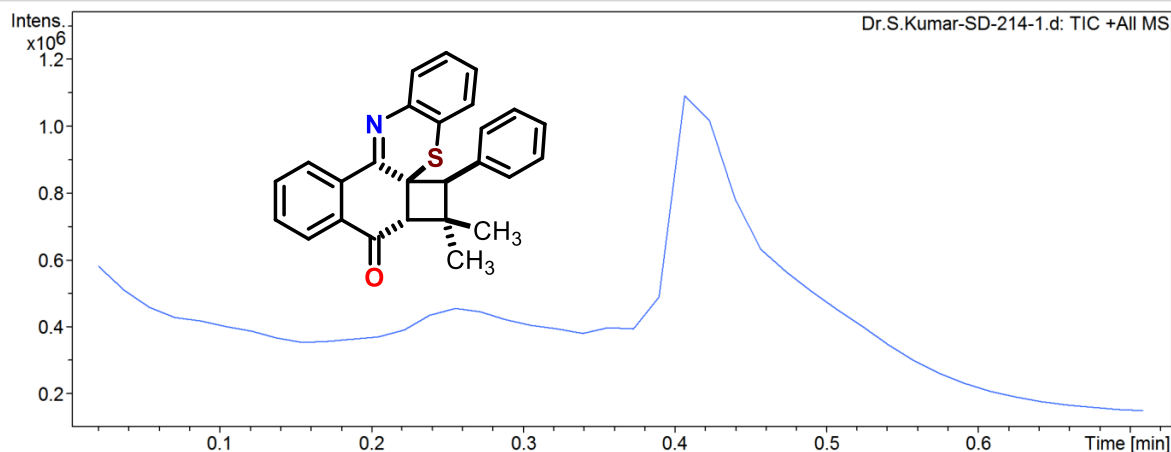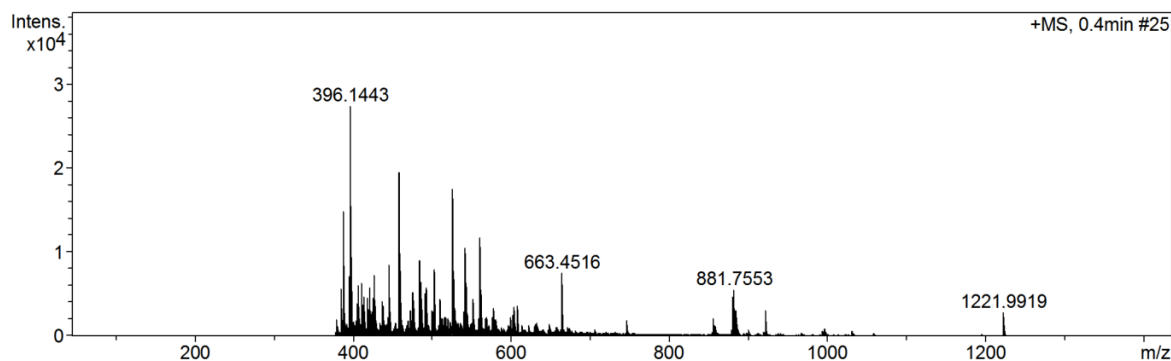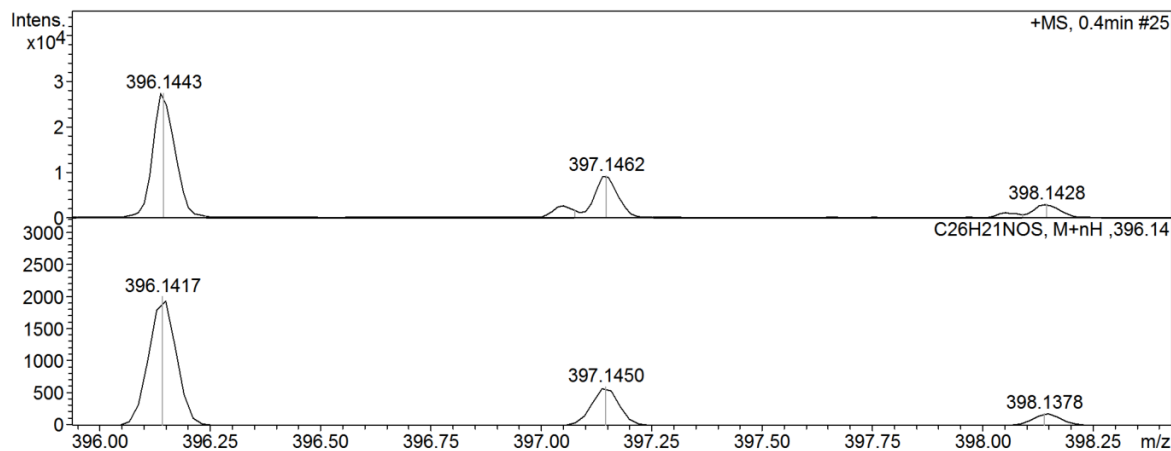



# Mass Spectrum of 2ai

## Display Report

### Analysis Info

Analysis Name D:\Data\USER DATA 2024\Sept-2024\18-sept-24\Prof.S.Kumar-SS-D-226.d  
Method tune\_low.m  
Sample Name SS-D-226  
Comment

Acquisition Date 18-09-2024 14:18:12  
Operator Bruker  
Instrument micrOTOF-Q 10330

### Acquisition Parameter

|             |            |                       |           |                  |           |
|-------------|------------|-----------------------|-----------|------------------|-----------|
| Source Type | ESI        | Ion Polarity          | Positive  | Set Nebulizer    | 7.3 psi   |
| Focus       | Not active | Set Capillary         | 4600 V    | Set Dry Heater   | 180 °C    |
| Scan Begin  | 50 m/z     | Set End Plate Offset  | -500 V    | Set Dry Gas      | 5.0 l/min |
| Scan End    | 3000 m/z   | Set Collision Cell RF | 150.0 Vpp | Set Divert Valve | Waste     |

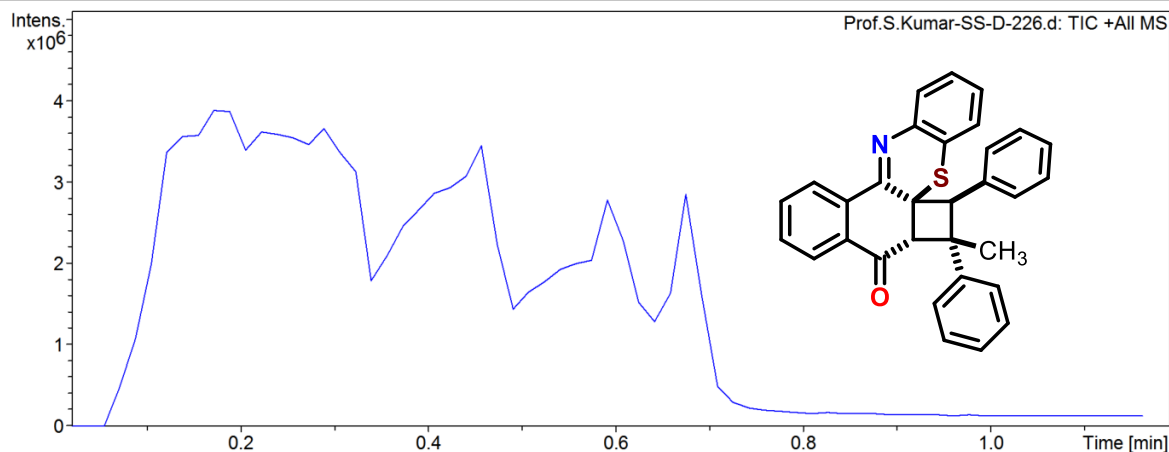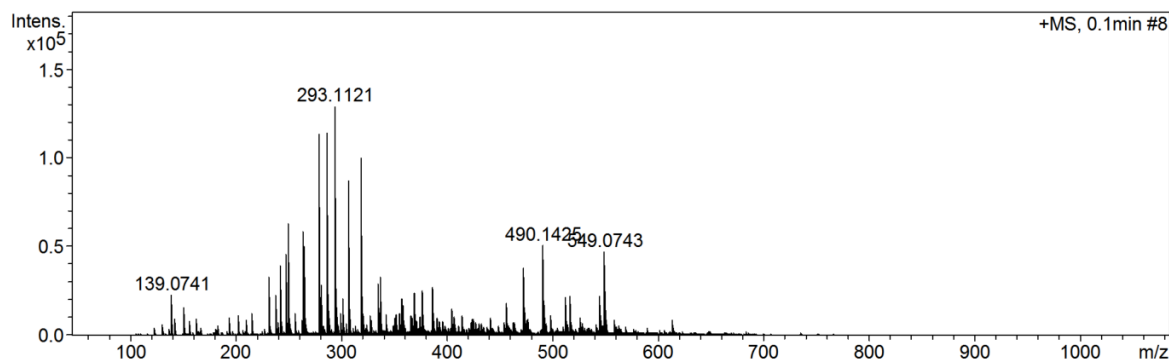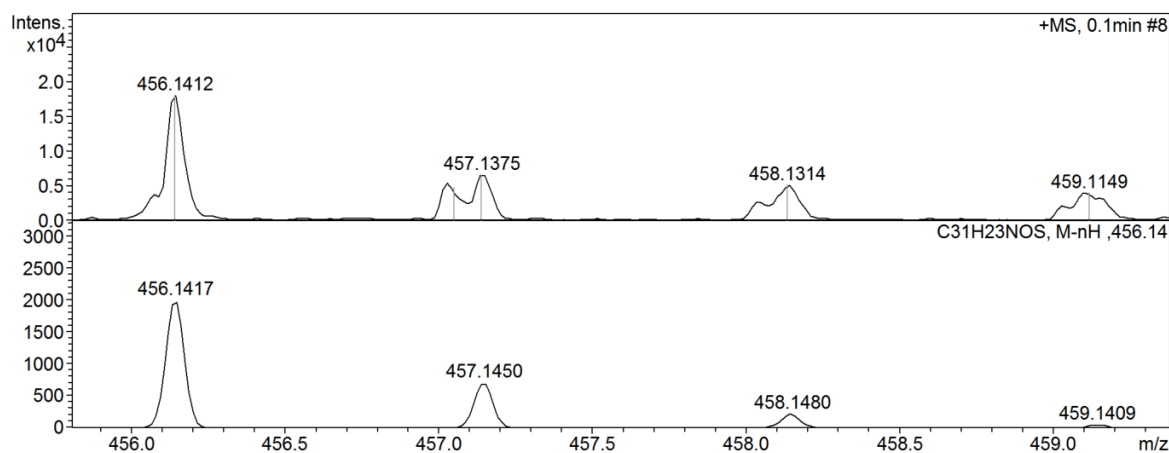

Sample Information

|                       |                              |                           |                                                                               |
|-----------------------|------------------------------|---------------------------|-------------------------------------------------------------------------------|
| <b>Name</b>           | SKUMAR-SS-213_030924         | <b>Data File Path</b>     | D:\Projects\small molecules\2024\SEPTEMBER 2024\03 sep\SKUMAR-SS-213_030924.d |
| <b>Sample ID</b>      |                              | <b>Acq. Time (Local)</b>  | 9/3/2024 3:22:43 PM (UTC+05:30)                                               |
| <b>Instrument</b>     | Agilent LCQTOF               | <b>Method Path (Acq)</b>  | D:\Projects\SmallMolecule_Coloumn_21122022\Methods\PRINCI_250724.m            |
| <b>MS Type</b>        | QTOF                         | <b>Version (Acq SW)</b>   | 6200 series TOF/6500 series Q-TOF (11.0.221.1)                                |
| <b>Inj. Vol. (ul)</b> | 1                            | <b>IRM Status</b>         | Success                                                                       |
| <b>Position</b>       | P2-A5                        | <b>Method Path (DA)</b>   |                                                                               |
| <b>Plate Pos.</b>     |                              | <b>Target Source Path</b> |                                                                               |
| <b>Operator</b>       | Agilent Technologies (Admin) | <b>Result Summary</b>     | 1 qualified (1 targets)                                                       |

Sample Chromatograms

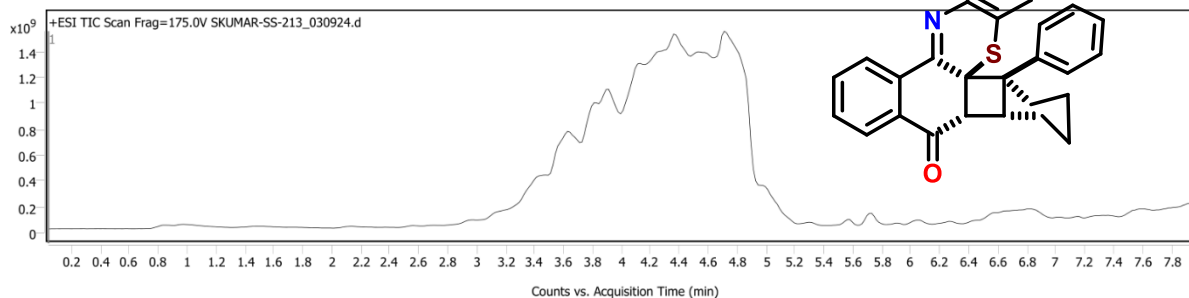

Compound Summary

| Cpd | Name | Formula       | RT    | Mass     | CAS | ID Source | Score | Score (Lib) | Score (DB) | Score (MFG) | Algorithm |
|-----|------|---------------|-------|----------|-----|-----------|-------|-------------|------------|-------------|-----------|
| 1   |      | C28 H23 N O S | 3.811 | 421.1497 |     | FBF       | 88.72 |             |            |             | FBF       |

Compound Details

Cpd. 1: C28 H23 N O S

| Name    | Formula       | RT          | RI          | Mass       | Score       | Algorithm  | Lib/DB |
|---------|---------------|-------------|-------------|------------|-------------|------------|--------|
|         | C28 H23 N O S | 3.811       |             | 421.1497   | 88.72       | FBF        |        |
| Species | m/z           | Score (Lib) | Num Spectra | Score (DB) | Score (MFG) | Score (RT) |        |
| (M+H)+  | 422.1572      |             |             |            |             |            |        |

Compound ID Table

| Name | Formula       | Species | RT    | RT Diff | Mass     | CAS | ID Source | Score | Score (DB) | Score (MFG) |
|------|---------------|---------|-------|---------|----------|-----|-----------|-------|------------|-------------|
|      | C28 H23 N O S | (M+H)+  | 3.811 |         | 421.1497 |     | FBF       | 88.72 |            |             |

Compound Chromatograms (overlaid)

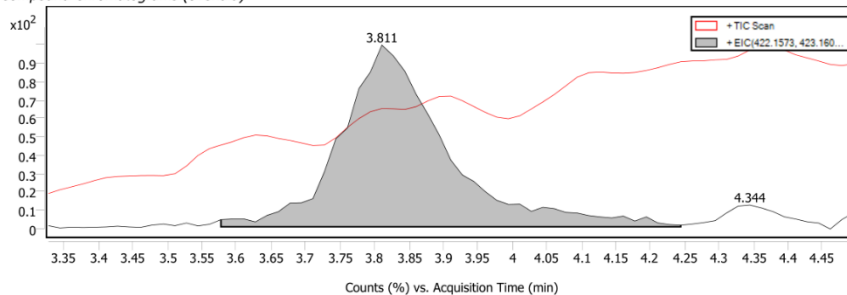

<sup>1</sup>H NMR spectra of **2ak**

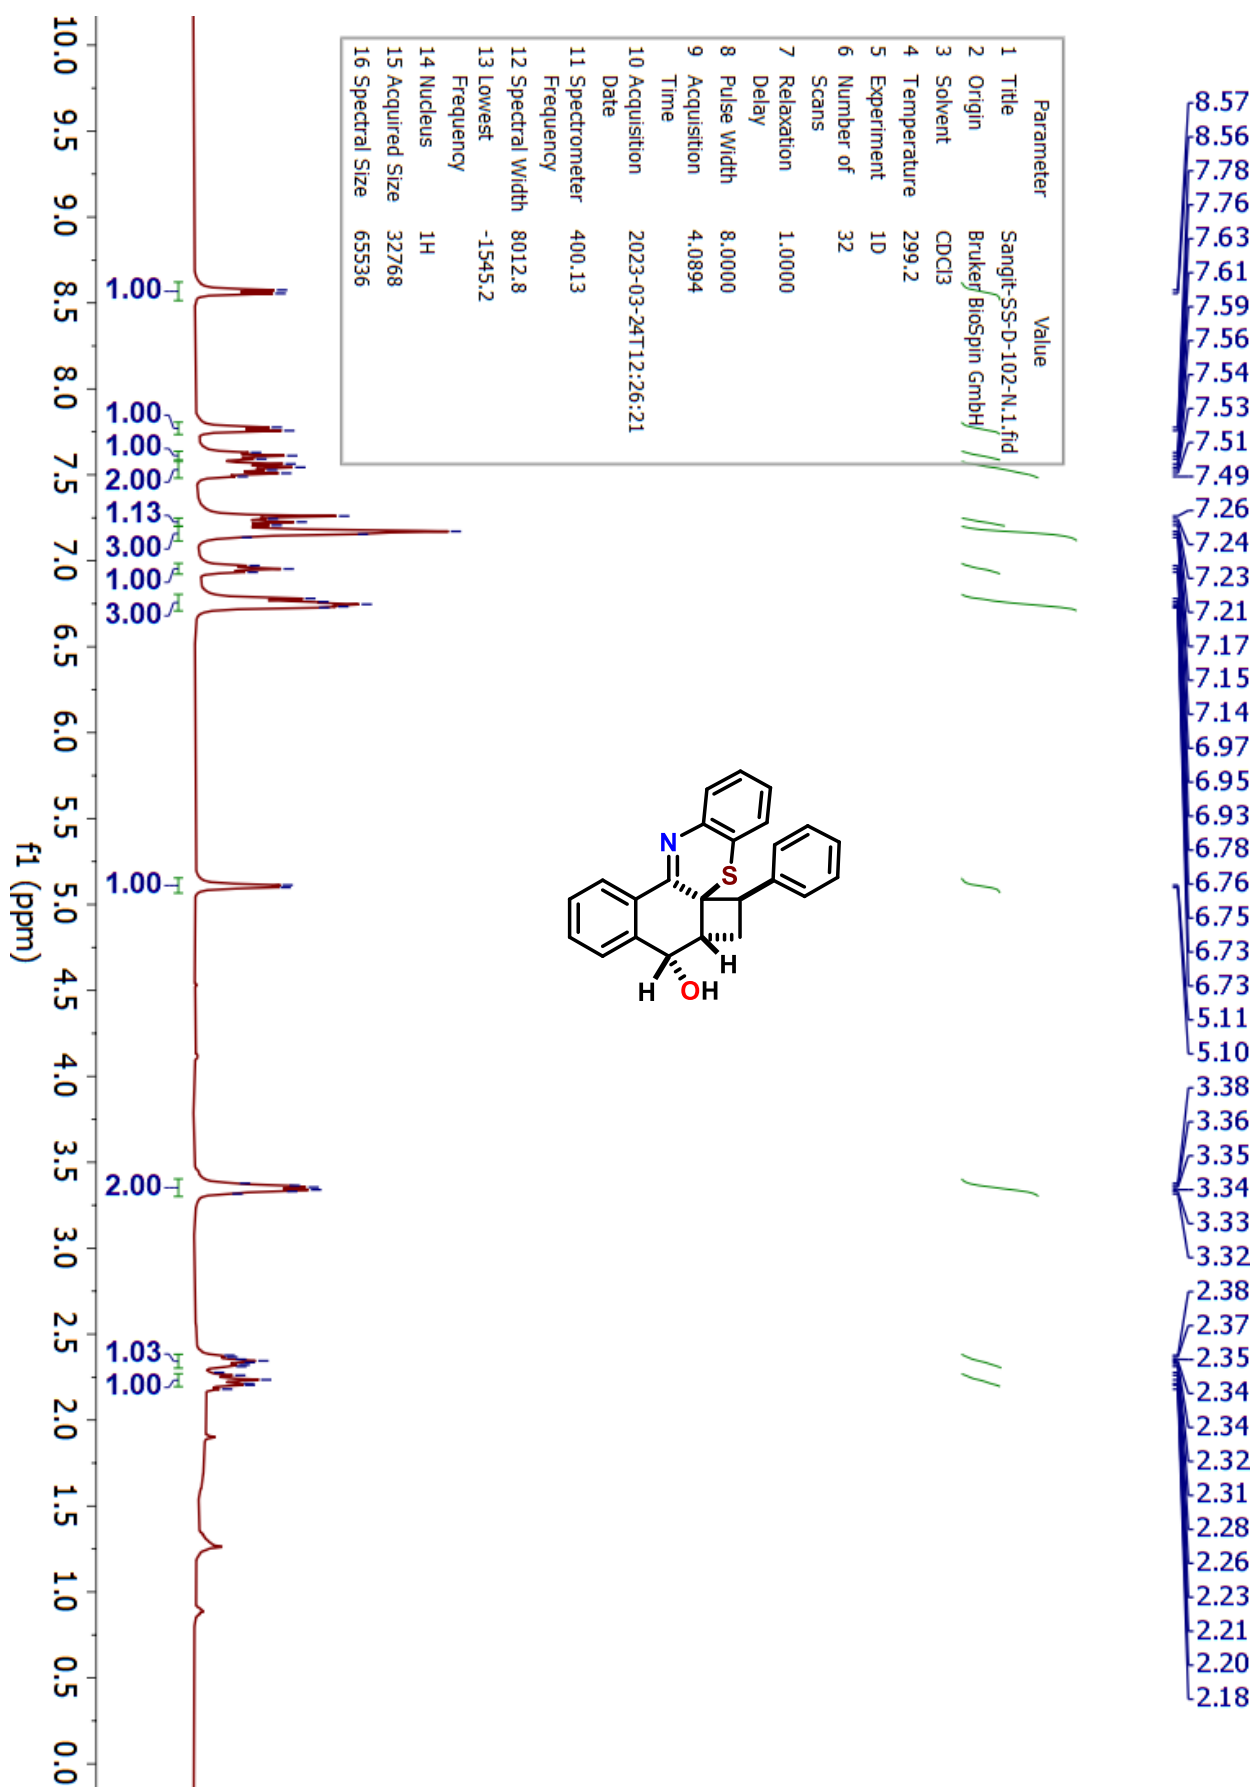

$^{13}\text{C}\{^1\text{H}\}$  NMR spectra of **2ak**

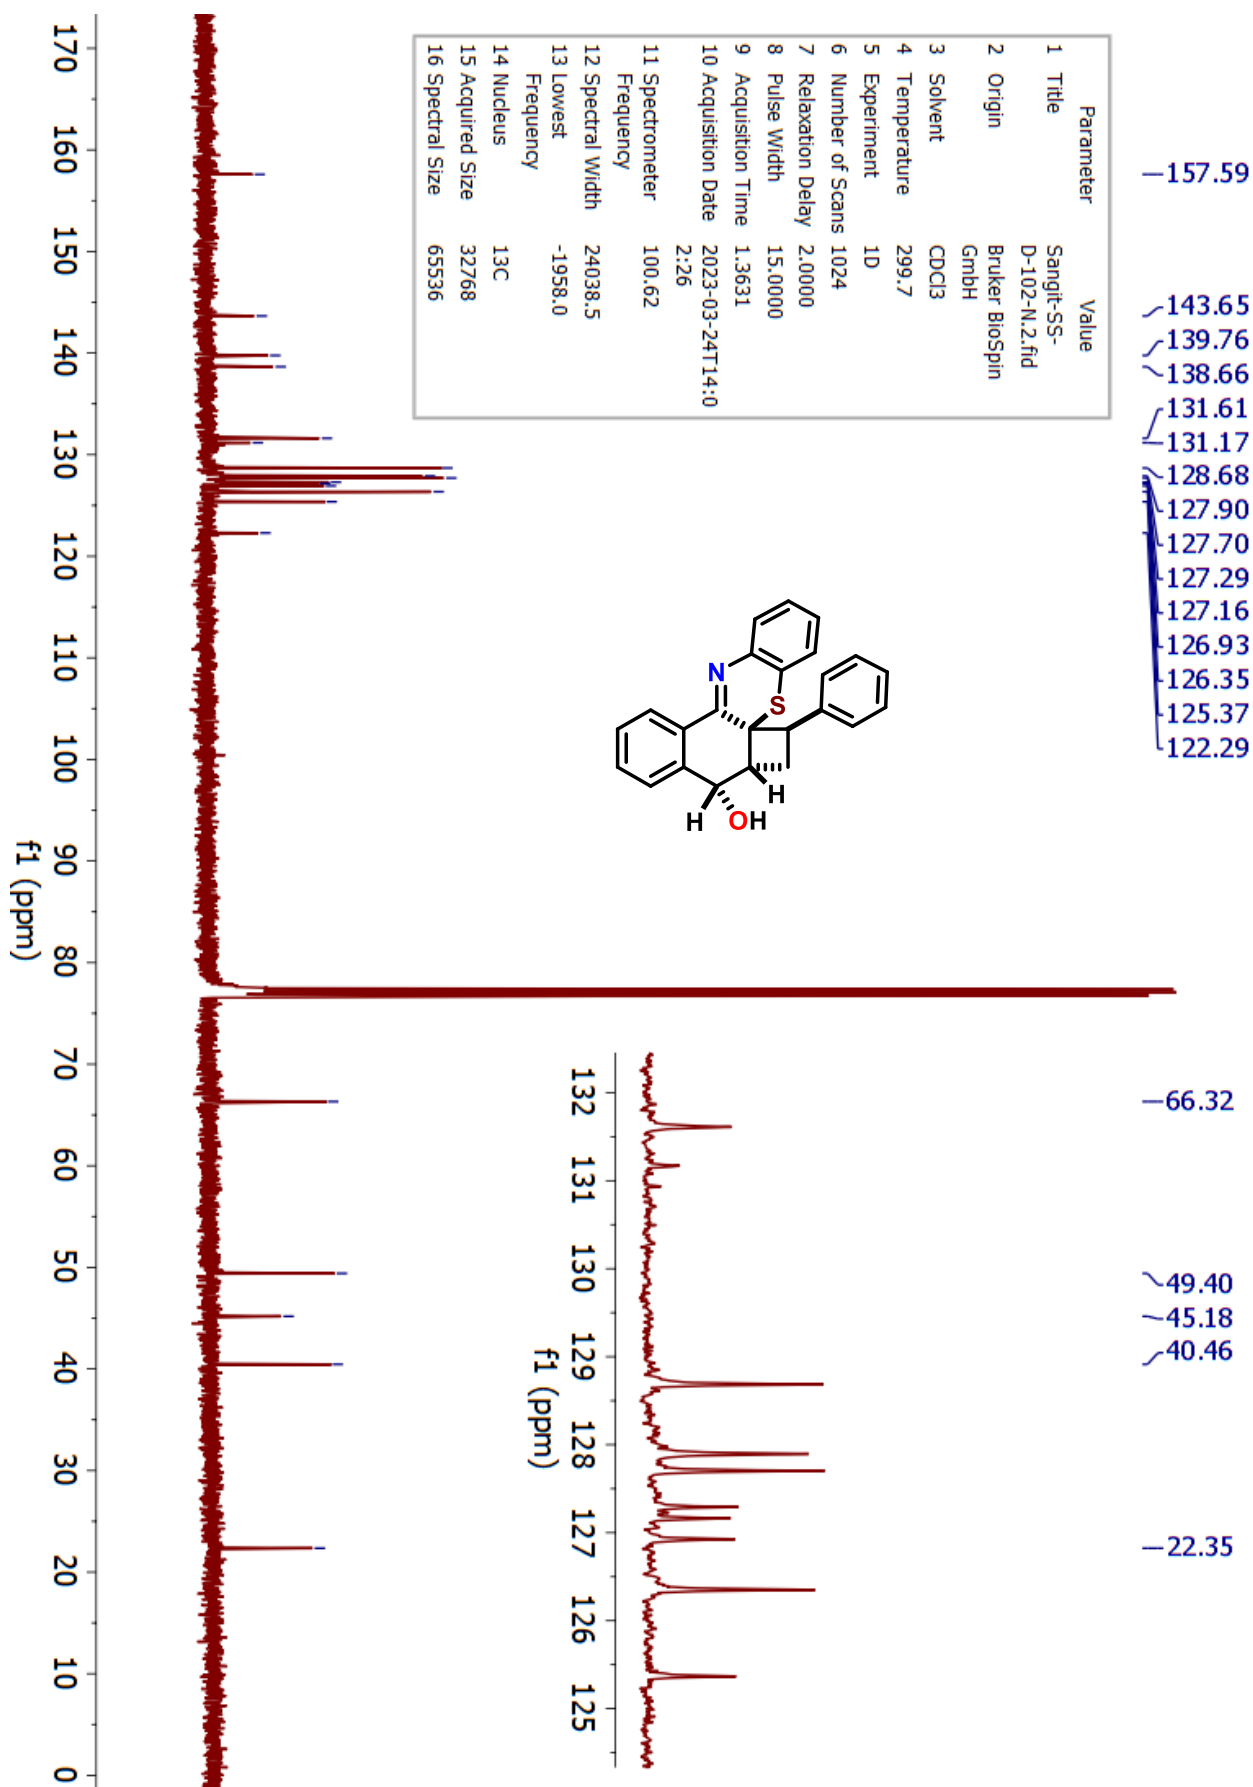



$^{13}\text{C}\{^1\text{H}\}$  NMR spectra of **2al**

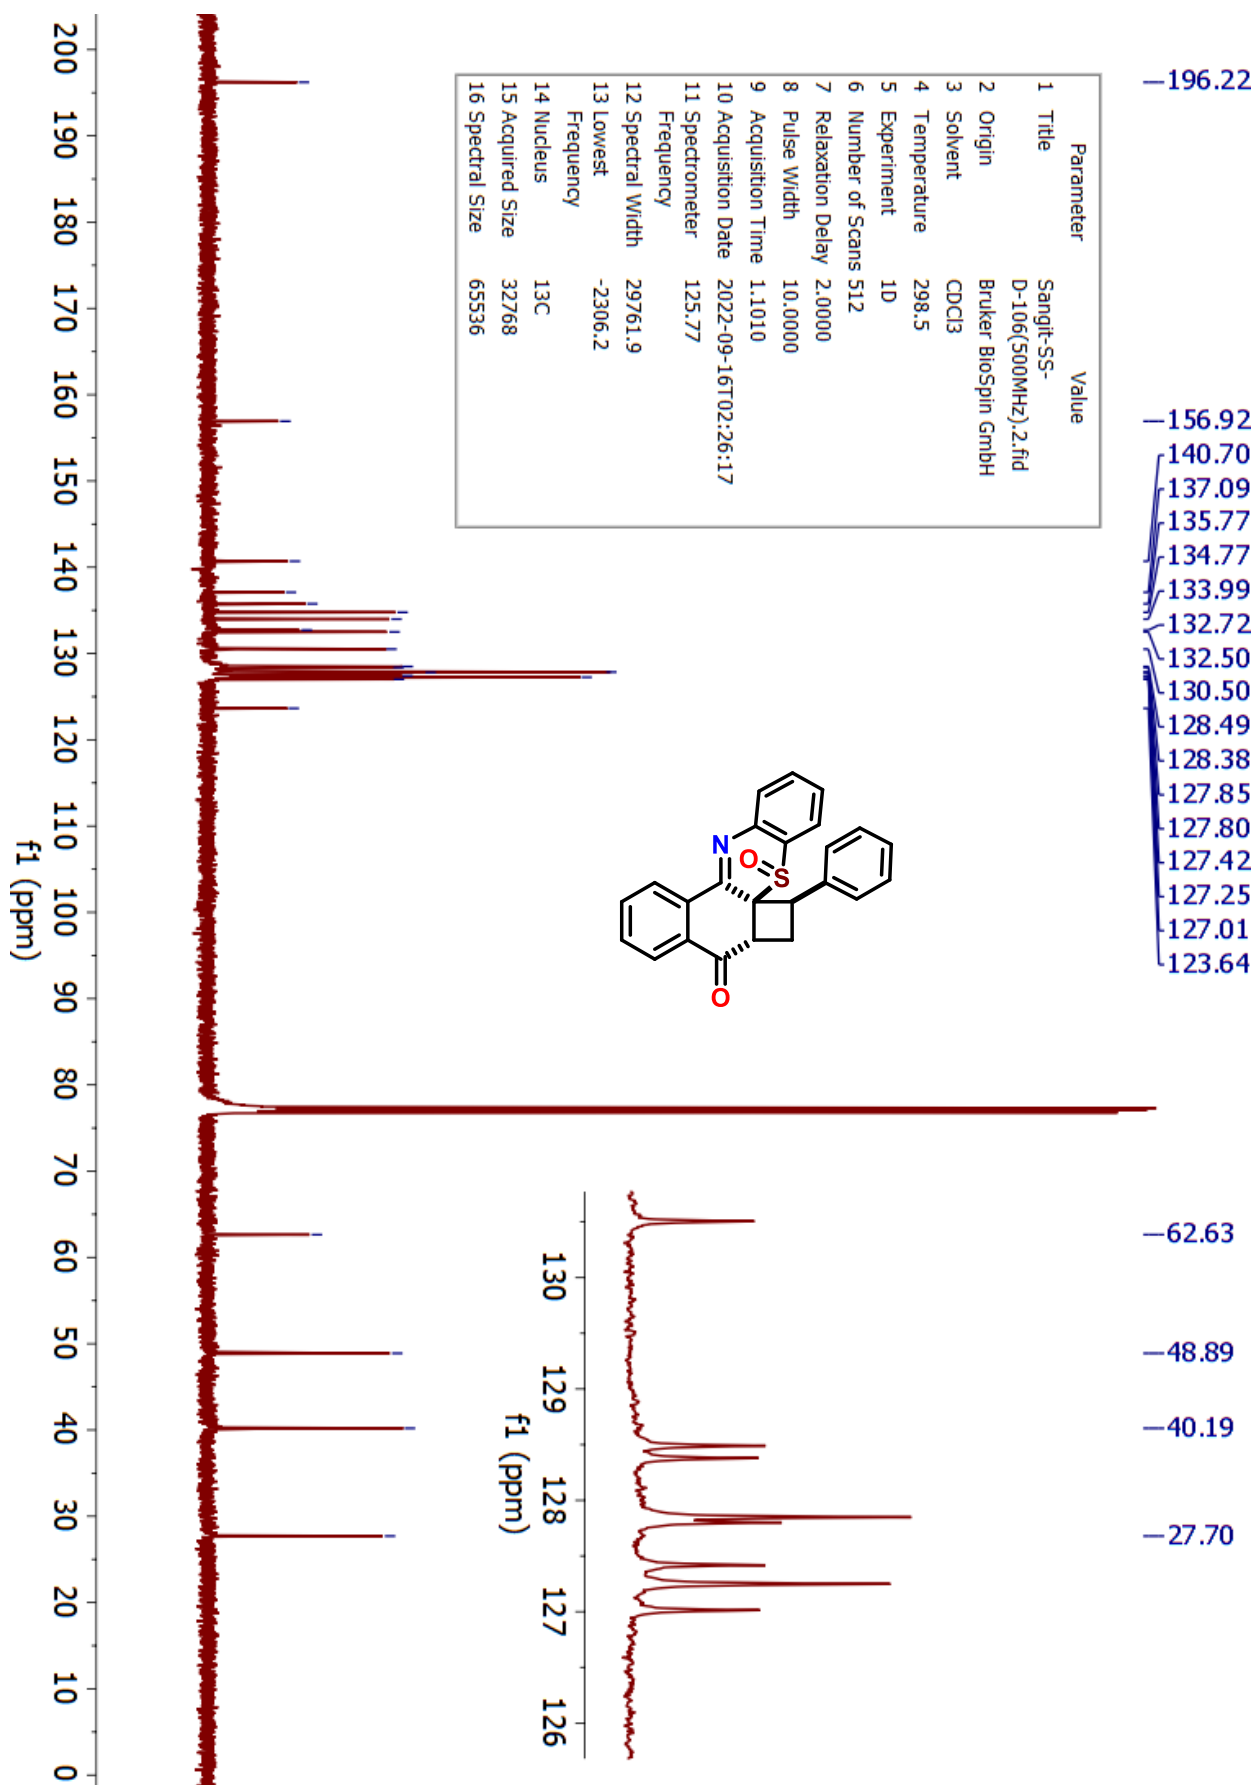

<sup>1</sup>H NMR spectra of **2am**

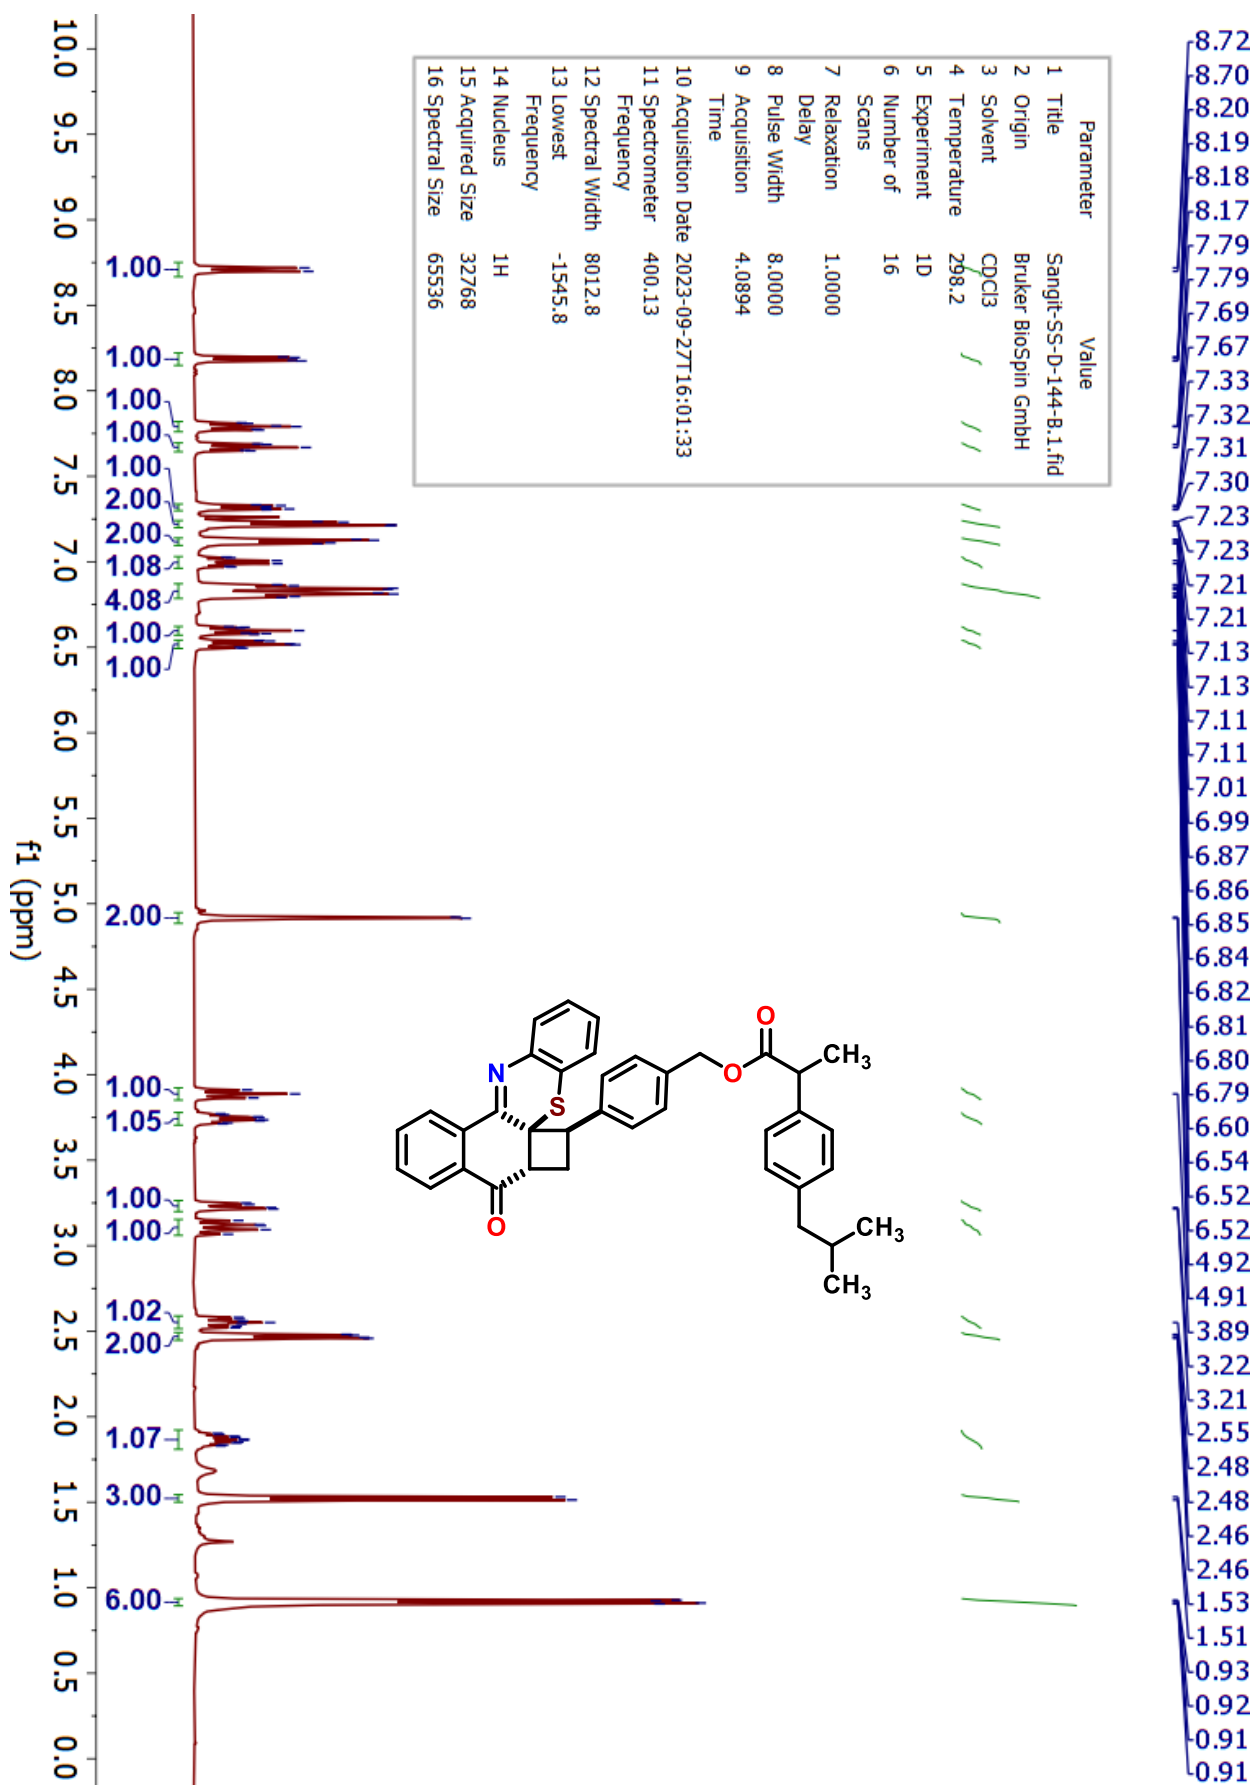

$^{13}\text{C}\{^1\text{H}\}$  NMR spectra of **2am**

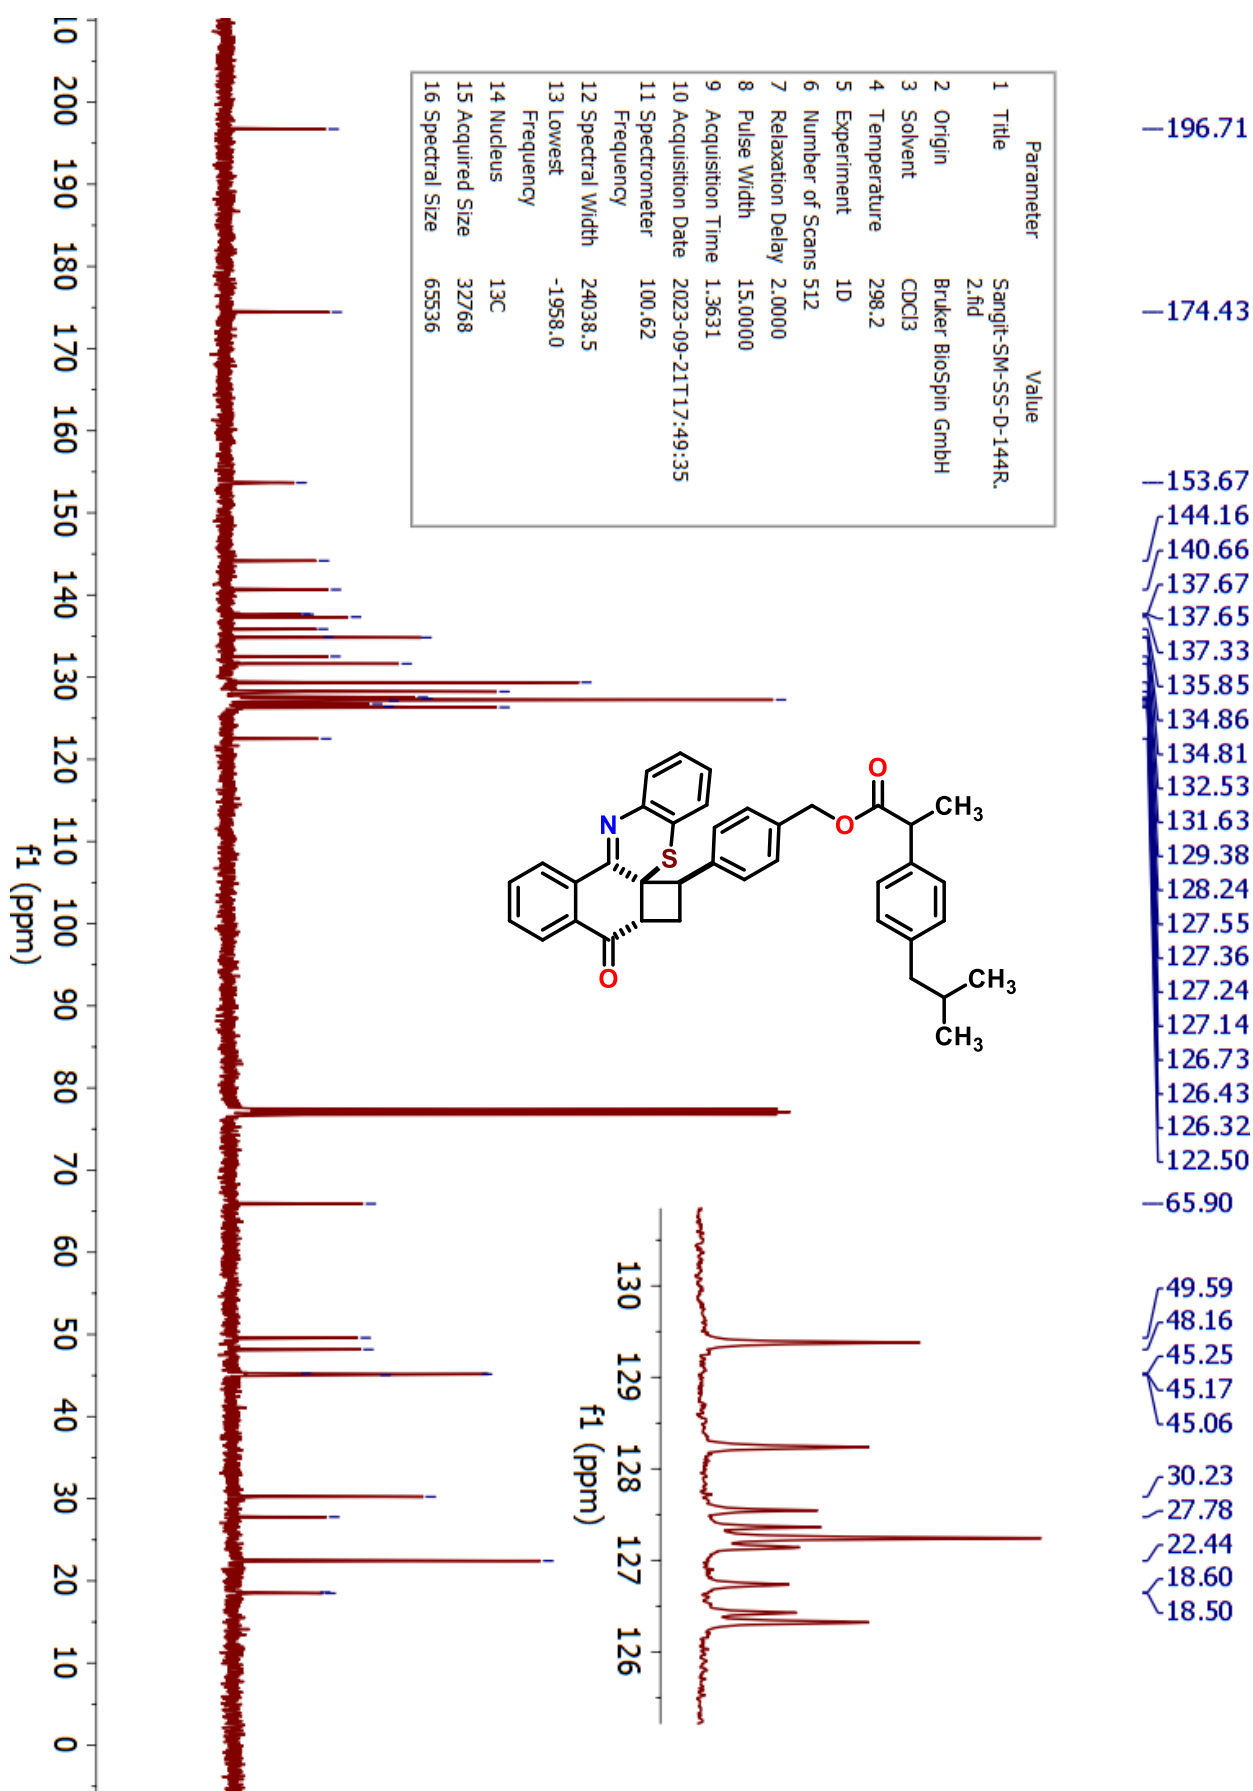



<sup>1</sup>H NMR spectra of **2an**

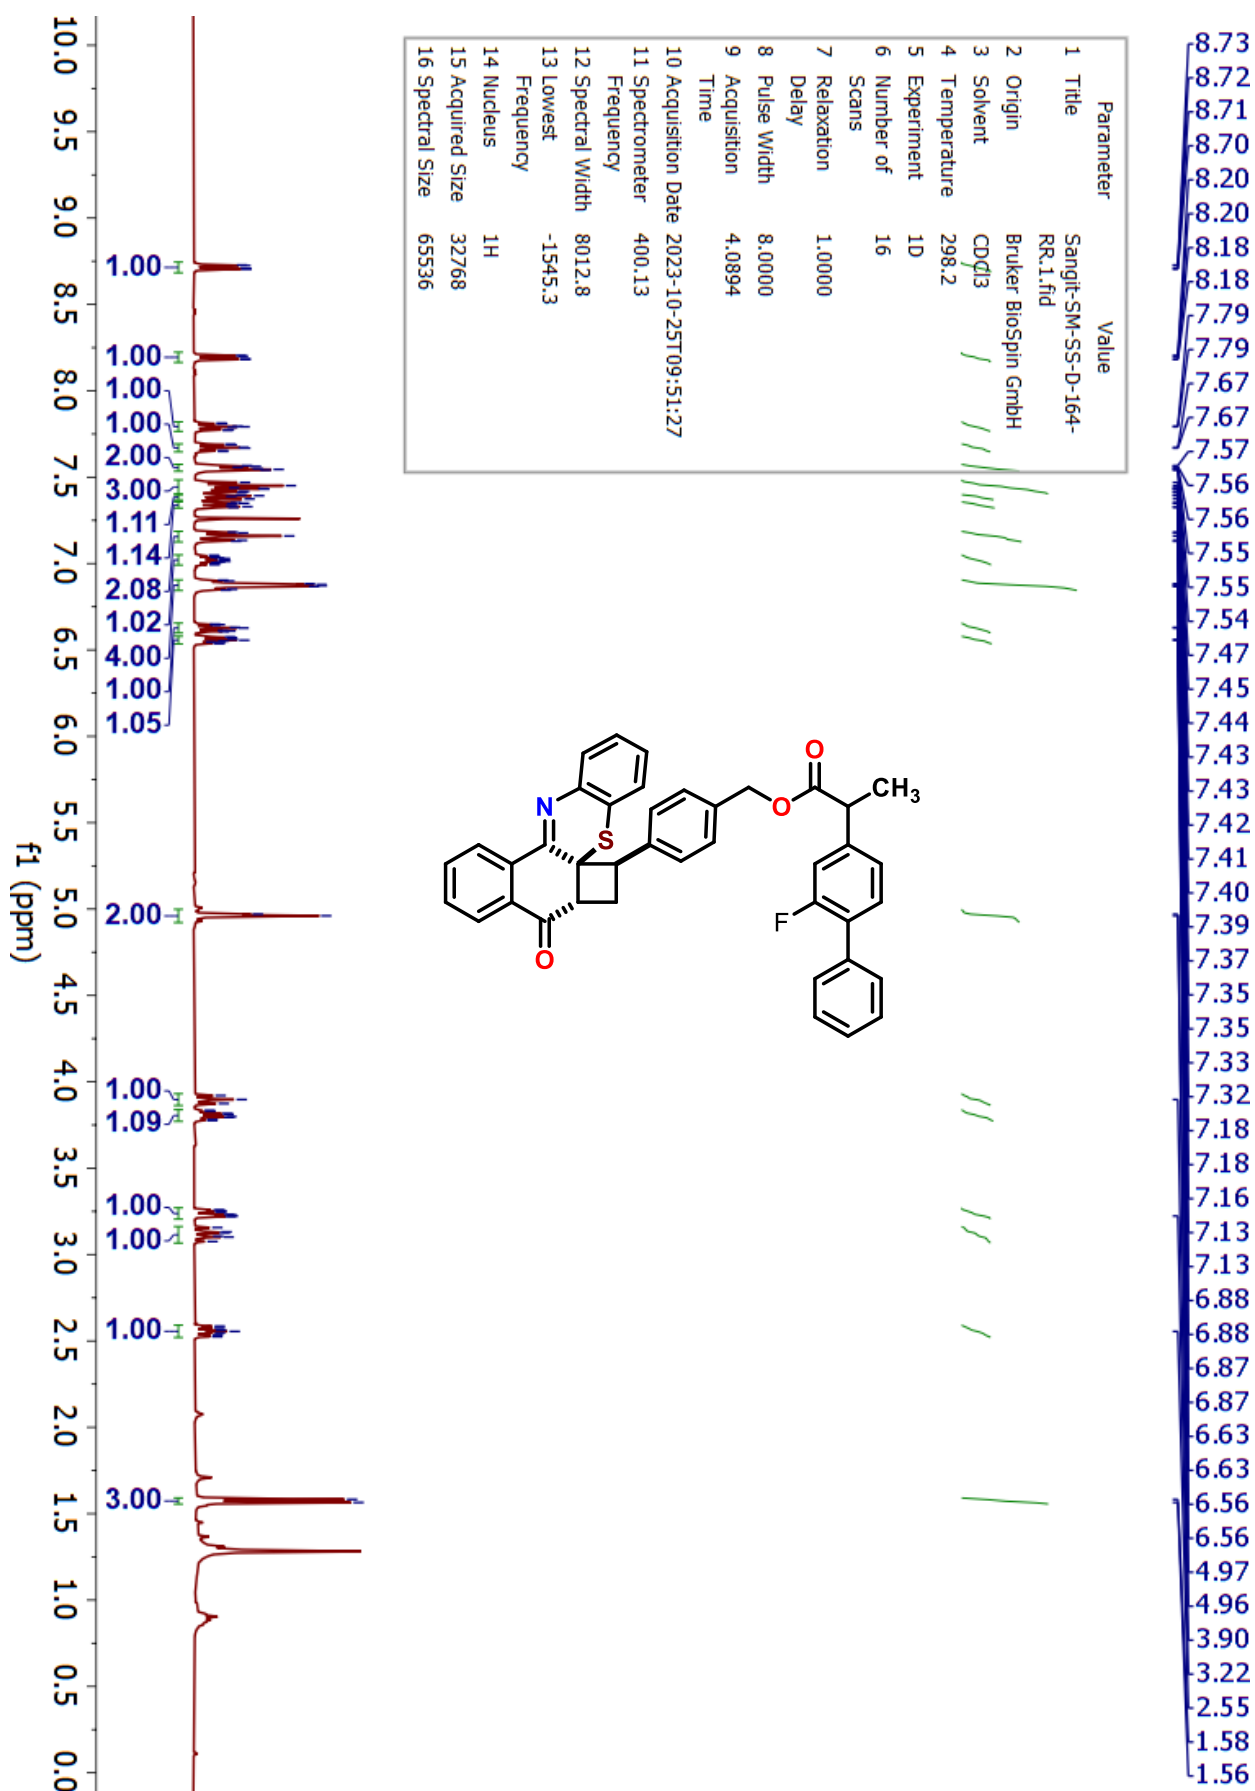

$^{13}\text{C}\{^1\text{H}\}$  NMR spectra of **2an**

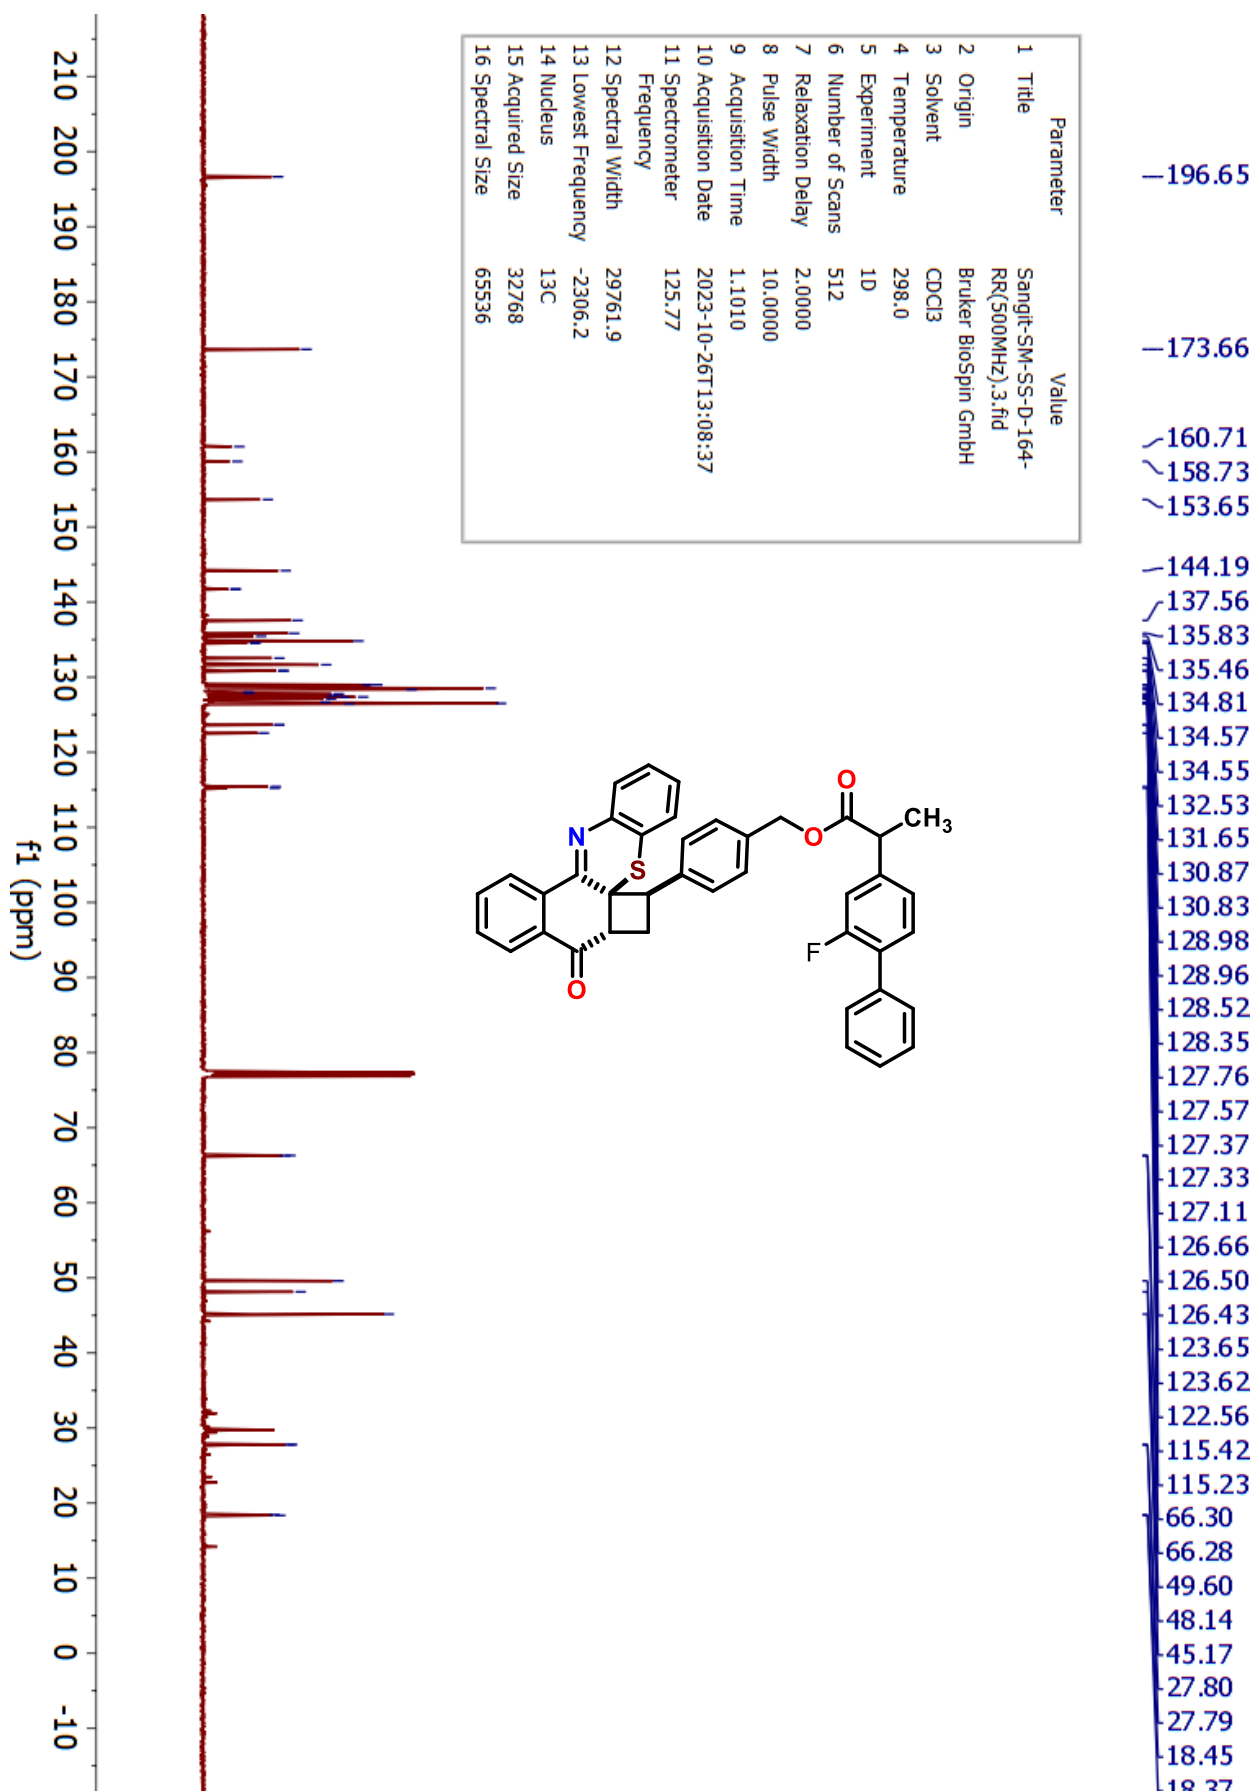

$^{19}\text{F}\{^1\text{H}\}$  NMR spectra of **2an**

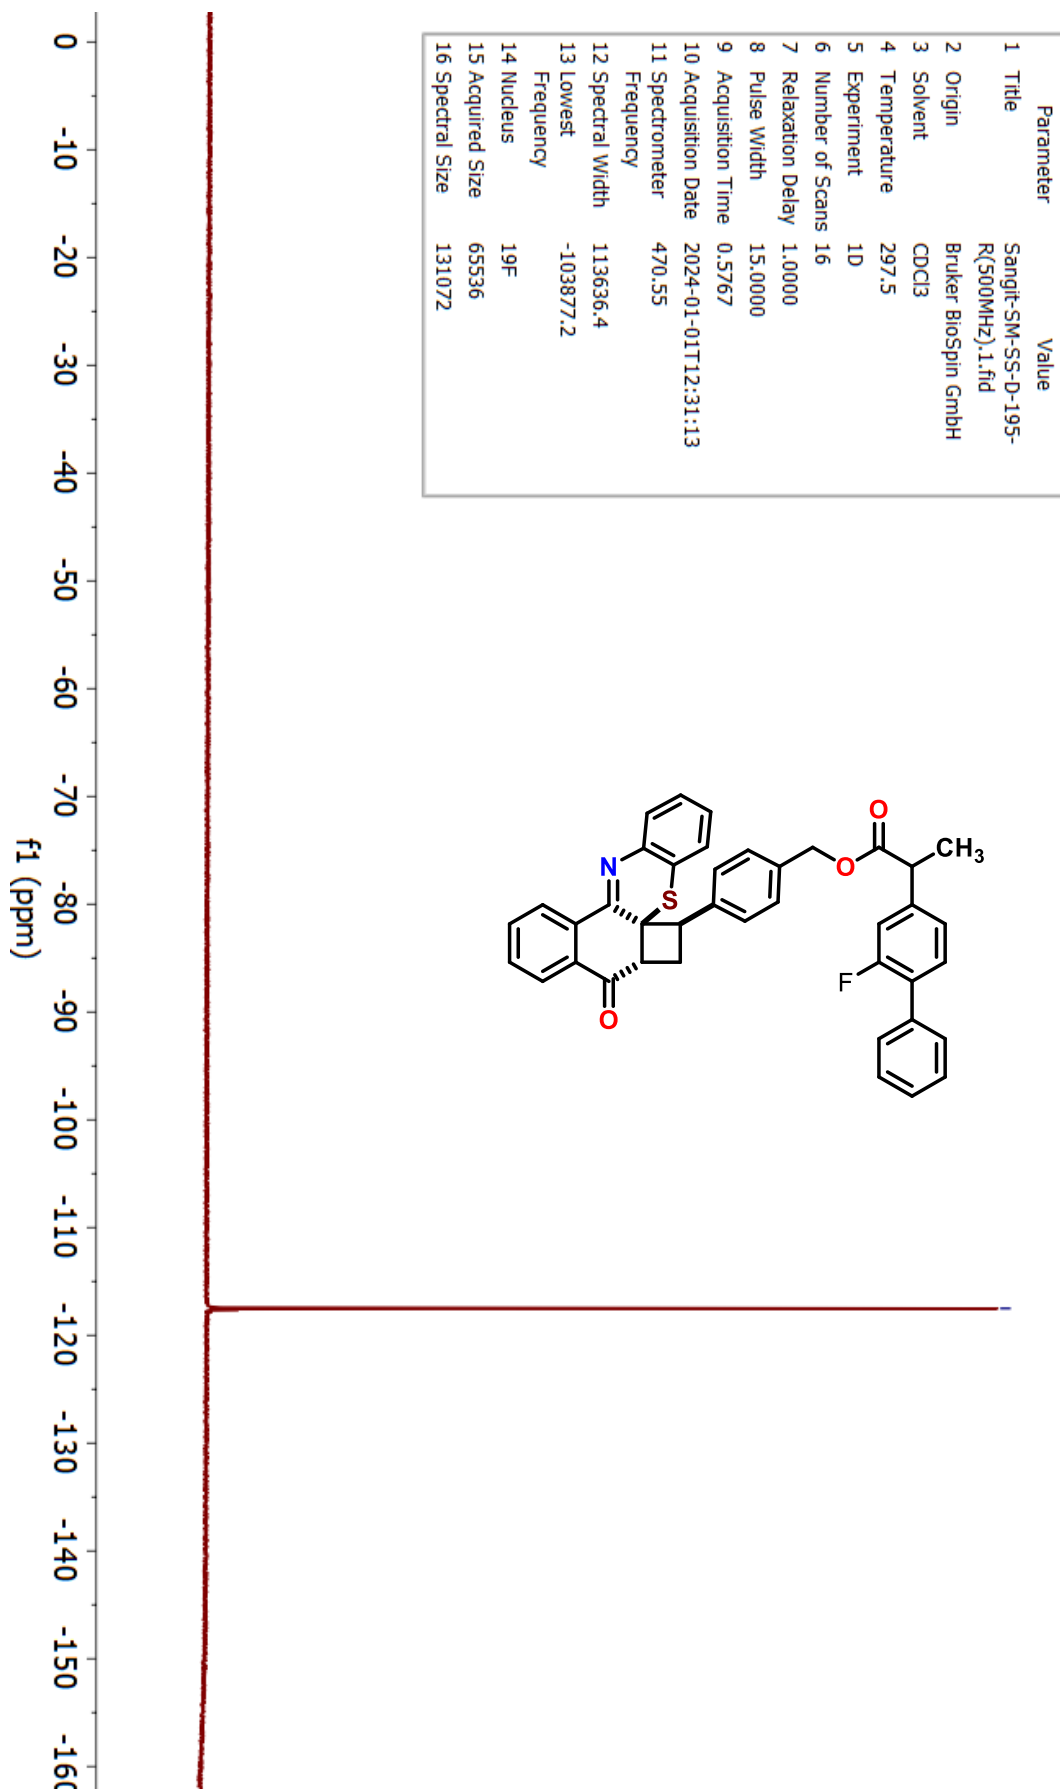

| Parameter                 | Value                              |
|---------------------------|------------------------------------|
| 1 Title                   | Sangit-SM-SS-D-195-R(500MHz);1.fid |
| 2 Origin                  | Bruker Biospin GmbH                |
| 3 Solvent                 | CDCl3                              |
| 4 Temperature             | 297.5                              |
| 5 Experiment              | 1D                                 |
| 6 Number of Scans         | 16                                 |
| 7 Relaxation Delay        | 1.0000                             |
| 8 Pulse Width             | 15.0000                            |
| 9 Acquisition Time        | 0.5767                             |
| 10 Acquisition Date       | 2024-01-01T12:31:13                |
| 11 Spectrometer Frequency | 470.55                             |
| 12 Spectral Width         | 113636.4                           |
| 13 Lowest Frequency       | -103877.2                          |
| 14 Nucleus                | $^{19}\text{F}$                    |
| 15 Acquired Size          | 65536                              |
| 16 Spectral Size          | 131072                             |

--117.50

<sup>1</sup>H NMR spectra of **2ao**

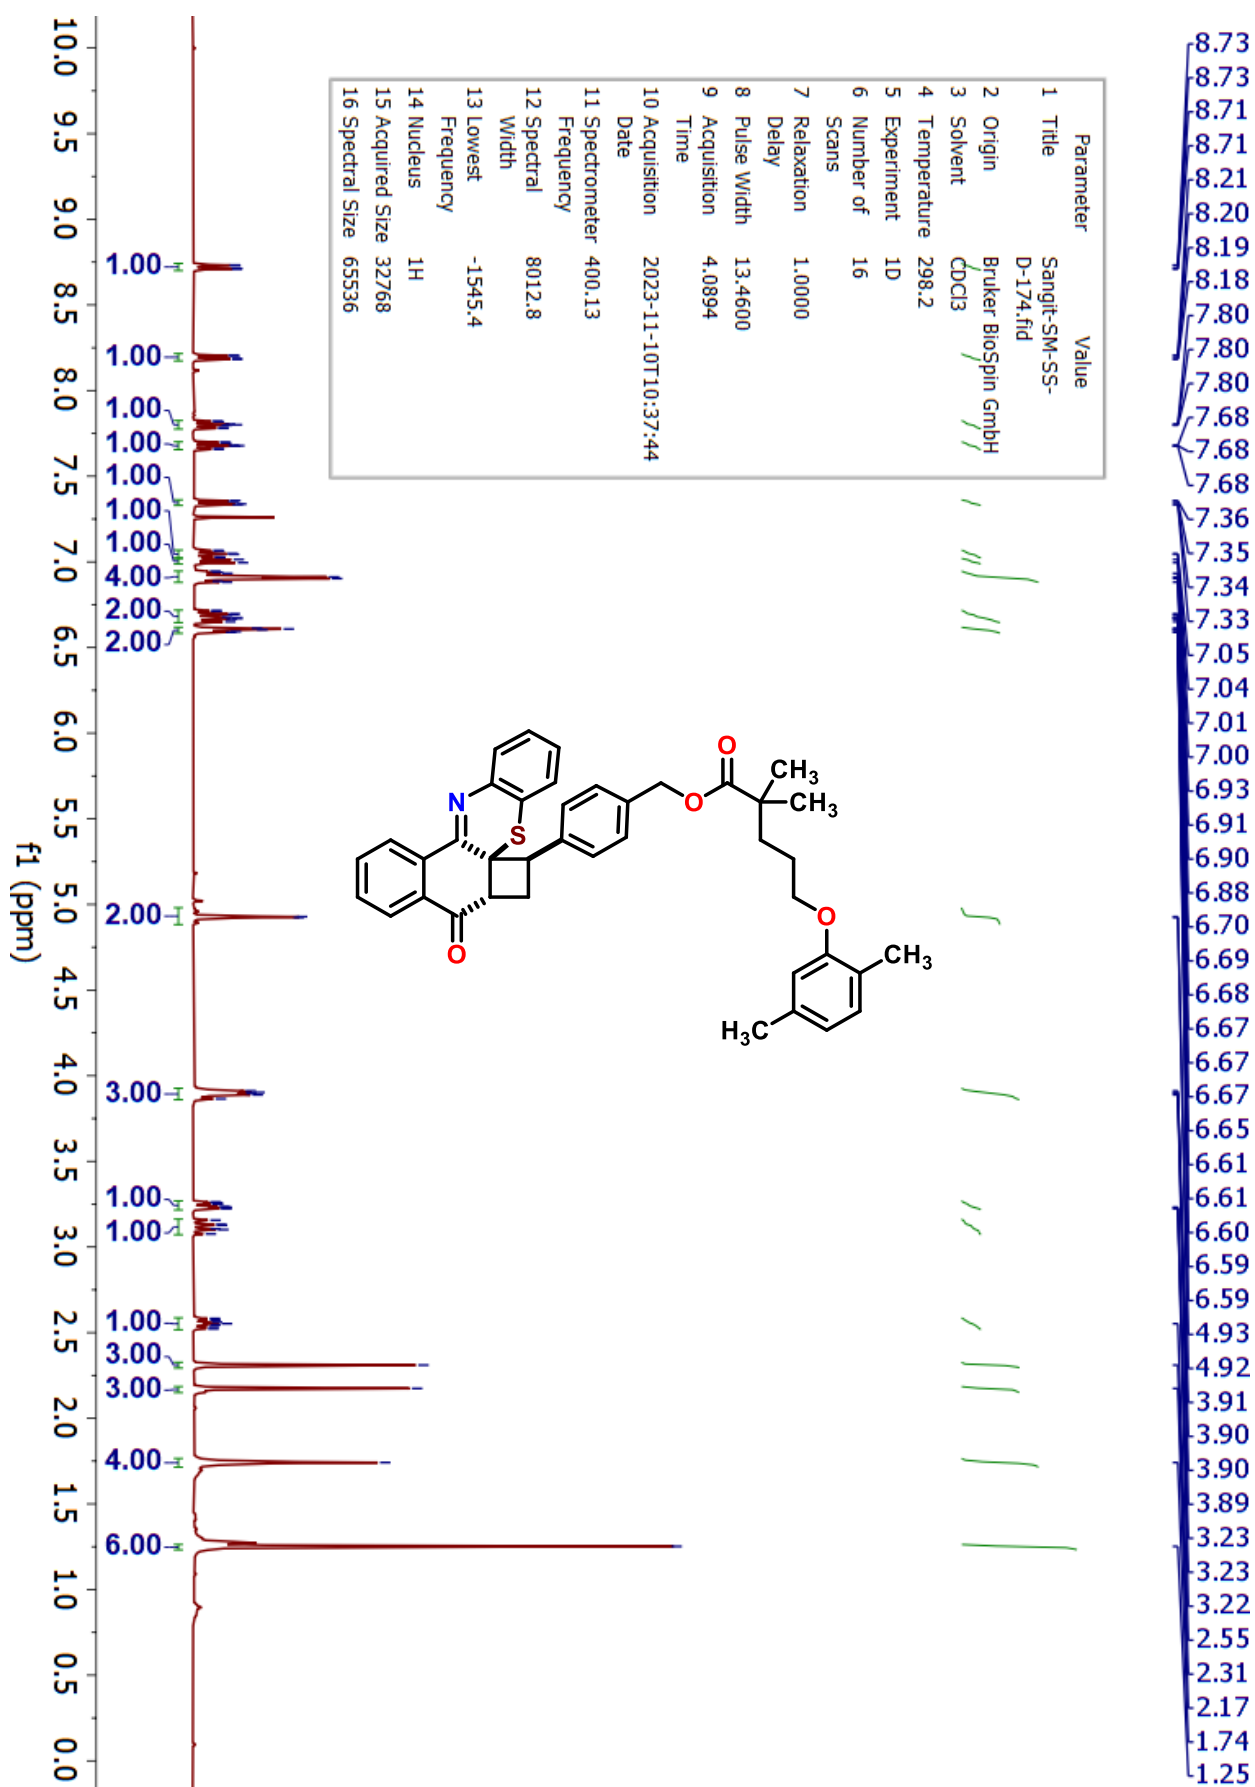

$^{13}\text{C}\{^1\text{H}\}$  NMR spectra of **2ao**

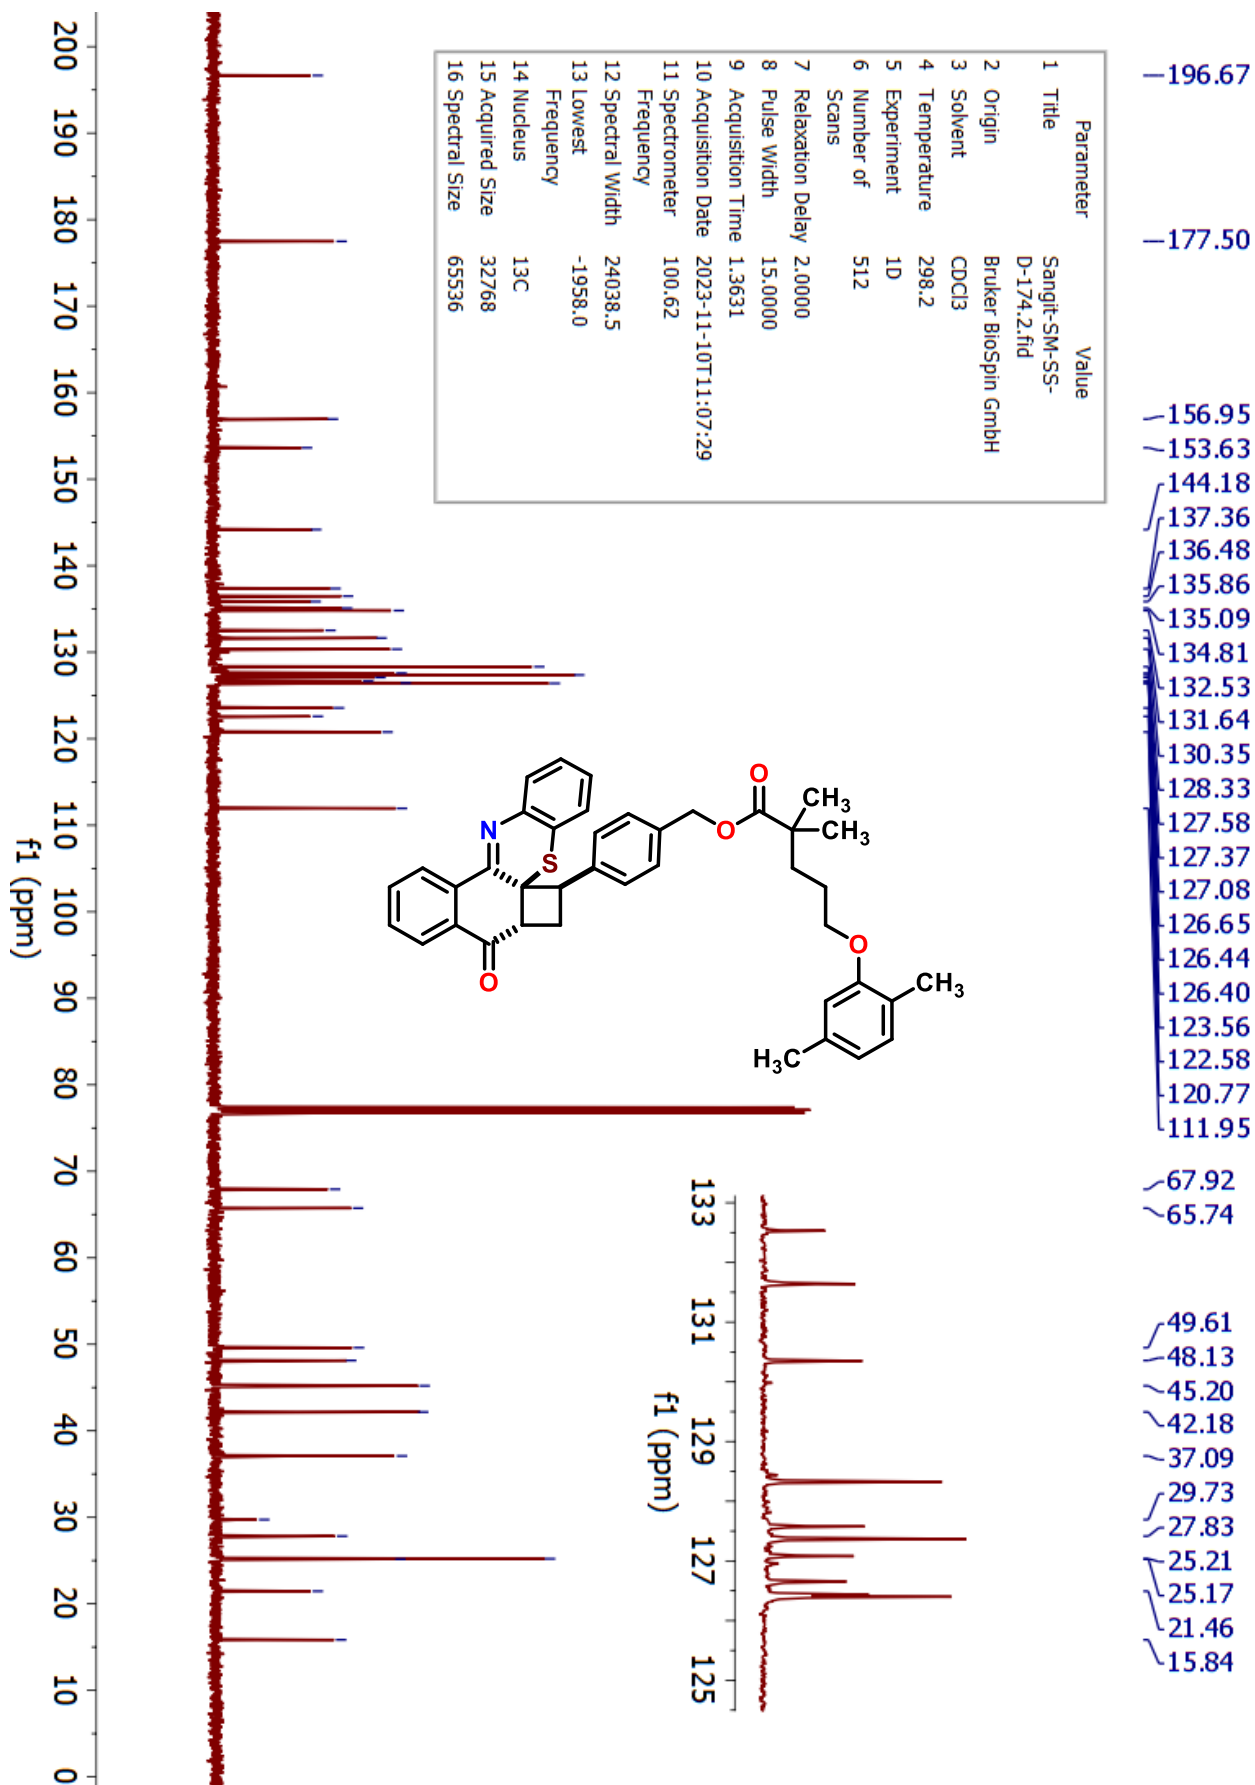

<sup>1</sup>H NMR spectra of **2ap**

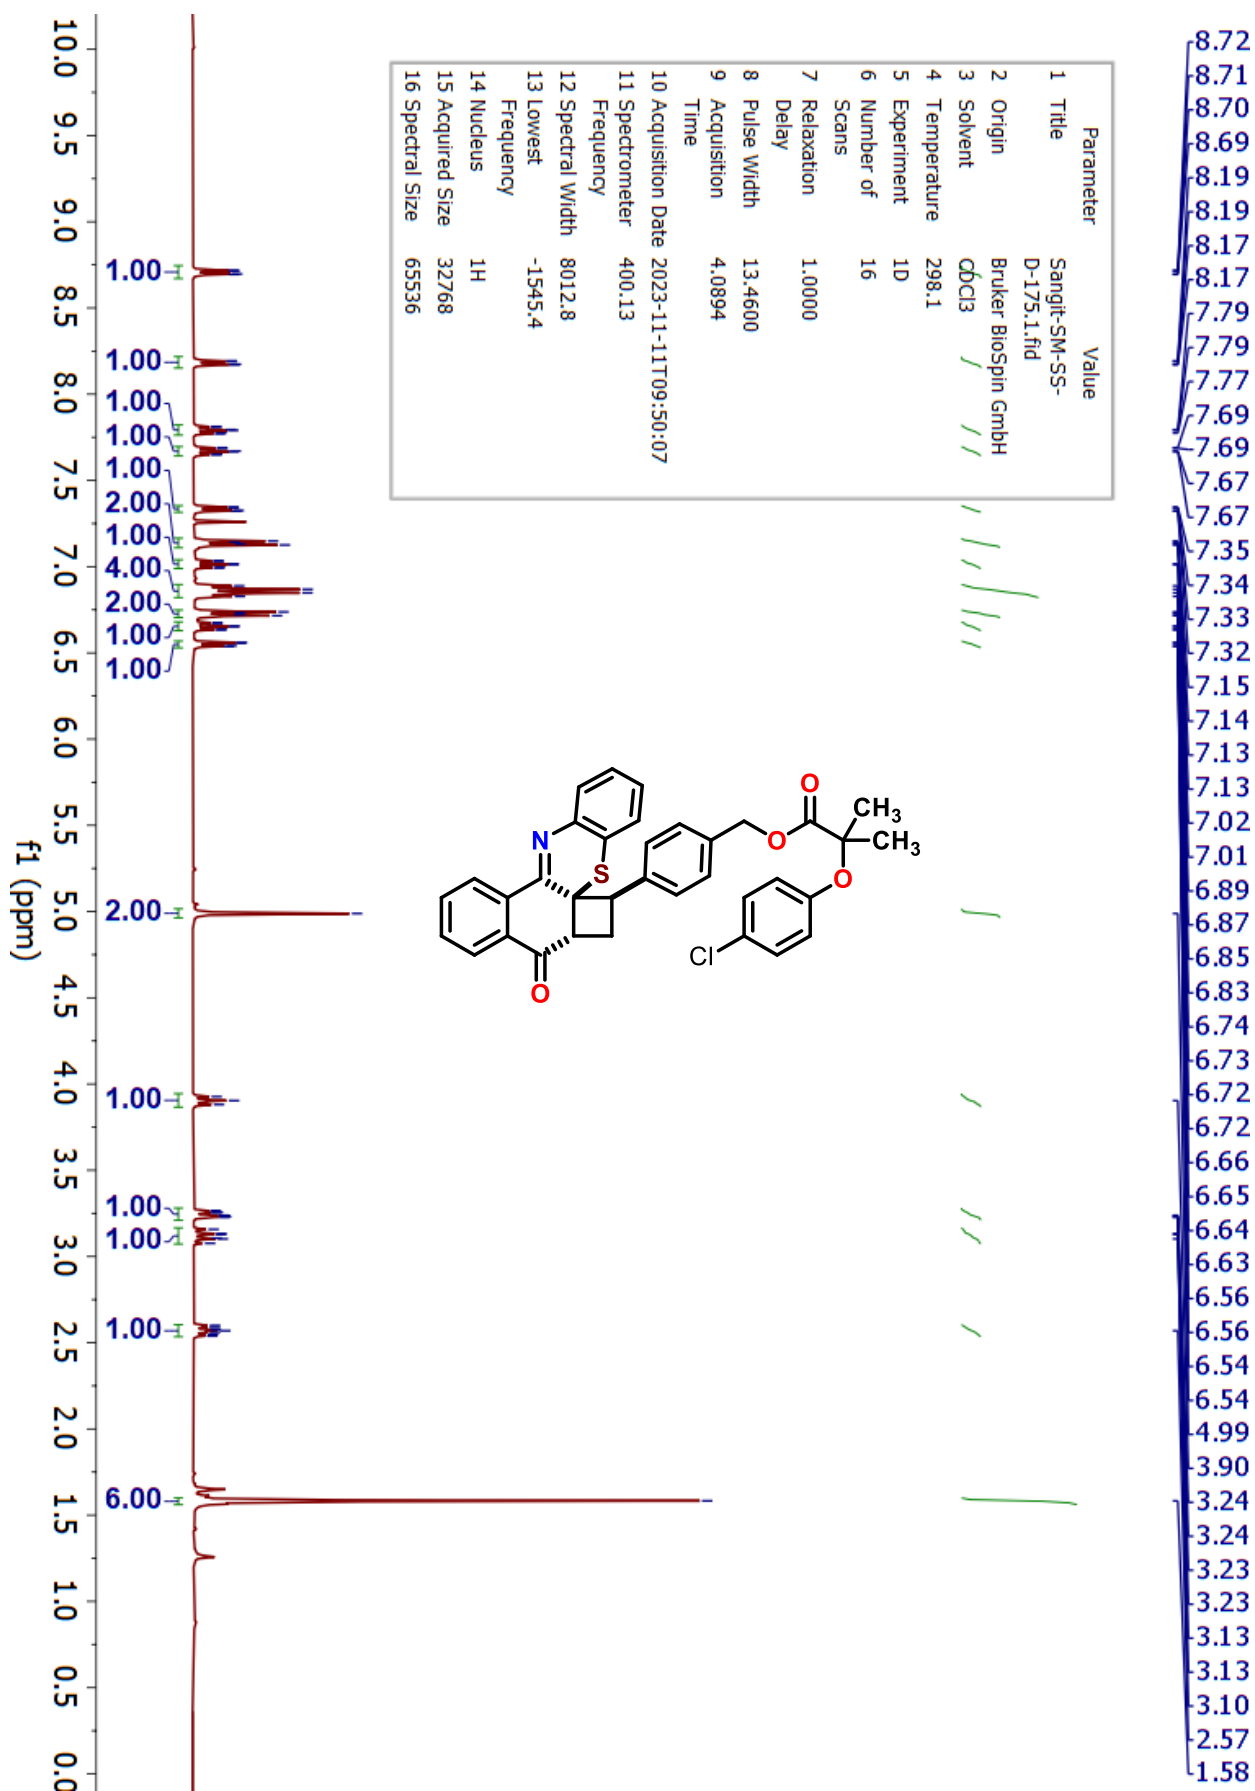

$^{13}\text{C}\{^1\text{H}\}$  NMR spectra of **2ap**

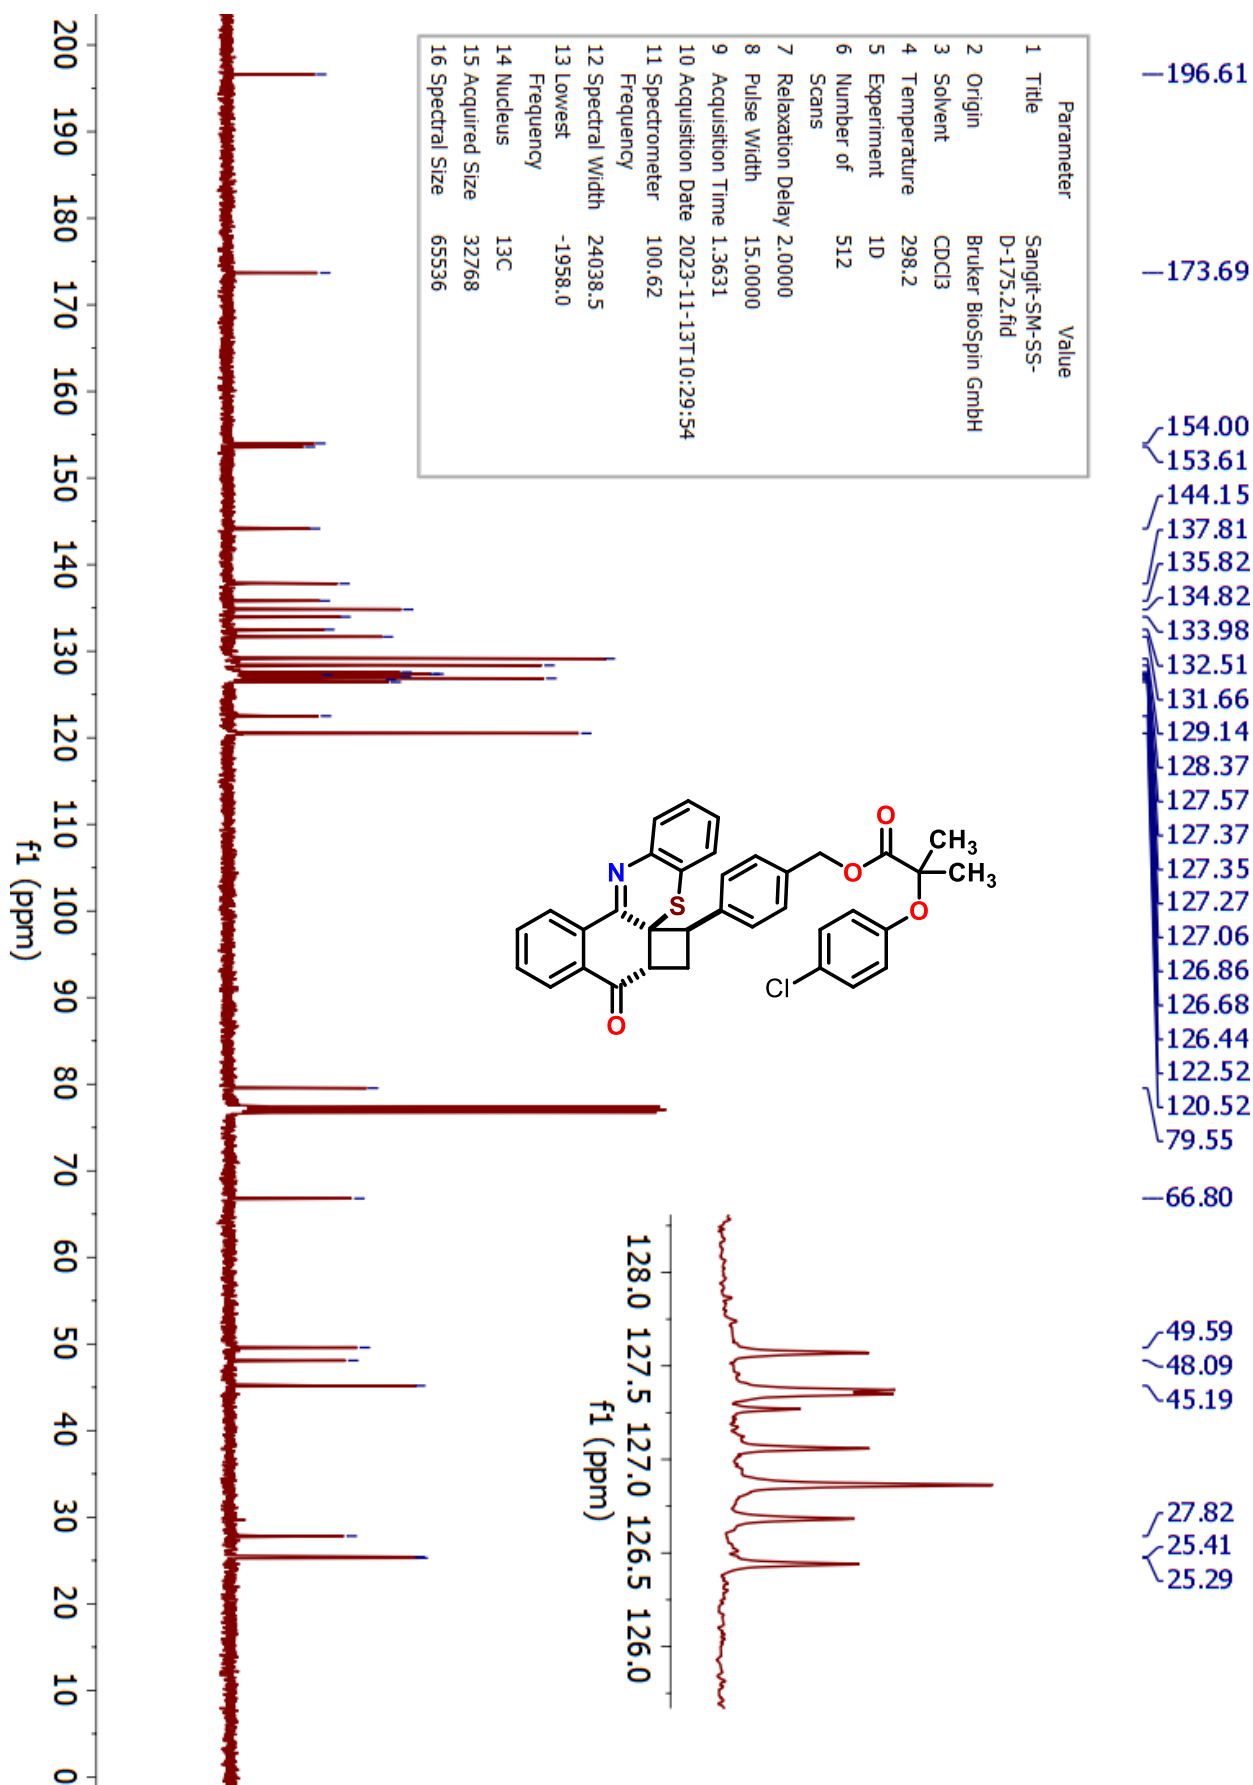

<sup>1</sup>H NMR spectra of **2aq**

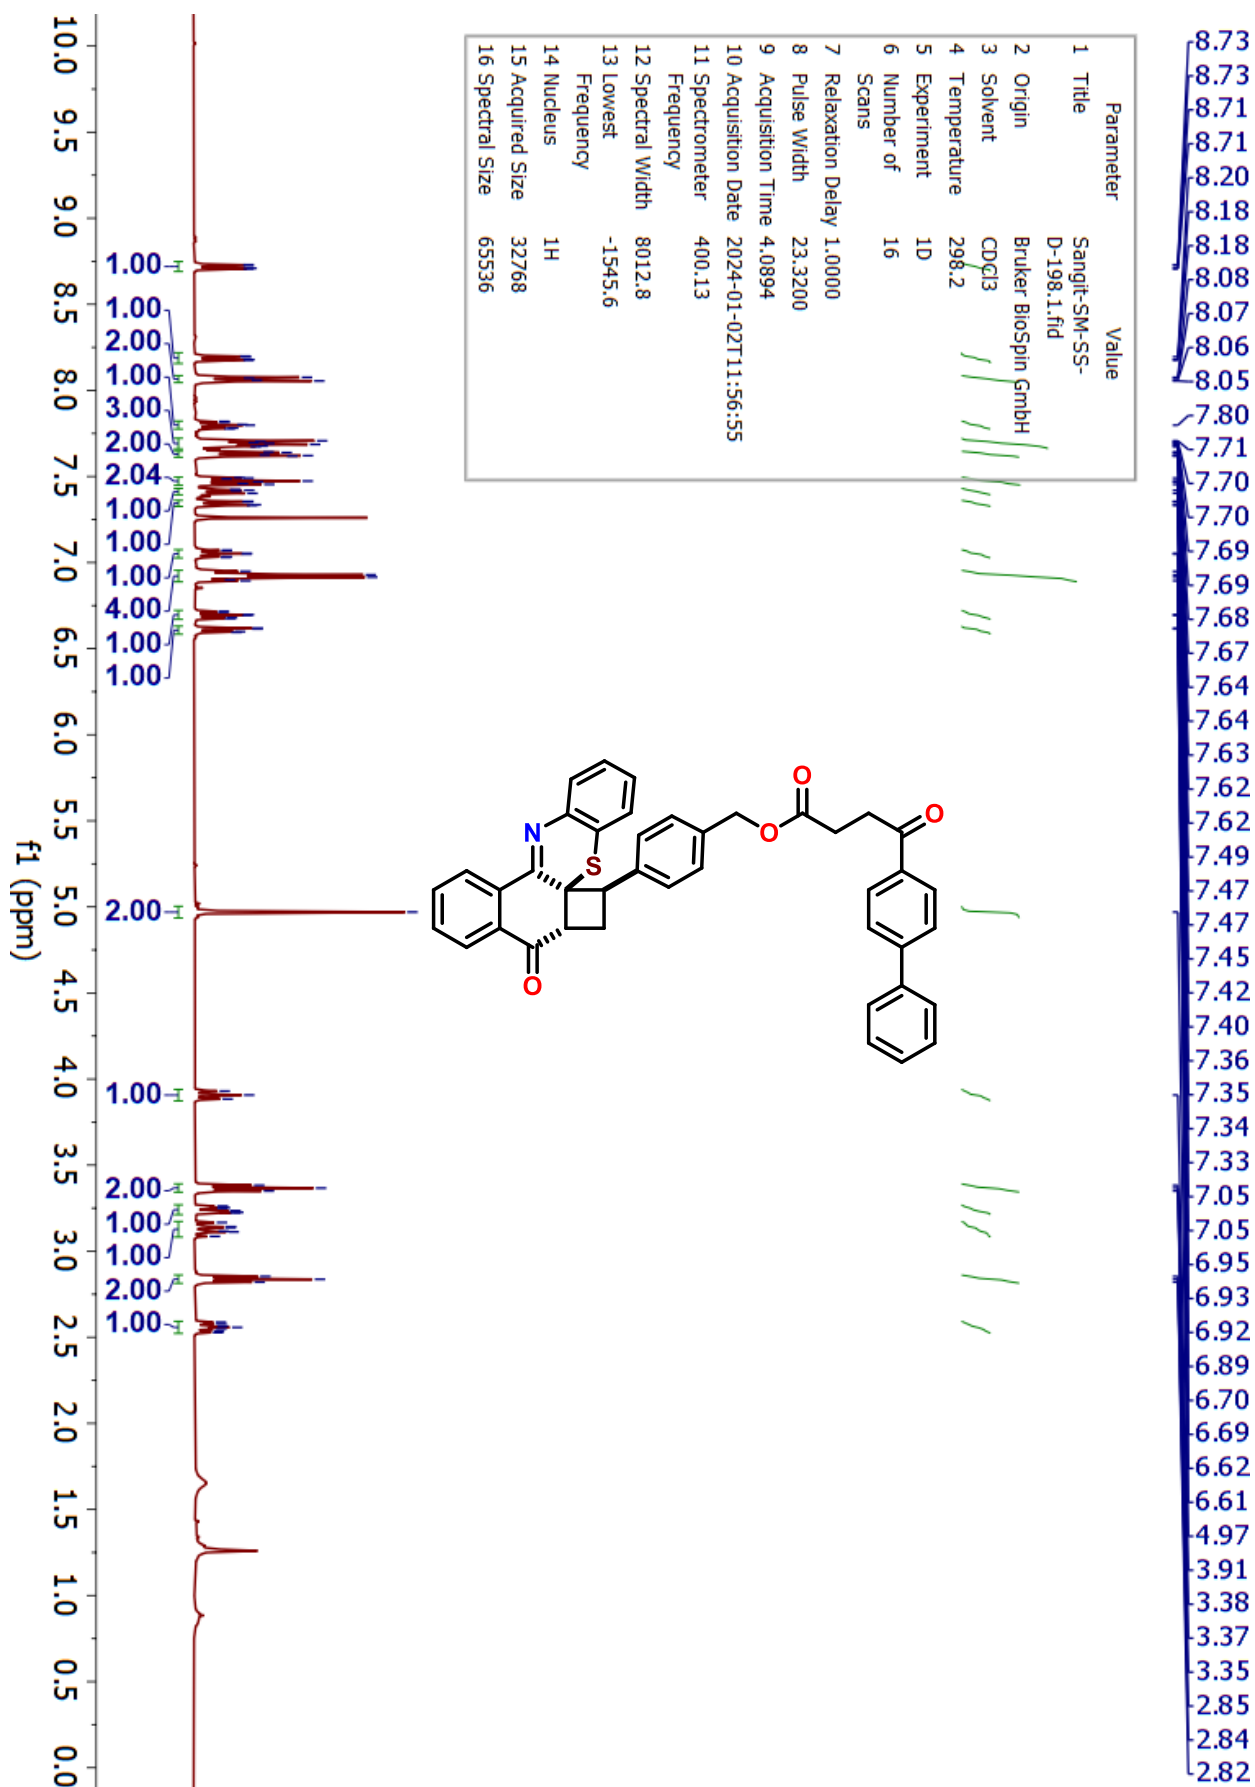



$^{13}\text{C}\{^1\text{H}\}$  NMR spectra of **2aq**

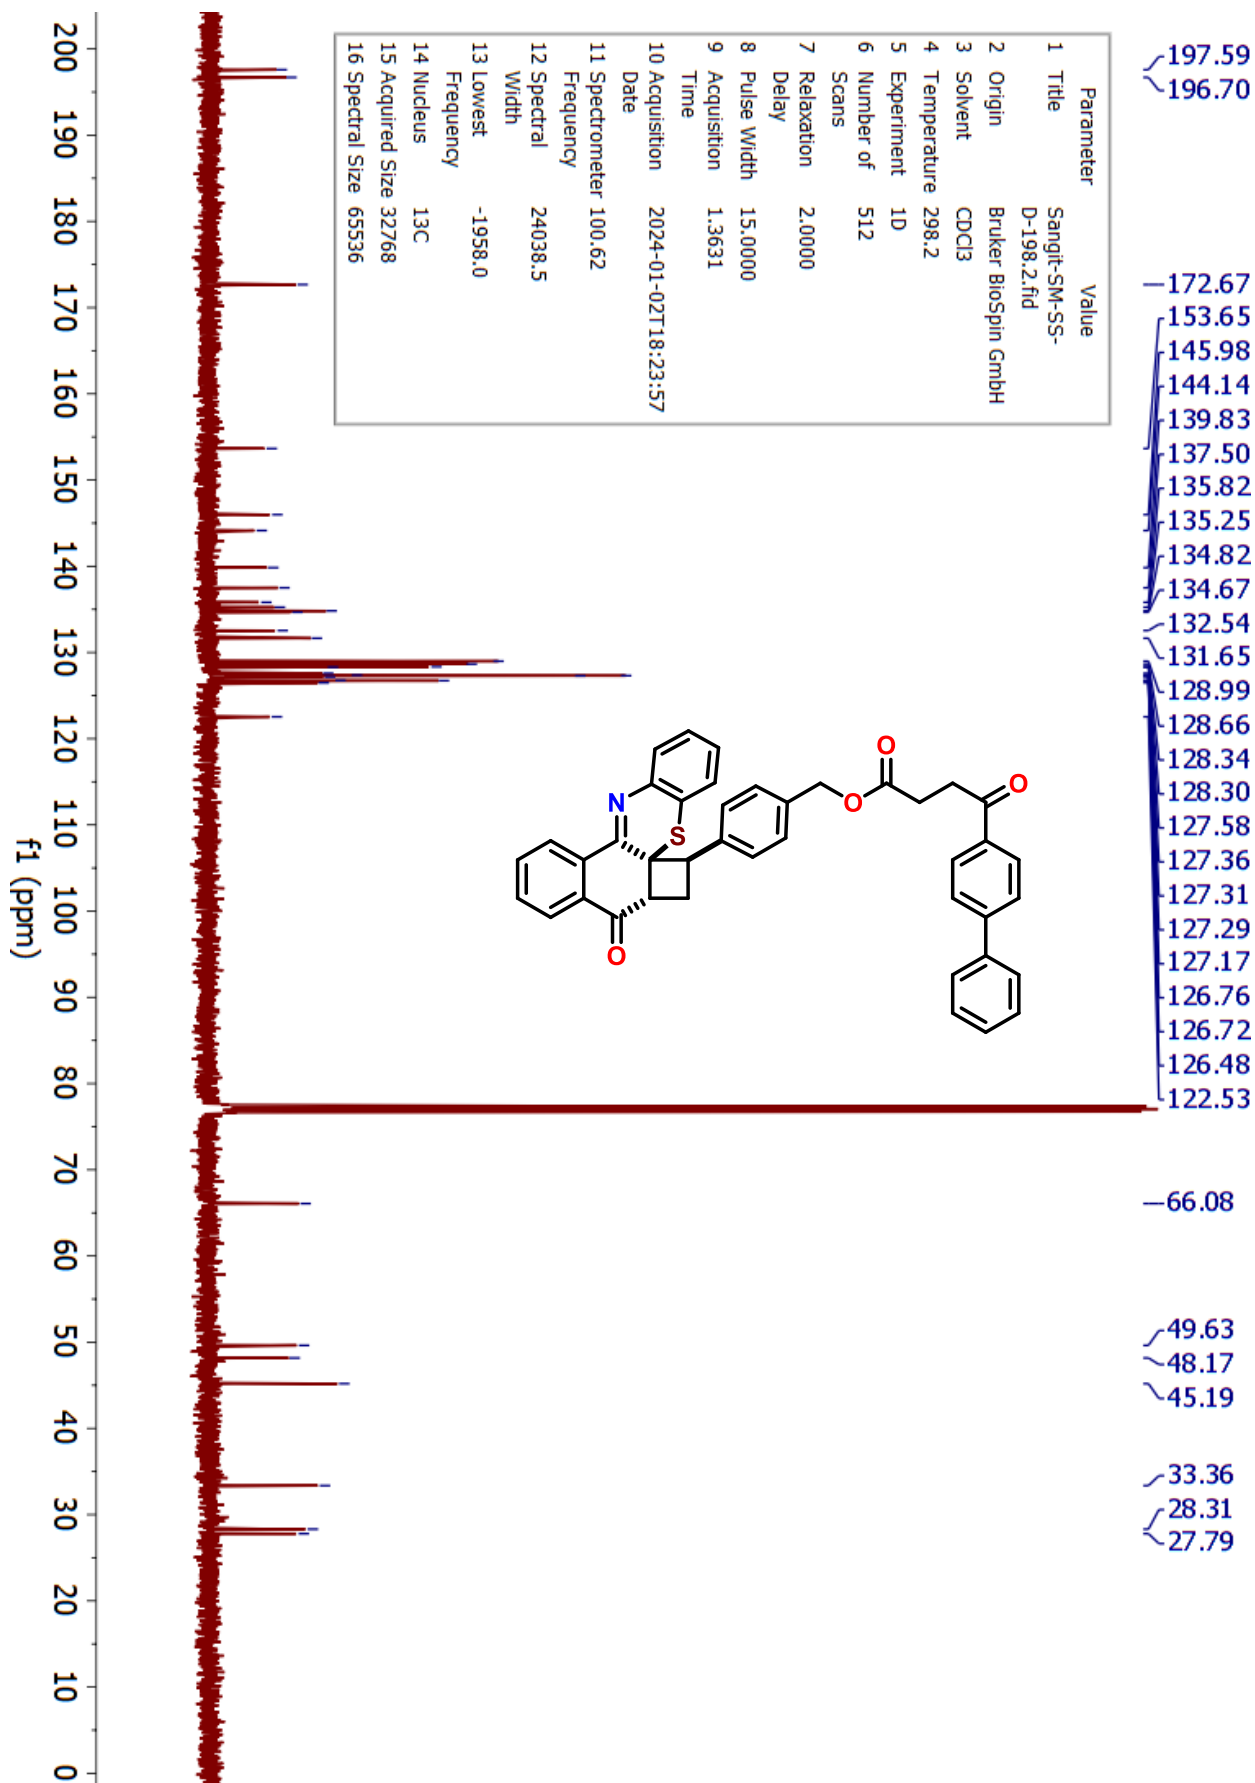

#### 14. Details X-ray Single-crystal Data of **2a**, **2o**, **2x**, **2y**, **2ad**, **2af**, **2ak** and **2al**

The structures of cyclobutylated phenothiazines **2a** (CCDC: 2332714), **2o** (CCDC: 2332712), **2x** (CCDC: 2403401), **2y** (CCDC: 2403402), **2ad** (CCDC: 2332711), **2af** (CCDC: 2403403), **2ak** (CCDC: 2332713), and **2al** (CCDC: 2403404) were confirmed by X-ray structure analysis. We isolated the suitable single crystals by the slow evaporation method of the solvents, namely, chloroform and dichloromethane. The cyclobutylated phenothiazine **2a** crystallizes in a monoclinic crystal system with a  $P2_1/n$  space group. Its crystal structure analysis further revealed that the plane of the cyclobutane ring in **2a** is almost perpendicular to the plane of the 1,4-thiazine ring, with a dihedral angle ( $\theta$ ) of  $82^\circ$  and also to the plane of the iminoquinone ring ( $\theta = 95.8^\circ$ ). This arranges the cyclobutane ring and the 1,4-thiazine ring in a spiro-like orientation containing a quaternary C-centre (**C1**) in between. The *para*-methylated-styrene coupled cyclobutylated phenothiazine **2o** crystallizes in a monoclinic crystal system with a  $P2_1/n$  space group as well. Cyclobutylated phenothiazines **2x** and **2y** crystallize in a monoclinic crystal system having  $P2_1/c$  and  $P2_1$  space groups, respectively. The cyclobutylated hexacyclic phenothiazine **2ad** crystallizes in a monoclinic crystal system with a  $P2_1/c$  space group. Cyclobutylated phenothiazines **2af** having cyclopropyl ring crystallizes in a monoclinic crystal system with  $P2_1/n$  space group. The reduced form of **2a**, where the carbonyl group was reduced to its corresponding alcohol **2ak**, was crystallized in a trigonal crystal system with an  $R\bar{3}$  space group. The oxidized form of **2a**, where the thio group was oxidized to its corresponding sulfoxide **2al**, was crystallized in an orthorhombic crystal system with a  $P2_12_12_1$  space group. Interestingly, crystal structure analysis revealed that there is a strong  $\pi - \pi$  interaction between the plane of the phenyl ring of styrene and the phenyl ring of benzothiazine in all of the synthesized cyclobutylated angular phenothiazines.

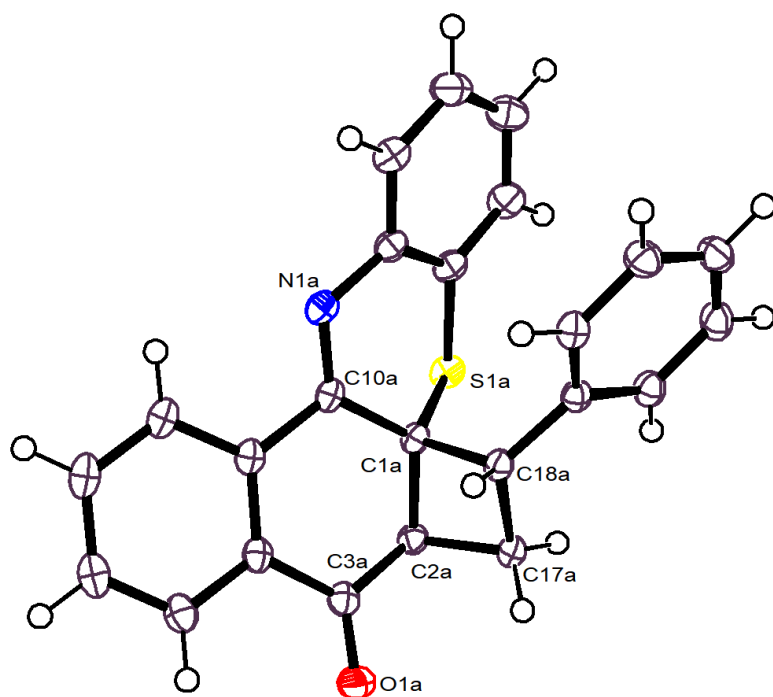

**Table S3. Crystal Data and Structure Refinement for 2a.**

|                                  |                         |
|----------------------------------|-------------------------|
| Identification code              | <b>2a</b>               |
| CCDC Number                      | <b>2332714</b>          |
| Empirical formula                | $C_{48}H_{34}N_2O_2S_2$ |
| Formula weight                   | 734.89                  |
| Temperature/K                    | 139(2)                  |
| Crystal system                   | monoclinic              |
| Space group                      | $P2_1/n$                |
| $a/\text{\AA}$                   | 11.7018(7)              |
| $b/\text{\AA}$                   | 13.6726(8)              |
| $c/\text{\AA}$                   | 21.9850(14)             |
| $\alpha/^\circ$                  | 90                      |
| $\beta/^\circ$                   | 91.133(3)               |
| $\gamma/^\circ$                  | 90                      |
| Volume/ $\text{\AA}^3$           | 3516.8(4)               |
| Z                                | 4                       |
| $\rho_{\text{calc}}/\text{cm}^3$ | 1.388                   |
| $\mu/\text{mm}^{-1}$             | 0.198                   |

|                                                  |                                                                        |
|--------------------------------------------------|------------------------------------------------------------------------|
| F(000)                                           | 1536.0                                                                 |
| Crystal size/mm <sup>3</sup>                     | 0.051 × 0.042 × 0.034                                                  |
| Radiation                                        | MoK $\alpha$ ( $\lambda$ = 0.71073)                                    |
| 2 $\Theta$ range for data collection/ $^{\circ}$ | 3.912 to 61.038                                                        |
| Index ranges                                     | -15 $\leq$ h $\leq$ 16, -19 $\leq$ k $\leq$ 19, -31 $\leq$ l $\leq$ 31 |
| Reflections collected                            | 92403                                                                  |
| Independent reflections                          | 10722 [R <sub>int</sub> = 0.0739, R <sub>sigma</sub> = 0.0418]         |
| Data/restraints/parameters                       | 10722/0/487                                                            |
| Goodness-of-fit on F <sup>2</sup>                | 1.032                                                                  |
| Final R indexes [I $\geq$ 2 $\sigma$ (I)]        | R <sub>1</sub> = 0.0458, wR <sub>2</sub> = 0.1164                      |
| Final R indexes [all data]                       | R <sub>1</sub> = 0.0656, wR <sub>2</sub> = 0.1310                      |
| Largest diff. peak/hole / e $\text{\AA}^{-3}$    | 0.90/-0.25                                                             |

**Table S4. Fractional Atomic Coordinates ( $\times 10^4$ ) and Equivalent Isotropic Displacement Parameters ( $\text{\AA}^2 \times 10^3$ ) for 2a.  $U_{eq}$  is defined as 1/3 of the trace of the orthogonalised  $U_{ij}$  tensor.**

| Atom | x          | y          | z         | U(eq)    |
|------|------------|------------|-----------|----------|
| S1   | 10559.6(3) | 5741.6(2)  | 2562.5(2) | 18.20(8) |
| O1   | 8745.3(9)  | 7912.5(8)  | 932.5(5)  | 25.1(2)  |
| N1   | 8087.7(9)  | 5004.9(8)  | 2565.0(5) | 19.4(2)  |
| C1   | 9316.6(10) | 6384.6(9)  | 2273.7(6) | 15.6(2)  |
| C2   | 9668.1(11) | 7053.8(10) | 1739.2(6) | 18.4(3)  |
| C3   | 8774.1(11) | 7172.0(10) | 1240.3(6) | 18.3(3)  |
| C4   | 7977.5(11) | 6347.8(10) | 1126.1(6) | 19.3(3)  |
| C5   | 7394.5(13) | 6307.8(11) | 563.4(7)  | 25.2(3)  |
| C6   | 6661.2(13) | 5540.6(12) | 428.7(7)  | 27.4(3)  |
| C7   | 6494.4(12) | 4807.3(11) | 858.2(7)  | 24.5(3)  |
| C8   | 7059.7(11) | 4840.4(10) | 1417.1(7) | 20.2(3)  |
| C9   | 7805.3(11) | 5614.6(10) | 1562.8(6) | 17.9(3)  |
| C10  | 8391.7(11) | 5636.5(9)  | 2165.0(6) | 16.7(2)  |

**Table S4. Fractional Atomic Coordinates ( $\times 10^4$ ) and Equivalent Isotropic Displacement Parameters ( $\text{\AA}^2 \times 10^3$ ) for 2a.  $U_{\text{eq}}$  is defined as 1/3 of the trace of the orthogonalised  $U_{\text{IJ}}$  tensor.**

| Atom | $x$         | $y$         | $z$       | $U(\text{eq})$ |
|------|-------------|-------------|-----------|----------------|
| C11  | 8724.4(11)  | 4897.4(10)  | 3109.6(6) | 18.8(3)        |
| C12  | 8200.1(13)  | 4428.3(11)  | 3596.5(7) | 24.8(3)        |
| C13  | 8803.7(14)  | 4222.6(12)  | 4126.4(7) | 30.4(3)        |
| C14  | 9962.3(14)  | 4460.9(12)  | 4175.8(8) | 30.1(3)        |
| C15  | 10498.1(12) | 4921.0(11)  | 3699.2(7) | 24.3(3)        |
| C16  | 9886.7(11)  | 5152.9(9)   | 3166.9(6) | 18.6(3)        |
| C17  | 9736.4(13)  | 7932.2(10)  | 2181.5(6) | 23.3(3)        |
| C18  | 9019.8(11)  | 7349.4(9)   | 2642.9(6) | 17.7(3)        |
| C19  | 9301.7(11)  | 7395.2(10)  | 3311.9(6) | 18.1(3)        |
| C20  | 8504.8(12)  | 7065.0(11)  | 3730.5(7) | 23.8(3)        |
| C21  | 8773.1(15)  | 7043.4(12)  | 4347.8(7) | 29.8(3)        |
| C22  | 9826.0(15)  | 7377.9(12)  | 4561.7(7) | 31.0(3)        |
| C23  | 10618.1(14) | 7717.9(11)  | 4152.4(7) | 26.6(3)        |
| C24  | 10362.7(12) | 7724.2(10)  | 3532.8(6) | 20.6(3)        |
| S1A  | 9379.1(3)   | 12612.5(3)  | 2404.8(2) | 20.00(9)       |
| O1A  | 11159.6(9)  | 10429.0(8)  | 4038.7(5) | 27.2(2)        |
| N1A  | 11834.9(10) | 13403.3(8)  | 2443.6(5) | 20.1(2)        |
| C1A  | 10623.3(10) | 11999.5(10) | 2717.1(6) | 16.4(2)        |
| C2A  | 10250.4(11) | 11323.2(10) | 3241.9(6) | 18.1(3)        |
| C3A  | 11154.3(11) | 11173.3(10) | 3735.5(6) | 19.5(3)        |
| C4A  | 11996.2(11) | 11968.8(10) | 3846.5(6) | 18.6(3)        |
| C5A  | 12644.4(12) | 11942.6(11) | 4388.3(7) | 23.2(3)        |
| C6A  | 13414.5(13) | 12682.6(12) | 4526.2(7) | 26.3(3)        |
| C7A  | 13536.4(12) | 13464.3(11) | 4124.9(7) | 25.4(3)        |
| C8A  | 12914.8(11) | 13488.7(10) | 3582.6(7) | 21.4(3)        |

**Table S4. Fractional Atomic Coordinates ( $\times 10^4$ ) and Equivalent Isotropic Displacement Parameters ( $\text{\AA}^2 \times 10^3$ ) for 2a.  $U_{\text{eq}}$  is defined as 1/3 of the trace of the orthogonalised  $U_{\text{ij}}$  tensor.**

| Atom | <i>x</i>    | <i>y</i>    | <i>z</i>  | $U_{\text{eq}}$ |
|------|-------------|-------------|-----------|-----------------|
| C9A  | 12146.4(11) | 12735.8(10) | 3429.5(6) | 18.3(3)         |
| C10A | 11535.5(11) | 12756.2(9)  | 2834.8(6) | 17.2(2)         |
| C11A | 11212.1(11) | 13523.7(10) | 1895.0(6) | 19.6(3)         |
| C12A | 11738.2(13) | 14039.1(11) | 1429.1(7) | 24.2(3)         |
| C13A | 11140.1(14) | 14270.4(11) | 897.9(7)  | 28.8(3)         |
| C14A | 9997.7(14)  | 13996.7(12) | 829.0(8)  | 31.3(3)         |
| C15A | 9464.3(12)  | 13480.2(11) | 1284.3(7) | 25.8(3)         |
| C16A | 10062.4(11) | 13236.0(10) | 1817.5(7) | 20.1(3)         |
| C17A | 10185.4(12) | 10459.3(10) | 2787.2(6) | 21.4(3)         |
| C18A | 10972.7(11) | 11040.3(9)  | 2360.3(6) | 17.1(2)         |
| C19A | 10824.6(11) | 11005.6(9)  | 1682.5(6) | 17.6(3)         |
| C20A | 9790.4(12)  | 10742.6(10) | 1398.5(7) | 21.5(3)         |
| C21A | 9669.0(13)  | 10776.3(11) | 770.1(7)  | 26.1(3)         |
| C22A | 10578.3(14) | 11069.0(11) | 414.0(7)  | 26.9(3)         |
| C23A | 11607.7(13) | 11324.6(11) | 691.5(7)  | 25.7(3)         |
| C24A | 11731.9(12) | 11292.3(10) | 1319.7(7) | 21.5(3)         |

**Table S5. Anisotropic Displacement Parameters ( $\text{\AA}^2 \times 10^3$ ) for 2a. The Anisotropic displacement factor exponent takes the form:  $-2\pi^2[h^2a^*{}^2U_{11}+2hka^*b^*U_{12}+\dots]$ .**

| Atom | $U_{11}$  | $U_{22}$  | $U_{33}$  | $U_{23}$ | $U_{13}$ | $U_{12}$ |
|------|-----------|-----------|-----------|----------|----------|----------|
| S1   | 13.83(14) | 18.50(16) | 22.33(17) | 0.18(12) | 1.68(12) | 1.60(11) |
| O1   | 28.3(5)   | 23.7(5)   | 23.1(5)   | 4.6(4)   | -0.8(4)  | -1.9(4)  |
| N1   | 17.2(5)   | 17.7(5)   | 23.4(6)   | 0.7(4)   | -0.5(4)  | -1.5(4)  |
| C1   | 13.2(5)   | 16.5(6)   | 17.2(6)   | -0.7(5)  | 0.1(4)   | -0.7(4)  |
| C2   | 17.4(6)   | 19.1(6)   | 18.8(6)   | 0.9(5)   | -0.1(5)  | -3.1(5)  |

**Table S5. Anisotropic Displacement Parameters ( $\text{\AA}^2 \times 10^3$ ) for 2a. The Anisotropic displacement factor exponent takes the form:  $-2\pi^2[h^2a^{*2}U_{11}+2hka^*b^*U_{12}+\dots]$ .**

| Atom | U <sub>11</sub> | U <sub>22</sub> | U <sub>33</sub> | U <sub>23</sub> | U <sub>13</sub> | U <sub>12</sub> |
|------|-----------------|-----------------|-----------------|-----------------|-----------------|-----------------|
| C3   | 17.5(6)         | 20.2(6)         | 17.2(6)         | -1.0(5)         | 2.5(5)          | -0.4(5)         |
| C4   | 17.9(6)         | 21.2(6)         | 18.8(6)         | -2.6(5)         | 0.3(5)          | 0.7(5)          |
| C5   | 26.3(7)         | 29.5(8)         | 19.6(7)         | -1.5(6)         | -2.5(5)         | -1.4(6)         |
| C6   | 26.8(7)         | 32.7(8)         | 22.5(7)         | -7.4(6)         | -4.8(6)         | -1.5(6)         |
| C7   | 20.4(6)         | 24.9(7)         | 27.9(8)         | -9.4(6)         | -2.9(5)         | -1.9(5)         |
| C8   | 17.7(6)         | 18.5(6)         | 24.3(7)         | -3.8(5)         | 0.6(5)          | -0.8(5)         |
| C9   | 14.9(5)         | 18.7(6)         | 20.1(6)         | -3.9(5)         | 0.4(5)          | 0.6(5)          |
| C10  | 14.6(5)         | 15.5(6)         | 19.9(6)         | -1.5(5)         | 0.3(5)          | 0.4(4)          |
| C11  | 19.3(6)         | 15.8(6)         | 21.2(7)         | 0.5(5)          | -0.4(5)         | -0.3(5)         |
| C12  | 22.7(7)         | 23.3(7)         | 28.5(8)         | 5.8(6)          | 1.1(6)          | -2.1(5)         |
| C13  | 32.5(8)         | 32.1(8)         | 26.7(8)         | 11.4(6)         | 2.3(6)          | -2.4(6)         |
| C14  | 31.1(8)         | 29.9(8)         | 29.2(8)         | 9.2(6)          | -5.4(6)         | 1.0(6)          |
| C15  | 21.4(6)         | 22.5(7)         | 28.7(8)         | 2.8(6)          | -4.4(6)         | 2.7(5)          |
| C16  | 18.5(6)         | 14.9(6)         | 22.5(7)         | 0.4(5)          | 0.6(5)          | 1.8(5)          |
| C17  | 32.2(7)         | 17.9(6)         | 19.7(7)         | 1.1(5)          | -3.1(6)         | -7.0(6)         |
| C18  | 17.0(6)         | 14.9(6)         | 21.0(6)         | -1.6(5)         | -1.9(5)         | 0.2(4)          |
| C19  | 18.2(6)         | 15.2(6)         | 21.0(7)         | -1.7(5)         | 0.9(5)          | 2.6(5)          |
| C20  | 22.8(6)         | 20.5(7)         | 28.3(8)         | -2.6(6)         | 5.6(6)          | 1.8(5)          |
| C21  | 39.0(8)         | 25.5(8)         | 25.4(8)         | 0.8(6)          | 12.1(6)         | 3.3(6)          |
| C22  | 47.4(10)        | 25.4(8)         | 20.2(7)         | 0.3(6)          | -1.0(7)         | 6.8(7)          |
| C23  | 30.5(7)         | 25.1(7)         | 23.8(7)         | -1.7(6)         | -6.8(6)         | 3.2(6)          |
| C24  | 20.2(6)         | 20.2(6)         | 21.3(7)         | -1.6(5)         | -0.3(5)         | 0.9(5)          |
| S1A  | 13.64(15)       | 19.58(17)       | 26.84(19)       | 0.85(13)        | 1.91(12)        | 1.93(11)        |
| O1A  | 29.4(5)         | 25.1(5)         | 26.8(6)         | 5.7(4)          | -2.5(4)         | -4.3(4)         |
| N1A  | 18.0(5)         | 18.0(5)         | 24.4(6)         | -0.5(4)         | 1.2(4)          | -1.4(4)         |
| C1A  | 13.7(5)         | 16.4(6)         | 19.3(6)         | -0.9(5)         | 0.7(4)          | -0.7(4)         |

**Table S5. Anisotropic Displacement Parameters ( $\text{\AA}^2 \times 10^3$ ) for 2a. The Anisotropic displacement factor exponent takes the form:  $-2\pi^2[h^2a^*^2U_{11}+2hka^*b^*U_{12}+\dots]$ .**

| Atom | U <sub>11</sub> | U <sub>22</sub> | U <sub>33</sub> | U <sub>23</sub> | U <sub>13</sub> | U <sub>12</sub> |
|------|-----------------|-----------------|-----------------|-----------------|-----------------|-----------------|
| C2A  | 16.3(6)         | 18.5(6)         | 19.4(6)         | 0.2(5)          | 1.5(5)          | -3.0(5)         |
| C3A  | 18.8(6)         | 22.0(7)         | 17.8(6)         | -2.1(5)         | 3.3(5)          | -1.2(5)         |
| C4A  | 16.6(6)         | 20.5(6)         | 18.8(6)         | -3.9(5)         | 1.9(5)          | -0.5(5)         |
| C5A  | 22.1(6)         | 26.8(7)         | 20.7(7)         | -2.5(5)         | 0.6(5)          | -0.1(5)         |
| C6A  | 23.4(7)         | 32.3(8)         | 23.1(7)         | -8.1(6)         | -2.3(6)         | -0.7(6)         |
| C7A  | 19.6(6)         | 26.1(7)         | 30.4(8)         | -9.6(6)         | -1.2(6)         | -2.4(5)         |
| C8A  | 16.9(6)         | 19.3(6)         | 27.9(7)         | -5.6(5)         | 1.8(5)          | -1.0(5)         |
| C9A  | 15.3(6)         | 18.7(6)         | 21.1(7)         | -4.3(5)         | 1.0(5)          | 1.1(5)          |
| C10A | 14.7(5)         | 16.2(6)         | 20.8(6)         | -3.3(5)         | 1.3(5)          | -0.8(4)         |
| C11A | 20.1(6)         | 15.4(6)         | 23.4(7)         | -0.4(5)         | 1.8(5)          | 1.6(5)          |
| C12A | 23.6(7)         | 20.9(7)         | 28.2(8)         | 1.1(6)          | 2.5(6)          | -1.2(5)         |
| C13A | 34.5(8)         | 25.8(8)         | 26.4(8)         | 5.4(6)          | 4.1(6)          | 1.2(6)          |
| C14A | 35.2(8)         | 28.1(8)         | 30.4(8)         | 7.1(6)          | -4.8(7)         | 4.4(7)          |
| C15A | 21.6(7)         | 23.5(7)         | 32.3(8)         | 2.9(6)          | -3.6(6)         | 3.2(5)          |
| C16A | 19.5(6)         | 15.1(6)         | 25.6(7)         | 0.4(5)          | 2.0(5)          | 2.9(5)          |
| C17A | 26.7(7)         | 18.4(6)         | 19.0(6)         | -1.0(5)         | -0.9(5)         | -5.8(5)         |
| C18A | 16.9(6)         | 15.4(6)         | 19.1(6)         | -1.7(5)         | -0.9(5)         | 0.3(5)          |
| C19A | 17.7(6)         | 15.2(6)         | 20.0(6)         | -1.3(5)         | -1.2(5)         | 2.4(5)          |
| C20A | 19.1(6)         | 21.1(7)         | 24.2(7)         | -1.7(5)         | -2.1(5)         | 0.1(5)          |
| C21A | 26.9(7)         | 24.2(7)         | 26.9(8)         | -3.0(6)         | -9.3(6)         | 1.6(6)          |
| C22A | 36.0(8)         | 24.1(7)         | 20.4(7)         | -0.2(6)         | -3.8(6)         | 5.3(6)          |
| C23A | 28.7(7)         | 26.2(7)         | 22.3(7)         | 0.0(6)          | 5.0(6)          | 0.0(6)          |
| C24A | 19.7(6)         | 21.0(7)         | 23.8(7)         | -3.2(5)         | -1.1(5)         | 0.4(5)          |



**Table S6. Bond Lengths for 2a.**

| Atom | Atom | Length/Å   | Atom | Atom | Length/Å   |
|------|------|------------|------|------|------------|
| S1   | C1   | 1.8042(13) | S1A  | C1A  | 1.8039(13) |
| S1   | C16  | 1.7536(14) | S1A  | C16A | 1.7532(15) |
| O1   | C3   | 1.2177(17) | O1A  | C3A  | 1.2165(17) |
| N1   | C10  | 1.2876(17) | N1A  | C10A | 1.2873(18) |
| N1   | C11  | 1.4054(17) | N1A  | C11A | 1.4065(17) |
| C1   | C2   | 1.5512(18) | C1A  | C2A  | 1.5481(18) |
| C1   | C10  | 1.5048(17) | C1A  | C10A | 1.5053(17) |
| C1   | C18  | 1.5907(18) | C1A  | C18A | 1.5859(18) |
| C2   | C3   | 1.5095(18) | C2A  | C3A  | 1.5141(18) |
| C2   | C17  | 1.5464(19) | C2A  | C17A | 1.5483(19) |
| C3   | C4   | 1.4808(18) | C3A  | C4A  | 1.4844(18) |
| C4   | C5   | 1.4020(18) | C4A  | C5A  | 1.3998(18) |
| C4   | C9   | 1.4052(19) | C4A  | C9A  | 1.4063(19) |
| C5   | C6   | 1.384(2)   | C5A  | C6A  | 1.385(2)   |
| C6   | C7   | 1.394(2)   | C6A  | C7A  | 1.395(2)   |
| C7   | C8   | 1.3846(19) | C7A  | C8A  | 1.385(2)   |
| C8   | C9   | 1.4048(18) | C8A  | C9A  | 1.4034(18) |
| C9   | C10  | 1.4794(18) | C9A  | C10A | 1.4778(18) |
| C11  | C12  | 1.400(2)   | C11A | C12A | 1.396(2)   |
| C11  | C16  | 1.4074(18) | C11A | C16A | 1.4088(18) |
| C12  | C13  | 1.379(2)   | C12A | C13A | 1.386(2)   |
| C13  | C14  | 1.397(2)   | C13A | C14A | 1.394(2)   |
| C14  | C15  | 1.383(2)   | C14A | C15A | 1.384(2)   |
| C15  | C16  | 1.3960(19) | C15A | C16A | 1.394(2)   |
| C17  | C18  | 1.549(2)   | C17A | C18A | 1.547(2)   |
| C18  | C19  | 1.5023(19) | C18A | C19A | 1.4976(18) |

**Table S6. Bond Lengths for 2a.**

| Atom Atom Length/Å |     |            | Atom Atom Length/Å |      |            |
|--------------------|-----|------------|--------------------|------|------------|
| C19                | C20 | 1.398(2)   | C19A               | C20A | 1.3978(18) |
| C19                | C24 | 1.3986(18) | C19A               | C24A | 1.397(2)   |
| C20                | C21 | 1.387(2)   | C20A               | C21A | 1.387(2)   |
| C21                | C22 | 1.388(2)   | C21A               | C22A | 1.392(2)   |
| C22                | C23 | 1.385(2)   | C22A               | C23A | 1.384(2)   |
| C23                | C24 | 1.389(2)   | C23A               | C24A | 1.386(2)   |

**Table S7. Bond Angles for 2a.**

| Atom Atom Atom Angle/° |    |     |            | Atom Atom Atom Angle/° |     |      |            |
|------------------------|----|-----|------------|------------------------|-----|------|------------|
| C16                    | S1 | C1  | 96.85(6)   | C16A                   | S1A | C1A  | 97.46(6)   |
| C10                    | N1 | C11 | 120.20(11) | C10A                   | N1A | C11A | 120.67(11) |
| C2                     | C1 | S1  | 109.26(9)  | C2A                    | C1A | S1A  | 108.91(9)  |
| C2                     | C1 | C18 | 87.78(10)  | C2A                    | C1A | C18A | 87.35(10)  |
| C10                    | C1 | S1  | 107.27(9)  | C10A                   | C1A | S1A  | 108.08(9)  |
| C10                    | C1 | C2  | 118.77(11) | C10A                   | C1A | C2A  | 119.46(11) |
| C10                    | C1 | C18 | 118.76(10) | C10A                   | C1A | C18A | 117.68(10) |
| C18                    | C1 | S1  | 114.03(8)  | C18A                   | C1A | S1A  | 114.20(9)  |
| C3                     | C2 | C1  | 115.04(11) | C1A                    | C2A | C17A | 89.16(10)  |
| C3                     | C2 | C17 | 113.59(11) | C3A                    | C2A | C1A  | 114.31(11) |
| C17                    | C2 | C1  | 89.60(10)  | C3A                    | C2A | C17A | 112.60(11) |
| O1                     | C3 | C2  | 120.26(12) | O1A                    | C3A | C2A  | 120.12(12) |
| O1                     | C3 | C4  | 121.88(12) | O1A                    | C3A | C4A  | 121.78(12) |
| C4                     | C3 | C2  | 117.81(12) | C4A                    | C3A | C2A  | 118.08(12) |
| C5                     | C4 | C3  | 118.22(13) | C5A                    | C4A | C3A  | 117.90(13) |
| C5                     | C4 | C9  | 120.08(13) | C5A                    | C4A | C9A  | 120.08(12) |
| C9                     | C4 | C3  | 121.69(12) | C9A                    | C4A | C3A  | 122.02(12) |

**Table S7. Bond Angles for 2a.**

| Atom | Atom | Atom | Angle/°    | Atom | Atom | Atom | Angle/°    |
|------|------|------|------------|------|------|------|------------|
| C6   | C5   | C4   | 120.48(14) | C6A  | C5A  | C4A  | 120.47(14) |
| C5   | C6   | C7   | 119.67(13) | C5A  | C6A  | C7A  | 119.71(13) |
| C8   | C7   | C6   | 120.45(13) | C8A  | C7A  | C6A  | 120.30(13) |
| C7   | C8   | C9   | 120.71(13) | C7A  | C8A  | C9A  | 120.80(14) |
| C4   | C9   | C10  | 121.78(12) | C4A  | C9A  | C10A | 121.76(12) |
| C8   | C9   | C4   | 118.58(12) | C8A  | C9A  | C4A  | 118.58(12) |
| C8   | C9   | C10  | 119.63(12) | C8A  | C9A  | C10A | 119.65(13) |
| N1   | C10  | C1   | 123.71(12) | N1A  | C10A | C1A  | 123.98(12) |
| N1   | C10  | C9   | 117.91(12) | N1A  | C10A | C9A  | 118.08(12) |
| C9   | C10  | C1   | 118.38(11) | C9A  | C10A | C1A  | 117.91(12) |
| N1   | C11  | C16  | 123.05(12) | N1A  | C11A | C16A | 123.26(13) |
| C12  | C11  | N1   | 117.80(12) | C12A | C11A | N1A  | 117.36(12) |
| C12  | C11  | C16  | 118.86(13) | C12A | C11A | C16A | 119.08(13) |
| C13  | C12  | C11  | 120.95(14) | C13A | C12A | C11A | 120.71(14) |
| C12  | C13  | C14  | 119.89(14) | C12A | C13A | C14A | 119.84(15) |
| C15  | C14  | C13  | 120.07(14) | C15A | C14A | C13A | 120.26(14) |
| C14  | C15  | C16  | 120.39(13) | C14A | C15A | C16A | 120.29(14) |
| C11  | C16  | S1   | 119.58(10) | C11A | C16A | S1A  | 119.68(11) |
| C15  | C16  | S1   | 120.61(10) | C15A | C16A | S1A  | 120.47(11) |
| C15  | C16  | C11  | 119.80(13) | C15A | C16A | C11A | 119.82(13) |
| C2   | C17  | C18  | 89.44(10)  | C18A | C17A | C2A  | 88.72(10)  |
| C17  | C18  | C1   | 88.05(10)  | C17A | C18A | C1A  | 87.83(10)  |
| C19  | C18  | C1   | 119.22(10) | C19A | C18A | C1A  | 119.51(11) |
| C19  | C18  | C17  | 120.55(11) | C19A | C18A | C17A | 121.91(11) |
| C20  | C19  | C18  | 119.65(12) | C20A | C19A | C18A | 122.33(12) |
| C20  | C19  | C24  | 118.32(13) | C24A | C19A | C18A | 119.02(11) |

**Table S7. Bond Angles for 2a.**

| Atom | Atom | Atom | Angle/°    | Atom | Atom | Atom | Angle/°    |
|------|------|------|------------|------|------|------|------------|
| C24  | C19  | C18  | 121.98(12) | C24A | C19A | C20A | 118.57(13) |
| C21  | C20  | C19  | 120.66(14) | C21A | C20A | C19A | 120.48(14) |
| C20  | C21  | C22  | 120.45(15) | C20A | C21A | C22A | 120.36(13) |
| C23  | C22  | C21  | 119.45(14) | C23A | C22A | C21A | 119.52(14) |
| C22  | C23  | C24  | 120.37(14) | C22A | C23A | C24A | 120.28(14) |
| C23  | C24  | C19  | 120.73(14) | C23A | C24A | C19A | 120.79(13) |

**Table S8. Hydrogen Bonds for 2a.**

| D    | H    | A                | d(D-H)/Å | d(H-A)/Å | d(D-A)/Å   | D-H-A/° |
|------|------|------------------|----------|----------|------------|---------|
| C12  | H12  | O1 <sup>1</sup>  | 0.95     | 2.55     | 3.2623(18) | 132.2   |
| C18  | H18  | S1A <sup>1</sup> | 1.00     | 3.01     | 3.9929(14) | 166.4   |
| C12A | H12A | O1A <sup>2</sup> | 0.95     | 2.54     | 3.2896(19) | 136.3   |

<sup>1</sup>3/2-X, -1/2+Y, 1/2-Z; <sup>2</sup>5/2-X, 1/2+Y, 1/2-Z

**Table S9. Torsion Angles for 2a.**

| A  | B   | C   | D   | Angle/°     | A   | B    | C    | D    | Angle/°     |
|----|-----|-----|-----|-------------|-----|------|------|------|-------------|
| S1 | C1  | C2  | C3  | 146.19(10)  | S1A | C1A  | C2A  | C3A  | -150.36(10) |
| S1 | C1  | C2  | C17 | -97.81(10)  | S1A | C1A  | C2A  | C17A | 95.11(10)   |
| S1 | C1  | C10 | N1  | 50.97(15)   | S1A | C1A  | C10A | N1A  | -48.83(16)  |
| S1 | C1  | C10 | C9  | -128.27(10) | S1A | C1A  | C10A | C9A  | 133.00(10)  |
| S1 | C1  | C18 | C17 | 93.25(10)   | S1A | C1A  | C18A | C17A | -89.95(10)  |
| S1 | C1  | C18 | C19 | -31.06(15)  | S1A | C1A  | C18A | C19A | 35.95(15)   |
| O1 | C3  | C4  | C5  | 17.1(2)     | O1A | C3A  | C4A  | C5A  | -13.4(2)    |
| O1 | C3  | C4  | C9  | -163.39(13) | O1A | C3A  | C4A  | C9A  | 167.08(14)  |
| N1 | C11 | C12 | C13 | 174.41(14)  | N1A | C11A | C12A | C13A | -173.65(13) |
| N1 | C11 | C16 | S1  | 6.35(19)    | N1A | C11A | C16A | S1A  | -5.00(19)   |

**Table S9. Torsion Angles for 2a.**

| A  | B   | C   | D   | Angle/°     | A   | B    | C    | D    | Angle/°     |
|----|-----|-----|-----|-------------|-----|------|------|------|-------------|
| N1 | C11 | C16 | C15 | -172.54(13) | N1A | C11A | C16A | C15A | 172.65(13)  |
| C1 | S1  | C16 | C11 | 30.97(12)   | C1A | S1A  | C16A | C11A | -30.51(12)  |
| C1 | S1  | C16 | C15 | -150.15(12) | C1A | S1A  | C16A | C15A | 151.86(12)  |
| C1 | C2  | C3  | O1  | 152.33(13)  | C1A | C2A  | C3A  | O1A  | -153.11(13) |
| C1 | C2  | C3  | C4  | -30.08(17)  | C1A | C2A  | C3A  | C4A  | 28.77(17)   |
| C1 | C2  | C17 | C18 | -17.36(10)  | C1A | C2A  | C17A | C18A | 20.08(10)   |
| C1 | C18 | C19 | C20 | -88.63(15)  | C1A | C18A | C19A | C20A | -85.38(16)  |
| C1 | C18 | C19 | C24 | 88.76(15)   | C1A | C18A | C19A | C24A | 91.34(15)   |
| C2 | C1  | C10 | N1  | 175.37(12)  | C2A | C1A  | C10A | N1A  | -174.00(12) |
| C2 | C1  | C10 | C9  | -3.88(17)   | C2A | C1A  | C10A | C9A  | 7.84(17)    |
| C2 | C1  | C18 | C17 | -16.88(9)   | C2A | C1A  | C18A | C17A | 19.62(9)    |
| C2 | C1  | C18 | C19 | -141.20(12) | C2A | C1A  | C18A | C19A | 145.52(12)  |
| C2 | C3  | C4  | C5  | -160.49(13) | C2A | C3A  | C4A  | C5A  | 164.68(12)  |
| C2 | C3  | C4  | C9  | 19.06(19)   | C2A | C3A  | C4A  | C9A  | -14.84(19)  |
| C2 | C17 | C18 | C1  | 16.92(10)   | C2A | C17A | C18A | C1A  | -19.60(9)   |
| C2 | C17 | C18 | C19 | 140.09(12)  | C2A | C17A | C18A | C19A | -143.45(12) |
| C3 | C2  | C17 | C18 | 99.95(12)   | C3A | C2A  | C17A | C18A | -96.02(12)  |
| C3 | C4  | C5  | C6  | 178.48(14)  | C3A | C4A  | C5A  | C6A  | -177.76(13) |
| C3 | C4  | C9  | C8  | -178.32(12) | C3A | C4A  | C9A  | C8A  | 176.57(12)  |
| C3 | C4  | C9  | C10 | 1.3(2)      | C3A | C4A  | C9A  | C10A | -4.6(2)     |
| C4 | C5  | C6  | C7  | 0.6(2)      | C4A | C5A  | C6A  | C7A  | 0.6(2)      |
| C4 | C9  | C10 | N1  | 171.92(13)  | C4A | C9A  | C10A | N1A  | -170.33(13) |
| C4 | C9  | C10 | C1  | -8.79(18)   | C4A | C9A  | C10A | C1A  | 7.95(18)    |
| C5 | C4  | C9  | C8  | 1.2(2)      | C5A | C4A  | C9A  | C8A  | -2.9(2)     |
| C5 | C4  | C9  | C10 | -179.18(13) | C5A | C4A  | C9A  | C10A | 175.89(12)  |
| C5 | C6  | C7  | C8  | -0.2(2)     | C5A | C6A  | C7A  | C8A  | -1.8(2)     |

**Table S9. Torsion Angles for 2a.**

| <b>A</b> | <b>B</b> | <b>C</b> | <b>D</b> | <b>Angle/°</b> | <b>A</b> | <b>B</b> | <b>C</b> | <b>D</b> | <b>Angle/°</b> |
|----------|----------|----------|----------|----------------|----------|----------|----------|----------|----------------|
| C6       | C7       | C8       | C9       | 0.4(2)         | C6A      | C7A      | C8A      | C9A      | 0.6(2)         |
| C7       | C8       | C9       | C4       | -0.9(2)        | C7A      | C8A      | C9A      | C4A      | 1.8(2)         |
| C7       | C8       | C9       | C10      | 179.52(12)     | C7A      | C8A      | C9A      | C10A     | -177.07(13)    |
| C8       | C9       | C10      | N1       | -8.49(19)      | C8A      | C9A      | C10A     | N1A      | 8.49(19)       |
| C8       | C9       | C10      | C1       | 170.80(12)     | C8A      | C9A      | C10A     | C1A      | -173.23(12)    |
| C9       | C4       | C5       | C6       | -1.1(2)        | C9A      | C4A      | C5A      | C6A      | 1.8(2)         |
| C10      | N1       | C11      | C12      | 161.76(13)     | C10A     | N1A      | C11A     | C12A     | -163.46(13)    |
| C10      | N1       | C11      | C16      | -24.5(2)       | C10A     | N1A      | C11A     | C16A     | 22.9(2)        |
| C10      | C1       | C2       | C3       | 22.77(17)      | C10A     | C1A      | C2A      | C3A      | -25.59(17)     |
| C10      | C1       | C2       | C17      | 138.77(12)     | C10A     | C1A      | C2A      | C17A     | -140.12(12)    |
| C10      | C1       | C18      | C17      | -138.76(12)    | C10A     | C1A      | C18A     | C17A     | 141.74(12)     |
| C10      | C1       | C18      | C19      | 96.93(14)      | C10A     | C1A      | C18A     | C19A     | -92.37(14)     |
| C11      | N1       | C10      | C1       | -8.6(2)        | C11A     | N1A      | C10A     | C1A      | 8.3(2)         |
| C11      | N1       | C10      | C9       | 170.64(12)     | C11A     | N1A      | C10A     | C9A      | -173.57(12)    |
| C11      | C12      | C13      | C14      | -1.7(2)        | C11A     | C12A     | C13A     | C14A     | 0.7(2)         |
| C12      | C11      | C16      | S1       | -179.97(11)    | C12A     | C11A     | C16A     | S1A      | -178.57(11)    |
| C12      | C11      | C16      | C15      | 1.1(2)         | C12A     | C11A     | C16A     | C15A     | -0.9(2)        |
| C12      | C13      | C14      | C15      | 1.4(3)         | C12A     | C13A     | C14A     | C15A     | -1.1(2)        |
| C13      | C14      | C15      | C16      | 0.2(2)         | C13A     | C14A     | C15A     | C16A     | 0.5(2)         |
| C14      | C15      | C16      | S1       | 179.69(12)     | C14A     | C15A     | C16A     | S1A      | 178.16(12)     |
| C14      | C15      | C16      | C11      | -1.4(2)        | C14A     | C15A     | C16A     | C11A     | 0.5(2)         |
| C16      | S1       | C1       | C2       | 176.18(9)      | C16A     | S1A      | C1A      | C2A      | -176.78(9)     |
| C16      | S1       | C1       | C10      | -53.84(10)     | C16A     | S1A      | C1A      | C10A     | 52.02(10)      |
| C16      | S1       | C1       | C18      | 79.81(10)      | C16A     | S1A      | C1A      | C18A     | -81.02(10)     |
| C16      | C11      | C12      | C13      | 0.4(2)         | C16A     | C11A     | C12A     | C13A     | 0.3(2)         |
| C17      | C2       | C3       | O1       | 51.06(18)      | C17A     | C2A      | C3A      | O1A      | -53.28(18)     |

**Table S9. Torsion Angles for 2a.**

| A   | B   | C   | D   | Angle/°     | A    | B    | C    | D    | Angle/°     |
|-----|-----|-----|-----|-------------|------|------|------|------|-------------|
| C17 | C2  | C3  | C4  | -131.35(13) | C17A | C2A  | C3A  | C4A  | 128.60(13)  |
| C17 | C18 | C19 | C20 | 164.82(13)  | C17A | C18A | C19A | C20A | 22.15(19)   |
| C17 | C18 | C19 | C24 | -17.79(19)  | C17A | C18A | C19A | C24A | -161.13(13) |
| C18 | C1  | C2  | C3  | -99.10(12)  | C18A | C1A  | C2A  | C3A  | 94.94(12)   |
| C18 | C1  | C2  | C17 | 16.91(10)   | C18A | C1A  | C2A  | C17A | -19.59(9)   |
| C18 | C1  | C10 | N1  | -80.10(16)  | C18A | C1A  | C10A | N1A  | 82.33(16)   |
| C18 | C1  | C10 | C9  | 100.65(14)  | C18A | C1A  | C10A | C9A  | -95.84(14)  |
| C18 | C19 | C20 | C21 | 175.96(13)  | C18A | C19A | C20A | C21A | 176.11(13)  |
| C18 | C19 | C24 | C23 | -177.12(13) | C18A | C19A | C24A | C23A | -176.25(13) |
| C19 | C20 | C21 | C22 | 2.0(2)      | C19A | C20A | C21A | C22A | 0.3(2)      |
| C20 | C19 | C24 | C23 | 0.3(2)      | C20A | C19A | C24A | C23A | 0.6(2)      |
| C20 | C21 | C22 | C23 | -1.2(2)     | C20A | C21A | C22A | C23A | 0.1(2)      |
| C21 | C22 | C23 | C24 | 0.0(2)      | C21A | C22A | C23A | C24A | -0.2(2)     |
| C22 | C23 | C24 | C19 | 0.5(2)      | C22A | C23A | C24A | C19A | -0.2(2)     |
| C24 | C19 | C20 | C21 | -1.5(2)     | C24A | C19A | C20A | C21A | -0.6(2)     |

**Table S10. Hydrogen Atom Coordinates ( $\text{\AA}\times 10^4$ ) and Isotropic Displacement Parameters ( $\text{\AA}^2\times 10^3$ ) for 2a.**

| Atom | x        | y       | z       | U(eq) |
|------|----------|---------|---------|-------|
| H2   | 10432.59 | 6875.02 | 1576.86 | 22    |
| H5   | 7503.8   | 6811.19 | 272.44  | 30    |
| H6   | 6273.29  | 5513.86 | 45.41   | 33    |
| H7   | 5989.31  | 4281.12 | 766.91  | 29    |
| H8   | 6942.1   | 4334.06 | 1705.03 | 24    |
| H12  | 7417.22  | 4248.99 | 3561.53 | 30    |
| H13  | 8431.93  | 3919.38 | 4457.13 | 37    |
| H14  | 10382.91 | 4306.67 | 4537.18 | 36    |

**Table S10. Hydrogen Atom Coordinates ( $\text{\AA}\times 10^4$ ) and Isotropic Displacement Parameters ( $\text{\AA}^2\times 10^3$ ) for 2a.**

| Atom | x        | y        | z       | U(eq) |
|------|----------|----------|---------|-------|
| H15  | 11286.9  | 5080.17  | 3734.28 | 29    |
| H17A | 9350.93  | 8528.09  | 2024.56 | 28    |
| H17B | 10521.89 | 8081.72  | 2329.1  | 28    |
| H18  | 8192.73  | 7509.03  | 2576.46 | 21    |
| H20  | 7772.15  | 6853.41  | 3590.91 | 29    |
| H21  | 8232.33  | 6797.86  | 4625.96 | 36    |
| H22  | 10002.03 | 7373.67  | 4985.35 | 37    |
| H23  | 11340.13 | 7948.05  | 4296.26 | 32    |
| H24  | 10914.91 | 7954.47  | 3256.05 | 25    |
| H2A  | 9488.35  | 11503.47 | 3406.68 | 22    |
| H5A  | 12555.33 | 11413.31 | 4663.25 | 28    |
| H6A  | 13857.96 | 12658.19 | 4892.54 | 32    |
| H7A  | 14048.17 | 13982.28 | 4224.07 | 30    |
| H8A  | 13009.66 | 14021.53 | 3310.86 | 26    |
| H12A | 12514.3  | 14233.22 | 1476.69 | 29    |
| H13A | 11508.1  | 14614.73 | 581.6   | 35    |
| H14A | 9583.56  | 14165.34 | 468.1   | 38    |
| H15A | 8687.06  | 13291.19 | 1233.22 | 31    |
| H17C | 10529.7  | 9846.33  | 2945.32 | 26    |
| H17D | 9409.53  | 10340.97 | 2615.02 | 26    |
| H18A | 11785.48 | 10879.27 | 2467.7  | 21    |
| H20A | 9166.16  | 10539.4  | 1637.63 | 26    |
| H21A | 8961.52  | 10598.79 | 581.59  | 31    |
| H22A | 10493    | 11093.06 | -16.39  | 32    |
| H23A | 12231.58 | 11522.98 | 450.58  | 31    |
| H24A | 12442.63 | 11467.27 | 1505.5  | 26    |



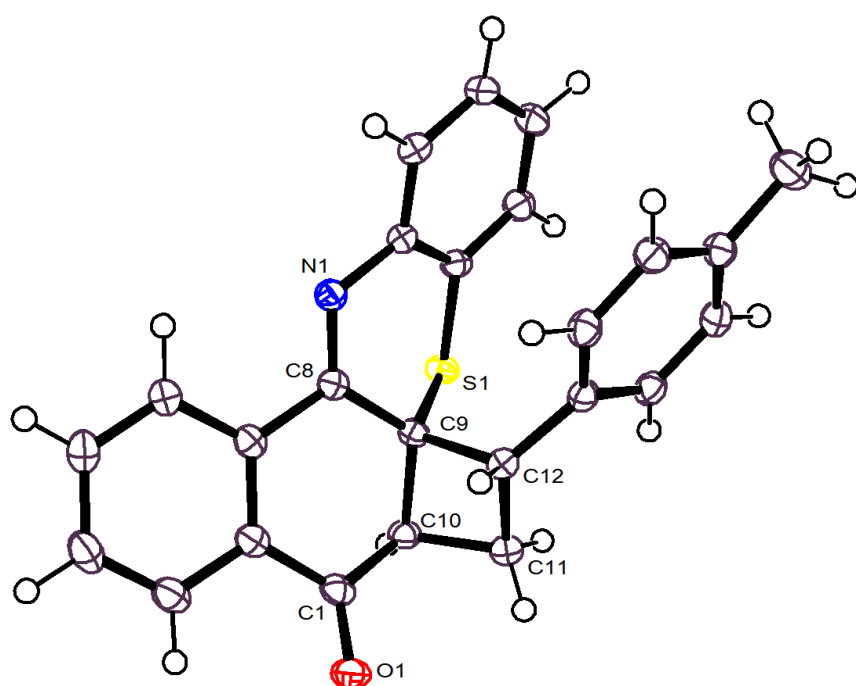

**Table S11. Crystal data and structure refinement for 2o.**

|                       |                                        |
|-----------------------|----------------------------------------|
| Identification code   | <b>2o</b>                              |
| CCDC Number           | <b>2332712</b>                         |
| Empirical formula     | <b>C<sub>25</sub>H<sub>19</sub>NOS</b> |
| Formula weight        | 381.47                                 |
| Temperature/K         | 140(2)                                 |
| Crystal system        | monoclinic                             |
| Space group           | P2 <sub>1</sub> /n                     |
| a/Å                   | 8.381(2)                               |
| b/Å                   | 20.496(7)                              |
| c/Å                   | 11.336(4)                              |
| α/°                   | 90                                     |
| β/°                   | 105.075(7)                             |
| γ/°                   | 90                                     |
| Volume/Å <sup>3</sup> | 1880.3(10)                             |

|                                                |                                                               |
|------------------------------------------------|---------------------------------------------------------------|
| Z                                              | 4                                                             |
| $\rho_{\text{calc}}/\text{cm}^3$               | 1.348                                                         |
| $\mu/\text{mm}^{-1}$                           | 0.188                                                         |
| F(000)                                         | 800.0                                                         |
| Crystal size/ $\text{mm}^3$                    | $0.0151 \times 0.0134 \times 0.0123$                          |
| Radiation                                      | MoK $\alpha$ ( $\lambda = 0.71073$ )                          |
| 2 $\Theta$ range for data collection/ $^\circ$ | 5.412 to 53.864                                               |
| Index ranges                                   | $-10 \leq h \leq 8, -25 \leq k \leq 26, -13 \leq l \leq 14$   |
| Reflections collected                          | 15251                                                         |
| Independent reflections                        | 4046 [ $R_{\text{int}} = 0.0415, R_{\text{sigma}} = 0.0389$ ] |
| Data/restraints/parameters                     | 4046/0/329                                                    |
| Goodness-of-fit on $F^2$                       | 1.043                                                         |
| Final R indexes [ $I \geq 2\sigma(I)$ ]        | $R_1 = 0.0397, wR_2 = 0.0973$                                 |
| Final R indexes [all data]                     | $R_1 = 0.0447, wR_2 = 0.1008$                                 |
| Largest diff. peak/hole / $e \text{ \AA}^{-3}$ | 0.68/-0.20                                                    |

**Table S12. Fractional Atomic Coordinates ( $\times 10^4$ ) and Equivalent Isotropic Displacement Parameters ( $\text{\AA}^2 \times 10^3$ ) for 2o.  $U_{\text{eq}}$  is defined as 1/3 of the trace of the orthogonalised  $U_{\text{ij}}$  tensor.**

| Atom | $x$        | $y$       | $z$        | $U(\text{eq})$ |
|------|------------|-----------|------------|----------------|
| S1   | 7780.5(5)  | 3092.0(2) | 6551.0(3)  | 19.05(11)      |
| O1   | 9619.4(15) | 4670.7(5) | 3652.5(11) | 25.5(3)        |
| N1   | 4545.9(16) | 3261.3(6) | 4524.0(11) | 18.7(3)        |
| C1   | 8561(2)    | 4437.4(7) | 4101.3(14) | 20.1(3)        |
| C2   | 6812(2)    | 4665.6(7) | 3742.0(14) | 20.1(3)        |
| C3   | 6473(2)    | 5286.2(8) | 3197.5(15) | 25.4(3)        |
| C4   | 4871(2)    | 5523.3(8) | 2853.4(16) | 28.2(4)        |
| C5   | 3570(2)    | 5141.6(8) | 3041.3(15) | 25.8(3)        |
| C6   | 3877(2)    | 4526.6(7) | 3573.7(14) | 21.6(3)        |

**Table S12. Fractional Atomic Coordinates ( $\times 10^4$ ) and Equivalent Isotropic Displacement Parameters ( $\text{\AA}^2 \times 10^3$ ) for 2o.  $U_{\text{eq}}$  is defined as 1/3 of the trace of the orthogonalised  $U_{\text{ij}}$  tensor.**

| Atom | $x$        | $y$       | $z$        | $U(\text{eq})$ |
|------|------------|-----------|------------|----------------|
| C7   | 5501.0(19) | 4279.4(7) | 3933.4(13) | 18.8(3)        |
| C8   | 5814.0(18) | 3622.1(7) | 4505.9(13) | 17.1(3)        |
| C9   | 7593.5(18) | 3416.6(7) | 5029.0(13) | 17.0(3)        |
| C10  | 9012.0(19) | 3916.0(7) | 5086.7(14) | 19.5(3)        |
| C11  | 10094(2)   | 3360.3(8) | 4777.1(16) | 22.9(3)        |
| C12  | 8477.7(19) | 2970.8(7) | 4229.3(14) | 19.3(3)        |
| C13  | 8359.7(19) | 2238.1(7) | 4321.9(14) | 20.0(3)        |
| C14  | 9456(2)    | 1869.8(8) | 5215.6(15) | 22.2(3)        |
| C15  | 9179(2)    | 1202.7(8) | 5346.2(15) | 23.9(3)        |
| C16  | 7802(2)    | 889.5(8)  | 4593.2(15) | 23.6(3)        |
| C17  | 6717(2)    | 1260.8(8) | 3694.4(15) | 24.1(3)        |
| C18  | 6997(2)    | 1919.8(8) | 3551.0(15) | 22.8(3)        |
| C19  | 7461(3)    | 172.4(9)  | 4748.7(18) | 31.8(4)        |
| C20  | 6153.0(18) | 2516.5(7) | 6136.5(13) | 17.8(3)        |
| C21  | 6257(2)    | 1923.5(7) | 6764.7(14) | 21.4(3)        |
| C22  | 4983(2)    | 1467.2(8) | 6410.2(15) | 24.0(3)        |
| C23  | 3615(2)    | 1600.6(8) | 5438.8(16) | 23.6(3)        |
| C24  | 3491.7(19) | 2197.9(8) | 4832.5(15) | 21.3(3)        |
| C25  | 4768.6(19) | 2661.1(7) | 5160.8(14) | 18.3(3)        |

**Table S13. Anisotropic Displacement Parameters ( $\text{\AA}^2 \times 10^3$ ) for 2o. The Anisotropic displacement factor exponent takes the form:  $-2\pi^2[h^2a^*U_{11}+2hka^*b^*U_{12}+\dots]$ .**

| Atom | $U_{11}$ | $U_{22}$  | $U_{33}$  | $U_{23}$ | $U_{13}$ | $U_{12}$  |
|------|----------|-----------|-----------|----------|----------|-----------|
| S1   | 18.2(2)  | 20.07(19) | 17.57(19) | 0.81(13) | 2.33(14) | -3.00(14) |
| O1   | 27.9(6)  | 22.8(6)   | 29.5(6)   | -1.0(5)  | 13.9(5)  | -6.2(5)   |
| N1   | 17.1(6)  | 18.1(6)   | 20.1(6)   | 0.8(5)   | 3.5(5)   | -0.5(5)   |

**Table S13. Anisotropic Displacement Parameters ( $\text{\AA}^2 \times 10^3$ ) for 2o. The Anisotropic displacement factor exponent takes the form:  $-2\pi^2[h^2a^*U_{11}+2hka^*b^*U_{12}+\dots]$ .**

| Atom | U <sub>11</sub> | U <sub>22</sub> | U <sub>33</sub> | U <sub>23</sub> | U <sub>13</sub> | U <sub>12</sub> |
|------|-----------------|-----------------|-----------------|-----------------|-----------------|-----------------|
| C1   | 24.7(8)         | 15.9(7)         | 20.7(7)         | -4.5(6)         | 7.5(6)          | -4.7(6)         |
| C2   | 25.1(8)         | 18.1(7)         | 18.1(7)         | -1.0(6)         | 7.4(6)          | -1.6(6)         |
| C3   | 32.7(9)         | 20.7(8)         | 25.1(8)         | 2.0(6)          | 11.6(7)         | -1.9(7)         |
| C4   | 38.7(10)        | 19.5(8)         | 27.4(8)         | 4.8(6)          | 10.6(7)         | 4.3(7)          |
| C5   | 28.1(9)         | 23.8(8)         | 25.2(8)         | 1.9(6)          | 6.2(7)          | 7.4(7)          |
| C6   | 23.4(8)         | 19.6(7)         | 21.4(7)         | 0.1(6)          | 5.3(6)          | 1.8(6)          |
| C7   | 23.1(8)         | 17.1(7)         | 16.4(7)         | -1.4(5)         | 5.5(6)          | -0.1(6)         |
| C8   | 18.5(7)         | 17.3(7)         | 15.7(7)         | -1.2(5)         | 4.8(6)          | -0.7(5)         |
| C9   | 17.4(7)         | 15.8(7)         | 17.5(7)         | -0.4(5)         | 3.7(6)          | -2.6(5)         |
| C10  | 17.5(8)         | 19.0(7)         | 21.8(8)         | -1.5(6)         | 5.0(6)          | -3.9(6)         |
| C11  | 18.7(8)         | 20.8(8)         | 29.9(9)         | 0.3(6)          | 7.7(7)          | -1.8(6)         |
| C12  | 17.7(8)         | 19.7(7)         | 20.9(7)         | 0.0(6)          | 6.0(6)          | 0.2(6)          |
| C13  | 18.8(8)         | 19.6(7)         | 23.4(8)         | -3.5(6)         | 8.7(6)          | 0.3(6)          |
| C14  | 16.4(8)         | 23.3(8)         | 26.2(8)         | -2.5(6)         | 4.4(6)          | 0.5(6)          |
| C15  | 21.5(8)         | 23.4(8)         | 26.7(8)         | 0.9(6)          | 6.0(7)          | 4.7(6)          |
| C16  | 26.3(9)         | 20.3(7)         | 27.1(8)         | -3.0(6)         | 12.4(7)         | -0.7(6)         |
| C17  | 22.3(8)         | 23.4(8)         | 26.5(8)         | -6.9(6)         | 5.9(7)          | -2.8(6)         |
| C18  | 22.0(8)         | 23.4(8)         | 22.6(8)         | -3.4(6)         | 5.1(6)          | 1.8(6)          |
| C19  | 36.6(10)        | 23.0(8)         | 36.1(10)        | 0.8(7)          | 10.2(8)         | -3.2(7)         |
| C20  | 17.1(7)         | 18.6(7)         | 18.6(7)         | -0.6(5)         | 6.2(6)          | -1.8(6)         |
| C21  | 21.1(8)         | 21.5(7)         | 21.9(8)         | 2.1(6)          | 5.8(6)          | 0.9(6)          |
| C22  | 27.1(9)         | 19.7(7)         | 27.3(8)         | 4.8(6)          | 10.7(7)         | -0.4(6)         |
| C23  | 20.6(8)         | 19.7(7)         | 32.2(9)         | -1.2(6)         | 10.1(7)         | -4.3(6)         |
| C24  | 16.3(8)         | 22.8(8)         | 24.7(8)         | 0.1(6)          | 5.3(6)          | -0.8(6)         |
| C25  | 17.5(7)         | 17.5(7)         | 20.8(7)         | 0.6(6)          | 6.7(6)          | 0.3(6)          |

**Table S14. Bond Lengths for 2o.**

| Atom Atom Length/Å |     |            | Atom Atom Length/Å |     |          |
|--------------------|-----|------------|--------------------|-----|----------|
| S1                 | C9  | 1.8175(16) | C10                | C11 | 1.552(2) |
| S1                 | C20 | 1.7718(16) | C11                | C12 | 1.556(2) |
| O1                 | C1  | 1.2284(19) | C12                | C13 | 1.510(2) |
| N1                 | C8  | 1.2993(19) | C13                | C14 | 1.398(2) |
| N1                 | C25 | 1.4139(19) | C13                | C18 | 1.405(2) |
| C1                 | C2  | 1.491(2)   | C14                | C15 | 1.401(2) |
| C1                 | C10 | 1.521(2)   | C15                | C16 | 1.400(2) |
| C2                 | C3  | 1.410(2)   | C16                | C17 | 1.401(2) |
| C2                 | C7  | 1.416(2)   | C16                | C19 | 1.516(2) |
| C3                 | C4  | 1.386(3)   | C17                | C18 | 1.388(2) |
| C4                 | C5  | 1.403(2)   | C20                | C21 | 1.400(2) |
| C5                 | C6  | 1.392(2)   | C20                | C25 | 1.411(2) |
| C6                 | C7  | 1.410(2)   | C21                | C22 | 1.397(2) |
| C7                 | C8  | 1.489(2)   | C22                | C23 | 1.394(2) |
| C8                 | C9  | 1.514(2)   | C23                | C24 | 1.394(2) |
| C9                 | C10 | 1.557(2)   | C24                | C25 | 1.406(2) |
| C9                 | C12 | 1.599(2)   |                    |     |          |

**Table S15. Bond Angles for 2o.**

| Atom Atom Atom Angle/° |    |     |            | Atom Atom Atom Angle/° |     |     |            |
|------------------------|----|-----|------------|------------------------|-----|-----|------------|
| C20                    | S1 | C9  | 96.98(7)   | C11                    | C10 | C9  | 89.59(11)  |
| C8                     | N1 | C25 | 120.22(13) | C10                    | C11 | C12 | 88.11(12)  |
| O1                     | C1 | C2  | 121.96(14) | C11                    | C12 | C9  | 87.97(11)  |
| O1                     | C1 | C10 | 120.63(15) | C13                    | C12 | C9  | 118.72(12) |
| C2                     | C1 | C10 | 117.38(12) | C13                    | C12 | C11 | 123.25(13) |
| C3                     | C2 | C1  | 118.31(14) | C14                    | C13 | C12 | 122.98(14) |

**Table S15. Bond Angles for 2o.**

| Atom | Atom | Atom | Angle/°    | Atom | Atom | Atom | Angle/°    |
|------|------|------|------------|------|------|------|------------|
| C3   | C2   | C7   | 119.71(15) | C14  | C13  | C18  | 118.32(14) |
| C7   | C2   | C1   | 121.99(13) | C18  | C13  | C12  | 118.41(14) |
| C4   | C3   | C2   | 120.64(15) | C13  | C14  | C15  | 120.52(15) |
| C3   | C4   | C5   | 119.77(15) | C16  | C15  | C14  | 121.05(15) |
| C6   | C5   | C4   | 120.49(16) | C15  | C16  | C17  | 118.08(15) |
| C5   | C6   | C7   | 120.44(15) | C15  | C16  | C19  | 121.60(16) |
| C2   | C7   | C8   | 121.13(14) | C17  | C16  | C19  | 120.31(16) |
| C6   | C7   | C2   | 118.96(14) | C18  | C17  | C16  | 121.07(16) |
| C6   | C7   | C8   | 119.92(13) | C17  | C18  | C13  | 120.95(15) |
| N1   | C8   | C7   | 118.02(14) | C21  | C20  | S1   | 120.10(12) |
| N1   | C8   | C9   | 124.19(13) | C21  | C20  | C25  | 120.71(14) |
| C7   | C8   | C9   | 117.79(12) | C25  | C20  | S1   | 119.18(11) |
| C8   | C9   | S1   | 107.85(10) | C22  | C21  | C20  | 119.54(15) |
| C8   | C9   | C10  | 119.81(12) | C23  | C22  | C21  | 120.36(14) |
| C8   | C9   | C12  | 119.44(12) | C22  | C23  | C24  | 120.13(15) |
| C10  | C9   | S1   | 108.92(10) | C23  | C24  | C25  | 120.55(15) |
| C10  | C9   | C12  | 86.45(11)  | C20  | C25  | N1   | 123.75(13) |
| C12  | C9   | S1   | 113.01(10) | C24  | C25  | N1   | 117.51(14) |
| C1   | C10  | C9   | 112.95(13) | C24  | C25  | C20  | 118.67(13) |
| C1   | C10  | C11  | 113.43(13) |      |      |      |            |

**Table S16. Hydrogen Bonds for 2o.**

| D      | H               | A  | d(D-H)/Å | d(H-A)/Å  | d(D-A)/Å | D-H-A/°   |
|--------|-----------------|----|----------|-----------|----------|-----------|
| C10H10 | O1 <sup>1</sup> | O1 | 0.98(2)  | 2.571(19) | 3.301(2) | 131.1(14) |
| C21H21 | N1 <sup>2</sup> | N1 | 0.99(2)  | 2.64(2)   | 3.611(2) | 166.3(15) |

<sup>1</sup>2-X,1-Y,1-Z; <sup>2</sup>1/2+X,1/2-Y,1/2+Z

**Table S17. Torsion Angles for 2o.**

| <b>A</b> | <b>B</b> | <b>C</b> | <b>D</b> | <b>Angle/°</b> | <b>A</b> | <b>B</b> | <b>C</b> | <b>D</b> | <b>Angle/°</b> |
|----------|----------|----------|----------|----------------|----------|----------|----------|----------|----------------|
| S1       | C9       | C10      | C1       | -152.35(10)    | C8       | C9       | C12      | C13      | -89.39(17)     |
| S1       | C9       | C10      | C11      | 92.25(11)      | C9       | S1       | C20      | C21      | 146.77(12)     |
| S1       | C9       | C12      | C11      | -88.23(11)     | C9       | S1       | C20      | C25      | -32.51(13)     |
| S1       | C9       | C12      | C13      | 39.07(17)      | C9       | C10      | C11      | C12      | 21.44(11)      |
| S1       | C20      | C21      | C22      | -178.50(12)    | C9       | C12      | C13      | C14      | -86.12(19)     |
| S1       | C20      | C25      | N1       | -3.8(2)        | C9       | C12      | C13      | C18      | 87.62(18)      |
| S1       | C20      | C25      | C24      | 179.40(11)     | C10      | C1       | C2       | C3       | 157.17(14)     |
| O1       | C1       | C2       | C3       | -20.7(2)       | C10      | C1       | C2       | C7       | -22.8(2)       |
| O1       | C1       | C2       | C7       | 159.34(14)     | C10      | C9       | C12      | C11      | 20.83(11)      |
| O1       | C1       | C10      | C9       | -147.11(14)    | C10      | C9       | C12      | C13      | 148.14(14)     |
| O1       | C1       | C10      | C11      | -47.03(19)     | C10      | C11      | C12      | C9       | -20.87(11)     |
| N1       | C8       | C9       | S1       | -48.03(17)     | C10      | C11      | C12      | C13      | -144.35(14)    |
| N1       | C8       | C9       | C10      | -173.28(13)    | C11      | C12      | C13      | C14      | 22.0(2)        |
| N1       | C8       | C9       | C12      | 82.75(18)      | C11      | C12      | C13      | C18      | -164.27(14)    |
| C1       | C2       | C3       | C4       | -179.59(14)    | C12      | C9       | C10      | C1       | 94.53(13)      |
| C1       | C2       | C7       | C6       | 179.85(13)     | C12      | C9       | C10      | C11      | -20.87(11)     |
| C1       | C2       | C7       | C8       | -0.1(2)        | C12      | C13      | C14      | C15      | 172.72(14)     |
| C1       | C10      | C11      | C12      | -93.51(14)     | C12      | C13      | C18      | C17      | -172.14(14)    |
| C2       | C1       | C10      | C9       | 34.95(18)      | C13      | C14      | C15      | C16      | -0.3(2)        |
| C2       | C1       | C10      | C11      | 135.04(14)     | C14      | C13      | C18      | C17      | 1.9(2)         |
| C2       | C3       | C4       | C5       | -0.4(2)        | C14      | C15      | C16      | C17      | 0.7(2)         |
| C2       | C7       | C8       | N1       | -171.97(13)    | C14      | C15      | C16      | C19      | -178.19(15)    |
| C2       | C7       | C8       | C9       | 7.9(2)         | C15      | C16      | C17      | C18      | 0.1(2)         |
| C3       | C2       | C7       | C6       | -0.1(2)        | C16      | C17      | C18      | C13      | -1.5(2)        |
| C3       | C2       | C7       | C8       | -179.99(13)    | C18      | C13      | C14      | C15      | -1.0(2)        |
| C3       | C4       | C5       | C6       | 0.2(3)         | C19      | C16      | C17      | C18      | 179.08(15)     |

**Table S17. Torsion Angles for 2o.**

| A  | B  | C   | D   | Angle/°     | A   | B   | C   | D   | Angle/°     |
|----|----|-----|-----|-------------|-----|-----|-----|-----|-------------|
| C4 | C5 | C6  | C7  | 0.1(2)      | C20 | S1  | C9  | C8  | 53.06(11)   |
| C5 | C6 | C7  | C2  | -0.1(2)     | C20 | S1  | C9  | C10 | -175.46(10) |
| C5 | C6 | C7  | C8  | 179.77(14)  | C20 | S1  | C9  | C12 | -81.19(11)  |
| C6 | C7 | C8  | N1  | 8.1(2)      | C20 | C21 | C22 | C23 | -0.1(2)     |
| C6 | C7 | C8  | C9  | -171.97(13) | C21 | C20 | C25 | N1  | 176.95(13)  |
| C7 | C2 | C3  | C4  | 0.3(2)      | C21 | C20 | C25 | C24 | 0.1(2)      |
| C7 | C8 | C9  | S1  | 132.06(11)  | C21 | C22 | C23 | C24 | -1.5(2)     |
| C7 | C8 | C9  | C10 | 6.81(19)    | C22 | C23 | C24 | C25 | 2.5(2)      |
| C7 | C8 | C9  | C12 | -97.15(15)  | C23 | C24 | C25 | N1  | -178.76(13) |
| C8 | N1 | C25 | C20 | 23.9(2)     | C23 | C24 | C25 | C20 | -1.7(2)     |
| C8 | N1 | C25 | C24 | -159.28(14) | C25 | N1  | C8  | C7  | -173.78(12) |
| C8 | C9 | C10 | C1  | -27.61(18)  | C25 | N1  | C8  | C9  | 6.3(2)      |
| C8 | C9 | C10 | C11 | -143.01(13) | C25 | C20 | C21 | C22 | 0.8(2)      |
| C8 | C9 | C12 | C11 | 143.30(13)  |     |     |     |     |             |

**Table S18. Hydrogen Atom Coordinates ( $\text{\AA} \times 10^4$ ) and Isotropic Displacement Parameters ( $\text{\AA}^2 \times 10^3$ ) for 2o.**

| Atom | x         | y        | z        | U(eq) |
|------|-----------|----------|----------|-------|
| H3   | 7390(20)  | 5540(9)  | 3100(17) | 28(5) |
| H4   | 4650(20)  | 5965(10) | 2506(17) | 31(5) |
| H5   | 2450(20)  | 5293(9)  | 2801(17) | 28(5) |
| H6   | 2940(20)  | 4253(9)  | 3710(17) | 28(5) |
| H10  | 9440(20)  | 4142(9)  | 5869(18) | 29(5) |
| H11A | 10770(20) | 3170(9)  | 5496(18) | 26(5) |
| H11B | 10800(20) | 3470(9)  | 4244(17) | 25(5) |
| H12  | 7990(20)  | 3106(8)  | 3352(17) | 21(4) |
| H14  | 10390(20) | 2078(9)  | 5761(18) | 29(5) |



**Table S18. Hydrogen Atom Coordinates ( $\text{\AA} \times 10^4$ ) and Isotropic Displacement Parameters ( $\text{\AA}^2 \times 10^3$ ) for 2o.**

| Atom | x        | y       | z        | U(eq) |
|------|----------|---------|----------|-------|
| H15  | 9950(20) | 959(9)  | 5980(18) | 31(5) |
| H17  | 5730(30) | 1037(9) | 3198(18) | 31(5) |
| H18  | 6200(20) | 2193(9) | 2919(18) | 29(5) |
| H19A | 6580(30) | 112(11) | 5160(20) | 52(7) |
| H19B | 8490(30) | -80(12) | 5200(20) | 58(7) |
| H19C | 7020(30) | -50(13) | 3920(30) | 69(8) |
| H21  | 7270(20) | 1834(9) | 7431(18) | 25(5) |
| H22  | 5110(20) | 1052(9) | 6825(18) | 30(5) |
| H23  | 2750(20) | 1285(9) | 5171(18) | 31(5) |
| H24  | 2500(20) | 2292(9) | 4164(17) | 24(5) |

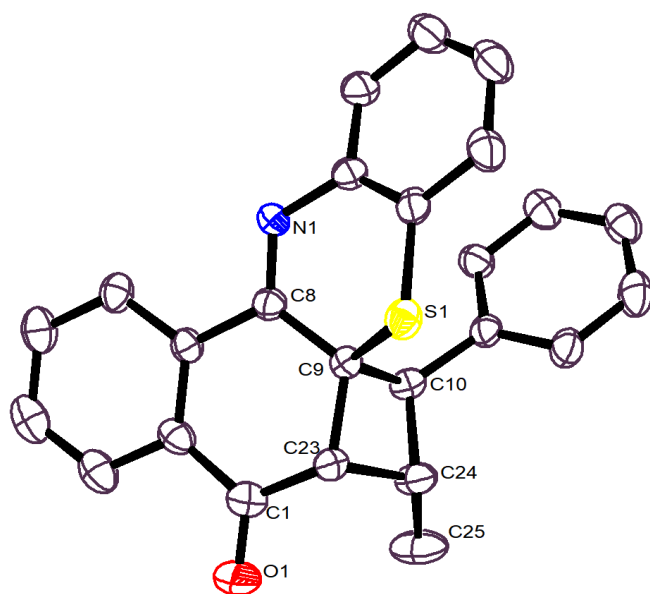

**Table S19. Crystal data and structure refinement for 2x.**

|                     |                                               |
|---------------------|-----------------------------------------------|
| Identification code | <b>2x</b>                                     |
| CCDC Number         | <b>2403401</b>                                |
| Empirical formula   | $\text{C}_{50}\text{N}_2\text{O}_2\text{S}_2$ |
| Formula weight      | 724.64                                        |
| Temperature/K       | 140.0                                         |

|                                             |                                                                |
|---------------------------------------------|----------------------------------------------------------------|
| Crystal system                              | monoclinic                                                     |
| Space group                                 | P2 <sub>1</sub> /c                                             |
| a/Å                                         | 23.545(2)                                                      |
| b/Å                                         | 7.4959(7)                                                      |
| c/Å                                         | 24.005(2)                                                      |
| α/°                                         | 90                                                             |
| β/°                                         | 117.294(4)                                                     |
| γ/°                                         | 90                                                             |
| Volume/Å <sup>3</sup>                       | 3764.9(6)                                                      |
| Z                                           | 4                                                              |
| ρ <sub>calc</sub> /g/cm <sup>3</sup>        | 1.278                                                          |
| μ/mm <sup>-1</sup>                          | 0.185                                                          |
| F(000)                                      | 1448.0                                                         |
| Crystal size/mm <sup>3</sup>                | 0.02 × 0.01 × 0.008                                            |
| Radiation                                   | MoKα (λ = 0.71073)                                             |
| 2Θ range for data collection/°              | 4.014 to 60.178                                                |
| Index ranges                                | -32 ≤ h ≤ 33, -10 ≤ k ≤ 10, -33 ≤ l ≤ 33                       |
| Reflections collected                       | 58260                                                          |
| Independent reflections                     | 11018 [R <sub>int</sub> = 0.1528, R <sub>sigma</sub> = 0.1161] |
| Data/restraints/parameters                  | 11018/0/505                                                    |
| Goodness-of-fit on F <sup>2</sup>           | 1.039                                                          |
| Final R indexes [I >= 2σ (I)]               | R <sub>1</sub> = 0.0912, wR <sub>2</sub> = 0.2367              |
| Final R indexes [all data]                  | R <sub>1</sub> = 0.1572, wR <sub>2</sub> = 0.2903              |
| Largest diff. peak/hole / e Å <sup>-3</sup> | 0.77/-0.36                                                     |

**Table S20. Fractional Atomic Coordinates (×10<sup>4</sup>) and Equivalent Isotropic Displacement Parameters (Å<sup>2</sup>×10<sup>3</sup>) for 2x. U<sub>eq</sub> is defined as 1/3 of the trace of the orthogonalised U<sub>ij</sub> tensor.**

| Atom | x          | y           | z          | U(eq)   |
|------|------------|-------------|------------|---------|
| S001 | -3967.6(4) | -5326.3(12) | -7776.0(4) | 28.0(2) |
| S1   | -1096.0(4) | -4983.7(12) | -2385.8(5) | 28.0(2) |

**Table S20. Fractional Atomic Coordinates ( $\times 10^4$ ) and Equivalent Isotropic Displacement Parameters ( $\text{\AA}^2 \times 10^3$ ) for 2x.  $U_{\text{eq}}$  is defined as 1/3 of the trace of the orthogonalised  $U_{\text{IJ}}$  tensor.**

| Atom | <i>x</i>    | <i>y</i> | <i>z</i>    | $U(\text{eq})$ |
|------|-------------|----------|-------------|----------------|
| O003 | -3090.7(14) | -3371(5) | -5553.7(13) | 48.2(8)        |
| N004 | -2774.3(13) | -3393(4) | -7669.2(13) | 24.8(6)        |
| N1   | -2336.9(14) | -6656(4) | -2512.6(13) | 25.3(6)        |
| O1   | -262.5(16)  | -7439(6) | -216.0(14)  | 62.1(11)       |
| C007 | -2420.9(16) | -2967(5) | -6029.2(16) | 25.2(7)        |
| C008 | -1741.4(17) | -2719(4) | -6532.6(17) | 26.4(7)        |
| C009 | -2347.8(15) | -3030(4) | -6576.5(16) | 22.8(7)        |
| C00A | -2885.9(16) | -3378(4) | -7195.6(16) | 23.7(7)        |
| C00B | -1219.3(17) | -2366(5) | -5953.0(18) | 30.8(8)        |
| C6   | -2522.9(18) | -7060(5) | -1467.2(18) | 28.2(8)        |
| C00D | -4370.7(17) | -1151(5) | -7988.6(16) | 25.0(7)        |
| C9   | -1163.1(16) | -6789(5) | -1927.6(16) | 23.6(7)        |
| C11  | -979.9(16)  | -9137(5) | -2668.8(16) | 24.2(7)        |
| C00G | -3605.3(17) | -3856(5) | -6632.5(17) | 27.6(7)        |
| C7   | -1905.0(16) | -7064(4) | -1421.0(16) | 23.3(7)        |
| C2   | -1379.4(18) | -7287(5) | -826.7(17)  | 28.5(8)        |
| C00J | -3036.1(17) | -3376(5) | -6028.1(17) | 30.0(8)        |
| C00K | -1896.1(19) | -2553(5) | -5450.7(18) | 32.3(8)        |
| C00L | -3540.5(15) | -3562(5) | -7239.1(16) | 22.8(7)        |
| C8   | -1829.4(16) | -6806(4) | -1989.3(16) | 23.6(7)        |
| C5   | -2604(2)    | -7214(5) | -932.4(19)  | 34.1(9)        |
| C00O | -3822.6(17) | -4678(5) | -8397.2(18) | 27.8(8)        |
| C23  | -581.5(17)  | -6725(5) | -1266.7(17) | 27.1(7)        |
| C00Q | -3153.9(18) | -3203(5) | -8774.8(18) | 31.4(8)        |
| C10  | -908.1(16)  | -8642(5) | -2031.1(17) | 25.3(7)        |
| C00S | -3262.9(17) | -3746(5) | -8277.3(17) | 27.2(7)        |
| C00T | -1305.6(18) | -2247(5) | -5418.1(18) | 32.4(8)        |

**Table S20. Fractional Atomic Coordinates ( $\times 10^4$ ) and Equivalent Isotropic Displacement Parameters ( $\text{\AA}^2 \times 10^3$ ) for 2x.  $U_{\text{eq}}$  is defined as 1/3 of the trace of the orthogonalised  $U_{\text{IJ}}$  tensor.**

| Atom | <i>x</i>    | <i>y</i>  | <i>z</i>    | $U_{\text{eq}}$ |
|------|-------------|-----------|-------------|-----------------|
| C16  | -1531.2(18) | -10021(5) | -3087.4(17) | 28.9(8)         |
| C21  | -2837.0(19) | -6690(5)  | -3631.5(18) | 32.6(8)         |
| C15  | -1635(2)    | -10379(5) | -3690.5(19) | 35.8(9)         |
| C00X | -4255.3(19) | -5112(6)  | -9009.1(19) | 35.8(9)         |
| C4   | -2077(2)    | -7433(5)  | -347(2)     | 38.7(10)        |
| C00Z | -5009.5(18) | -1597(5)  | -8276.5(18) | 31.9(8)         |
| C010 | -3925.0(16) | -1754(5)  | -7334.0(16) | 25.0(7)         |
| C011 | -4119.3(19) | -210(5)   | -8324.7(18) | 31.8(8)         |
| C22  | -2301.5(17) | -6293(5)  | -3068.7(17) | 26.3(7)         |
| C3   | -1475(2)    | -7489(5)  | -300.3(19)  | 36.2(9)         |
| C1   | -707.4(19)  | -7219(6)  | -726.3(18)  | 35.5(9)         |
| C015 | -4160.8(17) | -2453(5)  | -6874.4(17) | 29.4(8)         |
| C24  | -247.2(17)  | -8163(5)  | -1485.4(18) | 31.2(8)         |
| C17  | -1780.2(18) | -5447(5)  | -3083.3(17) | 26.6(7)         |
| C018 | -5144(2)    | -223(6)   | -9238.7(18) | 37.8(9)         |
| C019 | -5404.6(19) | -1140(6)  | -8907.6(18) | 38.8(10)        |
| C14  | -1184(2)    | -9881(5)  | -3884.3(19) | 34.5(9)         |
| C18  | -1810(2)    | -4938(5)  | -3653.7(19) | 34.0(9)         |
| C13  | -632(2)     | -9041(5)  | -3464(2)    | 36.1(9)         |
| C12  | -529.3(18)  | -8648(5)  | -2860.8(19) | 31.9(8)         |
| C20  | -2865(2)    | -6189(6)  | -4197.1(19) | 41.1(10)        |
| C01F | -3582(2)    | -3629(6)  | -9384.9(19) | 39.6(10)        |
| C01G | -4506(2)    | 249(6)    | -8949(2)    | 37.9(9)         |
| C01H | -4122(2)    | -4602(6)  | -9501(2)    | 41.5(10)        |
| C19  | -2352(2)    | -5274(6)  | -4206(2)    | 40.2(10)        |
| C01J | -4211(2)    | -1152(6)  | -6416(2)    | 38.5(9)         |
| C25  | 136(2)      | -9680(6)  | -1058(2)    | 50.3(13)        |

**Table S21. Anisotropic Displacement Parameters ( $\text{\AA}^2 \times 10^3$ ) for 2x. The Anisotropic displacement factor exponent takes the form:  $-2\pi^2[h^2a^{*2}U_{11}+2hka^*b^*U_{12}+\dots]$ .**

| Atom | U <sub>11</sub> | U <sub>22</sub> | U <sub>33</sub> | U <sub>23</sub> | U <sub>13</sub> | U <sub>12</sub> |
|------|-----------------|-----------------|-----------------|-----------------|-----------------|-----------------|
| S001 | 22.1(4)         | 30.3(5)         | 29.8(5)         | 1.4(4)          | 10.4(4)         | -2.7(3)         |
| S1   | 28.4(5)         | 27.0(4)         | 32.4(5)         | 3.4(4)          | 17.3(4)         | 0.2(3)          |
| O003 | 35.2(16)        | 85(2)           | 27.8(15)        | 13.7(16)        | 17.3(13)        | 10.6(16)        |
| N004 | 19.6(14)        | 29.8(15)        | 22.0(14)        | 1.8(12)         | 6.9(12)         | 1.6(12)         |
| N1   | 24.5(15)        | 32.3(15)        | 20.0(14)        | 3.7(12)         | 10.9(12)        | 2.7(12)         |
| O1   | 35.1(18)        | 115(3)          | 26.3(16)        | 11.4(18)        | 5.7(14)         | 14.6(19)        |
| C007 | 20.9(16)        | 29.2(17)        | 22.5(17)        | 2.9(14)         | 7.5(13)         | 2.0(13)         |
| C008 | 24.3(18)        | 20.8(15)        | 31.3(19)        | -1.3(14)        | 10.4(15)        | -1.8(13)        |
| C009 | 18.0(16)        | 21.4(15)        | 25.9(17)        | 1.1(13)         | 7.4(13)         | -0.6(12)        |
| C00A | 21.6(17)        | 23.4(16)        | 26.6(17)        | 3.6(13)         | 11.4(14)        | 2.0(13)         |
| C00B | 25.2(19)        | 29.3(18)        | 29.4(19)        | -1.2(15)        | 5.2(15)         | -2.8(14)        |
| C6   | 30.1(19)        | 26.8(17)        | 32.8(19)        | 3.3(15)         | 18.7(16)        | 1.2(14)         |
| C00D | 23.3(17)        | 27.6(17)        | 22.2(17)        | 0.6(13)         | 8.8(14)         | 5.0(13)         |
| C9   | 21.4(16)        | 27.0(16)        | 22.3(16)        | 1.4(13)         | 10.0(13)        | 0.7(13)         |
| C11  | 23.7(17)        | 24.3(16)        | 25.7(17)        | 3.7(13)         | 12.4(14)        | 4.9(13)         |
| C00G | 20.6(17)        | 35.3(19)        | 27.0(18)        | 6.7(15)         | 10.9(14)        | 4.3(14)         |
| C7   | 25.6(17)        | 23.3(15)        | 23.2(17)        | 0.9(13)         | 12.9(14)        | -1.5(13)        |
| C2   | 34(2)           | 28.5(17)        | 22.0(17)        | 3.9(14)         | 11.8(15)        | 2.2(15)         |
| C00J | 26.7(19)        | 39(2)           | 22.4(18)        | 8.6(15)         | 9.6(15)         | 7.8(15)         |
| C00K | 31(2)           | 35.1(19)        | 25.3(19)        | 2.8(15)         | 7.7(16)         | -0.8(16)        |
| C00L | 17.1(16)        | 26.8(16)        | 23.0(16)        | 5.0(13)         | 8.0(13)         | 2.5(13)         |
| C8   | 23.3(17)        | 23.8(16)        | 23.6(17)        | 4.0(13)         | 10.8(14)        | 3.2(13)         |
| C5   | 44(2)           | 30.5(19)        | 39(2)           | 0.7(16)         | 28.0(19)        | -4.6(16)        |
| C00O | 19.0(17)        | 32.4(18)        | 28.1(18)        | -0.5(15)        | 7.5(14)         | 2.0(14)         |
| C23  | 21.7(17)        | 32.8(18)        | 24.3(17)        | -2.5(14)        | 8.5(14)         | 1.9(14)         |
| C00Q | 29.4(19)        | 40(2)           | 23.6(18)        | 1.6(16)         | 11.2(15)        | 4.5(16)         |
| C10  | 21.4(17)        | 24.6(16)        | 26.7(18)        | 2.2(14)         | 8.2(14)         | 1.9(13)         |

**Table S21. Anisotropic Displacement Parameters ( $\text{\AA}^2 \times 10^3$ ) for 2x. The Anisotropic displacement factor exponent takes the form:  $-2\pi^2[h^2a^*U_{11}+2hka^*b^*U_{12}+\dots]$ .**

| Atom | U <sub>11</sub> | U <sub>22</sub> | U <sub>33</sub> | U <sub>23</sub> | U <sub>13</sub> | U <sub>12</sub> |
|------|-----------------|-----------------|-----------------|-----------------|-----------------|-----------------|
| C00S | 21.2(17)        | 34.2(18)        | 25.9(18)        | -2.2(15)        | 10.6(14)        | 0.7(14)         |
| C00T | 26.5(19)        | 33.5(19)        | 26.5(19)        | 1.4(15)         | 3.0(15)         | -3.9(15)        |
| C16  | 28.9(19)        | 31.6(18)        | 24.5(18)        | -1.3(14)        | 10.7(15)        | -2.0(15)        |
| C21  | 32(2)           | 37(2)           | 26.5(19)        | 3.3(16)         | 10.7(16)        | 11.2(16)        |
| C15  | 43(2)           | 34(2)           | 31(2)           | -0.7(16)        | 18.5(18)        | 1.7(17)         |
| C00X | 24.3(19)        | 44(2)           | 27.8(19)        | -1.9(17)        | 2.6(15)         | -0.8(16)        |
| C4   | 58(3)           | 31.4(19)        | 34(2)           | -1.3(16)        | 28(2)           | -3.5(18)        |
| C00Z | 23.8(18)        | 40(2)           | 27.5(19)        | -0.9(16)        | 8.3(15)         | 3.6(16)         |
| C010 | 20.0(16)        | 29.9(17)        | 24.9(17)        | 2.9(14)         | 10.1(14)        | 3.4(13)         |
| C011 | 36(2)           | 31.5(19)        | 25.0(19)        | 4.5(15)         | 10.9(16)        | 1.0(15)         |
| C22  | 25.7(18)        | 27.2(17)        | 24.6(17)        | 4.0(14)         | 10.2(14)        | 7.9(14)         |
| C3   | 49(3)           | 34(2)           | 29(2)           | 3.1(16)         | 20.4(19)        | 1.2(18)         |
| C1   | 31(2)           | 44(2)           | 26.6(19)        | 1.7(17)         | 8.9(16)         | 4.2(17)         |
| C015 | 22.8(18)        | 40(2)           | 27.3(18)        | 6.7(15)         | 13.1(15)        | 5.7(15)         |
| C24  | 23.4(18)        | 30.7(18)        | 30.1(19)        | -4.6(15)        | 4.0(15)         | 4.5(15)         |
| C17  | 30.0(19)        | 26.1(16)        | 27.4(18)        | 7.5(14)         | 16.3(15)        | 10.0(14)        |
| C018 | 35(2)           | 46(2)           | 24.1(19)        | 1.6(17)         | 6.1(17)         | 8.3(18)         |
| C019 | 33(2)           | 53(3)           | 24.4(19)        | -1.1(18)        | 7.5(16)         | 8.1(18)         |
| C14  | 46(2)           | 29.6(19)        | 31(2)           | 1.7(16)         | 20.7(18)        | 6.5(17)         |
| C18  | 45(2)           | 31.6(19)        | 33(2)           | 9.9(16)         | 23.7(18)        | 13.2(17)        |
| C13  | 44(2)           | 34(2)           | 42(2)           | 0.7(17)         | 29(2)           | 7.7(17)         |
| C12  | 30(2)           | 34.7(19)        | 35(2)           | 3.3(16)         | 19.3(17)        | 6.6(16)         |
| C20  | 49(3)           | 47(2)           | 26(2)           | 2.8(18)         | 15.5(19)        | 16(2)           |
| C01F | 34(2)           | 54(3)           | 26(2)           | 4.3(18)         | 9.9(17)         | 1.1(19)         |
| C01G | 36(2)           | 44(2)           | 32(2)           | 4.5(18)         | 14.2(18)        | 3.1(18)         |
| C01H | 29(2)           | 60(3)           | 28(2)           | -1.5(19)        | 6.7(17)         | 2.7(19)         |
| C19  | 56(3)           | 40(2)           | 28(2)           | 9.1(17)         | 23(2)           | 19(2)           |
| C01J | 37(2)           | 48(2)           | 35(2)           | 1.1(18)         | 20.1(18)        | 10.7(18)        |

**Table S21. Anisotropic Displacement Parameters ( $\text{\AA}^2 \times 10^3$ ) for 2x. The Anisotropic displacement factor exponent takes the form:  $-2\pi^2[h^2a^*U_{11}+2hka^*b^*U_{12}+\dots]$ .**

| Atom | U <sub>11</sub> | U <sub>22</sub> | U <sub>33</sub> | U <sub>23</sub> | U <sub>13</sub> | U <sub>12</sub> |
|------|-----------------|-----------------|-----------------|-----------------|-----------------|-----------------|
| C25  | 39(3)           | 41(2)           | 44(3)           | 3(2)            | -3(2)           | 12.6(19)        |

**Table S22. Bond Lengths for 2x.**

| Atom | Atom | Length/ $\text{\AA}$ | Atom | Atom | Length/ $\text{\AA}$ |
|------|------|----------------------|------|------|----------------------|
| S001 | C00L | 1.798(4)             | C7   | C8   | 1.467(5)             |
| S001 | C00O | 1.744(4)             | C2   | C3   | 1.389(5)             |
| S1   | C9   | 1.796(3)             | C2   | C1   | 1.488(5)             |
| S1   | C17  | 1.745(4)             | C00K | C00T | 1.376(6)             |
| O003 | C00J | 1.203(4)             | C00L | C010 | 1.587(5)             |
| N004 | C00A | 1.279(4)             | C5   | C4   | 1.394(6)             |
| N004 | C00S | 1.409(4)             | C00O | C00S | 1.400(5)             |
| N1   | C8   | 1.281(4)             | C00O | C00X | 1.389(5)             |
| N1   | C22  | 1.402(4)             | C23  | C1   | 1.504(5)             |
| O1   | C1   | 1.203(5)             | C23  | C24  | 1.560(5)             |
| C007 | C009 | 1.402(5)             | C00Q | C00S | 1.392(5)             |
| C007 | C00J | 1.482(5)             | C00Q | C01F | 1.382(5)             |
| C007 | C00K | 1.406(5)             | C10  | C24  | 1.548(5)             |
| C008 | C009 | 1.402(5)             | C16  | C15  | 1.379(5)             |
| C008 | C00B | 1.396(5)             | C21  | C22  | 1.393(5)             |
| C009 | C00A | 1.468(5)             | C21  | C20  | 1.381(6)             |
| C00A | C00L | 1.503(5)             | C15  | C14  | 1.392(6)             |
| C00B | C00T | 1.392(6)             | C00X | C01H | 1.406(6)             |
| C6   | C7   | 1.407(5)             | C4   | C3   | 1.370(6)             |
| C6   | C5   | 1.387(5)             | C00Z | C019 | 1.409(5)             |
| C00D | C00Z | 1.378(5)             | C010 | C015 | 1.537(5)             |
| C00D | C010 | 1.504(5)             | C011 | C01G | 1.394(5)             |
| C00D | C011 | 1.392(5)             | C22  | C17  | 1.396(5)             |
| C9   | C8   | 1.507(5)             | C015 | C01J | 1.515(6)             |

**Table S22. Bond Lengths for 2x.**

| Atom | Atom | Length/Å | Atom | Atom | Length/Å |
|------|------|----------|------|------|----------|
| C9   | C23  | 1.550(5) | C24  | C25  | 1.520(6) |
| C9   | C10  | 1.578(5) | C17  | C18  | 1.391(5) |
| C11  | C10  | 1.507(5) | C018 | C019 | 1.389(6) |
| C11  | C16  | 1.392(5) | C018 | C01G | 1.381(6) |
| C11  | C12  | 1.386(5) | C14  | C13  | 1.379(6) |
| C00G | C00J | 1.499(5) | C18  | C19  | 1.377(6) |
| C00G | C00L | 1.548(5) | C13  | C12  | 1.387(6) |
| C00G | C015 | 1.568(5) | C20  | C19  | 1.397(7) |
| C7   | C2   | 1.405(5) | C01F | C01H | 1.379(6) |

**Table S23. Bond Angles for 2x.**

| Atom | Atom | Atom | Angle/°   | Atom | Atom | Atom | Angle/°  |
|------|------|------|-----------|------|------|------|----------|
| C00O | S001 | C00L | 98.24(17) | C00S | C00O | S001 | 119.9(3) |
| C17  | S1   | C9   | 97.81(17) | C00X | C00O | S001 | 120.2(3) |
| C00A | N004 | C00S | 121.3(3)  | C00X | C00O | C00S | 119.9(4) |
| C8   | N1   | C22  | 121.0(3)  | C9   | C23  | C24  | 88.8(3)  |
| C009 | C007 | C00J | 122.3(3)  | C1   | C23  | C9   | 116.4(3) |
| C009 | C007 | C00K | 120.2(3)  | C1   | C23  | C24  | 116.7(3) |
| C00K | C007 | C00J | 117.4(3)  | C01F | C00Q | C00S | 120.6(4) |
| C00B | C008 | C009 | 120.5(3)  | C11  | C10  | C9   | 120.2(3) |
| C007 | C009 | C008 | 118.8(3)  | C11  | C10  | C24  | 121.2(3) |
| C007 | C009 | C00A | 122.3(3)  | C24  | C10  | C9   | 88.3(3)  |
| C008 | C009 | C00A | 118.8(3)  | C00O | C00S | N004 | 123.5(3) |
| N004 | C00A | C009 | 117.9(3)  | C00Q | C00S | N004 | 116.7(3) |
| N004 | C00A | C00L | 124.0(3)  | C00Q | C00S | C00O | 119.7(3) |
| C009 | C00A | C00L | 117.9(3)  | C00K | C00T | C00B | 120.5(4) |
| C00T | C00B | C008 | 119.8(3)  | C15  | C16  | C11  | 120.5(4) |
| C5   | C6   | C7   | 120.2(4)  | C20  | C21  | C22  | 120.6(4) |
| C00Z | C00D | C010 | 122.0(3)  | C16  | C15  | C14  | 120.2(4) |



**Table S23. Bond Angles for 2x.**

| Atom Atom Atom | Angle/°  | Atom Atom Atom | Angle/°  |
|----------------|----------|----------------|----------|
| C00Z C00D C011 | 119.3(3) | C00O C00X C01H | 119.1(4) |
| C011 C00D C010 | 118.6(3) | C3 C4 C5       | 119.7(4) |
| C8 C9 S1       | 109.0(2) | C00D C00Z C019 | 120.7(4) |
| C8 C9 C23      | 119.5(3) | C00D C010 C00L | 119.1(3) |
| C8 C9 C10      | 115.6(3) | C00D C010 C015 | 122.9(3) |
| C23 C9 S1      | 108.6(2) | C015 C010 C00L | 88.6(3)  |
| C23 C9 C10     | 88.1(2)  | C00D C011 C01G | 120.5(4) |
| C10 C9 S1      | 114.9(2) | C21 C22 N1     | 117.3(3) |
| C16 C11 C10    | 118.9(3) | C21 C22 C17    | 119.2(3) |
| C12 C11 C10    | 121.8(3) | C17 C22 N1     | 123.3(3) |
| C12 C11 C16    | 119.2(3) | C4 C3 C2       | 121.0(4) |
| C00J C00G C00L | 116.5(3) | O1 C1 C2       | 121.6(4) |
| C00J C00G C015 | 114.9(3) | O1 C1 C23      | 119.2(4) |
| C00L C00G C015 | 88.9(3)  | C2 C1 C23      | 119.0(3) |
| C6 C7 C8       | 119.2(3) | C010 C015 C00G | 88.8(3)  |
| C2 C7 C6       | 118.5(3) | C01J C015 C00G | 119.5(3) |
| C2 C7 C8       | 122.3(3) | C01J C015 C010 | 118.5(3) |
| C7 C2 C1       | 122.4(3) | C10 C24 C23    | 88.8(3)  |
| C3 C2 C7       | 120.1(4) | C25 C24 C23    | 121.6(4) |
| C3 C2 C1       | 117.4(3) | C25 C24 C10    | 116.9(3) |
| O003 C00J C007 | 122.0(3) | C22 C17 S1     | 120.1(3) |
| O003 C00J C00G | 118.7(3) | C18 C17 S1     | 119.8(3) |
| C007 C00J C00G | 119.2(3) | C18 C17 C22    | 120.0(4) |
| C00T C00K C007 | 120.0(4) | C01G C018 C019 | 120.2(4) |
| C00A C00L S001 | 109.6(2) | C018 C019 C00Z | 119.2(4) |
| C00A C00L C00G | 119.2(3) | C13 C14 C15    | 119.1(4) |
| C00A C00L C010 | 115.5(3) | C19 C18 C17    | 120.2(4) |
| C00G C00L S001 | 107.8(2) | C14 C13 C12    | 120.9(4) |
| C00G C00L C010 | 87.8(3)  | C11 C12 C13    | 119.9(4) |

**Table S23. Bond Angles for 2x.**

| Atom | Atom | Atom | Angle/°  | Atom | Atom | Atom | Angle/°  |
|------|------|------|----------|------|------|------|----------|
| C010 | C00L | S001 | 115.5(2) | C21  | C20  | C19  | 119.8(4) |
| N1   | C8   | C9   | 123.8(3) | C01H | C01F | C00Q | 119.6(4) |
| N1   | C8   | C7   | 117.8(3) | C018 | C01G | C011 | 120.0(4) |
| C7   | C8   | C9   | 118.3(3) | C01F | C01H | C00X | 120.9(4) |
| C6   | C5   | C4   | 120.4(4) | C18  | C19  | C20  | 120.0(4) |

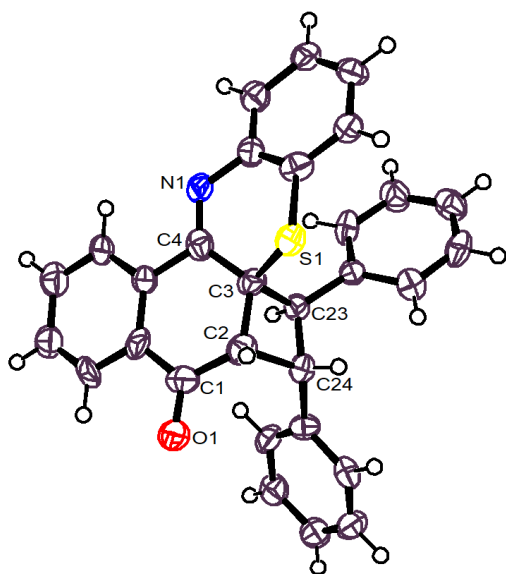**Table S24. Crystal data and structure refinement for 2y.**

|                     |                                                                              |
|---------------------|------------------------------------------------------------------------------|
| Identification code | 2y                                                                           |
| CCDC Number         | 2403402                                                                      |
| Empirical formula   | C <sub>60</sub> H <sub>42</sub> N <sub>2</sub> O <sub>2</sub> S <sub>2</sub> |
| Formula weight      | 887.07                                                                       |
| Temperature/K       | 120.0                                                                        |
| Crystal system      | monoclinic                                                                   |
| Space group         | P2 <sub>1</sub>                                                              |
| a/Å                 | 5.9514(19)                                                                   |
| b/Å                 | 16.600(5)                                                                    |
| c/Å                 | 22.163(7)                                                                    |
| $\alpha$ /°         | 90                                                                           |

|                                               |                                                                |
|-----------------------------------------------|----------------------------------------------------------------|
| $\beta/^\circ$                                | 90.368(14)                                                     |
| $\gamma/^\circ$                               | 90                                                             |
| Volume/ $\text{\AA}^3$                        | 2189.5(12)                                                     |
| Z                                             | 2                                                              |
| $\rho_{\text{calc}}/\text{g}/\text{cm}^3$     | 1.346                                                          |
| $\mu/\text{mm}^{-1}$                          | 0.172                                                          |
| F(000)                                        | 928.0                                                          |
| Crystal size/ $\text{mm}^3$                   | $0.02 \times 0.01 \times 0.008$                                |
| Radiation                                     | MoK $\alpha$ ( $\lambda = 0.71073$ )                           |
| $2\Theta$ range for data collection/ $^\circ$ | 4.42 to 59.148                                                 |
| Index ranges                                  | $-8 \leq h \leq 8, -23 \leq k \leq 23, -30 \leq l \leq 30$     |
| Reflections collected                         | 75484                                                          |
| Independent reflections                       | 12259 [ $R_{\text{int}} = 0.2866, R_{\text{sigma}} = 0.2275$ ] |
| Data/restraints/parameters                    | 12259/1/596                                                    |
| Goodness-of-fit on $F^2$                      | 1.024                                                          |
| Final R indexes [ $I \geq 2\sigma(I)$ ]       | $R_1 = 0.1177, wR_2 = 0.2794$                                  |
| Final R indexes [all data]                    | $R_1 = 0.2350, wR_2 = 0.3453$                                  |
| Largest diff. peak/hole / $e \text{\AA}^{-3}$ | 0.65/-0.50                                                     |
| Flack parameter                               | 0.08(10)                                                       |

**Table S25. Fractional Atomic Coordinates ( $\times 10^4$ ) and Equivalent Isotropic Displacement Parameters ( $\text{\AA}^2 \times 10^3$ ) for 2y.  $U_{\text{eq}}$  is defined as 1/3 of the trace of the orthogonalised  $U_{\text{ij}}$  tensor.**

| Atom | <i>x</i> | <i>y</i>   | <i>z</i>   | $U(\text{eq})$ |
|------|----------|------------|------------|----------------|
| S1   | 3425(5)  | 4562.6(16) | 8517.3(14) | 37.5(7)        |
| S1A  | 5292(5)  | 4770.7(18) | 3375.1(14) | 41.5(8)        |
| O1   | 4828(17) | 4077(5)    | 10718(4)   | 52(2)          |
| N1   | 8142(17) | 3836(5)    | 8431(4)    | 35(2)          |
| O1A  | 6507(16) | 4554(6)    | 5549(4)    | 55(2)          |
| N1A  | 928(17)  | 3874(6)    | 3654(4)    | 38(2)          |
| C22  | 6629(19) | 6086(6)    | 8793(5)    | 30(2)          |

**Table S25. Fractional Atomic Coordinates ( $\times 10^4$ ) and Equivalent Isotropic Displacement Parameters ( $\text{\AA}^2 \times 10^3$ ) for 2y.  $U_{\text{eq}}$  is defined as 1/3 of the trace of the orthogonalised  $U_{\text{H}}$  tensor.**

| Atom | <i>x</i>  | <i>y</i> | <i>z</i> | $U_{\text{eq}}$ |
|------|-----------|----------|----------|-----------------|
| C25  | 5143(18)  | 5882(7)  | 10360(5) | 33(2)           |
| C23  | 6448(19)  | 5439(6)  | 9272(5)  | 31(2)           |
| C16A | 3160(20)  | 4541(7)  | 2859(5)  | 39(3)           |
| C1A  | 5110(20)  | 4491(7)  | 5150(6)  | 41(3)           |
| C1   | 5600(20)  | 4069(7)  | 10207(5) | 41(3)           |
| C24A | 4575(19)  | 5894(6)  | 4643(5)  | 34(3)           |
| C22A | 2100(20)  | 6249(6)  | 3670(5)  | 33(2)           |
| C13  | 8040(20)  | 4688(7)  | 6885(5)  | 44(3)           |
| C16  | 5234(18)  | 4616(7)  | 7887(5)  | 37(3)           |
| C17A | 60(20)    | 6156(7)  | 3374(5)  | 39(3)           |
| C30A | 2120(20)  | 6042(7)  | 5570(5)  | 39(3)           |
| C12  | 8700(20)  | 4272(7)  | 7424(5)  | 39(3)           |
| C18  | 8720(20)  | 6697(8)  | 7995(6)  | 46(3)           |
| C6A  | 3160(20)  | 3964(7)  | 5187(5)  | 40(3)           |
| C5   | 8460(20)  | 3530(6)  | 9474(5)  | 33(2)           |
| C10  | 10380(20) | 3074(6)  | 9378(5)  | 35(3)           |
| C5A  | 1680(20)  | 3816(6)  | 4710(5)  | 37(3)           |
| C11A | 1230(20)  | 4162(7)  | 3066(6)  | 41(3)           |
| C14  | 5940(20)  | 5054(7)  | 6866(5)  | 44(3)           |
| C7   | 8760(20)  | 3207(7)  | 10540(6) | 46(3)           |
| C4   | 7360(20)  | 3969(6)  | 8948(6)  | 36(3)           |
| C19  | 7030(20)  | 7241(8)  | 7880(6)  | 45(3)           |
| C9   | 11470(20) | 2695(7)  | 9845(6)  | 47(3)           |
| C10A | -160(20)  | 3298(7)  | 4778(6)  | 40(3)           |
| C3A  | 3670(20)  | 4851(7)  | 4039(5)  | 39(3)           |
| C29A | 1670(20)  | 6402(7)  | 6132(6)  | 45(3)           |
| C3   | 5542(19)  | 4563(7)  | 9099(5)  | 34(2)           |

**Table S25. Fractional Atomic Coordinates ( $\times 10^4$ ) and Equivalent Isotropic Displacement Parameters ( $\text{\AA}^2 \times 10^3$ ) for 2y.  $U_{\text{eq}}$  is defined as 1/3 of the trace of the orthogonalised  $U_{\text{ij}}$  tensor.**

| Atom | <i>x</i>  | <i>y</i> | <i>z</i> | $U_{\text{eq}}$ |
|------|-----------|----------|----------|-----------------|
| C23A | 2600(20)  | 5709(7)  | 4203(5)  | 37(3)           |
| C17  | 8590(20)  | 6137(7)  | 8441(6)  | 45(3)           |
| C20A | 3040(20)  | 7300(9)  | 2947(6)  | 53(4)           |
| C30  | 7140(20)  | 5768(7)  | 10689(6) | 40(3)           |
| C4A  | 2106(19)  | 4162(7)  | 4098(6)  | 40(3)           |
| C11  | 7320(20)  | 4252(6)  | 7924(5)  | 36(3)           |
| C2   | 4420(20)  | 4549(7)  | 9712(5)  | 41(3)           |
| C8   | 10610(20) | 2777(7)  | 10435(6) | 47(3)           |
| C15  | 4500(20)  | 5017(7)  | 7367(5)  | 39(3)           |
| C2A  | 5410(20)  | 4978(7)  | 4582(5)  | 42(3)           |
| C6   | 7600(20)  | 3594(6)  | 10072(6) | 39(3)           |
| C27A | 5100(30)  | 7122(8)  | 6078(6)  | 55(4)           |
| C24  | 4650(20)  | 5493(6)  | 9766(5)  | 38(3)           |
| C29  | 7520(20)  | 6150(7)  | 11222(6) | 41(3)           |
| C21  | 4860(20)  | 6659(7)  | 8691(6)  | 46(3)           |
| C21A | 3520(20)  | 6838(7)  | 3450(6)  | 42(3)           |
| C26  | 3570(20)  | 6412(6)  | 10619(5) | 36(3)           |
| C25A | 4040(20)  | 6238(6)  | 5240(6)  | 41(3)           |
| C19A | 1000(30)  | 7160(7)  | 2649(6)  | 50(3)           |
| C15A | 3370(20)  | 4780(7)  | 2247(6)  | 48(3)           |
| C26A | 5570(20)  | 6785(7)  | 5512(6)  | 45(3)           |
| C7A  | 2750(30)  | 3611(7)  | 5751(6)  | 51(3)           |
| C12A | -440(20)  | 3968(7)  | 2632(5)  | 40(3)           |
| C9A  | -510(30)  | 2951(7)  | 5334(6)  | 48(3)           |
| C20  | 5130(20)  | 7209(7)  | 8231(6)  | 45(3)           |
| C13A | -270(20)  | 4212(8)  | 2043(6)  | 45(3)           |
| C18A | -560(30)  | 6585(8)  | 2860(6)  | 48(3)           |

**Table S25. Fractional Atomic Coordinates ( $\times 10^4$ ) and Equivalent Isotropic Displacement Parameters ( $\text{\AA}^2 \times 10^3$ ) for 2y.  $U_{\text{eq}}$  is defined as 1/3 of the trace of the orthogonalised  $U_{\text{ij}}$  tensor.**

| Atom | <i>x</i> | <i>y</i> | <i>z</i> | $U_{\text{eq}}$ |
|------|----------|----------|----------|-----------------|
| C28  | 5930(20) | 6672(7)  | 11462(6) | 46(3)           |
| C28A | 3190(30) | 6932(7)  | 6393(6)  | 55(4)           |
| C8A  | 900(30)  | 3102(8)  | 5816(7)  | 55(4)           |
| C27  | 3950(20) | 6794(7)  | 11156(6) | 48(3)           |
| C14A | 1560(20) | 4582(9)  | 1847(6)  | 56(4)           |

**Table S26. Anisotropic Displacement Parameters ( $\text{\AA}^2 \times 10^3$ ) for 2y. The Anisotropic displacement factor exponent takes the form:  $-2\pi^2[h^2a^*U_{11}+2hka^*b^*U_{12}+\dots]$ .**

| Atom | $U_{11}$ | $U_{22}$ | $U_{33}$ | $U_{23}$ | $U_{13}$ | $U_{12}$ |
|------|----------|----------|----------|----------|----------|----------|
| S1   | 35.7(14) | 32.0(14) | 44.9(17) | -2.9(13) | 0.0(12)  | -0.6(12) |
| S1A  | 43.1(16) | 40.9(16) | 40.6(17) | -6.2(13) | 7.4(13)  | 0.8(13)  |
| O1   | 84(7)    | 30(4)    | 42(5)    | -2(4)    | 14(5)    | -3(4)    |
| N1   | 46(6)    | 25(4)    | 35(6)    | -4(4)    | -6(4)    | 2(4)     |
| O1A  | 63(6)    | 53(5)    | 49(5)    | -2(5)    | -14(5)   | 12(5)    |
| N1A  | 52(6)    | 29(5)    | 33(5)    | -1(4)    | 1(5)     | 0(4)     |
| C22  | 39(6)    | 25(5)    | 26(6)    | -3(4)    | -5(5)    | -1(4)    |
| C25  | 32(6)    | 36(6)    | 30(6)    | -5(5)    | 2(5)     | -5(5)    |
| C23  | 35(6)    | 29(5)    | 29(6)    | 0(4)     | -3(5)    | 2(4)     |
| C16A | 49(7)    | 35(6)    | 33(6)    | -7(5)    | 8(5)     | 0(6)     |
| C1A  | 50(7)    | 34(6)    | 39(7)    | 1(5)     | 4(6)     | 12(6)    |
| C1   | 60(8)    | 28(5)    | 35(7)    | -6(5)    | 13(6)    | -18(5)   |
| C24A | 38(6)    | 30(5)    | 34(6)    | -10(5)   | -1(5)    | -7(5)    |
| C22A | 46(7)    | 29(5)    | 25(6)    | -1(4)    | -2(5)    | -3(5)    |
| C13  | 66(8)    | 30(6)    | 36(7)    | -4(5)    | 6(6)     | 0(6)     |
| C16  | 36(6)    | 36(6)    | 40(6)    | -4(5)    | 12(5)    | -12(5)   |
| C17A | 46(7)    | 36(6)    | 36(7)    | -1(5)    | 5(6)     | 3(5)     |
| C30A | 45(7)    | 38(6)    | 36(7)    | -6(5)    | -6(5)    | 1(5)     |

**Table S26. Anisotropic Displacement Parameters ( $\text{\AA}^2 \times 10^3$ ) for 2y. The Anisotropic displacement factor exponent takes the form:  $-2\pi^2[h^2a^2U_{11}+2hka^*b^*U_{12}+\dots]$ .**

| Atom | U <sub>11</sub> | U <sub>22</sub> | U <sub>33</sub> | U <sub>23</sub> | U <sub>13</sub> | U <sub>12</sub> |
|------|-----------------|-----------------|-----------------|-----------------|-----------------|-----------------|
| C12  | 44(7)           | 32(6)           | 41(7)           | -1(5)           | -2(5)           | -5(5)           |
| C18  | 47(7)           | 45(7)           | 45(8)           | 9(6)            | 6(6)            | 0(6)            |
| C6A  | 41(6)           | 42(6)           | 35(7)           | -3(5)           | -4(5)           | 6(5)            |
| C5   | 45(7)           | 21(5)           | 33(6)           | 1(4)            | 4(5)            | -7(5)           |
| C10  | 45(7)           | 22(5)           | 38(6)           | 3(5)            | 2(5)            | -5(5)           |
| C5A  | 53(7)           | 28(5)           | 31(6)           | -1(5)           | -5(5)           | 5(5)            |
| C11A | 39(6)           | 31(6)           | 53(8)           | -5(5)           | 8(6)            | -2(5)           |
| C14  | 71(9)           | 37(6)           | 26(6)           | 0(5)            | -2(6)           | -5(6)           |
| C7   | 80(10)          | 23(5)           | 34(7)           | 11(5)           | 0(6)            | -10(6)          |
| C4   | 40(6)           | 27(5)           | 41(7)           | 2(5)            | -5(5)           | -6(5)           |
| C19  | 56(8)           | 40(6)           | 40(7)           | 6(5)            | -2(6)           | -13(6)          |
| C9   | 53(8)           | 35(6)           | 52(8)           | 4(6)            | -5(7)           | -1(6)           |
| C10A | 51(7)           | 30(6)           | 38(7)           | 1(5)            | -2(6)           | 9(5)            |
| C3A  | 59(7)           | 27(5)           | 29(6)           | 2(5)            | 0(5)            | 9(5)            |
| C29A | 56(8)           | 44(7)           | 35(7)           | 6(5)            | 8(6)            | 2(6)            |
| C3   | 44(6)           | 25(5)           | 32(6)           | -6(5)           | 4(5)            | -6(5)           |
| C23A | 44(7)           | 29(5)           | 38(7)           | -10(5)          | -4(5)           | 0(5)            |
| C17  | 42(7)           | 34(6)           | 57(8)           | 5(6)            | -5(6)           | 14(5)           |
| C20A | 58(9)           | 60(8)           | 40(8)           | 17(6)           | 18(7)           | 13(7)           |
| C30  | 47(7)           | 26(5)           | 46(7)           | -4(5)           | 12(6)           | 5(5)            |
| C4A  | 33(6)           | 39(6)           | 49(8)           | -6(5)           | 5(5)            | -6(5)           |
| C11  | 41(6)           | 30(5)           | 36(7)           | -3(5)           | -11(5)          | 2(5)            |
| C2   | 47(7)           | 33(5)           | 42(7)           | -5(5)           | 2(5)            | 0(5)            |
| C8   | 62(9)           | 34(6)           | 44(8)           | 1(5)            | -7(7)           | 3(6)            |
| C15  | 43(7)           | 36(6)           | 37(7)           | -3(5)           | -2(5)           | 7(5)            |
| C2A  | 50(7)           | 40(6)           | 37(7)           | -6(5)           | -1(6)           | 4(5)            |
| C6   | 49(7)           | 18(5)           | 48(7)           | -5(5)           | 2(6)            | 0(5)            |
| C27A | 86(11)          | 42(7)           | 36(7)           | -9(6)           | -14(7)          | -14(7)          |

**Table S26. Anisotropic Displacement Parameters ( $\text{\AA}^2 \times 10^3$ ) for 2y. The Anisotropic displacement factor exponent takes the form:  $-2\pi^2[h^2a^2U_{11}+2hka*b*U_{12}+\dots]$ .**

| Atom | U <sub>11</sub> | U <sub>22</sub> | U <sub>33</sub> | U <sub>23</sub> | U <sub>13</sub> | U <sub>12</sub> |
|------|-----------------|-----------------|-----------------|-----------------|-----------------|-----------------|
| C24  | 53(8)           | 24(5)           | 37(7)           | 0(5)            | 2(6)            | 3(5)            |
| C29  | 50(7)           | 29(6)           | 43(7)           | -1(5)           | -3(6)           | -7(5)           |
| C21  | 54(8)           | 41(7)           | 41(8)           | 6(6)            | 0(6)            | 4(6)            |
| C21A | 46(7)           | 40(6)           | 41(7)           | -1(5)           | 9(6)            | 7(6)            |
| C26  | 41(7)           | 31(5)           | 35(6)           | 7(5)            | -9(5)           | -3(5)           |
| C25A | 61(8)           | 24(5)           | 37(7)           | -2(5)           | -4(6)           | 2(5)            |
| C19A | 79(10)          | 35(6)           | 36(7)           | -8(5)           | 10(7)           | 5(6)            |
| C15A | 63(8)           | 33(6)           | 47(7)           | -8(6)           | 23(6)           | 6(6)            |
| C26A | 62(8)           | 31(6)           | 40(7)           | -9(5)           | -7(6)           | 1(6)            |
| C7A  | 83(10)          | 29(6)           | 40(8)           | -4(5)           | -4(7)           | -2(6)           |
| C12A | 52(7)           | 29(5)           | 39(7)           | -7(5)           | -3(6)           | 0(5)            |
| C9A  | 72(9)           | 25(6)           | 48(8)           | -3(5)           | 3(7)            | -6(6)           |
| C20  | 49(7)           | 24(5)           | 63(9)           | -7(5)           | -5(7)           | 4(5)            |
| C13A | 50(8)           | 51(7)           | 35(7)           | -19(6)          | 1(6)            | 14(6)           |
| C18A | 67(9)           | 39(7)           | 39(7)           | 8(6)            | -5(7)           | 7(6)            |
| C28  | 67(9)           | 34(6)           | 35(7)           | -4(5)           | -4(6)           | -2(6)           |
| C28A | 95(11)          | 33(6)           | 36(7)           | -13(5)          | 4(8)            | 3(7)            |
| C8A  | 67(9)           | 36(7)           | 61(9)           | -3(6)           | 12(8)           | 0(7)            |
| C27  | 59(8)           | 36(6)           | 49(8)           | -2(6)           | 21(7)           | 7(6)            |
| C14A | 61(8)           | 69(9)           | 38(7)           | -15(7)          | -6(6)           | 23(8)           |

**Table S27. Bond Lengths for 2y.**

| Atom | Atom | Length/ $\text{\AA}$ | Atom | Atom | Length/ $\text{\AA}$ |
|------|------|----------------------|------|------|----------------------|
| S1   | C16  | 1.772(11)            | C18  | C17  | 1.360(18)            |
| S1   | C3   | 1.797(12)            | C6A  | C5A  | 1.396(17)            |
| S1A  | C16A | 1.745(12)            | C6A  | C7A  | 1.404(18)            |
| S1A  | C3A  | 1.771(12)            | C5   | C10  | 1.388(16)            |
| O1   | C1   | 1.225(14)            | C5   | C4   | 1.519(16)            |



**Table S27. Bond Lengths for 2y.**

| Atom | Atom | Length/Å  | Atom | Atom | Length/Å  |
|------|------|-----------|------|------|-----------|
| N1   | C4   | 1.258(15) | C5   | C6   | 1.428(16) |
| N1   | C11  | 1.406(15) | C10  | C9   | 1.371(17) |
| O1A  | C1A  | 1.217(15) | C5A  | C10A | 1.400(17) |
| N1A  | C11A | 1.401(16) | C5A  | C4A  | 1.496(17) |
| N1A  | C4A  | 1.297(15) | C11A | C12A | 1.417(18) |
| C22  | C23  | 1.514(15) | C14  | C15  | 1.411(17) |
| C22  | C17  | 1.411(17) | C7   | C8   | 1.330(19) |
| C22  | C21  | 1.434(17) | C7   | C6   | 1.399(17) |
| C25  | C30  | 1.402(17) | C4   | C3   | 1.503(16) |
| C25  | C24  | 1.494(15) | C19  | C20  | 1.377(18) |
| C25  | C26  | 1.407(16) | C9   | C8   | 1.414(19) |
| C23  | C3   | 1.597(15) | C10A | C9A  | 1.377(17) |
| C23  | C24  | 1.539(16) | C3A  | C23A | 1.602(15) |
| C16A | C11A | 1.389(16) | C3A  | C4A  | 1.480(17) |
| C16A | C15A | 1.420(17) | C3A  | C2A  | 1.599(18) |
| C1A  | C6A  | 1.451(18) | C29A | C28A | 1.39(2)   |
| C1A  | C2A  | 1.508(17) | C3   | C2   | 1.519(15) |
| C1   | C2   | 1.522(18) | C20A | C21A | 1.382(18) |
| C1   | C6   | 1.463(17) | C20A | C19A | 1.40(2)   |
| C24A | C23A | 1.551(16) | C30  | C29  | 1.358(17) |
| C24A | C2A  | 1.606(16) | C2   | C24  | 1.578(16) |
| C24A | C25A | 1.480(16) | C27A | C26A | 1.403(18) |
| C22A | C17A | 1.387(17) | C27A | C28A | 1.37(2)   |
| C22A | C23A | 1.511(16) | C29  | C28  | 1.392(18) |
| C22A | C21A | 1.384(17) | C21  | C20  | 1.379(18) |
| C13  | C12  | 1.434(17) | C26  | C27  | 1.367(18) |
| C13  | C14  | 1.387(19) | C25A | C26A | 1.417(17) |
| C16  | C11  | 1.381(16) | C19A | C18A | 1.41(2)   |
| C16  | C15  | 1.398(17) | C15A | C14A | 1.426(19) |

**Table S27. Bond Lengths for 2y.**

| Atom | Atom | Length/Å  | Atom | Atom | Length/Å  |
|------|------|-----------|------|------|-----------|
| C17A | C18A | 1.391(17) | C7A  | C8A  | 1.40(2)   |
| C30A | C29A | 1.410(17) | C12A | C13A | 1.373(18) |
| C30A | C25A | 1.400(18) | C9A  | C8A  | 1.38(2)   |
| C12  | C11  | 1.385(17) | C13A | C14A | 1.33(2)   |
| C18  | C19  | 1.375(18) | C28  | C27  | 1.37(2)   |

**Table S28. Bond Angles for 2y.**

| Atom | Atom | Atom | Angle/°   | Atom | Atom | Atom | Angle/°   |
|------|------|------|-----------|------|------|------|-----------|
| C16  | S1   | C3   | 98.0(5)   | C4A  | C3A  | C23A | 114.7(10) |
| C16A | S1A  | C3A  | 99.4(6)   | C4A  | C3A  | C2A  | 116.1(10) |
| C4   | N1   | C11  | 120.8(10) | C2A  | C3A  | S1A  | 106.3(8)  |
| C4A  | N1A  | C11A | 120.6(10) | C2A  | C3A  | C23A | 88.2(8)   |
| C17  | C22  | C23  | 119.5(10) | C28A | C29A | C30A | 120.6(13) |
| C17  | C22  | C21  | 118.8(10) | C23  | C3   | S1   | 114.0(8)  |
| C21  | C22  | C23  | 121.7(10) | C4   | C3   | S1   | 110.0(8)  |
| C30  | C25  | C24  | 124.0(10) | C4   | C3   | C23  | 114.1(9)  |
| C30  | C25  | C26  | 115.8(10) | C4   | C3   | C2   | 120.7(10) |
| C26  | C25  | C24  | 120.1(10) | C2   | C3   | S1   | 109.3(8)  |
| C22  | C23  | C3   | 120.2(9)  | C2   | C3   | C23  | 87.1(8)   |
| C22  | C23  | C24  | 120.7(9)  | C24A | C23A | C3A  | 91.1(9)   |
| C24  | C23  | C3   | 89.3(8)   | C22A | C23A | C24A | 121.3(10) |
| C11A | C16A | S1A  | 118.8(9)  | C22A | C23A | C3A  | 115.3(9)  |
| C11A | C16A | C15A | 121.2(12) | C18  | C17  | C22  | 119.5(11) |
| C15A | C16A | S1A  | 119.9(10) | C21A | C20A | C19A | 117.8(13) |
| O1A  | C1A  | C6A  | 123.6(11) | C29  | C30  | C25  | 121.6(11) |
| O1A  | C1A  | C2A  | 118.3(12) | N1A  | C4A  | C5A  | 116.9(10) |
| C6A  | C1A  | C2A  | 118.1(11) | N1A  | C4A  | C3A  | 123.7(11) |
| O1   | C1   | C2   | 119.2(12) | C3A  | C4A  | C5A  | 119.2(11) |
| O1   | C1   | C6   | 120.2(12) | C16  | C11  | N1   | 124.8(11) |

**Table S28. Bond Angles for 2y.**

| Atom Atom Atom | Angle/°   | Atom Atom Atom | Angle/°   |
|----------------|-----------|----------------|-----------|
| C6 C1 C2       | 120.5(10) | C16 C11 C12    | 118.7(11) |
| C23A C24A C2A  | 89.7(8)   | C12 C11 N1     | 116.5(10) |
| C25A C24A C23A | 118.2(10) | C1 C2 C24      | 115.2(10) |
| C25A C24A C2A  | 120.6(10) | C3 C2 C1       | 116.7(10) |
| C17A C22A C23A | 118.1(10) | C3 C2 C24      | 90.8(9)   |
| C21A C22A C17A | 116.7(11) | C7 C8 C9       | 121.1(12) |
| C21A C22A C23A | 125.2(11) | C16 C15 C14    | 118.6(11) |
| C14 C13 C12    | 118.6(11) | C1A C2A C24A   | 113.5(9)  |
| C11 C16 S1     | 118.7(9)  | C1A C2A C3A    | 118.4(10) |
| C11 C16 C15    | 122.3(10) | C3A C2A C24A   | 89.2(9)   |
| C15 C16 S1     | 118.9(9)  | C5 C6 C1       | 121.7(11) |
| C22A C17A C18A | 123.7(12) | C7 C6 C1       | 119.8(11) |
| C25A C30A C29A | 121.5(12) | C7 C6 C5       | 118.4(11) |
| C11 C12 C13    | 121.1(12) | C28A C27A C26A | 122.1(13) |
| C17 C18 C19    | 122.6(12) | C25 C24 C23    | 121.3(10) |
| C5A C6A C1A    | 124.3(11) | C25 C24 C2     | 120.9(9)  |
| C5A C6A C7A    | 119.2(12) | C23 C24 C2     | 87.1(8)   |
| C7A C6A C1A    | 116.4(11) | C30 C29 C28    | 120.9(12) |
| C10 C5 C4      | 119.7(10) | C20 C21 C22    | 117.9(12) |
| C10 C5 C6      | 118.8(11) | C20A C21A C22A | 123.3(13) |
| C6 C5 C4       | 121.5(10) | C27 C26 C25    | 122.6(11) |
| C9 C10 C5      | 121.3(11) | C30A C25A C24A | 124.0(11) |
| C6A C5A C10A   | 121.2(11) | C30A C25A C26A | 116.9(11) |
| C6A C5A C4A    | 120.5(11) | C26A C25A C24A | 119.1(12) |
| C10A C5A C4A   | 118.1(11) | C20A C19A C18A | 121.7(13) |
| N1A C11A C12A  | 117.3(10) | C16A C15A C14A | 117.4(12) |
| C16A C11A N1A  | 125.0(11) | C27A C26A C25A | 120.4(13) |
| C16A C11A C12A | 117.3(11) | C8A C7A C6A    | 119.0(13) |
| C13 C14 C15    | 120.7(12) | C13A C12A C11A | 121.4(12) |

**Table S28. Bond Angles for 2y.**

| Atom | Atom | Atom | Angle/°   | Atom | Atom | Atom | Angle/°   |
|------|------|------|-----------|------|------|------|-----------|
| C8   | C7   | C6   | 121.4(12) | C8A  | C9A  | C10A | 121.5(13) |
| N1   | C4   | C5   | 117.0(10) | C19  | C20  | C21  | 122.8(12) |
| N1   | C4   | C3   | 126.1(11) | C14A | C13A | C12A | 121.0(13) |
| C3   | C4   | C5   | 116.8(10) | C17A | C18A | C19A | 116.6(13) |
| C18  | C19  | C20  | 118.2(12) | C27  | C28  | C29  | 119.1(12) |
| C10  | C9   | C8   | 118.9(12) | C27A | C28A | C29A | 118.4(12) |
| C9A  | C10A | C5A  | 118.4(12) | C9A  | C8A  | C7A  | 120.5(13) |
| C23A | C3A  | S1A  | 118.3(8)  | C26  | C27  | C28  | 119.9(12) |
| C4A  | C3A  | S1A  | 111.2(8)  | C13A | C14A | C15A | 121.4(13) |

**Table S29. Hydrogen Atom Coordinates ( $\text{\AA} \times 10^4$ ) and Isotropic Displacement Parameters ( $\text{\AA}^2 \times 10^3$ ) for 2y.**

| Atom | x        | y       | z        | U(eq) |
|------|----------|---------|----------|-------|
| H23  | 7950.69  | 5378.9  | 9471.11  | 37    |
| H24A | 5673.76  | 6254.35 | 4435.7   | 41    |
| H13  | 9012.12  | 4712.49 | 6547.24  | 53    |
| H17A | -984.2   | 5778.41 | 3532.34  | 47    |
| H30A | 1088.85  | 5657.48 | 5410.26  | 47    |
| H12  | 10114.24 | 4006.23 | 7439.12  | 47    |
| H18  | 10030.7  | 6714.46 | 7753.33  | 55    |
| H10  | 10949.56 | 3023.89 | 8980.53  | 42    |
| H14  | 5479.56  | 5333.49 | 6512.77  | 53    |
| H7   | 8227.75  | 3253.68 | 10941.53 | 55    |
| H19  | 7161.73  | 7627.62 | 7565.94  | 54    |
| H9   | 12775.82 | 2383.13 | 9773.67  | 56    |
| H10A | -1139.75 | 3188.02 | 4448.02  | 48    |
| H29A | 304.64   | 6280.93 | 6334.82  | 54    |
| H23A | 1196.76  | 5626.67 | 4439.93  | 45    |
| H17  | 9811.65  | 5780.98 | 8514.42  | 54    |

**Table S29. Hydrogen Atom Coordinates ( $\text{\AA}\times 10^4$ ) and Isotropic Displacement Parameters ( $\text{\AA}^2\times 10^3$ ) for 2y.**

| Atom | x        | y       | z        | U(eq) |
|------|----------|---------|----------|-------|
| H20A | 4055.26  | 7698.79 | 2808.74  | 63    |
| H30  | 8252.89  | 5415.1  | 10534.73 | 48    |
| H2   | 2804.63  | 4387.16 | 9674.44  | 49    |
| H8   | 11356.79 | 2520.19 | 10762.47 | 56    |
| H15  | 3050.23  | 5259.3  | 7352.06  | 47    |
| H2A  | 6999.59  | 4950.48 | 4437.9   | 51    |
| H27A | 6136.9   | 7494.73 | 6248.88  | 66    |
| H24  | 3272.91  | 5747.2  | 9589.71  | 46    |
| H29  | 8887.27  | 6058.54 | 11433.61 | 49    |
| H21  | 3548.63  | 6658.46 | 8931.9   | 55    |
| H21A | 4907     | 6930.41 | 3655.82  | 51    |
| H26  | 2197.28  | 6507.8  | 10410.75 | 43    |
| H19A | 655.07   | 7458.96 | 2295.31  | 60    |
| H15A | 4654.92  | 5060.98 | 2108.66  | 57    |
| H26A | 6917.34  | 6923.26 | 5310.35  | 54    |
| H7A  | 3721.69  | 3716.11 | 6084.51  | 61    |
| H12A | -1713.03 | 3661.83 | 2752.48  | 48    |
| H9A  | -1756.11 | 2600.04 | 5385.83  | 58    |
| H20  | 3952.83  | 7582.99 | 8153.19  | 54    |
| H13A | -1477.64 | 4113.75 | 1770.65  | 54    |
| H18A | -1951.89 | 6495.42 | 2660.36  | 58    |
| H28  | 6211.55  | 6941.18 | 11833.33 | 55    |
| H28A | 2923.88  | 7157.3  | 6779.51  | 66    |
| H8A  | 604.51   | 2858.69 | 6195.42  | 66    |
| H27  | 2836.63  | 7142.5  | 11317.56 | 57    |
| H14A | 1672.28  | 4719.19 | 1432.2   | 67    |

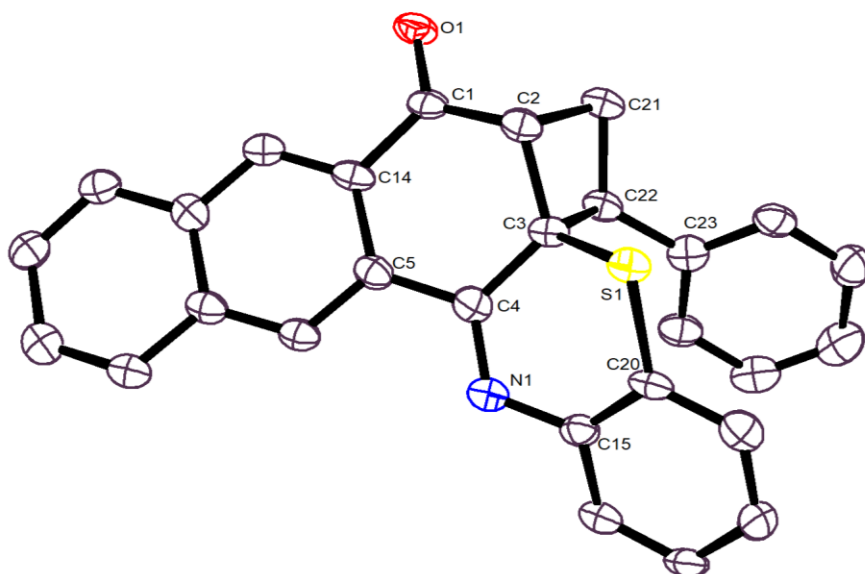

**Table S30. Crystal data and structure refinement for 2ad.**

|                       |                                        |
|-----------------------|----------------------------------------|
| Identification code   | <b>2ad</b>                             |
| CCDC Number           | <b>2332711</b>                         |
| Empirical formula     | <b>C<sub>28</sub>H<sub>19</sub>NOS</b> |
| Formula weight        | 417.50                                 |
| Temperature/K         | 110.00                                 |
| Crystal system        | monoclinic                             |
| Space group           | P2 <sub>1</sub> /c                     |
| a/Å                   | 20.812(7)                              |
| b/Å                   | 7.486(3)                               |
| c/Å                   | 13.413(4)                              |
| α/°                   | 90                                     |
| β/°                   | 105.313(7)                             |
| γ/°                   | 90                                     |
| Volume/Å <sup>3</sup> | 2015.5(11)                             |

|                                                                |                                                               |
|----------------------------------------------------------------|---------------------------------------------------------------|
| Z                                                              | 4                                                             |
| $\rho_{\text{calc}}/\text{cm}^3$                               | 1.376                                                         |
| $\mu/\text{mm}^{-1}$                                           | 0.182                                                         |
| F(000)                                                         | 872.0                                                         |
| Crystal size/ $\text{mm}^3$                                    | $0.20 \times 0.12 \times 0.08$                                |
| Radiation                                                      | MoK $\alpha$ ( $\lambda = 0.71073$ )                          |
| 2 $\Theta$ range for data collection/ $^\circ$ 6.288 to 59.364 |                                                               |
| Index ranges                                                   | $-28 \leq h \leq 28, -9 \leq k \leq 9, -17 \leq l \leq 15$    |
| Reflections collected                                          | 13296                                                         |
| Independent reflections                                        | 4465 [ $R_{\text{int}} = 0.1749, R_{\text{sigma}} = 0.2108$ ] |
| Data/restraints/parameters                                     | 4465/0/281                                                    |
| Goodness-of-fit on $F^2$                                       | 1.024                                                         |
| Final R indexes [ $I \geq 2\sigma(I)$ ]                        | $R_1 = 0.0915, wR_2 = 0.2075$                                 |
| Final R indexes [all data]                                     | $R_1 = 0.1384, wR_2 = 0.2539$                                 |
| Largest diff. peak/hole / $e \text{ \AA}^{-3}$ 0.56/-0.47      |                                                               |

**Table S31. Fractional Atomic Coordinates ( $\times 10^4$ ) and Equivalent Isotropic Displacement Parameters ( $\text{\AA}^2 \times 10^3$ ) for 2ad.  $U_{\text{eq}}$  is defined as 1/3 of the trace of the orthogonalised  $U_{\text{IJ}}$  tensor.**

| Atom | $x$        | $y$        | $z$       | $U(\text{eq})$ |
|------|------------|------------|-----------|----------------|
| S1   | 2095.6(5)  | 2166.8(13) | 6023.2(8) | 24.7(3)        |
| O1   | 3973.1(14) | 4542(4)    | 4589(2)   | 30.1(7)        |
| N1   | 2923.0(17) | 4294(4)    | 7887(3)   | 26.0(8)        |

**Table S31. Fractional Atomic Coordinates ( $\times 10^4$ ) and Equivalent Isotropic Displacement Parameters ( $\text{\AA}^2 \times 10^3$ ) for 2ad.  $U_{\text{eq}}$  is defined as 1/3 of the trace of the orthogonalised  $U_{\text{IJ}}$  tensor.**

| Atom | $x$        | $y$     | $z$     | $U(\text{eq})$ |
|------|------------|---------|---------|----------------|
| C4   | 3150(2)    | 4031(5) | 7084(3) | 24.3(9)        |
| C3   | 2714.8(19) | 3847(5) | 6002(3) | 23.2(8)        |
| C20  | 1800(2)    | 3121(5) | 7018(3) | 25.4(9)        |
| C9   | 6107(2)    | 3845(5) | 9595(3) | 28.4(9)        |
| C14  | 4174(2)    | 4101(5) | 6395(3) | 24.2(9)        |
| C22  | 2415(2)    | 5603(5) | 5392(3) | 24.3(9)        |
| C15  | 2235.4(19) | 4141(5) | 7787(3) | 24.3(9)        |
| C5   | 3882(2)    | 3954(5) | 7250(3) | 24.0(9)        |
| C12  | 5279(2)    | 4101(5) | 7571(3) | 24.7(9)        |
| C16  | 1982(2)    | 4954(6) | 8542(3) | 27.2(9)        |
| C19  | 1140(2)    | 2879(5) | 7034(3) | 28.4(9)        |
| C23  | 1741(2)    | 6310(5) | 5412(3) | 27.6(9)        |
| C1   | 3752(2)    | 4105(5) | 5317(3) | 23.5(9)        |
| C13  | 4855(2)    | 4207(5) | 6573(3) | 25.6(9)        |
| C2   | 3041(2)    | 3469(5) | 5113(3) | 25.9(9)        |
| C21  | 2540(2)    | 4768(6) | 4408(3) | 29.1(9)        |
| C10  | 6381(2)    | 4185(5) | 8751(3) | 27.1(9)        |
| C7   | 4996(2)    | 3835(5) | 8418(3) | 24.8(9)        |
| C11  | 5982(2)    | 4283(5) | 7760(3) | 27.0(9)        |



**Table S31. Fractional Atomic Coordinates ( $\times 10^4$ ) and Equivalent Isotropic Displacement Parameters ( $\text{\AA}^2 \times 10^3$ ) for 2ad.  $U_{\text{eq}}$  is defined as 1/3 of the trace of the orthogonalised  $U_{\text{IJ}}$  tensor.**

| Atom | $x$     | $y$     | $z$     | $U(\text{eq})$ |
|------|---------|---------|---------|----------------|
| C28  | 1692(2) | 7472(5) | 6198(3) | 29.8(10)       |
| C8   | 5433(2) | 3664(5) | 9425(3) | 26.9(9)        |
| C17  | 1326(2) | 4735(6) | 8553(3) | 28.8(9)        |
| C6   | 4302(2) | 3794(5) | 8228(3) | 25.4(9)        |
| C24  | 1165(2) | 5791(6) | 4671(3) | 29.2(10)       |
| C27  | 1068(2) | 8073(6) | 6254(4) | 35.4(10)       |
| C18  | 908(2)  | 3684(6) | 7799(3) | 30.0(10)       |
| C26  | 496(2)  | 7586(6) | 5507(4) | 40.0(12)       |
| C25  | 549(2)  | 6437(6) | 4716(3) | 36.1(11)       |

**Table S32. Anisotropic Displacement Parameters ( $\text{\AA}^2 \times 10^3$ ) for 2ad. The Anisotropic displacement factor exponent takes the form:  $-2\pi^2[h^2a^*{}^2U_{11}+2hka^*b^*U_{12}+\dots]$ .**

| Atom | $U_{11}$ | $U_{22}$ | $U_{33}$ | $U_{23}$ | $U_{13}$ | $U_{12}$ |
|------|----------|----------|----------|----------|----------|----------|
| S1   | 32.1(6)  | 22.2(5)  | 21.0(6)  | -1.5(4)  | 9.0(4)   | -1.5(4)  |
| O1   | 36.9(17) | 37.7(17) | 17.4(16) | 1.6(12)  | 10.1(12) | -4.9(12) |
| N1   | 32.7(19) | 25.9(17) | 20.1(19) | 0.5(13)  | 8.1(14)  | -0.5(14) |
| C4   | 29(2)    | 20.9(18) | 23(2)    | 1.5(15)  | 7.1(16)  | -4.9(15) |
| C3   | 32(2)    | 20.5(19) | 19(2)    | -0.2(15) | 9.8(16)  | 1.6(15)  |
| C20  | 37(2)    | 26(2)    | 14(2)    | 1.1(15)  | 8.2(15)  | 3.2(16)  |
| C9   | 34(2)    | 19.1(18) | 30(2)    | -2.6(16) | 4.7(17)  | 0.1(15)  |

**Table S32. Anisotropic Displacement Parameters ( $\text{\AA}^2 \times 10^3$ ) for 2ad. The Anisotropic displacement factor exponent takes the form:  $-2\pi^2[h^2a^2U_{11}+2hka^*b^*U_{12}+\dots]$ .**

| Atom | U <sub>11</sub> | U <sub>22</sub> | U <sub>33</sub> | U <sub>23</sub> | U <sub>13</sub> | U <sub>12</sub> |
|------|-----------------|-----------------|-----------------|-----------------|-----------------|-----------------|
| C14  | 37(2)           | 18.6(18)        | 17(2)           | -2.8(15)        | 8.3(16)         | -2.0(15)        |
| C22  | 33(2)           | 22.9(19)        | 18(2)           | 1.8(15)         | 7.1(16)         | 0.0(15)         |
| C15  | 29(2)           | 27(2)           | 19(2)           | 3.9(15)         | 8.5(15)         | 1.5(15)         |
| C5   | 31(2)           | 20.1(18)        | 20(2)           | -1.5(15)        | 5.1(15)         | 2.0(15)         |
| C12  | 30(2)           | 17.5(18)        | 25(2)           | -1.1(15)        | 4.7(16)         | 1.5(15)         |
| C16  | 38(2)           | 27(2)           | 17(2)           | 1.2(16)         | 6.7(16)         | 2.8(17)         |
| C19  | 35(2)           | 23(2)           | 26(2)           | 3.9(16)         | 6.0(17)         | -2.9(16)        |
| C23  | 35(2)           | 21(2)           | 28(2)           | 2.7(16)         | 11.1(17)        | 0.8(16)         |
| C1   | 33(2)           | 20.1(18)        | 19(2)           | -5.2(15)        | 9.4(16)         | 2.9(15)         |
| C13  | 33(2)           | 25(2)           | 22(2)           | -2.9(15)        | 11.0(16)        | -1.0(15)        |
| C2   | 33(2)           | 23.1(19)        | 21(2)           | -4.0(15)        | 7.3(16)         | -1.2(16)        |
| C21  | 37(2)           | 34(2)           | 16(2)           | 1.2(17)         | 7.6(16)         | -0.1(18)        |
| C10  | 30(2)           | 21.6(19)        | 31(2)           | -4.2(16)        | 10.5(17)        | 0.2(15)         |
| C7   | 36(2)           | 18.9(18)        | 20(2)           | 1.7(15)         | 8.1(16)         | 3.5(15)         |
| C11  | 33(2)           | 25(2)           | 27(2)           | -1.1(16)        | 13.1(17)        | 1.8(16)         |
| C28  | 42(2)           | 26(2)           | 24(2)           | 5.0(16)         | 12.4(18)        | -1.7(16)        |
| C8   | 37(2)           | 24(2)           | 21(2)           | 0.3(16)         | 9.4(16)         | -0.7(16)        |
| C17  | 38(2)           | 35(2)           | 16(2)           | 1.8(17)         | 11.6(16)        | 6.2(18)         |
| C6   | 33(2)           | 25(2)           | 19(2)           | -3.9(16)        | 7.8(16)         | 0.2(16)         |
| C24  | 38(2)           | 31(2)           | 20(2)           | 6.1(17)         | 10.0(17)        | -2.4(17)        |

**Table S32. Anisotropic Displacement Parameters ( $\text{\AA}^2 \times 10^3$ ) for 2ad. The Anisotropic displacement factor exponent takes the form:  $-2\pi^2[h^2a^{*2}U_{11}+2hka^*b^*U_{12}+\dots]$ .**

| Atom | U <sub>11</sub> | U <sub>22</sub> | U <sub>33</sub> | U <sub>23</sub> | U <sub>13</sub> | U <sub>12</sub> |
|------|-----------------|-----------------|-----------------|-----------------|-----------------|-----------------|
| C27  | 51(3)           | 25(2)           | 36(3)           | 3.0(18)         | 21(2)           | 5.7(19)         |
| C18  | 26(2)           | 37(2)           | 28(2)           | 4.5(18)         | 8.6(17)         | 1.2(17)         |
| C26  | 43(3)           | 34(2)           | 48(3)           | 12(2)           | 20(2)           | 13(2)           |
| C25  | 32(2)           | 41(3)           | 35(3)           | 7(2)            | 7.5(18)         | 1.8(19)         |

**Table S33. Bond Lengths for 2ad.**

| Atom | Atom | Length/ $\text{\AA}$ | Atom | Atom | Length/ $\text{\AA}$ |
|------|------|----------------------|------|------|----------------------|
| S1   | C3   | 1.806(4)             | C5   | C6   | 1.377(5)             |
| S1   | C20  | 1.762(4)             | C12  | C13  | 1.397(5)             |
| O1   | C1   | 1.230(5)             | C12  | C7   | 1.424(6)             |
| N1   | C4   | 1.300(5)             | C12  | C11  | 1.424(5)             |
| N1   | C15  | 1.406(5)             | C16  | C17  | 1.381(6)             |
| C4   | C3   | 1.501(5)             | C19  | C18  | 1.383(6)             |
| C4   | C5   | 1.481(5)             | C23  | C28  | 1.391(6)             |
| C3   | C22  | 1.586(5)             | C23  | C24  | 1.395(6)             |
| C3   | C2   | 1.545(5)             | C1   | C2   | 1.509(5)             |
| C20  | C15  | 1.405(5)             | C2   | C21  | 1.551(5)             |
| C20  | C19  | 1.390(6)             | C10  | C11  | 1.370(6)             |
| C9   | C10  | 1.418(6)             | C7   | C8   | 1.421(5)             |
| C9   | C8   | 1.367(6)             | C7   | C6   | 1.400(6)             |

**Table S33. Bond Lengths for 2ad.**

| Atom Atom Length/Å |     |          | Atom Atom Length/Å |     |          |
|--------------------|-----|----------|--------------------|-----|----------|
| C14                | C5  | 1.436(6) | C28                | C27 | 1.395(6) |
| C14                | C1  | 1.480(5) | C17                | C18 | 1.391(6) |
| C14                | C13 | 1.376(6) | C24                | C25 | 1.387(6) |
| C22                | C23 | 1.507(6) | C27                | C26 | 1.388(7) |
| C22                | C21 | 1.543(5) | C26                | C25 | 1.392(7) |
| C15                | C16 | 1.398(6) |                    |     |          |

**Table S34. Bond Angles for 2ad.**

| Atom Atom Atom Angle/° |     |     |           | Atom Atom Atom Angle/° |     |     |          |
|------------------------|-----|-----|-----------|------------------------|-----|-----|----------|
| C20                    | S1  | C3  | 97.07(19) | C7                     | C12 | C11 | 119.5(4) |
| C4                     | N1  | C15 | 119.5(3)  | C17                    | C16 | C15 | 121.3(4) |
| N1                     | C4  | C3  | 123.8(4)  | C18                    | C19 | C20 | 119.7(4) |
| N1                     | C4  | C5  | 117.7(3)  | C28                    | C23 | C22 | 119.2(4) |
| C5                     | C4  | C3  | 118.4(3)  | C28                    | C23 | C24 | 119.6(4) |
| C4                     | C3  | S1  | 107.4(3)  | C24                    | C23 | C22 | 121.2(4) |
| C4                     | C3  | C22 | 118.5(3)  | O1                     | C1  | C14 | 121.8(4) |
| C4                     | C3  | C2  | 119.2(3)  | O1                     | C1  | C2  | 119.7(3) |
| C22                    | C3  | S1  | 113.6(3)  | C14                    | C1  | C2  | 118.5(3) |
| C2                     | C3  | S1  | 110.2(3)  | C14                    | C13 | C12 | 121.6(4) |
| C2                     | C3  | C22 | 86.9(3)   | C3                     | C2  | C21 | 89.7(3)  |
| C15                    | C20 | S1  | 119.3(3)  | C1                     | C2  | C3  | 114.3(3) |

**Table S34. Bond Angles for 2ad.**

| Atom | Atom | Atom | Angle/°  | Atom | Atom | Atom | Angle/°  |
|------|------|------|----------|------|------|------|----------|
| C19  | C20  | S1   | 120.2(3) | C1   | C2   | C21  | 112.4(3) |
| C19  | C20  | C15  | 120.5(4) | C22  | C21  | C2   | 88.3(3)  |
| C8   | C9   | C10  | 119.7(4) | C11  | C10  | C9   | 121.0(4) |
| C5   | C14  | C1   | 120.9(4) | C8   | C7   | C12  | 118.4(4) |
| C13  | C14  | C5   | 120.0(3) | C6   | C7   | C12  | 118.8(3) |
| C13  | C14  | C1   | 119.2(3) | C6   | C7   | C8   | 122.8(4) |
| C23  | C22  | C3   | 121.5(3) | C10  | C11  | C12  | 119.9(4) |
| C23  | C22  | C21  | 121.7(3) | C23  | C28  | C27  | 119.8(4) |
| C21  | C22  | C3   | 88.5(3)  | C9   | C8   | C7   | 121.4(4) |
| C20  | C15  | N1   | 123.8(4) | C16  | C17  | C18  | 119.3(4) |
| C16  | C15  | N1   | 117.7(3) | C5   | C6   | C7   | 122.5(4) |
| C16  | C15  | C20  | 118.3(4) | C25  | C24  | C23  | 120.2(4) |
| C14  | C5   | C4   | 120.8(3) | C26  | C27  | C28  | 120.6(4) |
| C6   | C5   | C4   | 121.0(4) | C19  | C18  | C17  | 120.8(4) |
| C6   | C5   | C14  | 118.1(4) | C27  | C26  | C25  | 119.2(4) |
| C13  | C12  | C7   | 118.9(4) | C24  | C25  | C26  | 120.5(4) |
| C13  | C12  | C11  | 121.6(4) |      |      |      |          |

**Table S35. Torsion Angles for 2ad.**

| <b>A</b> | <b>B</b> | <b>C</b> | <b>D</b> | <b>Angle/°</b> | <b>A</b> | <b>B</b> | <b>C</b> | <b>D</b> | <b>Angle/°</b> |
|----------|----------|----------|----------|----------------|----------|----------|----------|----------|----------------|
| S1       | C3       | C22      | C23      | 35.4(5)        | C15      | C20      | C19      | C18      | 1.5(6)         |
| S1       | C3       | C22      | C21      | -91.5(3)       | C15      | C16      | C17      | C18      | 0.1(6)         |
| S1       | C3       | C2       | C1       | -150.5(3)      | C5       | C4       | C3       | S1       | 129.9(3)       |
| S1       | C3       | C2       | C21      | 94.9(3)        | C5       | C4       | C3       | C22      | -99.7(4)       |
| S1       | C20      | C15      | N1       | -7.5(5)        | C5       | C4       | C3       | C2       | 3.8(5)         |
| S1       | C20      | C15      | C16      | 177.1(3)       | C5       | C14      | C1       | O1       | 166.9(4)       |
| S1       | C20      | C19      | C18      | -177.9(3)      | C5       | C14      | C1       | C2       | -16.1(5)       |
| O1       | C1       | C2       | C3       | -151.1(3)      | C5       | C14      | C13      | C12      | 2.7(6)         |
| O1       | C1       | C2       | C21      | -50.8(5)       | C12      | C7       | C8       | C9       | 3.5(6)         |
| N1       | C4       | C3       | S1       | -51.7(4)       | C12      | C7       | C6       | C5       | 1.8(6)         |
| N1       | C4       | C3       | C22      | 78.7(5)        | C16      | C17      | C18      | C19      | -0.9(6)        |
| N1       | C4       | C3       | C2       | -177.8(4)      | C19      | C20      | C15      | N1       | 173.1(4)       |
| N1       | C4       | C5       | C14      | -164.9(4)      | C19      | C20      | C15      | C16      | -2.3(6)        |
| N1       | C4       | C5       | C6       | 13.2(5)        | C23      | C22      | C21      | C2       | -145.9(4)      |
| N1       | C15      | C16      | C17      | -174.2(4)      | C23      | C28      | C27      | C26      | -2.8(6)        |
| C4       | N1       | C15      | C20      | 24.3(6)        | C23      | C24      | C25      | C26      | -1.0(7)        |
| C4       | N1       | C15      | C16      | -160.3(4)      | C1       | C14      | C5       | C4       | -7.7(5)        |
| C4       | C3       | C22      | C23      | -92.1(4)       | C1       | C14      | C5       | C6       | 174.2(3)       |
| C4       | C3       | C22      | C21      | 141.0(4)       | C1       | C14      | C13      | C12      | -176.1(3)      |
| C4       | C3       | C2       | C1       | -25.7(5)       | C1       | C2       | C21      | C22      | -96.6(3)       |
| C4       | C3       | C2       | C21      | -140.3(3)      | C13      | C14      | C5       | C4       | 173.5(4)       |

**Table S35. Torsion Angles for 2ad.**

| A   | B   | C   | D   | Angle/°   | A   | B   | C   | D   | Angle/°   |
|-----|-----|-----|-----|-----------|-----|-----|-----|-----|-----------|
| C4  | C5  | C6  | C7  | -175.7(3) | C13 | C14 | C5  | C6  | -4.6(5)   |
| C3  | S1  | C20 | C15 | -29.7(4)  | C13 | C14 | C1  | O1  | -14.3(6)  |
| C3  | S1  | C20 | C19 | 149.7(3)  | C13 | C14 | C1  | C2  | 162.7(4)  |
| C3  | C4  | C5  | C14 | 13.7(5)   | C13 | C12 | C7  | C8  | 177.7(4)  |
| C3  | C4  | C5  | C6  | -168.3(3) | C13 | C12 | C7  | C6  | -3.8(5)   |
| C3  | C22 | C23 | C28 | 87.7(5)   | C13 | C12 | C11 | C10 | 179.5(4)  |
| C3  | C22 | C23 | C24 | -91.0(5)  | C2  | C3  | C22 | C23 | 146.1(4)  |
| C3  | C22 | C21 | C2  | -19.1(3)  | C2  | C3  | C22 | C21 | 19.2(3)   |
| C3  | C2  | C21 | C22 | 19.7(3)   | C21 | C22 | C23 | C28 | -162.3(4) |
| C20 | S1  | C3  | C4  | 53.4(3)   | C21 | C22 | C23 | C24 | 19.0(6)   |
| C20 | S1  | C3  | C22 | -79.7(3)  | C10 | C9  | C8  | C7  | -0.9(6)   |
| C20 | S1  | C3  | C2  | -175.3(3) | C7  | C12 | C13 | C14 | 1.6(6)    |
| C20 | C15 | C16 | C17 | 1.5(6)    | C7  | C12 | C11 | C10 | 0.6(6)    |
| C20 | C19 | C18 | C17 | 0.1(6)    | C11 | C12 | C13 | C14 | -177.4(4) |
| C9  | C10 | C11 | C12 | 2.1(6)    | C11 | C12 | C7  | C8  | -3.3(5)   |
| C14 | C5  | C6  | C7  | 2.4(6)    | C11 | C12 | C7  | C6  | 175.2(3)  |
| C14 | C1  | C2  | C3  | 31.8(5)   | C28 | C23 | C24 | C25 | 0.4(6)    |
| C14 | C1  | C2  | C21 | 132.1(3)  | C28 | C27 | C26 | C25 | 2.1(7)    |
| C22 | C3  | C2  | C1  | 95.5(3)   | C8  | C9  | C10 | C11 | -1.9(6)   |
| C22 | C3  | C2  | C21 | -19.1(3)  | C8  | C7  | C6  | C5  | -179.8(4) |
| C22 | C23 | C28 | C27 | -177.1(4) | C6  | C7  | C8  | C9  | -174.9(4) |

**Table S35. Torsion Angles for 2ad.**

| A   | B   | C   | D   | Angle/°   | A   | B   | C   | D   | Angle/° |
|-----|-----|-----|-----|-----------|-----|-----|-----|-----|---------|
| C22 | C23 | C24 | C25 | 179.0(4)  | C24 | C23 | C28 | C27 | 1.6(6)  |
| C15 | N1  | C4  | C3  | 9.9(5)    | C27 | C26 | C25 | C24 | -0.2(7) |
| C15 | N1  | C4  | C5  | -171.7(3) |     |     |     |     |         |

**Table S36. Hydrogen Atom Coordinates ( $\text{\AA} \times 10^4$ ) and Isotropic Displacement Parameters ( $\text{\AA}^2 \times 10^3$ ) for 2ad.**

| Atom | x       | y       | z        | U(eq) |
|------|---------|---------|----------|-------|
| H9   | 6390.83 | 3744.2  | 10275.16 | 34    |
| H22  | 2746.6  | 6585.98 | 5622.7   | 29    |
| H16  | 2268.09 | 5670.96 | 9057.21  | 33    |
| H19  | 850.82  | 2165.15 | 6521.7   | 34    |
| H13  | 5040.93 | 4355.11 | 6003.53  | 31    |
| H2   | 2981.56 | 2203.82 | 4866.38  | 31    |
| H21A | 2746.35 | 5596.46 | 4007.1   | 35    |
| H21B | 2144.59 | 4170.75 | 3956.53  | 35    |
| H10  | 6847.92 | 4346.86 | 8873.87  | 33    |
| H11  | 6173.82 | 4471.66 | 7200.34  | 32    |
| H28  | 2083.1  | 7854.55 | 6695.84  | 36    |
| H8   | 5253.19 | 3418.23 | 9991.59  | 32    |
| H17  | 1160.82 | 5297.63 | 9070.9   | 35    |
| H6   | 4113.77 | 3650.03 | 8795.91  | 31    |



**Table S36. Hydrogen Atom Coordinates ( $\text{\AA} \times 10^4$ ) and Isotropic Displacement Parameters ( $\text{\AA}^2 \times 10^3$ ) for 2ad.**

| Atom | x       | y       | z       | U(eq) |
|------|---------|---------|---------|-------|
| H24  | 1195.06 | 4992.56 | 4134.83 | 35    |
| H27  | 1034.82 | 8823.11 | 6809.6  | 42    |
| H18  | 457.58  | 3515.63 | 7810.02 | 36    |
| H26  | 73.71   | 8030.02 | 5534.49 | 48    |
| H25  | 159.47  | 6094.12 | 4202.21 | 43    |

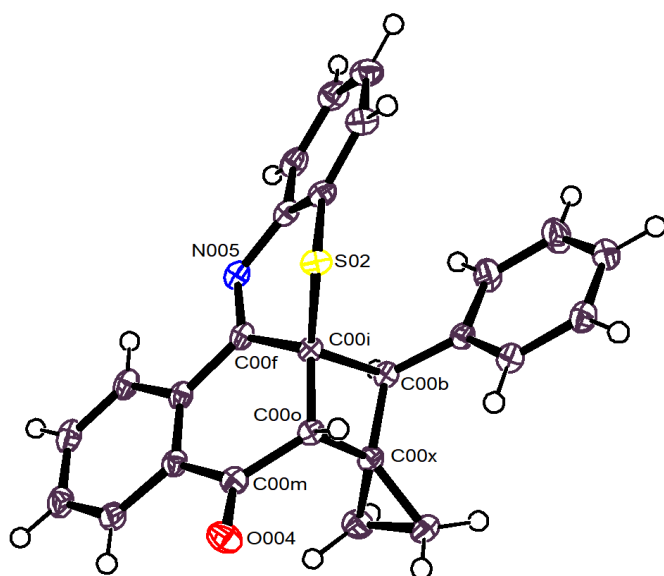

**Table S37. Crystal data and structure refinement for 2af.**

|                     |                                                            |
|---------------------|------------------------------------------------------------|
| Identification code | <b>2af</b>                                                 |
| CCDC Number         | <b>2403403</b>                                             |
| Empirical formula   | $\text{C}_{52}\text{H}_{38}\text{N}_2\text{O}_2\text{S}_2$ |
| Formula weight      | 786.96                                                     |
| Temperature/K       | 100.0                                                      |
| Crystal system      | monoclinic                                                 |
| Space group         | $P2_1/n$                                                   |
| a/ $\text{\AA}$     | 12.2581(6)                                                 |

|                                             |                                                                |
|---------------------------------------------|----------------------------------------------------------------|
| b/Å                                         | 25.0852(11)                                                    |
| c/Å                                         | 12.7705(6)                                                     |
| $\alpha$ /°                                 | 90                                                             |
| $\beta$ /°                                  | 95.524(2)                                                      |
| $\gamma$ /°                                 | 90                                                             |
| Volume/Å <sup>3</sup>                       | 3908.7(3)                                                      |
| Z                                           | 4                                                              |
| $\rho_{\text{calc}}$ /cm <sup>3</sup>       | 1.337                                                          |
| $\mu$ /mm <sup>-1</sup>                     | 0.183                                                          |
| F(000)                                      | 1648.0                                                         |
| Crystal size/mm <sup>3</sup>                | 0.02 × 0.016 × 0.012                                           |
| Radiation                                   | MoK $\alpha$ ( $\lambda$ = 0.71073)                            |
| 2 $\Theta$ range for data collection/°      | 4.4 to 60.066                                                  |
| Index ranges                                | -16 ≤ h ≤ 17, -35 ≤ k ≤ 35, -17 ≤ l ≤ 17                       |
| Reflections collected                       | 93193                                                          |
| Independent reflections                     | 11369 [R <sub>int</sub> = 0.0575, R <sub>sigma</sub> = 0.0319] |
| Data/restraints/parameters                  | 11369/0/523                                                    |
| Goodness-of-fit on F <sup>2</sup>           | 1.022                                                          |
| Final R indexes [I ≥ 2 $\sigma$ (I)]        | R <sub>1</sub> = 0.0389, wR <sub>2</sub> = 0.1032              |
| Final R indexes [all data]                  | R <sub>1</sub> = 0.0447, wR <sub>2</sub> = 0.1088              |
| Largest diff. peak/hole / e Å <sup>-3</sup> | 0.46/-0.29                                                     |

**Table S38. Fractional Atomic Coordinates ( $\times 10^4$ ) and Equivalent Isotropic Displacement Parameters ( $\text{\AA}^2 \times 10^3$ ) for 2af.  $U_{\text{eq}}$  is defined as 1/3 of the trace of the orthogonalised  $U_{\text{II}}$  tensor.**

| Atom | x         | y         | z         | U(eq)     |
|------|-----------|-----------|-----------|-----------|
| S01  | 1934.3(2) | 4242.3(2) | 3667.7(2) | 15.67(6)  |
| S02  | 3445.6(2) | 4137.1(2) | 6725.0(2) | 16.72(6)  |
| O003 | 3709.8(7) | 2732.1(3) | 5314.5(6) | 21.80(16) |

**Table S38. Fractional Atomic Coordinates ( $\times 10^4$ ) and Equivalent Isotropic Displacement Parameters ( $\text{\AA}^2 \times 10^3$ ) for 2af.  $U_{\text{eq}}$  is defined as 1/3 of the trace of the orthogonalised  $U_{\text{ij}}$  tensor.**

| Atom | <i>x</i>  | <i>y</i>  | <i>z</i>  | $U_{\text{eq}}$ |
|------|-----------|-----------|-----------|-----------------|
| O004 | 5648.9(7) | 2767.4(3) | 8338.6(7) | 24.13(17)       |
| N005 | 3313.9(7) | 4567.1(4) | 8950.3(7) | 17.52(17)       |
| N006 | 4244.8(7) | 4615.6(4) | 3298.1(7) | 17.08(17)       |
| C007 | 2574.3(9) | 4783.2(4) | 8157.6(8) | 17.09(19)       |
| C008 | 4878.7(9) | 3446.9(4) | 4958.7(8) | 17.19(19)       |
| C009 | 3375.9(8) | 4873.7(4) | 2717.9(8) | 15.99(18)       |
| C00A | 3074.0(8) | 3829.4(4) | 3388.6(8) | 14.17(17)       |
| C00B | 2255.3(8) | 3456.5(4) | 8085.7(8) | 15.37(18)       |
| C00C | 4101.8(8) | 4149.3(4) | 3684.3(8) | 15.22(18)       |
| C00D | 1402.3(8) | 3439.6(4) | 7158.7(8) | 16.11(18)       |
| C00E | 1763.9(9) | 4002.1(4) | 836.5(8)  | 17.85(19)       |
| C00F | 3753.8(8) | 4108.8(4) | 8820.7(8) | 15.38(18)       |
| C00G | 4985.4(8) | 3933.4(4) | 4432.7(8) | 17.06(19)       |
| C00H | 3869.5(9) | 3121.4(4) | 4773.6(8) | 16.72(19)       |
| C00I | 3376.8(8) | 3750.3(4) | 7905.0(8) | 14.24(17)       |
| C00J | 2603.0(9) | 4657.6(4) | 7085.9(8) | 17.51(19)       |
| C00K | 3054.9(8) | 3580.1(4) | 2238.2(8) | 15.27(18)       |
| C00L | 2270.3(8) | 4778.6(4) | 2874.9(8) | 15.42(18)       |
| C00M | 5030.9(8) | 3127.0(4) | 8537.9(8) | 16.86(19)       |
| C00N | 1962.7(8) | 3602.7(4) | 1592.6(8) | 15.89(18)       |
| C00O | 3961.4(8) | 3204.0(4) | 7885.0(8) | 15.03(18)       |
| C00P | 1119.4(9) | 3245.9(4) | 1753.7(9) | 19.2(2)         |
| C00Q | 1459.0(9) | 3089.9(4) | 6317.2(8) | 18.10(19)       |
| C00R | 1453.9(9) | 5109.1(4) | 2401.6(9) | 18.9(2)         |
| C00S | 1869.0(9) | 5189.9(4) | 8433.3(9) | 20.7(2)         |

**Table S38. Fractional Atomic Coordinates ( $\times 10^4$ ) and Equivalent Isotropic Displacement Parameters ( $\text{\AA}^2 \times 10^3$ ) for 2af.  $U_{\text{eq}}$  is defined as 1/3 of the trace of the orthogonalised  $U_{\text{ij}}$  tensor.**

| Atom | <i>x</i>   | <i>y</i>  | <i>z</i>   | $U_{\text{eq}}$ |
|------|------------|-----------|------------|-----------------|
| C00T | 4648.8(8)  | 3934.9(4) | 9611.8(8)  | 16.39(18)       |
| C00U | 3367.7(9)  | 3052.0(4) | 2792.7(8)  | 16.44(19)       |
| C00V | 5268.6(8)  | 3474.4(4) | 9471.7(8)  | 17.00(19)       |
| C00W | 3628.3(9)  | 5284.2(4) | 2038.6(9)  | 19.9(2)         |
| C00X | 2954.0(8)  | 2958.6(4) | 8341.3(8)  | 16.52(18)       |
| C00Y | 3064.4(8)  | 3261.6(4) | 3859.2(8)  | 15.46(18)       |
| C00Z | 666.1(9)   | 3102.8(4) | 5459.5(9)  | 20.6(2)         |
| C010 | 6144.3(9)  | 3339.2(5) | 10210.2(9) | 21.4(2)         |
| C011 | 1722.7(10) | 5514.6(5) | 1735.6(9)  | 23.4(2)         |
| C012 | 5719.9(9)  | 3271.3(5) | 5698.6(9)  | 21.7(2)         |
| C013 | 4915.0(9)  | 4251.2(4) | 10506.3(9) | 19.9(2)         |
| C014 | 1974.6(10) | 4948.8(4) | 6317.6(9)  | 21.9(2)         |
| C015 | 747.2(10)  | 4044.2(5) | 254.4(9)   | 21.5(2)         |
| C016 | 5931.3(10) | 4238.8(5) | 4669.3(10) | 23.7(2)         |
| C017 | 2971.5(10) | 2662.6(5) | 9366.7(9)  | 23.7(2)         |
| C018 | 5762.6(10) | 4106.4(5) | 11246.3(9) | 23.7(2)         |
| C019 | 532.2(10)  | 3798.6(5) | 7121.0(10) | 25.1(2)         |
| C01A | 108.4(9)   | 3283.4(4) | 1164.4(9)  | 22.0(2)         |
| C01B | 2809.4(10) | 5595.8(5) | 1535.7(9)  | 23.4(2)         |
| C01C | 1290.5(10) | 5352.2(5) | 6609.2(10) | 24.2(2)         |
| C01D | 1224.8(10) | 5467.7(4) | 7670.0(10) | 23.9(2)         |
| C01E | 6384.3(10) | 3651.7(5) | 11098.7(9) | 24.8(2)         |
| C01F | 2627.8(10) | 2384.5(5) | 8335.5(10) | 24.3(2)         |
| C01G | 4371.5(10) | 2726.9(5) | 2635.7(9)  | 23.4(2)         |
| C01H | 3242.7(10) | 2494.1(4) | 2387.7(9)  | 23.7(2)         |

**Table S38. Fractional Atomic Coordinates ( $\times 10^4$ ) and Equivalent Isotropic Displacement Parameters ( $\text{\AA}^2 \times 10^3$ ) for 2af.  $U_{\text{eq}}$  is defined as 1/3 of the trace of the orthogonalised  $U_{\text{ij}}$  tensor.**

| Atom | <i>x</i>   | <i>y</i>  | <i>z</i>   | $U_{\text{eq}}$ |
|------|------------|-----------|------------|-----------------|
| C01I | 6652.5(10) | 3578.3(5) | 5919.0(10) | 27.1(2)         |
| C01J | -196.6(10) | 3463.0(5) | 5433.0(10) | 25.2(2)         |
| C01K | -78.9(10)  | 3681.2(5) | 411.0(9)   | 23.1(2)         |
| C01L | 6754.2(10) | 4062.3(5) | 5404.1(11) | 28.9(3)         |
| C01M | -256.1(11) | 3810.7(5) | 6268.5(12) | 31.6(3)         |

**Table S39. Anisotropic Displacement Parameters ( $\text{\AA}^2 \times 10^3$ ) for 2af. The Anisotropic displacement factor exponent takes the form:  $-2\pi^2[h^2a^{*2}U_{11}+2hka^*b^*U_{12}+\dots]$ .**

| Atom | $U_{11}$  | $U_{22}$  | $U_{33}$  | $U_{23}$ | $U_{13}$ | $U_{12}$ |
|------|-----------|-----------|-----------|----------|----------|----------|
| S01  | 15.81(12) | 15.93(12) | 16.03(12) | 1.26(8)  | 5.51(9)  | 1.18(8)  |
| S02  | 20.51(13) | 15.86(12) | 14.67(12) | 0.26(8)  | 6.18(9)  | 1.82(8)  |
| O003 | 25.8(4)   | 19.9(4)   | 20.4(4)   | 6.5(3)   | 5.8(3)   | 2.7(3)   |
| O004 | 23.4(4)   | 25.9(4)   | 23.1(4)   | -1.4(3)  | 2.6(3)   | 8.1(3)   |
| N005 | 18.2(4)   | 17.0(4)   | 18.1(4)   | -2.6(3)  | 5.3(3)   | -2.3(3)  |
| N006 | 15.9(4)   | 16.4(4)   | 18.9(4)   | 1.4(3)   | 1.8(3)   | 0.2(3)   |
| C007 | 17.9(5)   | 14.1(4)   | 19.9(5)   | -2.3(4)  | 5.2(4)   | -2.3(3)  |
| C008 | 18.8(5)   | 17.8(5)   | 15.3(4)   | 0.2(4)   | 3.6(3)   | 3.3(4)   |
| C009 | 17.0(4)   | 13.9(4)   | 17.0(4)   | -0.1(3)  | 1.5(3)   | -0.4(3)  |
| C00A | 14.8(4)   | 13.9(4)   | 14.4(4)   | 0.4(3)   | 4.3(3)   | 0.6(3)   |
| C00B | 15.4(4)   | 15.7(4)   | 15.4(4)   | -1.5(3)  | 3.8(3)   | -0.4(3)  |
| C00C | 14.5(4)   | 16.0(4)   | 15.4(4)   | -0.5(3)  | 3.3(3)   | 0.8(3)   |
| C00D | 14.9(4)   | 15.7(4)   | 18.0(4)   | -1.2(4)  | 3.3(3)   | -1.2(3)  |
| C00E | 22.6(5)   | 17.6(5)   | 13.9(4)   | 0.2(4)   | 4.6(4)   | -2.0(4)  |
| C00F | 16.3(4)   | 16.5(4)   | 14.1(4)   | -1.8(3)  | 5.1(3)   | -3.5(3)  |
| C00G | 16.5(4)   | 17.7(5)   | 17.1(4)   | 0.6(4)   | 2.1(3)   | 2.7(4)   |
| C00H | 19.4(5)   | 16.6(4)   | 14.9(4)   | 0.8(4)   | 5.5(3)   | 3.4(4)   |

**Table S39. Anisotropic Displacement Parameters ( $\text{\AA}^2 \times 10^3$ ) for 2af. The Anisotropic displacement factor exponent takes the form:  $-2\pi^2[h^2a^{*2}U_{11}+2hka^*b^*U_{12}+\dots]$ .**

| Atom | U <sub>11</sub> | U <sub>22</sub> | U <sub>33</sub> | U <sub>23</sub> | U <sub>13</sub> | U <sub>12</sub> |
|------|-----------------|-----------------|-----------------|-----------------|-----------------|-----------------|
| C00I | 15.3(4)         | 14.5(4)         | 13.2(4)         | -1.0(3)         | 3.3(3)          | -0.5(3)         |
| C00J | 19.2(5)         | 14.4(4)         | 19.7(5)         | -0.8(4)         | 6.1(4)          | -0.6(3)         |
| C00K | 17.6(4)         | 15.4(4)         | 13.5(4)         | 0.3(3)          | 5.0(3)          | -1.1(3)         |
| C00L | 17.5(4)         | 14.1(4)         | 14.9(4)         | -0.3(3)         | 2.8(3)          | 0.1(3)          |
| C00M | 17.2(4)         | 18.5(5)         | 15.3(4)         | 1.6(4)          | 4.1(3)          | -0.8(4)         |
| C00N | 19.2(5)         | 15.3(4)         | 13.5(4)         | -1.4(3)         | 3.6(3)          | -1.1(3)         |
| C00O | 16.2(4)         | 14.6(4)         | 14.7(4)         | -1.2(3)         | 3.7(3)          | 0.6(3)          |
| C00P | 22.6(5)         | 16.1(4)         | 19.2(5)         | 1.3(4)          | 2.9(4)          | -3.1(4)         |
| C00Q | 17.1(4)         | 18.4(5)         | 19.1(5)         | -2.5(4)         | 3.8(4)          | -0.5(4)         |
| C00R | 16.5(4)         | 18.8(5)         | 21.5(5)         | 1.6(4)          | 2.8(4)          | 1.4(4)          |
| C00S | 20.8(5)         | 16.9(5)         | 25.3(5)         | -5.0(4)         | 7.1(4)          | -1.4(4)         |
| C00T | 16.7(4)         | 18.6(5)         | 14.3(4)         | 0.0(4)          | 4.0(3)          | -4.4(4)         |
| C00U | 19.2(5)         | 15.1(4)         | 15.6(4)         | 0.3(3)          | 4.5(3)          | 0.7(3)          |
| C00V | 17.1(4)         | 18.3(5)         | 15.8(4)         | 1.7(4)          | 2.9(3)          | -3.6(3)         |
| C00W | 19.0(5)         | 18.5(5)         | 22.3(5)         | 3.4(4)          | 3.0(4)          | -2.5(4)         |
| C00X | 16.8(4)         | 15.7(4)         | 17.3(4)         | 0.4(4)          | 3.1(3)          | -1.2(3)         |
| C00Y | 17.6(4)         | 14.3(4)         | 15.1(4)         | 1.9(3)          | 4.6(3)          | 0.2(3)          |
| C00Z | 22.3(5)         | 20.8(5)         | 18.7(5)         | -2.8(4)         | 2.3(4)          | -4.0(4)         |
| C010 | 21.2(5)         | 20.6(5)         | 21.9(5)         | 4.6(4)          | -0.5(4)         | -4.0(4)         |
| C011 | 21.9(5)         | 21.6(5)         | 26.2(5)         | 6.8(4)          | -0.7(4)         | 2.3(4)          |
| C012 | 24.1(5)         | 20.7(5)         | 20.0(5)         | 2.4(4)          | 0.2(4)          | 5.3(4)          |
| C013 | 21.9(5)         | 21.5(5)         | 16.8(5)         | -2.1(4)         | 5.2(4)          | -6.7(4)         |
| C014 | 25.8(5)         | 19.1(5)         | 21.2(5)         | 1.8(4)          | 5.3(4)          | 2.0(4)          |
| C015 | 26.4(5)         | 21.3(5)         | 16.4(5)         | 1.1(4)          | 0.6(4)          | 1.2(4)          |
| C016 | 20.6(5)         | 20.2(5)         | 29.3(6)         | 3.1(4)          | -3.2(4)         | -0.1(4)         |
| C017 | 23.0(5)         | 25.6(5)         | 22.8(5)         | 7.4(4)          | 4.1(4)          | -1.5(4)         |

**Table S39. Anisotropic Displacement Parameters ( $\text{\AA}^2 \times 10^3$ ) for 2af. The Anisotropic displacement factor exponent takes the form:  $-2\pi^2[h^2a^*^2U_{11}+2hka^*b^*U_{12}+\dots]$ .**

| Atom | U <sub>11</sub> | U <sub>22</sub> | U <sub>33</sub> | U <sub>23</sub> | U <sub>13</sub> | U <sub>12</sub> |
|------|-----------------|-----------------|-----------------|-----------------|-----------------|-----------------|
| C018 | 26.2(6)         | 28.2(6)         | 16.4(5)         | -0.8(4)         | 1.5(4)          | -11.8(4)        |
| C019 | 21.7(5)         | 23.7(5)         | 29.1(6)         | -10.1(4)        | -1.8(4)         | 4.6(4)          |
| C01A | 22.1(5)         | 19.0(5)         | 24.7(5)         | -1.7(4)         | 1.5(4)          | -4.1(4)         |
| C01B | 24.1(5)         | 20.7(5)         | 25.2(5)         | 8.2(4)          | 1.9(4)          | -1.2(4)         |
| C01C | 24.9(5)         | 19.1(5)         | 29.1(6)         | 3.1(4)          | 4.6(4)          | 3.5(4)          |
| C01D | 22.0(5)         | 17.5(5)         | 33.2(6)         | -3.1(4)         | 7.4(4)          | 2.0(4)          |
| C01E | 25.5(5)         | 27.7(6)         | 20.0(5)         | 5.4(4)          | -4.2(4)         | -9.1(4)         |
| C01F | 23.9(5)         | 16.6(5)         | 32.1(6)         | 2.3(4)          | 0.9(4)          | -3.7(4)         |
| C01G | 25.5(5)         | 22.5(5)         | 22.9(5)         | -1.3(4)         | 6.6(4)          | 6.1(4)          |
| C01H | 32.0(6)         | 15.7(5)         | 23.3(5)         | -2.5(4)         | 2.5(4)          | 1.0(4)          |
| C01I | 25.4(6)         | 26.0(6)         | 28.2(6)         | 1.6(5)          | -6.3(4)         | 5.4(4)          |
| C01J | 24.5(5)         | 22.5(5)         | 27.0(6)         | -1.4(4)         | -5.9(4)         | -0.3(4)         |
| C01K | 24.1(5)         | 24.4(5)         | 20.0(5)         | -2.5(4)         | -1.7(4)         | -0.8(4)         |
| C01L | 22.5(5)         | 25.5(6)         | 36.4(7)         | 1.8(5)          | -8.4(5)         | -0.5(4)         |
| C01M | 25.1(6)         | 26.6(6)         | 40.6(7)         | -10.4(5)        | -9.6(5)         | 9.0(5)          |

**Table S40. Bond Lengths for 2af.**

| Atom | Atom | Length/ $\text{\AA}$ | Atom | Atom | Length/ $\text{\AA}$ |
|------|------|----------------------|------|------|----------------------|
| S01  | C00A | 1.8022(10)           | C00K | C00U | 1.5333(14)           |
| S01  | C00L | 1.7563(10)           | C00L | C00R | 1.3919(14)           |
| S02  | C00I | 1.8012(10)           | C00M | C00O | 1.4969(14)           |
| S02  | C00J | 1.7539(11)           | C00M | C00V | 1.4831(15)           |
| O003 | C00H | 1.2227(13)           | C00N | C00P | 1.3975(14)           |
| O004 | C00M | 1.2205(13)           | C00O | C00X | 1.5435(14)           |
| N005 | C007 | 1.4014(14)           | C00P | C01A | 1.3898(15)           |
| N005 | C00F | 1.2872(13)           | C00Q | C00Z | 1.3930(15)           |

**Table S40. Bond Lengths for 2af.**

| Atom | Atom | Length/Å   | Atom | Atom | Length/Å   |
|------|------|------------|------|------|------------|
| N006 | C009 | 1.3967(13) | C00R | C011 | 1.3858(15) |
| N006 | C00C | 1.2879(13) | C00S | C01D | 1.3825(17) |
| C007 | C00J | 1.4081(15) | C00T | C00V | 1.4036(15) |
| C007 | C00S | 1.4037(14) | C00T | C013 | 1.4031(14) |
| C008 | C00G | 1.4053(14) | C00U | C00Y | 1.5386(14) |
| C008 | C00H | 1.4822(15) | C00U | C01G | 1.5055(15) |
| C008 | C012 | 1.4009(15) | C00U | C01H | 1.4947(15) |
| C009 | C00L | 1.4094(14) | C00V | C010 | 1.4007(15) |
| C009 | C00W | 1.4002(14) | C00W | C01B | 1.3809(15) |
| C00A | C00C | 1.5107(14) | C00X | C017 | 1.5037(15) |
| C00A | C00K | 1.5948(14) | C00X | C01F | 1.4945(15) |
| C00A | C00Y | 1.5463(14) | C00Z | C01J | 1.3888(16) |
| C00B | C00D | 1.5028(14) | C010 | C01E | 1.3872(16) |
| C00B | C00I | 1.5960(14) | C011 | C01B | 1.3953(17) |
| C00B | C00X | 1.5318(14) | C012 | C01I | 1.3847(17) |
| C00C | C00G | 1.4766(14) | C013 | C018 | 1.3840(16) |
| C00D | C00Q | 1.3941(14) | C014 | C01C | 1.3878(16) |
| C00D | C019 | 1.3932(15) | C015 | C01K | 1.3905(16) |
| C00E | C00N | 1.3966(14) | C016 | C01L | 1.3827(16) |
| C00E | C015 | 1.3922(15) | C017 | C01F | 1.5138(17) |
| C00F | C00I | 1.5120(14) | C018 | C01E | 1.3946(18) |
| C00F | C00T | 1.4836(14) | C019 | C01M | 1.3846(17) |
| C00G | C016 | 1.3984(15) | C01A | C01K | 1.3898(16) |
| C00H | C00Y | 1.4965(14) | C01C | C01D | 1.3951(17) |
| C00I | C00O | 1.5477(14) | C01G | C01H | 1.5072(17) |
| C00J | C014 | 1.3943(15) | C01I | C01L | 1.3922(18) |



**Table S40. Bond Lengths for 2af.**

| Atom | Atom | Length/Å   | Atom | Atom | Length/Å   |
|------|------|------------|------|------|------------|
| C00K | C00N | 1.5043(14) | C01J | C01M | 1.3855(18) |

**Table S41. Bond Angles for 2af.**

| Atom | Atom | Atom | Angle/°    | Atom | Atom | Atom | Angle/°    |
|------|------|------|------------|------|------|------|------------|
| C00L | S01  | C00A | 95.56(5)   | C00E | C00N | C00K | 119.53(9)  |
| C00J | S02  | C00I | 96.03(5)   | C00E | C00N | C00P | 118.62(10) |
| C00F | N005 | C007 | 120.17(9)  | C00P | C00N | C00K | 121.81(9)  |
| C00C | N006 | C009 | 119.95(9)  | C00M | C00O | C00I | 119.15(8)  |
| N005 | C007 | C00J | 122.72(9)  | C00M | C00O | C00X | 115.33(8)  |
| N005 | C007 | C00S | 118.11(10) | C00X | C00O | C00I | 87.61(7)   |
| C00S | C007 | C00J | 118.68(10) | C01A | C00P | C00N | 120.70(10) |
| C00G | C008 | C00H | 121.12(9)  | C00Z | C00Q | C00D | 120.57(10) |
| C012 | C008 | C00G | 119.95(10) | C011 | C00R | C00L | 120.02(10) |
| C012 | C008 | C00H | 118.89(10) | C01D | C00S | C007 | 120.88(11) |
| N006 | C009 | C00L | 122.73(9)  | C00V | C00T | C00F | 121.94(9)  |
| N006 | C009 | C00W | 117.84(9)  | C013 | C00T | C00F | 119.14(10) |
| C00W | C009 | C00L | 119.05(9)  | C013 | C00T | C00V | 118.87(10) |
| C00C | C00A | S01  | 106.80(7)  | C00K | C00U | C00Y | 92.43(8)   |
| C00C | C00A | C00K | 112.12(8)  | C01G | C00U | C00K | 125.29(9)  |
| C00C | C00A | C00Y | 115.43(8)  | C01G | C00U | C00Y | 124.98(9)  |
| C00K | C00A | S01  | 117.69(7)  | C01H | C00U | C00K | 129.52(9)  |
| C00Y | C00A | S01  | 114.67(7)  | C01H | C00U | C00Y | 126.93(9)  |
| C00Y | C00A | C00K | 89.82(7)   | C01H | C00U | C01G | 60.31(8)   |
| C00D | C00B | C00I | 116.29(8)  | C00T | C00V | C00M | 121.29(9)  |
| C00D | C00B | C00X | 118.50(9)  | C010 | C00V | C00M | 118.53(10) |
| C00X | C00B | C00I | 86.31(7)   | C010 | C00V | C00T | 120.17(10) |

**Table S41. Bond Angles for 2af.**

| Atom | Atom | Atom | Angle/°    | Atom | Atom | Atom | Angle/°    |
|------|------|------|------------|------|------|------|------------|
| N006 | C00C | C00A | 121.84(9)  | C01B | C00W | C009 | 120.68(10) |
| N006 | C00C | C00G | 117.56(9)  | C00B | C00X | C00O | 92.61(8)   |
| C00G | C00C | C00A | 120.60(9)  | C017 | C00X | C00B | 123.30(9)  |
| C00Q | C00D | C00B | 122.85(9)  | C017 | C00X | C00O | 125.51(9)  |
| C019 | C00D | C00B | 118.77(9)  | C01F | C00X | C00B | 129.87(9)  |
| C019 | C00D | C00Q | 118.35(10) | C01F | C00X | C00O | 127.29(9)  |
| C015 | C00E | C00N | 120.74(10) | C01F | C00X | C017 | 60.65(8)   |
| N005 | C00F | C00I | 122.01(9)  | C00H | C00Y | C00A | 119.39(9)  |
| N005 | C00F | C00T | 117.81(9)  | C00H | C00Y | C00U | 114.39(8)  |
| C00T | C00F | C00I | 120.18(9)  | C00U | C00Y | C00A | 87.67(7)   |
| C008 | C00G | C00C | 122.12(9)  | C01J | C00Z | C00Q | 120.42(10) |
| C016 | C00G | C008 | 119.07(10) | C01E | C010 | C00V | 120.16(11) |
| C016 | C00G | C00C | 118.70(9)  | C00R | C011 | C01B | 120.47(10) |
| O003 | C00H | C008 | 121.76(10) | C01I | C012 | C008 | 120.12(11) |
| O003 | C00H | C00Y | 119.95(10) | C018 | C013 | C00T | 120.53(11) |
| C008 | C00H | C00Y | 118.20(9)  | C01C | C014 | C00J | 120.02(11) |
| C00B | C00I | S02  | 118.69(7)  | C01K | C015 | C00E | 120.03(10) |
| C00F | C00I | S02  | 106.93(7)  | C01L | C016 | C00G | 120.45(11) |
| C00F | C00I | C00B | 111.48(8)  | C00X | C017 | C01F | 59.38(7)   |
| C00F | C00I | C00O | 115.59(8)  | C013 | C018 | C01E | 120.43(11) |
| C00O | C00I | S02  | 113.84(7)  | C01M | C019 | C00D | 121.02(11) |
| C00O | C00I | C00B | 90.02(7)   | C00P | C01A | C01K | 120.19(10) |
| C007 | C00J | S02  | 119.50(8)  | C00W | C01B | C011 | 119.76(10) |
| C014 | C00J | S02  | 120.30(8)  | C014 | C01C | C01D | 120.31(11) |
| C014 | C00J | C007 | 120.20(10) | C00S | C01D | C01C | 119.84(10) |
| C00N | C00K | C00A | 115.05(8)  | C010 | C01E | C018 | 119.81(11) |

**Table S41. Bond Angles for 2af.**

| Atom | Atom | Atom | Angle/°    | Atom | Atom | Atom | Angle/°    |
|------|------|------|------------|------|------|------|------------|
| C00N | C00K | C00U | 117.10(9)  | C00X | C01F | C017 | 59.98(7)   |
| C00U | C00K | C00A | 86.13(7)   | C00U | C01G | C01H | 59.49(7)   |
| C009 | C00L | S01  | 119.59(8)  | C00U | C01H | C01G | 60.20(7)   |
| C00R | C00L | S01  | 120.52(8)  | C012 | C01I | C01L | 119.92(11) |
| C00R | C00L | C009 | 119.89(9)  | C01M | C01J | C00Z | 119.15(11) |
| O004 | C00M | C00O | 120.47(10) | C01A | C01K | C015 | 119.71(11) |
| O004 | C00M | C00V | 121.61(10) | C016 | C01L | C01I | 120.48(11) |
| C00V | C00M | C00O | 117.76(9)  | C019 | C01M | C01J | 120.48(11) |

**Table S42. Hydrogen Atom Coordinates ( $\text{\AA}\times 10^4$ ) and Isotropic Displacement Parameters ( $\text{\AA}^2\times 10^3$ ) for 2af.**

| Atom | x       | y       | z        | U(eq) |
|------|---------|---------|----------|-------|
| H00B | 1941.75 | 3595.73 | 8726.6   | 18    |
| H00E | 2328.64 | 4247.91 | 718      | 21    |
| H00K | 3659.76 | 3722.49 | 1845.83  | 18    |
| H00O | 4010.56 | 3081.74 | 7145.66  | 18    |
| H00P | 1238.51 | 2974.76 | 2271.52  | 23    |
| H00Q | 2043.56 | 2840.69 | 6328.7   | 22    |
| H00R | 712.4   | 5056.71 | 2535.24  | 23    |
| H00S | 1833.84 | 5275.26 | 9153.98  | 25    |
| H00W | 4370.68 | 5349.14 | 1922.54  | 24    |
| H00Y | 2304.84 | 3151.69 | 3988.87  | 19    |
| H00Z | 715.69  | 2863.76 | 4889.15  | 25    |
| H010 | 6574.9  | 3032.72 | 10102.43 | 26    |
| H011 | 1163.01 | 5738.81 | 1412.89  | 28    |
| H012 | 5650.41 | 2940.89 | 6049.74  | 26    |
| H013 | 4510.25 | 4567.19 | 10604.72 | 24    |

**Table S42. Hydrogen Atom Coordinates ( $\text{\AA}\times 10^4$ ) and Isotropic Displacement Parameters ( $\text{\AA}^2\times 10^3$ ) for 2af.**

| <b>Atom</b> | <b>x</b> | <b>y</b> | <b>z</b> | <b>U(eq)</b> |
|-------------|----------|----------|----------|--------------|
| H014        | 2014.85  | 4871.09  | 5594.3   | 26           |
| H015        | 617.9    | 4320.94  | -250.05  | 26           |
| H016        | 6009.08  | 4569.87  | 4322.87  | 28           |
| H01G        | 2394.88  | 2747.08  | 9832.97  | 28           |
| H01H        | 3694.25  | 2570.09  | 9735.29  | 28           |
| H018        | 5921.88  | 4318.07  | 11858.73 | 28           |
| H019        | 478.81   | 4038.76  | 7688.96  | 30           |
| H01A        | -456.2   | 3036.5   | 1276.89  | 26           |
| H01B        | 2985.3   | 5864.42  | 1055.26  | 28           |
| H01J        | 864.81   | 5550.64  | 6084.02  | 29           |
| H01M        | 738.67   | 5736.56  | 7867.25  | 29           |
| H01N        | 6970.5   | 3556.27  | 11605.24 | 30           |
| H01O        | 3140.38  | 2121.37  | 8076.03  | 29           |
| H01P        | 1841.53  | 2298.3   | 8173.68  | 29           |
| H01C        | 4818.21  | 2595.04  | 3269.99  | 28           |
| H01D        | 4792.48  | 2821.1   | 2038.22  | 28           |
| H01E        | 2973.44  | 2444.57  | 1638.07  | 28           |
| H01F        | 2999.16  | 2218.61  | 2869.25  | 28           |
| H01I        | 7222.26  | 3458.77  | 6421.03  | 33           |
| H01Q        | -739     | 3470.85  | 4849.38  | 30           |
| H01K        | -768.29  | 3704.96  | 4.72     | 28           |
| H01L        | 7393.58  | 4272.91  | 5558.69  | 35           |
| H01R        | -841.89  | 4059.27  | 6256.39  | 38           |

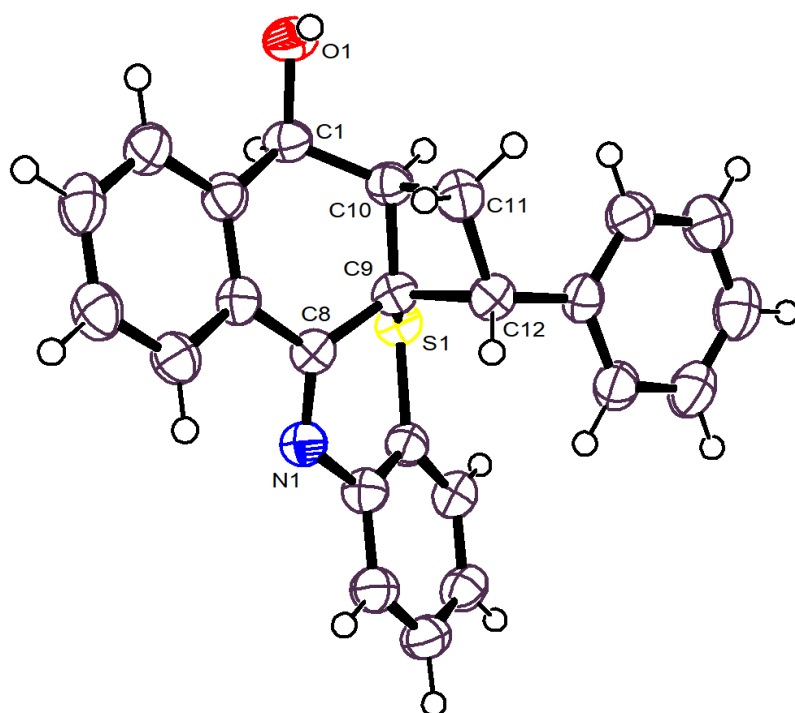

**Table S43. Crystal data and structure refinement for 2ak.**

|                       |                                        |
|-----------------------|----------------------------------------|
| Identification code   | <b>2ak</b>                             |
| CCDC Number           | <b>2332713</b>                         |
| Empirical formula     | <b>C<sub>24</sub>H<sub>19</sub>NOS</b> |
| Formula weight        | 369.46                                 |
| Temperature/K         | 140(2)                                 |
| Crystal system        | trigonal                               |
| Space group           | R-3                                    |
| a/Å                   | 32.1279(14)                            |
| b/Å                   | 32.1279(14)                            |
| c/Å                   | 9.3505(5)                              |
| $\alpha$ /°           | 90                                     |
| $\beta$ /°            | 90                                     |
| $\gamma$ /°           | 120                                    |
| Volume/Å <sup>3</sup> | 8358.5(9)                              |
| Z                     | 18                                     |

|                                                |                                                               |
|------------------------------------------------|---------------------------------------------------------------|
| $\rho_{\text{calc}}/\text{cm}^3$               | 1.321                                                         |
| $\mu/\text{mm}^{-1}$                           | 1.640                                                         |
| F(000)                                         | 3492.0                                                        |
| Crystal size/ $\text{mm}^3$                    | $0.051 \times 0.042 \times 0.034$                             |
| Radiation                                      | CuK $\alpha$ ( $\lambda = 1.54178$ )                          |
| 2 $\Theta$ range for data collection/ $^\circ$ | 9.536 to 149.55                                               |
| Index ranges                                   | $-40 \leq h \leq 39, -40 \leq k \leq 37, -11 \leq l \leq 11$  |
| Reflections collected                          | 27501                                                         |
| Independent reflections                        | 3782 [ $R_{\text{int}} = 0.1192, R_{\text{sigma}} = 0.0710$ ] |
| Data/restraints/parameters                     | 3782/0/246                                                    |
| Goodness-of-fit on $F^2$                       | 1.146                                                         |
| Final R indexes [ $I \geq 2\sigma(I)$ ]        | $R_1 = 0.0713, wR_2 = 0.2071$                                 |
| Final R indexes [all data]                     | $R_1 = 0.0895, wR_2 = 0.2249$                                 |
| Largest diff. peak/hole / $e \text{ \AA}^{-3}$ | 0.41/-0.57                                                    |

**Table S44. Fractional Atomic Coordinates ( $\times 10^4$ ) and Equivalent Isotropic Displacement Parameters ( $\text{\AA}^2 \times 10^3$ ) for 2ak.  $U_{\text{eq}}$  is defined as 1/3 of the trace of the orthogonalised  $U_{\text{ij}}$  tensor.**

| Atom | x          | y          | z         | U(eq)   |
|------|------------|------------|-----------|---------|
| S1   | 1857.2(2)  | 4143.5(2)  | 4697.9(7) | 34.9(3) |
| O1   | 2768.1(7)  | 5842.4(7)  | 5998(2)   | 53.5(6) |
| N1   | 1223.9(8)  | 4425.0(7)  | 2983(2)   | 34.8(5) |
| C1   | 2442.2(9)  | 5458.3(9)  | 5121(3)   | 36.8(6) |
| C2   | 2171.8(9)  | 5604.9(9)  | 4113(3)   | 36.2(6) |
| C3   | 2353.1(10) | 6083.6(9)  | 3727(3)   | 42.2(7) |
| C4   | 2109.3(11) | 6211.8(10) | 2763(3)   | 45.2(7) |
| C5   | 1676.7(10) | 5865.6(10) | 2192(3)   | 43.4(7) |
| C6   | 1490.9(10) | 5388.6(9)  | 2553(3)   | 39.3(6) |
| C7   | 1736.2(9)  | 5251.6(9)  | 3515(3)   | 33.2(6) |

**Table S44. Fractional Atomic Coordinates ( $\times 10^4$ ) and Equivalent Isotropic Displacement Parameters ( $\text{\AA}^2 \times 10^3$ ) for 2ak.  $U_{\text{eq}}$  is defined as 1/3 of the trace of the orthogonalised  $U_{\text{IJ}}$  tensor.**

| Atom | $x$        | $y$        | $z$     | $U(\text{eq})$ |
|------|------------|------------|---------|----------------|
| C8   | 1537.8(9)  | 4734.1(8)  | 3841(3) | 31.8(6)        |
| C9   | 1703.9(9)  | 4594.6(9)  | 5182(3) | 32.6(6)        |
| C10  | 2100.2(9)  | 5024.1(9)  | 6013(3) | 34.5(6)        |
| C11  | 1704.2(10) | 5030.7(9)  | 6934(3) | 38.7(6)        |
| C12  | 1349.9(9)  | 4503.4(8)  | 6482(3) | 34.6(6)        |
| C13  | 1287.6(9)  | 4105.8(9)  | 7485(3) | 36.3(6)        |
| C14  | 1568.5(10) | 4184.8(11) | 8690(3) | 47.0(7)        |
| C15  | 1500.6(12) | 3802.5(11) | 9548(3) | 57.7(9)        |
| C16  | 1152.9(12) | 3337.2(11) | 9219(4) | 58.2(9)        |
| C17  | 871.2(11)  | 3255.0(11) | 8022(3) | 51.9(8)        |
| C18  | 935.9(10)  | 3636.6(9)  | 7167(3) | 41.6(7)        |
| C19  | 1309.7(9)  | 3747.1(9)  | 3865(3) | 34.2(6)        |
| C20  | 1045.0(9)  | 3930.3(9)  | 3183(3) | 35.4(6)        |
| C21  | 603.3(9)   | 3613.5(10) | 2565(3) | 41.1(7)        |
| C22  | 422.6(10)  | 3121.6(10) | 2635(3) | 43.8(7)        |
| C23  | 688.8(10)  | 2942.8(9)  | 3289(3) | 42.6(7)        |
| C24  | 1128.9(9)  | 3251.9(9)  | 3903(3) | 38.4(6)        |

**Table S45. Anisotropic Displacement Parameters ( $\text{\AA}^2 \times 10^3$ ) for 2ak. The Anisotropic displacement factor exponent takes the form:  $-2\pi^2[h^2a^*^2U_{11}+2hka^*b^*U_{12}+\dots]$ .**

| Atom | $U_{11}$ | $U_{22}$ | $U_{33}$ | $U_{23}$ | $U_{13}$  | $U_{12}$ |
|------|----------|----------|----------|----------|-----------|----------|
| S1   | 33.0(4)  | 32.4(4)  | 42.5(5)  | -1.2(2)  | -1.2(2)   | 18.9(3)  |
| O1   | 57.5(13) | 32.9(11) | 51.9(13) | -4.7(9)  | -12.5(10) | 8.8(9)   |
| N1   | 34.8(11) | 32.7(11) | 38.0(12) | -0.7(9)  | -2.3(9)   | 17.6(9)  |
| C1   | 35.5(14) | 30.8(13) | 40.7(14) | -4.0(11) | -4.0(11)  | 14.2(11) |

**Table S45. Anisotropic Displacement Parameters ( $\text{\AA}^2 \times 10^3$ ) for 2ak. The Anisotropic displacement factor exponent takes the form:  $-2\pi^2[h^2a^*^2U_{11}+2hka^*b^*U_{12}+\dots]$ .**

| Atom | U <sub>11</sub> | U <sub>22</sub> | U <sub>33</sub> | U <sub>23</sub> | U <sub>13</sub> | U <sub>12</sub> |
|------|-----------------|-----------------|-----------------|-----------------|-----------------|-----------------|
| C2   | 40.6(14)        | 33.1(13)        | 35.7(14)        | 1.0(11)         | 1.0(11)         | 19.1(12)        |
| C3   | 48.0(16)        | 33.0(14)        | 40.3(15)        | 3.6(11)         | 2.1(12)         | 16.3(12)        |
| C4   | 60.0(18)        | 35.8(14)        | 42.0(15)        | 8.5(12)         | 9.0(13)         | 25.7(14)        |
| C5   | 54.7(17)        | 41.0(15)        | 42.6(15)        | 5.0(12)         | -1.6(13)        | 29.9(14)        |
| C6   | 43.5(15)        | 41.2(15)        | 37.3(14)        | 1.3(11)         | -1.0(12)        | 24.3(12)        |
| C7   | 37.9(14)        | 31.3(13)        | 34.2(13)        | 2.2(10)         | 3.4(10)         | 20.1(11)        |
| C8   | 30.3(13)        | 31.5(13)        | 37.0(13)        | 0.7(10)         | 1.4(10)         | 18.1(11)        |
| C9   | 32.2(13)        | 29.9(12)        | 37.7(13)        | -0.8(10)        | -0.5(10)        | 17.0(11)        |
| C10  | 34.2(13)        | 33.2(13)        | 36.8(13)        | -1.4(10)        | -3.3(11)        | 17.5(11)        |
| C11  | 49.5(16)        | 34.4(14)        | 36.3(14)        | -0.9(11)        | 2.7(12)         | 24.1(13)        |
| C12  | 32.7(13)        | 35.1(14)        | 38.5(14)        | 0.3(11)         | 2.2(11)         | 18.9(11)        |
| C13  | 33.4(14)        | 39.0(14)        | 36.6(14)        | 5.9(11)         | 7.1(11)         | 18.1(12)        |
| C14  | 46.7(16)        | 45.1(16)        | 45.0(16)        | 5.5(13)         | -5.7(13)        | 19.9(14)        |
| C15  | 64(2)           | 58(2)           | 48.8(18)        | 14.4(15)        | -2.6(15)        | 28.7(17)        |
| C16  | 67(2)           | 48.9(18)        | 57(2)           | 16.7(15)        | 12.9(17)        | 27.7(17)        |
| C17  | 53.7(18)        | 38.8(16)        | 56.2(18)        | 6.2(14)         | 13.0(15)        | 17.9(14)        |
| C18  | 40.0(15)        | 40.5(15)        | 40.4(15)        | 2.5(12)         | 5.2(12)         | 17.3(13)        |
| C19  | 36.5(14)        | 32.1(13)        | 33.9(13)        | -2.2(10)        | 1.2(10)         | 16.9(11)        |
| C20  | 37.3(14)        | 32.7(13)        | 38.3(14)        | -1.2(11)        | -1.0(11)        | 19.1(11)        |
| C21  | 38.2(14)        | 40.4(15)        | 42.4(15)        | -0.6(12)        | -2.8(12)        | 18.0(12)        |
| C22  | 37.2(15)        | 38.8(15)        | 47.6(16)        | -4.3(12)        | -2.4(12)        | 13.3(12)        |
| C23  | 43.3(15)        | 31.3(14)        | 47.5(16)        | -4.5(12)        | 4.6(13)         | 14.3(12)        |
| C24  | 40.1(14)        | 35.0(14)        | 43.2(15)        | 0.6(11)         | 4.4(11)         | 21.0(12)        |



**Table S46. Bond Lengths for 2ak.**

| Atom Atom Length/Å |     |          | Atom Atom Length/Å |     |          |
|--------------------|-----|----------|--------------------|-----|----------|
| S1                 | C9  | 1.806(2) | C9                 | C12 | 1.589(3) |
| S1                 | C19 | 1.756(3) | C10                | C11 | 1.545(3) |
| O1                 | C1  | 1.414(3) | C11                | C12 | 1.554(3) |
| N1                 | C8  | 1.283(3) | C12                | C13 | 1.515(3) |
| N1                 | C20 | 1.406(3) | C13                | C14 | 1.386(4) |
| C1                 | C2  | 1.508(4) | C13                | C18 | 1.391(4) |
| C1                 | C10 | 1.522(3) | C14                | C15 | 1.390(4) |
| C2                 | C3  | 1.392(3) | C15                | C16 | 1.381(4) |
| C2                 | C7  | 1.404(4) | C16                | C17 | 1.379(5) |
| C3                 | C4  | 1.385(4) | C17                | C18 | 1.389(4) |
| C4                 | C5  | 1.381(4) | C19                | C20 | 1.406(3) |
| C5                 | C6  | 1.380(3) | C19                | C24 | 1.395(3) |
| C6                 | C7  | 1.404(3) | C20                | C21 | 1.392(4) |
| C7                 | C8  | 1.484(3) | C21                | C22 | 1.386(4) |
| C8                 | C9  | 1.515(3) | C22                | C23 | 1.388(4) |
| C9                 | C10 | 1.540(3) | C23                | C24 | 1.382(4) |

**Table S47. Bond Angles for 2ak.**

| Atom Atom Atom Angle/° |    |     |           | Atom Atom Atom Angle/° |     |     |           |
|------------------------|----|-----|-----------|------------------------|-----|-----|-----------|
| C19                    | S1 | C9  | 96.72(11) | C1                     | C10 | C11 | 121.0(2)  |
| C8                     | N1 | C20 | 120.7(2)  | C9                     | C10 | C11 | 88.62(18) |
| O1                     | C1 | C2  | 112.4(2)  | C10                    | C11 | C12 | 89.61(18) |
| O1                     | C1 | C10 | 111.2(2)  | C11                    | C12 | C9  | 86.56(18) |
| C2                     | C1 | C10 | 111.4(2)  | C13                    | C12 | C9  | 114.2(2)  |
| C3                     | C2 | C1  | 121.2(2)  | C13                    | C12 | C11 | 117.9(2)  |
| C3                     | C2 | C7  | 119.2(2)  | C14                    | C13 | C12 | 123.3(2)  |

**Table S47. Bond Angles for 2ak.**

| Atom | Atom | Atom | Angle/°    | Atom | Atom | Atom | Angle/°    |
|------|------|------|------------|------|------|------|------------|
| C7   | C2   | C1   | 119.6(2)   | C14  | C13  | C18  | 118.3(3)   |
| C4   | C3   | C2   | 120.7(3)   | C18  | C13  | C12  | 118.4(2)   |
| C5   | C4   | C3   | 120.2(2)   | C13  | C14  | C15  | 120.5(3)   |
| C6   | C5   | C4   | 120.1(3)   | C16  | C15  | C14  | 120.8(3)   |
| C5   | C6   | C7   | 120.4(3)   | C17  | C16  | C15  | 119.1(3)   |
| C2   | C7   | C6   | 119.4(2)   | C16  | C17  | C18  | 120.2(3)   |
| C2   | C7   | C8   | 121.3(2)   | C17  | C18  | C13  | 121.0(3)   |
| C6   | C7   | C8   | 119.3(2)   | C20  | C19  | S1   | 119.60(19) |
| N1   | C8   | C7   | 118.0(2)   | C24  | C19  | S1   | 120.7(2)   |
| N1   | C8   | C9   | 123.0(2)   | C24  | C19  | C20  | 119.7(2)   |
| C7   | C8   | C9   | 118.9(2)   | C19  | C20  | N1   | 122.8(2)   |
| C8   | C9   | S1   | 107.91(16) | C21  | C20  | N1   | 117.5(2)   |
| C8   | C9   | C10  | 114.1(2)   | C21  | C20  | C19  | 119.4(2)   |
| C8   | C9   | C12  | 111.25(19) | C22  | C21  | C20  | 120.4(3)   |
| C10  | C9   | S1   | 114.24(17) | C21  | C22  | C23  | 119.9(3)   |
| C10  | C9   | C12  | 88.50(18)  | C24  | C23  | C22  | 120.4(2)   |
| C12  | C9   | S1   | 120.06(17) | C23  | C24  | C19  | 120.1(2)   |
| C1   | C10  | C9   | 116.0(2)   |      |      |      |            |

**Table S48. Hydrogen Bonds for 2ak.**

| D  | H  | A               | d(D-H)/Å | d(H-A)/Å | d(D-A)/Å | D-H-A/° |
|----|----|-----------------|----------|----------|----------|---------|
| O1 | H1 | O1 <sup>1</sup> | 0.84     | 1.85     | 2.658(2) | 159.7   |

<sup>1</sup>-1/3+Y,1/3-X+Y,4/3-Z

**Table S49. Torsion Angles for 2ak.**

| <b>A</b> | <b>B</b> | <b>C</b> | <b>D</b> | <b>Angle/°</b> | <b>A</b> | <b>B</b> | <b>C</b> | <b>D</b> | <b>Angle/°</b> |
|----------|----------|----------|----------|----------------|----------|----------|----------|----------|----------------|
| S1       | C9       | C10      | C1       | 93.9(2)        | C8       | C9       | C10      | C11      | 93.3(2)        |
| S1       | C9       | C10      | C11      | -141.88(18)    | C8       | C9       | C12      | C11      | -96.1(2)       |
| S1       | C9       | C12      | C11      | 136.61(19)     | C8       | C9       | C12      | C13      | 144.8(2)       |
| S1       | C9       | C12      | C13      | 17.5(3)        | C9       | S1       | C19      | C20      | 30.4(2)        |
| S1       | C19      | C20      | N1       | 7.7(4)         | C9       | S1       | C19      | C24      | -148.0(2)      |
| S1       | C19      | C20      | C21      | -177.9(2)      | C9       | C10      | C11      | C12      | 19.80(19)      |
| S1       | C19      | C24      | C23      | 177.6(2)       | C9       | C12      | C13      | C14      | 91.8(3)        |
| O1       | C1       | C2       | C3       | 22.7(3)        | C9       | C12      | C13      | C18      | -87.2(3)       |
| O1       | C1       | C2       | C7       | -159.3(2)      | C10      | C1       | C2       | C3       | 148.3(2)       |
| O1       | C1       | C10      | C9       | 175.8(2)       | C10      | C1       | C2       | C7       | -33.7(3)       |
| O1       | C1       | C10      | C11      | 70.5(3)        | C10      | C9       | C12      | C11      | 19.27(18)      |
| N1       | C8       | C9       | S1       | 49.2(3)        | C10      | C9       | C12      | C13      | -99.8(2)       |
| N1       | C8       | C9       | C10      | 177.3(2)       | C10      | C11      | C12      | C9       | -19.20(18)     |
| N1       | C8       | C9       | C12      | -84.5(3)       | C10      | C11      | C12      | C13      | 96.4(2)        |
| N1       | C20      | C21      | C22      | 175.5(2)       | C11      | C12      | C13      | C14      | -7.6(4)        |
| C1       | C2       | C3       | C4       | 177.8(3)       | C11      | C12      | C13      | C18      | 173.4(2)       |
| C1       | C2       | C7       | C6       | -178.6(2)      | C12      | C9       | C10      | C1       | -143.5(2)      |
| C1       | C2       | C7       | C8       | -0.8(4)        | C12      | C9       | C10      | C11      | -19.36(18)     |
| C1       | C10      | C11      | C12      | 139.7(2)       | C12      | C13      | C14      | C15      | -178.4(3)      |
| C2       | C1       | C10      | C9       | 49.6(3)        | C12      | C13      | C18      | C17      | 178.1(2)       |
| C2       | C1       | C10      | C11      | -55.6(3)       | C13      | C14      | C15      | C16      | 0.0(5)         |
| C2       | C3       | C4       | C5       | 1.2(4)         | C14      | C13      | C18      | C17      | -0.9(4)        |
| C2       | C7       | C8       | N1       | -160.5(2)      | C14      | C15      | C16      | C17      | 0.0(5)         |
| C2       | C7       | C8       | C9       | 21.1(3)        | C15      | C16      | C17      | C18      | -0.4(5)        |
| C3       | C2       | C7       | C6       | -0.6(4)        | C16      | C17      | C18      | C13      | 0.9(4)         |
| C3       | C2       | C7       | C8       | 177.3(2)       | C18      | C13      | C14      | C15      | 0.5(4)         |

**Table S49. Torsion Angles for 2ak.**

| A  | B  | C   | D   | Angle/°     | A   | B   | C   | D   | Angle/°    |
|----|----|-----|-----|-------------|-----|-----|-----|-----|------------|
| C3 | C4 | C5  | C6  | -1.5(4)     | C19 | S1  | C9  | C8  | -53.53(19) |
| C4 | C5 | C6  | C7  | 0.8(4)      | C19 | S1  | C9  | C10 | 178.46(18) |
| C5 | C6 | C7  | C2  | 0.2(4)      | C19 | S1  | C9  | C12 | 75.3(2)    |
| C5 | C6 | C7  | C8  | -177.6(2)   | C19 | C20 | C21 | C22 | 0.8(4)     |
| C6 | C7 | C8  | N1  | 17.3(3)     | C20 | N1  | C8  | C7  | 175.9(2)   |
| C6 | C7 | C8  | C9  | -161.1(2)   | C20 | N1  | C8  | C9  | -5.7(4)    |
| C7 | C2 | C3  | C4  | -0.2(4)     | C20 | C19 | C24 | C23 | -0.8(4)    |
| C7 | C8 | C9  | S1  | -132.45(19) | C20 | C21 | C22 | C23 | -1.8(4)    |
| C7 | C8 | C9  | C10 | -4.3(3)     | C21 | C22 | C23 | C24 | 1.5(4)     |
| C7 | C8 | C9  | C12 | 93.9(3)     | C22 | C23 | C24 | C19 | -0.2(4)    |
| C8 | N1 | C20 | C19 | -27.1(4)    | C24 | C19 | C20 | N1  | -173.8(2)  |
| C8 | N1 | C20 | C21 | 158.4(2)    | C24 | C19 | C20 | C21 | 0.6(4)     |
| C8 | C9 | C10 | C1  | -30.9(3)    |     |     |     |     |            |

**Table S50. Hydrogen Atom Coordinates ( $\text{\AA} \times 10^4$ ) and Isotropic Displacement Parameters ( $\text{\AA}^2 \times 10^3$ ) for 2ak.**

| Atom | x       | y       | z       | U(eq) |
|------|---------|---------|---------|-------|
| H1   | 2621.03 | 5959.22 | 6431.63 | 80    |
| H1A  | 2635.89 | 5359.63 | 4520.6  | 44    |
| H3   | 2647.31 | 6324.81 | 4128.29 | 51    |
| H4   | 2239.94 | 6538.84 | 2494.08 | 54    |
| H5   | 1506.73 | 5956.14 | 1549.67 | 52    |
| H6   | 1195.31 | 5151.47 | 2147.45 | 47    |
| H10  | 2287.34 | 4915.57 | 6605.41 | 41    |
| H11A | 1608.63 | 5263.2  | 6598.44 | 46    |
| H11B | 1777.45 | 5069.8  | 7969.71 | 46    |
| H12  | 1034.24 | 4459.91 | 6155.46 | 41    |

**Table S50. Hydrogen Atom Coordinates ( $\text{\AA} \times 10^4$ ) and Isotropic Displacement Parameters ( $\text{\AA}^2 \times 10^3$ ) for 2ak.**

| Atom | x       | y       | z        | U(eq) |
|------|---------|---------|----------|-------|
| H14  | 1809.21 | 4502.72 | 8932.43  | 56    |
| H15  | 1695.9  | 3862    | 10371.14 | 69    |
| H16  | 1108.31 | 3077.32 | 9808.49  | 70    |
| H17  | 632.06  | 2936.34 | 7781.13  | 62    |
| H18  | 736.67  | 3576.02 | 6353.11  | 50    |
| H21  | 424.65  | 3735.26 | 2092.03  | 49    |
| H22  | 116.9   | 2907.04 | 2234.95  | 53    |
| H23  | 567.64  | 2605.84 | 3315.87  | 51    |
| H24  | 1308.61 | 3126.89 | 4351.68  | 46    |

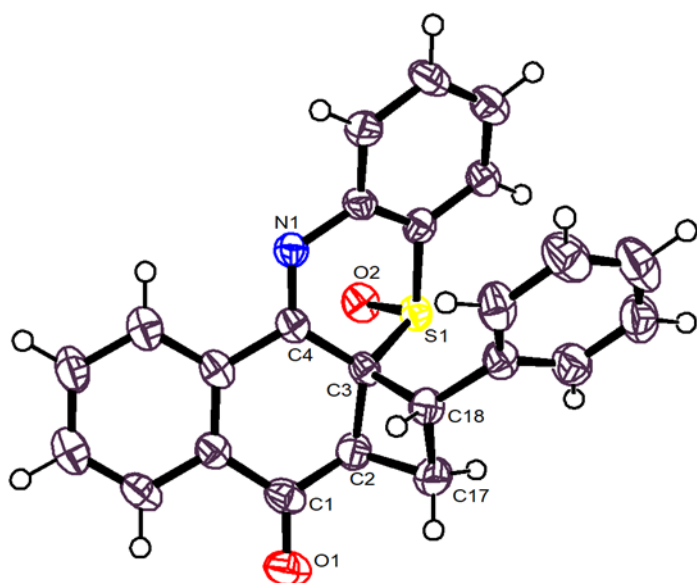

**Table S51. Crystal data and structure refinement for 2al.**

|                     |                                                 |
|---------------------|-------------------------------------------------|
| Identification code | <b>2al</b>                                      |
| CCDC Number         | <b>2403404</b>                                  |
| Empirical formula   | $\text{C}_{24}\text{H}_{17}\text{NO}_2\text{S}$ |
| Formula weight      | 383.47                                          |
| Temperature/K       | 140.0                                           |
| Crystal system      | orthorhombic                                    |

|                                             |                                                               |
|---------------------------------------------|---------------------------------------------------------------|
| Space group                                 | P2 <sub>1</sub> 2 <sub>1</sub> 2 <sub>1</sub>                 |
| a/Å                                         | 7.3105(8)                                                     |
| b/Å                                         | 9.5818(10)                                                    |
| c/Å                                         | 26.479(3)                                                     |
| α/°                                         | 90                                                            |
| β/°                                         | 90                                                            |
| γ/°                                         | 90                                                            |
| Volume/Å <sup>3</sup>                       | 1854.8(3)                                                     |
| Z                                           | 4                                                             |
| ρ <sub>calc</sub> /cm <sup>3</sup>          | 1.3732                                                        |
| μ/mm <sup>-1</sup>                          | 0.195                                                         |
| F(000)                                      | 800.8                                                         |
| Crystal size/mm <sup>3</sup>                | 0.02 × 0.015 × 0.012                                          |
| Radiation                                   | Mo Kα (λ = 0.71073)                                           |
| 2Θ range for data collection/°              | 4.52 to 60.34                                                 |
| Index ranges                                | -10 ≤ h ≤ 10, -13 ≤ k ≤ 13, -37 ≤ l ≤ 34                      |
| Reflections collected                       | 28021                                                         |
| Independent reflections                     | 5461 [R <sub>int</sub> = 0.1912, R <sub>sigma</sub> = 0.1939] |
| Data/restraints/parameters                  | 5461/0/253                                                    |
| Goodness-of-fit on F <sup>2</sup>           | 0.994                                                         |
| Final R indexes [I >= 2σ (I)]               | R <sub>1</sub> = 0.0689, wR <sub>2</sub> = 0.1323             |
| Final R indexes [all data]                  | R <sub>1</sub> = 0.1755, wR <sub>2</sub> = 0.1729             |
| Largest diff. peak/hole / e Å <sup>-3</sup> | 0.68/-0.74                                                    |
| Flack parameter                             | 0.2(2)                                                        |

**Table S52. Fractional Atomic Coordinates (×10<sup>4</sup>) and Equivalent Isotropic Displacement Parameters (Å<sup>2</sup>×10<sup>3</sup>) for 2a1. U<sub>eq</sub> is defined as 1/3 of the trace of the orthogonalised U<sub>ij</sub> tensor.**

| Atom | x         | y          | z         | U(eq)   |
|------|-----------|------------|-----------|---------|
| S1   | 713.0(14) | 7639.3(10) | 3253.6(4) | 32.0(3) |
| O2   | 780(4)    | 9082(3)    | 3041.4(9) | 37.1(7) |

**Table S52. Fractional Atomic Coordinates ( $\times 10^4$ ) and Equivalent Isotropic Displacement Parameters ( $\text{\AA}^2 \times 10^3$ ) for 2aI.  $U_{\text{eq}}$  is defined as 1/3 of the trace of the orthogonalised  $U_{ij}$  tensor.**

| Atom | <i>x</i> | <i>y</i> | <i>z</i>   | $U(\text{eq})$ |
|------|----------|----------|------------|----------------|
| N1   | 4844(4)  | 7821(3)  | 3525.9(11) | 29.3(8)        |
| O1   | 415(5)   | 9426(3)  | 5059.6(11) | 51.3(9)        |
| C11  | 4324(6)  | 6856(4)  | 3150.4(13) | 30.0(9)        |
| C4   | 3644(5)  | 8279(4)  | 3843.7(14) | 28.3(9)        |
| C3   | 1717(5)  | 7762(4)  | 3881.5(13) | 26.8(9)        |
| C16  | 2539(6)  | 6666(4)  | 2991.2(15) | 30.2(9)        |
| C12  | 5702(6)  | 6114(4)  | 2916.8(15) | 36.3(10)       |
| C19  | 1159(6)  | 4994(4)  | 3950.0(15) | 33.3(10)       |
| C5   | 4216(6)  | 9396(4)  | 4194.7(14) | 30.4(9)        |
| C18  | 1229(6)  | 6414(4)  | 4198.6(15) | 32.1(10)       |
| C15  | 2103(6)  | 5718(4)  | 2608.9(14) | 32.2(10)       |
| C6   | 3129(6)  | 9848(4)  | 4590.9(15) | 32.4(10)       |
| C14  | 3495(6)  | 4963(5)  | 2383.8(16) | 41.5(11)       |
| C2   | 384(6)   | 8562(4)  | 4223.9(15) | 35.9(10)       |
| C20  | 2760(7)  | 4218(4)  | 3921.5(16) | 41.3(12)       |
| C1   | 1259(6)  | 9285(4)  | 4664.0(15) | 37.4(11)       |
| C10  | 5946(6)  | 10008(4) | 4138.7(16) | 39.8(11)       |
| C7   | 3747(7)  | 10842(4) | 4932.6(15) | 38.7(11)       |
| C13  | 5309(6)  | 5157(5)  | 2533.9(17) | 43.7(12)       |
| C17  | -557(7)  | 7182(4)  | 4360.2(16) | 45.1(11)       |
| C8   | 5460(7)  | 11418(4) | 4872.3(17) | 43.6(11)       |
| C24  | -426(7)  | 4448(5)  | 3746.7(16) | 45.8(12)       |
| C23  | -407(8)  | 3151(5)  | 3511.8(17) | 51.8(13)       |
| C9   | 6539(7)  | 11016(4) | 4475.2(17) | 44.9(12)       |
| C21  | 2768(8)  | 2926(5)  | 3682.2(16) | 53.4(14)       |
| C22  | 1172(8)  | 2406(5)  | 3477.0(17) | 59.1(14)       |

**Table S53. Anisotropic Displacement Parameters ( $\text{\AA}^2 \times 10^3$ ) for 2a1. The Anisotropic displacement factor exponent takes the form:  $-2\pi^2[h^2a^*^2U_{11}+2hka^*b^*U_{12}+\dots]$ .**

| Atom | U <sub>11</sub> | U <sub>22</sub> | U <sub>33</sub> | U <sub>12</sub> | U <sub>13</sub> | U <sub>23</sub> |
|------|-----------------|-----------------|-----------------|-----------------|-----------------|-----------------|
| S1   | 30.7(5)         | 28.5(5)         | 36.9(5)         | 0.1(5)          | -2.2(5)         | -2.0(4)         |
| O2   | 45.0(18)        | 27.0(15)        | 39.3(15)        | 6.2(15)         | -4.9(14)        | 6.1(12)         |
| N1   | 30.7(18)        | 27.6(18)        | 29.7(16)        | -0.3(15)        | 0.5(14)         | -0.0(15)        |
| O1   | 52(2)           | 61(2)           | 41.3(18)        | 3.3(18)         | 11.0(16)        | -12.5(16)       |
| C11  | 38(2)           | 22.1(18)        | 30(2)           | 0.3(19)         | 7(2)            | -0.6(16)        |
| C4   | 34(2)           | 26(2)           | 25(2)           | 1.0(18)         | -4.1(18)        | 1.4(16)         |
| C3   | 32(2)           | 21.1(18)        | 27(2)           | 1.2(17)         | -2.2(16)        | -0.8(17)        |
| C16  | 30(2)           | 27(2)           | 33(2)           | -0.2(18)        | 0.1(18)         | 3.7(19)         |
| C12  | 34(2)           | 33(2)           | 42(2)           | 1(2)            | 6(2)            | -3.9(19)        |
| C19  | 42(3)           | 27(2)           | 31(2)           | -2(2)           | -1.5(19)        | 5.2(18)         |
| C5   | 39(2)           | 23.1(18)        | 30(2)           | 4(2)            | -7(2)           | 1.2(16)         |
| C18  | 38(3)           | 23.9(19)        | 34(2)           | 1.1(18)         | 1.4(19)         | 3.3(17)         |
| C15  | 36(3)           | 26(2)           | 34(2)           | 2(2)            | -1.4(19)        | 1.3(19)         |
| C6   | 40(3)           | 28(2)           | 29(2)           | 1(2)            | -1.8(19)        | 0.3(18)         |
| C14  | 52(3)           | 39(3)           | 34(3)           | 0(2)            | -2(2)           | -7(2)           |
| C2   | 33(3)           | 33(2)           | 41(2)           | 0(2)            | 1(2)            | -0.9(19)        |
| C20  | 55(3)           | 29(2)           | 40(3)           | -4(2)           | -11(2)          | 7(2)            |
| C1   | 49(3)           | 30(2)           | 33(2)           | 8(2)            | 2(2)            | -1.6(19)        |
| C10  | 41(3)           | 33(2)           | 45(3)           | 0(2)            | -8(2)           | -3.9(19)        |
| C7   | 60(3)           | 29(2)           | 28(2)           | 3(2)            | -1(2)           | -3.5(18)        |
| C13  | 48(3)           | 42(3)           | 42(3)           | 5(2)            | 5(2)            | -18(2)          |
| C17  | 51(3)           | 34(2)           | 51(3)           | -6(2)           | 14(2)           | -3(2)           |
| C8   | 51(3)           | 33(2)           | 47(3)           | 1(2)            | -12(2)          | -7(2)           |
| C24  | 59(3)           | 38(3)           | 40(2)           | -5(3)           | 2(2)            | 1(2)            |
| C23  | 69(4)           | 38(3)           | 48(3)           | -13(3)          | -3(3)           | 1(2)            |
| C9   | 44(3)           | 37(3)           | 54(3)           | -5(2)           | -8(2)           | -13(2)          |
| C21  | 76(4)           | 38(3)           | 46(3)           | 8(3)            | -5(3)           | -2(2)           |
| C22  | 101(4)          | 32(3)           | 45(3)           | -4(3)           | -9(3)           | -5(2)           |



**Table S54. Bond Lengths for 2al.**

| Atom | Atom | Length/Å | Atom | Atom | Length/Å |
|------|------|----------|------|------|----------|
| S1   | O2   | 1.493(3) | C5   | C6   | 1.385(6) |
| S1   | C3   | 1.821(4) | C5   | C10  | 1.402(6) |
| S1   | C16  | 1.770(4) | C18  | C17  | 1.559(6) |
| N1   | C11  | 1.410(5) | C15  | C14  | 1.384(6) |
| N1   | C4   | 1.292(5) | C6   | C1   | 1.482(6) |
| O1   | C1   | 1.223(5) | C6   | C7   | 1.389(5) |
| C11  | C16  | 1.383(6) | C14  | C13  | 1.397(6) |
| C11  | C12  | 1.380(5) | C2   | C1   | 1.499(6) |
| C4   | C3   | 1.497(5) | C2   | C17  | 1.534(5) |
| C4   | C5   | 1.477(5) | C20  | C21  | 1.391(6) |
| C3   | C18  | 1.581(5) | C10  | C9   | 1.384(6) |
| C3   | C2   | 1.536(5) | C7   | C8   | 1.378(6) |
| C16  | C15  | 1.397(5) | C8   | C9   | 1.370(6) |
| C12  | C13  | 1.397(6) | C24  | C23  | 1.389(6) |
| C19  | C18  | 1.512(5) | C23  | C22  | 1.361(7) |
| C19  | C20  | 1.389(6) | C21  | C22  | 1.380(7) |
| C19  | C24  | 1.380(6) |      |      |          |

**Table S55. Bond Angles for 2al.**

| Atom | Atom | Atom | Angle/°    | Atom | Atom | Atom | Angle/°  |
|------|------|------|------------|------|------|------|----------|
| C3   | S1   | O2   | 105.70(16) | C19  | C18  | C3   | 120.8(3) |
| C16  | S1   | O2   | 108.37(18) | C17  | C18  | C3   | 87.1(3)  |
| C16  | S1   | C3   | 95.06(18)  | C17  | C18  | C19  | 121.1(4) |
| C4   | N1   | C11  | 120.0(3)   | C14  | C15  | C16  | 118.9(4) |
| C16  | C11  | N1   | 123.7(3)   | C1   | C6   | C5   | 120.9(4) |
| C12  | C11  | N1   | 117.2(4)   | C7   | C6   | C5   | 121.4(4) |
| C12  | C11  | C16  | 119.0(4)   | C7   | C6   | C1   | 117.7(4) |
| C3   | C4   | N1   | 124.7(3)   | C13  | C14  | C15  | 120.4(4) |

**Table S55. Bond Angles for 2al.**

| Atom | Atom | Atom | Angle/°  | Atom | Atom | Atom | Angle/°  |
|------|------|------|----------|------|------|------|----------|
| C5   | C4   | N1   | 117.6(4) | C1   | C2   | C3   | 114.8(4) |
| C5   | C4   | C3   | 117.6(4) | C17  | C2   | C3   | 89.6(3)  |
| C4   | C3   | S1   | 109.9(3) | C17  | C2   | C1   | 114.0(4) |
| C18  | C3   | S1   | 109.9(3) | C21  | C20  | C19  | 120.3(5) |
| C18  | C3   | C4   | 121.2(3) | C6   | C1   | O1   | 122.5(4) |
| C2   | C3   | S1   | 108.4(3) | C2   | C1   | O1   | 120.1(4) |
| C2   | C3   | C4   | 118.1(3) | C2   | C1   | C6   | 117.4(4) |
| C2   | C3   | C18  | 87.2(3)  | C9   | C10  | C5   | 120.4(4) |
| C11  | C16  | S1   | 121.5(3) | C8   | C7   | C6   | 119.7(4) |
| C15  | C16  | S1   | 117.0(3) | C14  | C13  | C12  | 119.3(4) |
| C15  | C16  | C11  | 121.5(4) | C2   | C17  | C18  | 88.1(3)  |
| C13  | C12  | C11  | 120.9(4) | C9   | C8   | C7   | 120.0(4) |
| C20  | C19  | C18  | 118.4(4) | C23  | C24  | C19  | 120.3(5) |
| C24  | C19  | C18  | 122.6(4) | C22  | C23  | C24  | 120.5(5) |
| C24  | C19  | C20  | 118.9(4) | C8   | C9   | C10  | 120.7(5) |
| C6   | C5   | C4   | 122.7(4) | C22  | C21  | C20  | 119.9(5) |
| C10  | C5   | C4   | 119.4(4) | C21  | C22  | C23  | 120.0(4) |
| C10  | C5   | C6   | 117.8(4) |      |      |      |          |

**Table S56. Hydrogen Atom Coordinates ( $\text{\AA} \times 10^4$ ) and Isotropic Displacement Parameters ( $\text{\AA}^2 \times 10^3$ ) for 2al.**

| Atom | x       | y       | z          | U(eq)    |
|------|---------|---------|------------|----------|
| H12  | 6936(6) | 6255(4) | 3017.8(15) | 43.6(12) |
| H18  | 2067(6) | 6363(4) | 4496.4(15) | 38.5(12) |
| H15  | 869(6)  | 5594(4) | 2505.0(14) | 38.6(12) |
| H14  | 3215(6) | 4309(5) | 2125.6(16) | 49.8(14) |
| H2   | -436(6) | 9198(4) | 4027.9(15) | 43.1(12) |
| H20  | 3856(7) | 4572(4) | 4066.0(16) | 49.6(14) |
| H10  | 6716(6) | 9729(4) | 3867.8(16) | 47.8(13) |

**Table S56. Hydrogen Atom Coordinates ( $\text{\AA}\times 10^4$ ) and Isotropic Displacement Parameters ( $\text{\AA}^2\times 10^3$ ) for 2al.**

| Atom | <i>x</i> | <i>y</i> | <i>z</i>   | U(eq)    |
|------|----------|----------|------------|----------|
| H7   | 2992(7)  | 11124(4) | 5206.3(15) | 46.4(13) |
| H13  | 6265(6)  | 4644(5)  | 2377.2(17) | 52.5(15) |
| H17a | -1631(7) | 6960(4)  | 4146.9(16) | 54.1(14) |
| H17b | -853(7)  | 7086(4)  | 4723.4(16) | 54.1(14) |
| H8   | 5893(7)  | 12095(4) | 5105.9(17) | 52.3(14) |
| H24  | -1535(7) | 4961(5)  | 3767.5(16) | 55.0(14) |
| H23  | -1505(8) | 2782(5)  | 3374.3(17) | 62.2(16) |
| H9   | 7707(7)  | 11432(4) | 4430.5(17) | 53.8(15) |
| H21  | 3869(8)  | 2403(5)  | 3660.1(16) | 64.0(17) |
| H22  | 1177(8)  | 1526(5)  | 3311.3(17) | 71.0(17) |

---

## 15. References.

1. a) *For ibuprofen*: H. Miao, M. Guan, T. Xiong, G. Zhang, and Q. Zhang, *Angew. Chem. Int. Ed.* 2023, **62**, e2022139; b) *For Flurbiprofen, Gemfibrozil, Clofibrilic acid, and Fenbufen*: A. Granados, R. K. Dhungana, M. Sharique, J. Majhi, and G. A. Molander, *Org. Lett.*, 2022, **24**, 4750–4755.
2. a) M. D. Cannatelli, and A. J. Ragauskas, *Tetrahedron Lett.*, 2016, **57**, 3749–3753; b) C. Belouezzane, A. C. Pinto, A. L. S. Lima, and F. S. Miranda, *J. Lumin.*, 2017, **192**, 1139–1148; c) F.-L. Zeng, X.-L. Chen, S.-Q. He, K. Sun, Y. Liu, R. Fu, L.-B. Qu, Y.-F. Zhao, and B. Yu, *Org. Chem. Front.*, 2019, **6**, 1476–1480; d) L. Xiong, S.-Q. He, J. Pan, and B. Yu, *New J. Chem.*, 2022, **46**, 4550–4554.
3. S. M. Hubig, T. M. Bockman, and J. K. Kochi, *J. Am. Chem. Soc.*, 1997, **119**, 2926–2935.
